# Supplementary material for: Identification and Confirmation of the miR-30 Family as a Potential Central Player in Tobacco-Related Head and Neck Squamous Cell Carcinoma
Source: Front Oncol. 2021 Jul 13;11:616372. doi: 10.3389/fonc.2021.616372 (PMC8315965; doi:10.3389/fonc.2021.616372)
Supplement: Supplementary file 3 [file Table_1.xlsx]

## Sheet: Sheet1
Table 1. Primers used for real time PCR
miR-30a-5p	Forward	TGTAAACATCCTCGACTGGAAG
miR-30a-3p	Forward	CTTTCAGTCGGATGTTTGCAGC
miR-30b-5p	Forward	TGTAAACATCCTCGACTGGAAG
miR-30c-5p	Forward	TGTAAACATCCTACACTCTCAGCAA
miR-30d-5p	Forward	GTAAACATCCCCGACTGGAAG
miR-30e-5p	Forward	TGTAAACATCCTTGACTGGAAGG
miR-30e-3p	Forward	CTTTCAGTCGGATGTTTACAGC
U6	Forward	CTTGAACCTCCTCGTTCGACCCCGCCTC
Ubadc1	Forward	TCGGGCTGTCATTTCGC
	Reverse	TGCCCTGGTCCAACTCCT
Ldhb	Forward	GGATTCTGCTCGGTTTCGT
	Reverse	CTTCCAGTTCTCGCTGTCATT
Cabc1	Forward	AGCCAGGAAGTGCGGAATG
	Reverse	GCCCGGATGACCTGAATGTA
β-actin	Forward	CAGGTCATCACTATCGGCAAT
	Reverse	GAGGTCTTTACGGATGTCAAC
STC1	Forward	GTGGCGGCTCAAAACTCAG
	Reverse	GTGGAGCACCTCCGAATGG
RTN4R	Forward	GGTGCCTGCGTATGCTACAAT
	Reverse	CACATGCGAGATGCGGTTG
LYN	Forward	GCTTTTGGCACCAGGAAATAGC
	Reverse	TCATGTCGCTGATACAGGGAA
CEACAM1	Forward	TGCTCTGATAGCAGTAGCCCT
	Reverse	TGCCGGTCTTCCCGAAATG
MYO5A	Forward	CAGAGTCCGCTTTATTGATTCCA
	Reverse	ATCACCCATGTTCTGACCACT
SLC4A7	Forward	ATCTTGGCAAAACTAGCTCAACT
	Forward	CGACTCTCTTTACTAAACGGGAC
KRAS	Reverse	ACAGAGAGTGGAGGATGCTTT
	Forward	TTTCACACAGCCAGGAGTCTT
