# Supplementary material for: Identification and Confirmation of the miR-30 Family as a Potential Central Player in Tobacco-Related Head and Neck Squamous Cell Carcinoma
Source: Front Oncol. 2021 Jul 13;11:616372. doi: 10.3389/fonc.2021.616372 (PMC8315965; doi:10.3389/fonc.2021.616372)
Supplement: Supplementary file 4 [file Table_2.xls]

## Sheet: all
miRNA	Fold change(cancer/normal)	cancer score	Normal score
rno-let-7a	0.493446	811.353	1644.26
rno-let-7b	0.523368	838.786	1602.67
rno-let-7b*	1.19557	12.2532	10.2488
rno-let-7c	0.506887	948.771	1871.76
rno-let-7d	0.41489	314.167	757.23
rno-let-7d*	1.33085	3.30353	2.48228
rno-let-7e	0.714871	151.233	211.553
rno-let-7e*	1.61551	1.61551	1
rno-let-7f	0.494549	787.104	1591.56
rno-let-7i	0.656559	678.186	1032.94
rno-let-7i*	1	1	1
rno-miR-1	0.0410386	256.924	6260.54
rno-miR-1*	1.4694	11.4138	7.76767
rno-miR-100	0.134437	9.55676	71.0873
rno-miR-101a	0.102786	5.92834	57.6763
rno-miR-101a*	1	1	1
rno-miR-101b	0.626565	13.1489	20.9857
rno-miR-103	0.660109	65.588	99.3594
rno-miR-106b	0.945856	59.1668	62.5537
rno-miR-106b*	1	1	1
rno-miR-107	0.580245	67.815	116.873
rno-miR-10a-3p	1	1	1
rno-miR-10a-5p	0.198835	1.2531	6.30221
rno-miR-10b	0.185546	13.7328	74.0129
rno-miR-122	1	1	1
rno-miR-124	1	1	1
rno-miR-124*	1	1	1
rno-miR-125a-3p	1.52922	7.1037	4.64532
rno-miR-125a-5p	0.923329	50.943	55.1732
rno-miR-125b*	1	1	1
rno-miR-125b-3p	1	1	1
rno-miR-125b-5p	0.561362	410.31	730.919
rno-miR-126	0.327057	167.146	511.061
rno-miR-126*	0.153034	3.15057	20.5874
rno-miR-127	0.0440587	1.33523	30.3057
rno-miR-128	0.187022	15.0903	80.6872
rno-miR-129	1	1	1
rno-miR-129*	0.652676	5.00731	7.67197
rno-miR-130a	0.965071	183.213	189.844
rno-miR-130b	5.83684	5.83684	1
rno-miR-132	5.81487	5.81487	1
rno-miR-133a	0.0905727	14.4593	159.643
rno-miR-133b	0.0802485	385.294	4801.26
rno-miR-134	1.39053	17.4099	12.5203
rno-miR-135a	1	1	1
rno-miR-135a*	1	1	1
rno-miR-135b	1.51342	2.14625	1.41815
rno-miR-136	0.0486008	1	20.5758
rno-miR-136*	0.337563	1	2.96241
rno-miR-137	1	1	1
rno-miR-138	1	1	1
rno-miR-138*	1	1	1
rno-miR-139-3p	0.921764	9.79835	10.63
rno-miR-139-5p	1	1	1
rno-miR-140	0.865792	30.0105	34.6625
rno-miR-140*	1.22529	27.1495	22.1577
rno-miR-141	1.28652	74.9538	58.2607
rno-miR-142-3p	1.90206	70.6954	37.1679
rno-miR-142-5p	1	1	1
rno-miR-143	0.301917	125.864	416.883
rno-miR-144	0.411139	1	2.43227
rno-miR-145	0.210692	3.56419	16.9166
rno-miR-146a	1.10859	86.6294	78.1441
rno-miR-146b	2.36787	54.767	23.1292
rno-miR-147	1	1	1
rno-miR-148b-3p	0.486315	5.68969	11.6996
rno-miR-148b-5p	1	1	1
rno-miR-150	0.199722	22.7663	113.99
rno-miR-151	0.426391	52.4772	123.073
rno-miR-151*	1	1	1
rno-miR-152	0.679206	11.4637	16.8781
rno-miR-153	1	1	1
rno-miR-154	0.391124	1.76879	4.52232
rno-miR-15b	1.09211	254	232.577
rno-miR-16	0.805803	537.198	666.662
rno-miR-17	0.896296	23.92	26.6876
rno-miR-17-3p	1	1	1
rno-miR-181a	0.738751	50.629	68.5332
rno-miR-181a*	1.21785	2.08486	1.71192
rno-miR-181b	0.842062	9.84227	11.6883
rno-miR-181c	0.735157	1.86963	2.54317
rno-miR-181d	0.592882	4.89234	8.2518
rno-miR-182	1.86182	8.21443	4.41204
rno-miR-183	1.07683	22.7761	21.1511
rno-miR-184	1	1	1
rno-miR-185	0.199702	4.51869	22.6272
rno-miR-186	0.571834	7.94095	13.8868
rno-miR-187	1	1	1
rno-miR-188	2.37306	28.2572	11.9075
rno-miR-18a	6.33445	6.33445	1
rno-miR-190	1	1	1
rno-miR-190b	1	1	1
rno-miR-191	0.725011	1	1.37929
rno-miR-192	1.1852	6.58122	5.55282
rno-miR-193	1.42096	15.2482	10.7309
rno-miR-193*	1	1	1
rno-miR-194	1	1	1
rno-miR-195	0.336547	75.895	225.511
rno-miR-196a	1	1	1
rno-miR-196a*	1	1	1
rno-miR-196b	1	1	1
rno-miR-196c	1	1	1
rno-miR-199a-3p	0.800187	310.335	387.828
rno-miR-199a-5p	1.55206	84.9402	54.7273
rno-miR-19a	1.08314	8.26425	7.62993
rno-miR-19b	0.817153	61.5757	75.3539
rno-miR-200a	0.754963	50.9126	67.4372
rno-miR-200b	0.799802	168.268	210.387
rno-miR-200c	0.994916	383.575	385.535
rno-miR-203	0.61991	500.224	806.93
rno-miR-204	0.154129	8.97579	58.2355
rno-miR-204*	1	1	1
rno-miR-205	1.08053	1198.52	1109.2
rno-miR-206	0.28041	423.529	1510.39
rno-miR-207	1.55947	1.55947	1
rno-miR-208	1	1	1
rno-miR-20a	0.824026	110.506	134.105
rno-miR-20a*	1	1	1
rno-miR-20b-3p	1	1	1
rno-miR-20b-5p	1	1	1
rno-miR-21	4.92034	6006.51	1220.75
rno-miR-21*	3.86219	3.86219	1
rno-miR-210	1.17094	34.8481	29.7609
rno-miR-211	3.94724	3.94724	1
rno-miR-212	0.851092	13.7659	16.1744
rno-miR-214	1.40988	161.383	114.466
rno-miR-215	1	1	1
rno-miR-216a	1	1	1
rno-miR-217	1	1	1
rno-miR-218	0.60552	7.66377	12.6565
rno-miR-218*	1	1	1
rno-miR-219-1-3p	1	1	1
rno-miR-219-2-3p	1	1	1
rno-miR-219-5p	0.80694	1	1.23925
rno-miR-22	0.347979	459.736	1321.16
rno-miR-22*	0.120891	1	8.27191
rno-miR-221	2.86504	52.1425	18.1996
rno-miR-222	12.6403	12.6403	1
rno-miR-223	2.79401	232.231	83.1176
rno-miR-224	0.062681	1	15.9538
rno-miR-23a	0.503641	1002.81	1991.12
rno-miR-23a*	1	1	1
rno-miR-23b	0.509626	739.289	1450.65
rno-miR-24	0.614619	772.054	1256.15
rno-miR-24-1*	1	1	1
rno-miR-24-2*	0.28848	1	3.46645
rno-miR-25	0.75328	70.8907	94.1093
rno-miR-25*	1	1	1
rno-miR-26a	0.271755	273.076	1004.86
rno-miR-26b	0.270838	114.365	422.264
rno-miR-26b*	0.982061	1.63137	1.66117
rno-miR-27a	0.907856	906.682	998.707
rno-miR-27a*	1	1	1
rno-miR-27b	0.633814	442.37	697.949
rno-miR-28	0.681862	11.3541	16.6516
rno-miR-28*	1	1	1
rno-miR-290	1.16086	1.33966	1.15402
rno-miR-291a-3p	2.14297	2.17445	1.01469
rno-miR-291a-5p	1	1	1
rno-miR-292-3p	1	1	1
rno-miR-292-5p	1	1	1
rno-miR-296	1	1	1
rno-miR-296*	1.03083	14.1717	13.7479
rno-miR-297	1	1	1
rno-miR-298	1.16184	6.21751	5.35142
rno-miR-299	0.0445883	1.32474	29.7105
rno-miR-29a	0.312028	370.674	1187.95
rno-miR-29a*	1	1	1
rno-miR-29b	0.335565	230.511	686.934
rno-miR-29b-1*	2.7288	2.7288	1
rno-miR-29b-2*	1	1	1
rno-miR-29c	0.13038	45.9086	352.115
rno-miR-29c*	0.151526	3.00295	19.818
rno-miR-300-3p	0.137013	2.36259	17.2436
rno-miR-300-5p	1	1	1
rno-miR-301a	0.642383	8.2816	12.892
rno-miR-301b	1	1	1
rno-miR-30a	0.130784	50.2224	384.009
rno-miR-30a*	0.0965601	7.10633	73.5949
rno-miR-30b-3p	0.470608	1	2.12491
rno-miR-30b-5p	0.33133	34.064	102.81
rno-miR-30c	0.179607	91.1705	507.61
rno-miR-30c-1*	1	1	1
rno-miR-30c-2*	0.12489	1	8.00707
rno-miR-30d	0.375335	41.5278	110.642
rno-miR-30d*	1	1	1
rno-miR-30e	0.130328	25.3445	194.467
rno-miR-30e*	0.0856343	5.2856	61.7229
rno-miR-31	7.92742	355.249	44.8127
rno-miR-32	1	1	1
rno-miR-320	0.459013	7.42885	16.1844
rno-miR-322	0.339173	35.1281	103.57
rno-miR-322*	1	1	1
rno-miR-323	1	1	1
rno-miR-323*	1	1	1
rno-miR-324-3p	0.779978	61.6898	79.0917
rno-miR-324-5p	0.761195	9.79156	12.8634
rno-miR-325-3p	1	1	1
rno-miR-325-5p	1	1	1
rno-miR-326	0.265635	1	3.76456
rno-miR-327	0.845625	4.22069	4.99121
rno-miR-328	0.579231	14.3728	24.8136
rno-miR-329	0.376319	1.8566	4.93358
rno-miR-33	1	1	1
rno-miR-330	1	1	1
rno-miR-330*	1	1	1
rno-miR-331	0.916938	12.8176	13.9787
rno-miR-333_v11.0	0.59286	1	1.68674
rno-miR-335	1	1	1
rno-miR-336	1.33381	1.33381	1
rno-miR-337	0.183077	1	5.46219
rno-miR-338	0.18732	9.14403	48.8149
rno-miR-338*	1	1	1
rno-miR-339-3p	1	1	1
rno-miR-339-5p	1	1	1
rno-miR-340-3p	3.24859	3.24859	1
rno-miR-340-5p	1	1	1
rno-miR-341	1.15797	1.15797	1
rno-miR-342-3p	1.04325	14.9257	14.3069
rno-miR-342-5p	1	1	1
rno-miR-343	1	1	1
rno-miR-344-3p	1	1	1
rno-miR-344-5p	1	1	1
rno-miR-345-3p	1	1	1
rno-miR-345-5p	0.556853	15.6194	28.0494
rno-miR-346	0.66253	1.90341	2.87294
rno-miR-347	0.307389	2.50819	8.15967
rno-miR-349	1.75664	3.26982	1.86141
rno-miR-34a	0.822914	256.695	311.934
rno-miR-34b	4.22056	4.22056	1
rno-miR-34c	1	1	1
rno-miR-34c*	1	1	1
rno-miR-350	1	1	1
rno-miR-351	1	1	1
rno-miR-352	0.276188	5.64446	20.437
rno-miR-361	0.624245	12.5218	20.0591
rno-miR-363	1	1	1
rno-miR-363*	1	1	1
rno-miR-365	0.814284	17.4343	21.4106
rno-miR-369-3p	1	1	1
rno-miR-369-5p	0.17587	1	5.68601
rno-miR-370	1	1	1
rno-miR-374	1	1	1
rno-miR-375	1	1	1
rno-miR-376a	1	1	1
rno-miR-376a*	1	1	1
rno-miR-376b-3p	1	1	1
rno-miR-376b-5p	1	1	1
rno-miR-376c	1	1	1
rno-miR-377	1.07407	1.07407	1
rno-miR-378	0.14612	46.2575	316.572
rno-miR-378*	0.0716589	7.55149	105.381
rno-miR-379	0.121953	1	8.19987
rno-miR-379*	1	1	1
rno-miR-380	1	1	1
rno-miR-381	1	1	1
rno-miR-382	0.317811	1	3.14652
rno-miR-382*	1	1	1
rno-miR-383	1	1	1
rno-miR-384-3p	1	1	1
rno-miR-384-5p	1	1	1
rno-miR-409-3p	1.17943	19.6645	16.6729
rno-miR-409-5p	1	1	1
rno-miR-410	1	1	1
rno-miR-411	0.120605	1	8.29151
rno-miR-412	1	1	1
rno-miR-421	1	1	1
rno-miR-423	1	1	1
rno-miR-425	1.43289	9.86116	6.88201
rno-miR-429	0.80473	85.7963	106.615
rno-miR-431	1	1	1
rno-miR-433	1	1	1
rno-miR-434	0.153271	3.67177	23.956
rno-miR-448	1	1	1
rno-miR-449a	1	1	1
rno-miR-450a	1	1	1
rno-miR-451	0.244022	32.9195	134.904
rno-miR-455	1	1	1
rno-miR-463	1	1	1
rno-miR-466b	1.4628	9.32155	6.37242
rno-miR-466c	1	1	1
rno-miR-471	1	1	1
rno-miR-483	0.901972	11.0533	12.2546
rno-miR-484	1.03273	13.3731	12.9493
rno-miR-485	1	1	1
rno-miR-487b	0.385881	1	2.59147
rno-miR-488	1	1	1
rno-miR-489	1	1	1
rno-miR-493	1	1	1
rno-miR-494	1.22228	65.4599	53.5557
rno-miR-495	0.675463	1.53449	2.27176
rno-miR-497	0.365383	73.044	199.911
rno-miR-499	1	1	1
rno-miR-500	1.08817	31.8685	29.2863
rno-miR-501	1	1	1
rno-miR-503	1	1	1
rno-miR-505	1	1	1
rno-miR-532-3p	0.612434	1	1.63283
rno-miR-532-5p	0.956806	3.08904	3.22849
rno-miR-539	1	1	1
rno-miR-540	1	1	1
rno-miR-541	1	1	1
rno-miR-542-3p	1	1	1
rno-miR-542-5p	1	1	1
rno-miR-543	1	1	1
rno-miR-543*	0.372444	1	2.68497
rno-miR-551b	0.928772	1	1.07669
rno-miR-598-3p	0.910323	3.63856	3.997
rno-miR-598-5p	1	1	1
rno-miR-652	0.876603	29.4089	33.5487
rno-miR-664	0.864843	7.90285	9.1379
rno-miR-671	0.995897	2.54638	2.55687
rno-miR-672	1	1	1
rno-miR-673	1	1	1
rno-miR-674-3p	1	1	1
rno-miR-674-5p	1	1	1
rno-miR-708	0.518245	1	1.92959
rno-miR-708*	1	1	1
rno-miR-742	1	1	1
rno-miR-743a	1	1	1
rno-miR-743b	1	1	1
rno-miR-758	1	1	1
rno-miR-760-3p	1	1	1
rno-miR-760-5p	0.587927	1	1.70089
rno-miR-770	1	1	1
rno-miR-7a	1.40218	17.5243	12.4979
rno-miR-7a*	0.842063	1	1.18756
rno-miR-7b	1	1	1
rno-miR-871	1	1	1
rno-miR-872	0.674564	9.27694	13.7525
rno-miR-872*	1	1	1
rno-miR-873	1	1	1
rno-miR-874	1	1	1
rno-miR-877	1.91172	4.32605	2.26291
rno-miR-878	1	1	1
rno-miR-879	1	1	1
rno-miR-880	1	1	1
rno-miR-881	1	1	1
rno-miR-883	1	1	1
rno-miR-9	1	1	1
rno-miR-9*	1	1	1
rno-miR-92a	0.887306	159.842	180.143
rno-miR-92b	1.17443	6.81562	5.80336
rno-miR-93	0.893525	35.0983	39.2807
rno-miR-96	1.21348	45.8631	37.7947
rno-miR-98	0.637435	38.5726	60.5122
rno-miR-99a	0.319077	74.9361	234.853
rno-miR-99a*	1	1	1
rno-miR-99b	1.30852	28.2773	21.6101
rno-miR-99b*	1.38737	1.38737	1

## Sheet: up
miRNA	Fold change(cancer/normal)	cancer score	Normal score
rno-miR-146b	2.36787	54.767	23.1292
rno-miR-188	2.37306	28.2572	11.9075
rno-miR-21	4.92034	6006.51	1220.75
rno-miR-221	2.86504	52.1425	18.1996
rno-miR-222	12.6403	12.6403	1
rno-miR-223	2.79401	232.231	83.1176
rno-miR-31	7.92742	355.249	44.8127

## Sheet: down
miRNA	Fold change(cancer/normal)	cancer score	Normal score
rno-let-7a	0.493446	811.353	1644.26
rno-let-7d	0.41489	314.167	757.23
rno-let-7f	0.494549	787.104	1591.56
rno-miR-1	0.0410386	256.924	6260.54
rno-miR-100	0.134437	9.55676	71.0873
rno-miR-101a	0.102786	5.92834	57.6763
rno-miR-10b	0.185546	13.7328	74.0129
rno-miR-126	0.327057	167.146	511.061
rno-miR-126*	0.153034	3.15057	20.5874
rno-miR-127	0.0440587	1.33523	30.3057
rno-miR-128	0.187022	15.0903	80.6872
rno-miR-133a	0.0905727	14.4593	159.643
rno-miR-133b	0.0802485	385.294	4801.26
rno-miR-136	0.0486008	1	20.5758
rno-miR-143	0.301917	125.864	416.883
rno-miR-145	0.210692	3.56419	16.9166
rno-miR-148b-3p	0.486315	5.68969	11.6996
rno-miR-150	0.199722	22.7663	113.99
rno-miR-151	0.426391	52.4772	123.073
rno-miR-185	0.199702	4.51869	22.6272
rno-miR-195	0.336547	75.895	225.511
rno-miR-204	0.154129	8.97579	58.2355
rno-miR-206	0.28041	423.529	1510.39
rno-miR-22	0.347979	459.736	1321.16
rno-miR-224	0.062681	1	15.9538
rno-miR-26a	0.271755	273.076	1004.86
rno-miR-26b	0.270838	114.365	422.264
rno-miR-299	0.0445883	1.32474	29.7105
rno-miR-29a	0.312028	370.674	1187.95
rno-miR-29b	0.335565	230.511	686.934
rno-miR-29c	0.13038	45.9086	352.115
rno-miR-29c*	0.151526	3.00295	19.818
rno-miR-300-3p	0.137013	2.36259	17.2436
rno-miR-30a	0.130784	50.2224	384.009
rno-miR-30a*	0.0965601	7.10633	73.5949
rno-miR-30b-5p	0.33133	34.064	102.81
rno-miR-30c	0.179607	91.1705	507.61
rno-miR-30d	0.375335	41.5278	110.642
rno-miR-30e	0.130328	25.3445	194.467
rno-miR-30e*	0.0856343	5.2856	61.7229
rno-miR-320	0.459013	7.42885	16.1844
rno-miR-322	0.339173	35.1281	103.57
rno-miR-338	0.18732	9.14403	48.8149
rno-miR-352	0.276188	5.64446	20.437
rno-miR-378	0.14612	46.2575	316.572
rno-miR-378*	0.0716589	7.55149	105.381
rno-miR-434	0.153271	3.67177	23.956
rno-miR-451	0.244022	32.9195	134.904
rno-miR-497	0.365383	73.044	199.911
rno-miR-99a	0.319077	74.9361	234.853
