# Supplementary material for: Identification and Confirmation of the miR-30 Family as a Potential Central Player in Tobacco-Related Head and Neck Squamous Cell Carcinoma
Source: Front Oncol. 2021 Jul 13;11:616372. doi: 10.3389/fonc.2021.616372 (PMC8315965; doi:10.3389/fonc.2021.616372)
Supplement: Supplementary file 5 [file Table_3.xlsx]

## Sheet: Sheet1
Gene_Name	Description	FOLDS	Gene_Symbol		Representative_Public_ID	Chromosomal_Location	Probe_Set_ID	N1	N2	N3	N4	N5	T1	T2	T3	T4	T5	T6	Transcript_ID_Array_Design_	Target_Description	Representative_Public_ID	Archival_UniGene_Cluster	UniGene_ID	Alignments	Gene_Title	Gene_Symbol	Chromosomal_Location	Entrez_Gene	RefSeq_Transcript_ID	KEGG
1387835_at	TTT	53.6872	Il1rn	IL1RN	NM_022194	chr3p13	1387835_at	29.4736	5.30692	6.9699	12.1642	7.61784	1191.9	1008.38	188.157	254.361	48.6007	23.0452	Rn.44376.1	gb:NM_022194.1 /DB_XREF=gi:11559963 /GEN=Il1rn /FEA=FLmRNA /CNT=3 /TID=Rn.44376.1 /TIER=FL /STK=1 /UG=Rn.44376 /LL=60582 /DEF=Rattus norvegicus interleukin 1 receptor antagonist gene (Il1rn), mRNA. /PROD=interleukin 1 receptor antagonist gene /FL=gb:NM_022194.1	NM_022194	Rn.44376	Rn.162640	chr3:2607803-2612049 (+) // 100.0 // p13	interleukin 1 receptor antagonist	Il1rn	chr3p13	60582	NM_022194 /// XM_001071294 /// XM_001071330	---
1379497_at	TTT	29.6846	---	---	BI275261	---	1379497_at	180.261	5.31209	11.1576	184.009	265.994	5562.22	2896.32	3626.46	3273.4	89.6412	99.8411	Rn.24928.1	gb:BI275261 /DB_XREF=gi:14886936 /DB_XREF=UI-R-CX0-bwr-d-11-0-UI.s1 /CLONE=UI-R-CX0-bwr-d-11-0-UI /FEA=EST /CNT=5 /TID=Rn.24928.1 /TIER=ConsEnd /STK=2 /UG=Rn.24928 /UG_TITLE=ESTs	BI275261	---	---	---	---	---	---	0	---	---
1368760_at	TTT	24.7491	Cxcl2	CXCL2	NM_053647	chr14p22	1368760_at	270.548	8.98216	5.40674	329.335	344.363	4151.47	8930.47	1856.53	4041.79	279.68	932.664	Rn.10230.1	gb:NM_053647.1 /DB_XREF=gi:16758459 /GEN=Scyb2 /FEA=FLmRNA /CNT=4 /TID=Rn.10230.1 /TIER=FL /STK=3 /UG=Rn.10230 /LL=114105 /DEF=Rattus norvegicus small inducible cytokine subfamily, member 2 (Scyb2), mRNA. /PROD=small inducible cytokine subfamily, member 2 /FL=gb:NM_053647.1 gb:AB060092.1 gb:U45965.1	NM_053647	Rn.10230	Rn.10230	chr14:18677128-18679175 (-) // 93.82 // p22	chemokine (C-X-C motif) ligand 2	Cxcl2	chr14p22	114105	NM_053647	---
1369815_at	TTT	19.9247	Ccl3	CCL3	U22414	chr10q26	1369815_at	207.185	43.3227	29.8095	247.546	224.475	3223.1	6032.64	1109.89	1626.48	73.5401	20.9882	Rn.10139.1	gb:U22414.1 /DB_XREF=gi:790632 /FEA=FLmRNA /CNT=3 /TID=Rn.10139.1 /TIER=FL /STK=1 /UG=Rn.10139 /LL=25542 /UG_GENE=Scya3 /DEF=Rattus norvegicus macrophage inflammatory protein-1alpha mRNA, complete cds. /PROD=macrophage inflammatory protein-1alpha /FL=gb:NM_013025.1 gb:U06435.1 gb:U22414.1	U22414	Rn.10139	Rn.10139	chr10:71744558-71746109 (-) // 92.32 // q26	chemokine (C-C motif) ligand 3	Ccl3	chr10q26	25542	NM_013025	---
1387422_at	TTT	17.3201	Pglyrp1	PGLYRP1	NM_053373	chr1q21	1387422_at	8.07138	11.1441	12.0037	106.929	74.4665	622.711	1698.38	218.25	406.667	29.1881	15.2697	Rn.2834.1	gb:NM_053373.1 /DB_XREF=gi:16758103 /GEN=Pglyrp /FEA=FLmRNA /CNT=5 /TID=Rn.2834.1 /TIER=FL /STK=2 /UG=Rn.2834 /LL=84387 /DEF=Rattus norvegicus peptidoglycan recognition protein (Pglyrp), mRNA. /PROD=peptidoglycan recognition protein /FL=gb:AF154114.1 gb:NM_053373.1	NM_053373	Rn.2834	Rn.2834	chr1:78235473-78240704 (+) // 99.7 // q21	peptidoglycan recognition protein 1	Pglyrp1	chr1q21	84387	NM_053373	---
1387011_at	TTT	10.562	Lcn2	LCN2	NM_130741	chr3p11	1387011_at	295.323	235.585	2656.68	2049.59	1332.51	6833.12	30329.9	16252.1	2095.93	1528.22	1938.41	Rn.11303.1	gb:NM_130741.1 /DB_XREF=gi:18543344 /GEN=Lcn2 /FEA=FLmRNA /CNT=14 /TID=Rn.11303.1 /TIER=FL+Stack /STK=12 /UG=Rn.11303 /LL=170496 /DEF=Rattus norvegicus lipocalin 2 (Lcn2), mRNA. /PROD=lipocalin 2 /FL=gb:NM_130741.1	NM_130741	Rn.11303	Rn.11303	chr3:11511397-11514747 (-) // 100.0 // p11	lipocalin 2	Lcn2	chr3p11	170496	NM_130741	---
1387735_at	TTT	9.31313	Mmp8	MMP8	NM_022221	chr8q11	1387735_at	14.8704	29.0859	104.95	67.6534	65.7133	389.065	1280.52	169.563	263.925	37.8664	21.0799	Rn.44474.1	gb:NM_022221.1 /DB_XREF=gi:11560007 /GEN=LOC63849 /FEA=FLmRNA /CNT=2 /TID=Rn.44474.1 /TIER=FL /STK=1 /UG=Rn.44474 /LL=63849 /DEF=Rattus norvegicus neutrophil collagenease (LOC63849), mRNA. /PROD=neutrophil collagenease /FL=gb:NM_022221.1	NM_022221	Rn.44474	Rn.44474	chr8:4402123-4410976 (+) // 99.86 // q11	matrix metallopeptidase 8	Mmp8	chr8q11	63849	NM_022221	Matrix_Metalloproteinases // GenMAPP
1368521_at	TTT	8.99224	Napsa	NAPSA	NM_031670	chr1q22	1368521_at	18.1823	41.889	35.588	44.0604	189.099	649.882	912.76	386.805	416.008	21.8238	7.58046	Rn.17097.1	gb:NM_031670.1 /DB_XREF=gi:13928927 /GEN=Kdap /FEA=FLmRNA /CNT=9 /TID=Rn.17097.1 /TIER=FL /STK=4 /UG=Rn.17097 /LL=60575 /DEF=Rattus norvegicus kidney-derived aspartic protease-like protein (Kdap), mRNA. /PROD=kidney-derived aspartic protease-like protein /FL=gb:NM_031670.1	NM_031670	Rn.17097	Rn.17097	chr1:95050795-95062769 (+) // 94.88 // q22	napsin A aspartic peptidase	Napsa	chr1q22	60575	NM_031670	---
1389987_at	TTT	8.5395	Trib1	TRIB1	AI511059	chr7q33	1389987_at	4.38591	3.55891	4.73159	10.3293	7.40726	99.5464	52.2945	52.7771	3.15093	13.0359	3.09209	Rn.34615.1	gb:AI511059 /DB_XREF=gi:4416758 /DB_XREF=UI-R-C2p-od-h-05-0-UI.s1 /CLONE=UI-R-C2p-od-h-05-0-UI /FEA=EST /CNT=9 /TID=Rn.34615.1 /TIER=Stack /STK=7 /UG=Rn.34615 /UG_TITLE=ESTs	AI511059	Rn.34615	Rn.204391	chr7:96442234-96442598 (+) // 87.3 // q33	tribbles homolog 1 (Drosophila)	Trib1	chr7q33	78969	NM_023985 /// XM_001065461 /// XM_343250	---
1389986_at	TTT	8.31408	---	---	AI008409	---	1389986_at	895.72	185.623	77.2345	198.915	172.881	4555.06	1696.81	1514.7	2412.34	267.731	424.292	Rn.65864.6	gb:AI008409 /DB_XREF=gi:3222241 /DB_XREF=EST202860 /CLONE=REMAW93 /FEA=EST /CNT=9 /TID=Rn.65864.6 /TIER=Stack /STK=7 /UG=Rn.65864 /LL=85383 /UG_GENE=LOC85383 /UG_TITLE=unknown Glu-Pro dipeptide repeat protein	AI008409	Rn.65864	Rn.119131	chr1:208428218-208428646 (-) // 100.0 // q43	CDNA clone IMAGE:7321089	---	---	0	---	---
1388272_at	TTT	8.05449	Igh-1a	IGH-1A	AI411947	chr6q32	1388272_at	74.4115	132.94	725.622	161.168	203.393	3393.72	2475.64	1226	1265.42	60.2613	6.14942	Rn.968.1	gb:AI411947 /DB_XREF=gi:4255451 /DB_XREF=EST240241 /CLONE=RKIES02 /FEA=DNA /CNT=11 /TID=Rn.968.1 /TIER=Stack /STK=7 /UG=Rn.968 /UG_TITLE=Rattus norvegicus rearranged IgG-2b gene, last 4 exons	AI411947	Rn.968	Rn.202986	chr6:138287131-138288744 (-) // 99.64 // q32	immunoglobulin heavy chain 1a (serum IgG2a)	Igh-1a	chr6q32	299352	---	---
1369379_at	TTT	8.03688	Epha3	EPHA3	NM_031564	chr11p12	1369379_at	11.421	5.70986	6.29347	8.9428	2.55603	154.4	11.5713	55.2025	3.36525	7.17357	11.8309	Rn.10713.1	gb:NM_031564.1 /DB_XREF=gi:13928765 /GEN=Epha3 /FEA=FLmRNA /CNT=2 /TID=Rn.10713.1 /TIER=FL /STK=2 /UG=Rn.10713 /LL=29210 /DEF=Rattus norvegicus Eph receptor A3 (Epha3), mRNA. /PROD=Eph receptor A3 /FL=gb:NM_031564.1 gb:U69278.1	NM_031564	Rn.10713	Rn.10713	chr11:696184-1033287 (-) // 99.38 // p12	Eph receptor A3	Epha3	chr11p12	29210	NM_031564	---
1370119_at	TTT	8.02465	Lst1	LST1	NM_022634	chr20p12	1370119_at	53.5615	74.725	79.4712	123.263	132.989	965.086	1283.95	459.701	270.079	168.326	54.4446	Rn.48755.1	gb:NM_022634.1 /DB_XREF=gi:12018329 /GEN=Lst1 /FEA=FLmRNA /CNT=3 /TID=Rn.48755.1 /TIER=FL /STK=1 /UG=Rn.48755 /LL=64569 /DEF=Rattus norvegicus leucocyte specific transcript 1 (Lst1), mRNA. /PROD=leucocyte specific transcript 1 /FL=gb:AF208230.1 gb:NM_022634.1	NM_022634	Rn.48755	Rn.91085	chr20:3698567-3701564 (+) // 87.67 // p12	leucocyte specific transcript 1	Lst1	chr20p12	64569	NM_022634	---
1389512_at	TTT	7.82218	---	---	BF410571	---	1389512_at	8.35723	8.07728	19.8557	5.13224	8.7353	60.0329	44.8197	102.043	106.979	64.5978	11.7773	Rn.51497.1	gb:BF410571 /DB_XREF=gi:11398546 /DB_XREF=UI-R-CA0-bma-c-10-0-UI.s1 /CLONE=UI-R-CA0-bma-c-10-0-UI /FEA=EST /CNT=7 /TID=Rn.51497.1 /TIER=Stack /STK=7 /UG=Rn.51497 /UG_TITLE=ESTs	BF410571	Rn.51497	Rn.199834	chr8:125029710-125030122 (-) // 63.19 // q32	Transcribed locus	---	---	0	---	---
1369497_at	TTT	7.66301	LOC24906	LOC24906	NM_031537	chr10q22	1369497_at	14.4034	3.66346	26.5941	29.21	21.4874	47.3757	279.281	148.673	109.256	10.0051	45.0749	Rn.48721.1	gb:NM_031537.1 /DB_XREF=gi:14389302 /GEN=Slc11a1 /FEA=FLmRNA /CNT=2 /TID=Rn.48721.1 /TIER=FL /STK=2 /UG=Rn.48721 /LL=24906 /DEF=Rattus norvegicus Solute carrier family 11 member 1 (natural resistance-associated macrophage protein 1), see also D9Arb3 (Slc11a1), mRNA. /PROD=Solute carrier family 11 member 1 (naturalresistance-associated macrophage protein 1) /FL=gb:NM_031537.1 gb:AF041083.1	NM_031537	Rn.48721	Rn.48721	chr10:44072417-44080195 (+) // 46.36 // q22	RoBo-1	LOC24906	chr10q22	24906	NM_031537	---
1386995_at	TTT	7.38312	Btg2	BTG2	BI288701	---	1386995_at	641.485	153.924	449.11	388.606	402.764	2931.53	4652.18	2855.78	1585.47	1795.97	104.582	Rn.27923.1	gb:BI288701 /DB_XREF=gi:14945544 /DB_XREF=UI-R-DK0-cdd-h-12-0-UI.s1 /CLONE=UI-R-DK0-cdd-h-12-0-UI /FEA=FLmRNA /CNT=41 /TID=Rn.27923.1 /TIER=Stack /STK=7 /UG=Rn.27923 /LL=29619 /UG_GENE=Btg2 /UG_TITLE=B-cell translocation gene 2, anti-proliferative /FL=gb:M60921.1 gb:NM_017259.1	BI288701	Rn.27923	Rn.27923	chr13:47026963-47030745 (-) // 99.88 // q13	B-cell translocation gene 2, anti-proliferative	Btg2	---	29619	NM_017259	---
1387623_at	TTT	7.0371	Stc1	STC1	NM_031123	chr15p11	1387623_at	5.73999	6.34809	13.9406	5.86207	5.47613	85.9013	52.8272	58.7833	12.852	23.0126	13.8047	Rn.10647.1	gb:NM_031123.1 /DB_XREF=gi:13592094 /GEN=Stc1 /FEA=FLmRNA /CNT=2 /TID=Rn.10647.1 /TIER=FL /STK=2 /UG=Rn.10647 /LL=81801 /DEF=Rattus norvegicus stanniocalcin 1 (Stc1), mRNA. /PROD=stanniocalcin 1 /FL=gb:U62667.1 gb:NM_031123.1	NM_031123	Rn.10647	Rn.10647	chr15:49567033-49576246 (+) // 99.8 // p11	stanniocalcin 1	Stc1	chr15p11	81801	NM_031123	---
1375917_at	TTT	6.81452	Gp49b /// LOC499078	GP49B /// LOC499078	BF282961	chr1q12	1375917_at	113.214	80.4263	12.1158	167.514	118.476	1018.7	666.45	499.537	496.123	59.717	13.7408	Rn.24628.1	gb:BF282961 /DB_XREF=gi:11214031 /DB_XREF=EST447552 /CLONE=RGIDV57 /FEA=EST /CNT=9 /TID=Rn.24628.1 /TIER=ConsEnd /STK=5 /UG=Rn.24628 /UG_TITLE=ESTs, Moderately similar to B53434 cell surface glycoprotein gp49B form 2 precursor - mouse (M.musculus)	BF282961	Rn.24628	Rn.24628	chr1:69165371-69170791 (-) // 99.89 // q12	glycoprotein 49b /// similar to GP49B1	Gp49b /// LOC499078	chr1q12	0	NM_001013894 /// XM_001070660	---
1390000_at	TTT	6.77232	Jmjd3_predicted	JMJD3_PREDICTED	BE118720	chr10q24	1390000_at	352.326	50.886	203.84	121.606	124.975	1412.18	1371.3	941.778	899.596	464.094	161.91	Rn.41074.1	gb:BE118720 /DB_XREF=gi:8510825 /DB_XREF=UI-R-BS1-azr-h-10-0-UI.s1 /CLONE=UI-R-BS1-azr-h-10-0-UI /FEA=EST /CNT=8 /TID=Rn.41074.1 /TIER=Stack /STK=7 /UG=Rn.41074 /UG_TITLE=ESTs, Weakly similar to T42387 histocompatibility antigen H-YDb, male-specific - mouse (M.musculus)	BE118720	Rn.41074	Rn.205533	chr10:56194130-56195311 (-) // 92.79 // q24	jumonji domain containing 3 (predicted)	Jmjd3_predicted	chr10q24	363630	NM_001108829 /// XM_001079385 /// XM_343919	---
1368140_at	TTT	6.76184	Prkwnk1	PRKWNK1	AI011345	chr4q42	1368140_at	7.5112	8.37049	13.0863	5.16159	6.40891	73.8975	29.36	97.386	18.6482	33.456	20.818	Rn.18103.1	gb:AI011345 /DB_XREF=gi:3225177 /DB_XREF=EST205796 /CLONE=ROVAT65 /FEA=FLmRNA /CNT=34 /TID=Rn.18103.1 /TIER=Stack /STK=13 /UG=Rn.18103 /LL=116477 /UG_GENE=Prkwnk1 /UG_TITLE=protein kinase, lysine deficient 1 /FL=gb:AF227741.1 gb:NM_053794.1	AI011345	Rn.18103	Rn.27409	chr4:156297812-156421957 (-) // 99.26 // q42	protein kinase, lysine deficient 1	Prkwnk1	chr4q42	116477	NM_053794	---
1368754_at	TTT	6.66027	P2ry6	P2RY6	NM_057124	chr1q32	1368754_at	24.3682	14.9246	22.0295	179	63.547	625.592	282.591	369.187	341.71	29.9118	23.84	Rn.10671.1	gb:NM_057124.1 /DB_XREF=gi:16923973 /GEN=P2ry6 /FEA=FLmRNA /CNT=4 /TID=Rn.10671.1 /TIER=FL /STK=3 /UG=Rn.10671 /LL=117264 /DEF=Rattus norvegicus pyrimidinergic receptor P2Y, G-protein coupled, 6 (P2ry6), mRNA. /PROD=pyrimidinergic receptor P2Y, G-protein coupled,6 /FL=gb:NM_057124.1 gb:D63665.1	NM_057124	Rn.10671	Rn.10671	chr1:158381887-158417333 (-) // 93.16 // q32	pyrimidinergic receptor P2Y, G-protein coupled, 6	P2ry6	chr1q32	117264	NM_057124	Nucleotide_GPCRs // GenMAPP
1388061_a_at	TTT	6.43796	Epha7	EPHA7	U21955	chr5q21	1388061_a_at	8.11486	3.86481	12.3508	4.1665	7.50173	95.7557	51.6979	30.753	7.19979	44.4176	6.20145	Rn.10181.2	gb:U21955.1 /DB_XREF=gi:755569 /FEA=FLmRNA /CNT=1 /TID=Rn.10181.2 /TIER=FL /STK=1 /UG=Rn.10181 /LL=171287 /UG_GENE=Epha7 /DEF=Rattus norvegicus tyrosine kinase receptor Ehk-3, truncated form, mRNA, complete cds. /PROD=Ehk-3, truncated form /FL=gb:U21955.1	U21955	Rn.10181	Rn.10181	chr5:44728036-44861711 (+) // 100.0 // q21	Eph receptor A7	Epha7	chr5q21	171287	NM_134331	---
1368604_at	TTT	6.13939	Mefv	MEFV	NM_031634	chr10q12	1368604_at	16.3948	19.3706	16.5174	100.873	13.1515	175.509	266.441	122.785	252.084	21.1052	9.35416	Rn.29105.1	gb:NM_031634.1 /DB_XREF=gi:13928875 /GEN=Mefv /FEA=FLmRNA /CNT=5 /TID=Rn.29105.1 /TIER=FL /STK=4 /UG=Rn.29105 /LL=58923 /DEF=Rattus norvegicus Mediterranean fever (Mefv), mRNA. /PROD=Mediterranean fever /FL=gb:AF143410.1 gb:NM_031634.1	NM_031634	Rn.29105	Rn.29105	chr10:12059820-12069342 (+) // 90.47 // q12	Mediterranean fever	Mefv	chr10q12	58923	NM_031634	---
1377861_at	TTT	6.11926	---	---	AI011151	---	1377861_at	6.09215	4.23649	10.6362	7.70761	12.5144	37.2196	16.7481	74.1526	73.5056	14.9926	8.88184	Rn.40264.2	gb:AI011151 /DB_XREF=gi:3224983 /DB_XREF=EST205602 /CLONE=ROVAQ18 /FEA=EST /CNT=5 /TID=Rn.40264.2 /TIER=ConsEnd /STK=3 /UG=Rn.40264 /UG_TITLE=ESTs	AI011151	---	---	chr2:212083311-212084049 (+) // 85.03 // q41	---	---	---	0	---	---
1392731_at	TTT	5.93915	Tnfrsf1b	TNFRSF1B	BM390522	chr5q36	1392731_at	11.4608	9.3763	71.5021	34.9059	13.0775	170.356	234.281	96.0036	166.078	7.64278	5.72075	Rn.32448.1	gb:BM390522 /DB_XREF=gi:18190575 /DB_XREF=UI-R-CN1-cjr-a-09-0-UI.s1 /CLONE=UI-R-CN1-cjr-a-09-0-UI /FEA=EST /CNT=3 /TID=Rn.32448.1 /TIER=ConsEnd /STK=1 /UG=Rn.32448 /UG_TITLE=ESTs	BM390522	Rn.32448	Rn.83633	chr5:163666547-163667152 (-) // 99.83 // q36	tumor necrosis factor receptor superfamily, member 1b	Tnfrsf1b	chr5q36	156767	NM_130426	Apoptosis // GenMAPP /// Apoptosis // GenMAPP /// Apoptosis // GenMAPP /// Apoptosis // GenMAPP /// Apoptosis_GenMAPP // GenMAPP /// Apoptosis_GenMAPP // GenMAPP /// Apoptosis_GenMAPP // GenMAPP /// Apoptosis_GenMAPP // GenMAPP /// Apoptosis_KEGG // GenMAPP /// Apoptosis_KEGG // GenMAPP /// Apoptosis_KEGG // GenMAPP /// Apoptosis_KEGG // GenMAPP /// Inflammatory_Response_Pathway // GenMAPP /// In…
1375757_at	TTT	5.90313	Cdk6	CDK6	BE111764	chr4q13	1375757_at	6.01352	2.7152	11.4162	9.9395	3.76144	5.69295	30.0743	67.8071	56.2628	12.0155	11.475	Rn.49038.1	gb:BE111764 /DB_XREF=gi:8503869 /DB_XREF=UI-R-BJ1-avx-e-09-0-UI.s1 /CLONE=UI-R-BJ1-avx-e-09-0-UI /FEA=EST /CNT=7 /TID=Rn.49038.1 /TIER=Stack /STK=6 /UG=Rn.49038 /UG_TITLE=ESTs, Moderately similar to cyclin-dependent kinase 4 (Rattus norvegicus) (R.norvegicus)	BE111764	Rn.49038	Rn.162731	chr4:27453662-27617899 (+) // 100.0 // q13	Cyclin-dependent kinase 6	Cdk6	chr4q13	114483	XM_001068770 /// XM_342638	Cell_cycle_KEGG // GenMAPP /// G1_to_S_cell_cycle_Reactome // GenMAPP
1369512_at	TTT	5.70687	Chst3	CHST3	NM_053408	chr20q11	1369512_at	3.82257	3.35294	6.54334	4.45641	3.73491	8.79149	14.4225	27.6848	49.132	15.9649	5.07389	Rn.64646.1	gb:NM_053408.1 /DB_XREF=gi:16758141 /GEN=Chst3 /FEA=FLmRNA /CNT=2 /TID=Rn.64646.1 /TIER=FL /STK=2 /UG=Rn.64646 /LL=84468 /DEF=Rattus norvegicus carbohydrate (chondroitin 6keratan) sulfotransferase 3 (Chst3), mRNA. /PROD=carbohydrate (chondroitin 6keratan)sulfotransferase 3 /FL=gb:AF178689.2 gb:NM_053408.1	NM_053408	Rn.64646	Rn.64646	chr20:27480447-27482990 (-) // 99.65 // q11	carbohydrate (chondroitin 6/keratan) sulfotransferase 3	Chst3	chr20q11	84468	NM_053408	---
1374002_at	TTT	5.50607	---	---	AI045904	---	1374002_at	310.902	140.038	140.878	93.0235	163.104	1060.75	1032.2	892.206	749.924	744.572	244.397	Rn.18346.1	gb:AI045904 /DB_XREF=gi:3292723 /DB_XREF=UI-R-C0-jq-f-05-0-UI.s2 /CLONE=UI-R-C0-jq-f-05-0-UI /FEA=EST /CNT=9 /TID=Rn.18346.1 /TIER=Stack /STK=7 /UG=Rn.18346 /UG_TITLE=ESTs	AI045904	---	---	chr7:51878531-51879219 (-) // 99.27 // q21	---	---	---	0	---	---
1367850_at	TTT	5.12736	Fcgr3	FCGR3	NM_053843	chr13q24	1367850_at	516.037	664.656	601.703	1284.11	1193.48	4238.21	6680.45	2725.61	3829.75	1136.63	740.004	Rn.6050.1	gb:NM_053843.1 /DB_XREF=gi:16758699 /GEN=Fcgr3 /FEA=FLmRNA /CNT=21 /TID=Rn.6050.1 /TIER=FL+Stack /STK=15 /UG=Rn.6050 /LL=116591 /DEF=Rattus norvegicus Fc receptor, IgG, low affinity III (Fcgr3), mRNA. /PROD=Fc receptor, IgG, low affinity III /FL=gb:NM_053843.1 gb:M64370.1 gb:M64368.1 gb:M64369.1 gb:M32062.1	NM_053843	Rn.6050	Rn.6050	chr13:86920622-86955560 (-) // 81.73 // q24 /// chr13:86898524-86913533 (-) // 75.41 // q24 /// chr13:86815051-86929721 (-) // 40.74 // q24	Fc receptor, IgG, low affinity III	Fcgr3	chr13q24	116591	NM_053843 /// XM_001077008	---
1369651_at	TTT	5.07728	Thy1	THY1	NM_012673	chr8q22	1369651_at	175.302	98.0056	203.972	227.228	168.757	1512.3	585.371	887.231	562.15	80.3889	20.0076	Rn.34356.1	gb:NM_012673.1 /DB_XREF=gi:6981653 /GEN=Thy1 /FEA=FLmRNA /CNT=20 /TID=Rn.34356.1 /TIER=FL /STK=1 /UG=Rn.34356 /LL=24832 /DEF=Rattus norvegicus Thymus cell surface antigen (Thy1), mRNA. /PROD=thymus cell surface antigen /FL=gb:NM_012673.1	NM_012673	Rn.34356	Rn.108198	chr8:47027693-47032823 (+) // 99.45 // q22	thymus cell antigen 1, theta	Thy1	chr8q22	24832	NM_012673	---
1375707_at	TTT	5.07513	---	---	AA817993	---	1375707_at	93.9137	16.5639	84.1744	27.7279	56.2882	79.6741	203.316	528.544	319.888	40.0448	20.2106	Rn.22502.1	gb:AA817993 /DB_XREF=gi:4198516 /DB_XREF=UI-R-A0-ah-b-02-0-UI.s1 /CLONE=UI-R-A0-ah-b-02-0-UI /FEA=EST /CNT=8 /TID=Rn.22502.1 /TIER=Stack /STK=6 /UG=Rn.22502 /UG_TITLE=ESTs, Moderately similar to A53798 58K membrane-associated protein - rat (R.norvegicus)	AA817993	---	---	---	---	---	---	0	---	---
1368867_at	TTT	4.94605	Eif2c2	EIF2C2	BF281131	chr7q34	1368867_at	205.859	59.3851	90.7817	109.533	172.88	698.806	611.716	526.702	688.973	344.404	238.344	Rn.35512.1	gb:BF281131 /DB_XREF=gi:11212285 /DB_XREF=EST445806 /CLONE=RGIAB46 /FEA=FLmRNA /CNT=19 /TID=Rn.35512.1 /TIER=Stack /STK=8 /UG=Rn.35512 /LL=59117 /UG_GENE=Gerp95 /UG_TITLE=GERp95 /FL=gb:NM_021597.1 gb:AF195534.1	BF281131	Rn.35512	Rn.35512	chr7:110827206-110865589 (-) // 98.6 // q34	eukaryotic translation initiation factor 2C, 2	Eif2c2	chr7q34	59117	NM_021597	---
1369027_at	TTT	4.69458	A4galt	A4GALT	NM_022240	chr7q34	1369027_at	8.97417	5.7181	8.42112	14.2402	9.42818	14.156	18.9227	48.5846	94.0336	15.8201	10.8794	Rn.48584.1	gb:NM_022240.1 /DB_XREF=gi:11560037 /GEN=Gb3 /FEA=FLmRNA /CNT=5 /TID=Rn.48584.1 /TIER=FL /STK=2 /UG=Rn.48584 /LL=63888 /DEF=Rattus norvegicus Gb3 synthase (Gb3), mRNA. /PROD=Gb3 synthase /FL=gb:AF248544.1 gb:NM_022240.1	NM_022240	Rn.48584	Rn.48584	chr7:121252122-121253755 (-) // 97.08 // q34	alpha 1,4-galactosyltransferase	A4galt	chr7q34	63888	NM_022240	---
1373536_at	TTT	4.69432	---	---	AW525196	---	1373536_at	732.367	731.603	944.129	836.629	929.013	3858.47	4933.45	3234.26	3648.12	367.314	459.502	Rn.15245.1	gb:AW525196 /DB_XREF=gi:7167581 /DB_XREF=UI-R-BJ0p-aio-h-09-0-UI.s1 /CLONE=UI-R-BJ0p-aio-h-09-0-UI /FEA=EST /CNT=10 /TID=Rn.15245.1 /TIER=Stack /STK=8 /UG=Rn.15245 /UG_TITLE=ESTs	AW525196	---	---	chr13:2801453-2801966 (-) // 3.02 // p13 /// chr4:20329705-20330207 (-) // 4.59 // q12	---	---	---	0	---	---
1367762_at	TTT	4.65685	Sst	SST	NM_012659	chr11q23	1367762_at	23.197	9.55495	54.3033	149.618	23.4835	279.184	177.316	249.561	263.145	38.0042	27.256	Rn.34418.1	gb:NM_012659.1 /DB_XREF=gi:6981581 /GEN=Sst /FEA=FLmRNA /CNT=27 /TID=Rn.34418.1 /TIER=FL+Stack /STK=18 /UG=Rn.34418 /LL=24797 /DEF=Rattus norvegicus Somatostatin (Sst), mRNA. /PROD=somatostatin /FL=gb:NM_012659.1 gb:M25890.1	NM_012659	Rn.34418	Rn.34418	chr11:79124940-79126216 (+) // 97.32 // q23	somatostatin	Sst	chr11q23	24797	NM_012659	---
1388166_at	TTT	4.58655	LOC299458 /// LOC366747 /// LOC678701 /// RGD1359202	LOC299458 /// LOC366747 /// LOC678701 /// RGD1359202	AI411693	chr6q32 /// chr6q33	1388166_at	187.069	162.146	113.035	185.541	336.402	959.303	654.098	477.484	1520.36	84.1904	32.3409	Rn.4149.1	gb:AI411693 /DB_XREF=gi:4255197 /DB_XREF=EST239987 /CLONE=ROVEM18 /FEA=mRNA /CNT=15 /TID=Rn.4149.1 /TIER=ConsEnd /STK=4 /UG=Rn.4149 /UG_TITLE=R.norvegicus mRNA for Ig rearranged mu-chain C region, exons 2-4	AI411693	Rn.4149	Rn.201760	chr6:138442283-138443829 (-) // 97.41 // q32	similar to immunoglobulin heavy chain 6 (Igh-6) /// similar to Ig H-chain V-region precursor /// similar to Ig heavy chain V region MC101 precursor /// hypothetical protein LOC678701	LOC299458 /// LOC366747 /// LOC678701 /// RGD1359202	chr6q32 /// chr6q33	0	XM_001053002	---
1369766_at	TTT	4.54876	Ptger2	PTGER2	U48858	chr15p14	1369766_at	9.30046	7.64605	9.85113	7.70663	8.15605	68.5813	9.57753	69.6023	7.48021	8.81032	9.13683	Rn.10264.1	gb:U48858.1 /DB_XREF=gi:1236076 /FEA=FLmRNA /CNT=4 /TID=Rn.10264.1 /TIER=FL /STK=1 /UG=Rn.10264 /LL=81752 /UG_GENE=Ptger2 /DEF=Rattus norvegicus prostaglandin E receptor EP2 subtype mRNA, complete cds. /PROD=prostaglandin E receptor EP2 subtype /FL=gb:U48858.1 gb:U94708.1 gb:NM_031088.1	U48858	Rn.10264	Rn.10264	chr15:20878018-20889615 (+) // 99.23 // p14 /// chr15:20205376-20216872 (+) // 99.23 // p14	prostaglandin E receptor 2, subtype EP2	Ptger2	chr15p14	81752	NM_031088	GPCRDB_Class_A_Rhodopsin-like // GenMAPP /// Prostaglandin_synthesis_regulation // GenMAPP /// Small_ligand_GPCRs // GenMAPP
1387412_at	TTT	4.40065	Pip5k2a	PIP5K2A	NM_053926	chr17q12.3	1387412_at	169.11	89.3601	96.3204	279.408	117.185	705.569	626.242	558.187	755.259	359.073	235.456	Rn.24177.1	gb:NM_053926.1 /DB_XREF=gi:16758973 /GEN=Pip5k2a /FEA=FLmRNA /CNT=6 /TID=Rn.24177.1 /TIER=FL /STK=2 /UG=Rn.24177 /LL=116723 /DEF=Rattus norvegicus phosphatidylinositol-4-phosphate 5-kinase, type II, alpha (Pip5k2a), mRNA. /PROD=phosphatidylinositol-4-phosphate 5-kinase, typeII, alpha /FL=gb:NM_053926.1 gb:AB032899.1	NM_053926	Rn.24177	Rn.24177	chr17:92952164-93111944 (-) // 67.5 // q12.3	phosphatidylinositol-4-phosphate 5-kinase, type II, alpha	Pip5k2a	chr17q12.3	116723	NM_053926	G13_Signaling_Pathway // GenMAPP
1368301_at	TTT	4.38758	Adora2a	ADORA2A	AF228684	chr20p12	1368301_at	7.34949	6.05513	7.23654	7.02168	5.66803	47.7942	29.5233	32.9228	6.75331	13.0844	16.2653	Rn.11180.1	gb:AF228684.1 /DB_XREF=gi:7407132 /FEA=FLmRNA /CNT=14 /TID=Rn.11180.1 /TIER=FL /STK=1 /UG=Rn.11180 /LL=25369 /UG_GENE=Adora2a /DEF=Rattus norvegicus A2A adenosine receptor mRNA, complete cds. /PROD=A2A adenosine receptor /FL=gb:AF228684.1 gb:NM_053294.2 gb:M91214.1	AF228684	Rn.11180	Rn.11180	chr20:13815717-13825618 (-) // 95.5 // p12	adenosine A2a receptor	Adora2a	chr20p12	25369	NM_053294	GPCRDB_Class_A_Rhodopsin-like // GenMAPP /// GPCRDB_Class_A_Rhodopsin-like // GenMAPP /// Nucleotide_GPCRs // GenMAPP /// Nucleotide_GPCRs // GenMAPP
1368693_at	TTT	4.26637	Fgr	FGR	NM_024145	chr5q36	1368693_at	91.7231	101.854	128.964	166.546	188.38	1059.19	563.704	381.114	308.247	95.3201	85.7852	Rn.11309.1	gb:NM_024145.1 /DB_XREF=gi:13162330 /GEN=Fgr /FEA=FLmRNA /CNT=5 /TID=Rn.11309.1 /TIER=FL /STK=3 /UG=Rn.11309 /LL=79113 /DEF=Rattus norvegicus FGR (Fgr), mRNA. /PROD=FGR /FL=gb:NM_024145.1	NM_024145	Rn.11309	Rn.11309	chr5:152119700-152137595 (-) // 99.59 // q36	Gardner-Rasheed feline sarcoma viral (Fgr) oncogene homolog	Fgr	chr5q36	79113	NM_024145	---
1387692_a_at	TTT	4.05453	Sstr1	SSTR1	M97656	chr6q23	1387692_a_at	8.82026	4.38337	9.15378	11.4132	8.80713	57.812	14.4419	55.2036	10.6484	15.6341	11.9161	Rn.42915.1	gb:M97656.1 /DB_XREF=gi:207062 /FEA=FLmRNA /CNT=5 /TID=Rn.42915.1 /TIER=FL /STK=1 /UG=Rn.42915 /LL=25033 /UG_GENE=Sstr1 /DEF=Rattus norvegicus somatostatin receptor mRNA, complete cds. /PROD=somatostatin receptor /FL=gb:NM_012719.1 gb:M97656.1	M97656	Rn.42915	Rn.42915	chr6:78803392-78806983 (+) // 96.44 // q23	somatostatin receptor 1	Sstr1	chr6q23	25033	NM_012719	GPCRDB_Class_A_Rhodopsin-like // GenMAPP /// GPCRDB_Class_A_Rhodopsin-like // GenMAPP /// Peptide_GPCRs // GenMAPP /// Peptide_GPCRs // GenMAPP
1369697_at	TTT	3.9758	Il8rb	IL8RB	NM_017183	chr9q33	1369697_at	60.1559	115.487	112.425	76.1468	115.901	327.975	734.284	240.251	224.565	45.0311	41.2678	Rn.42916.1	gb:NM_017183.1 /DB_XREF=gi:8393599 /GEN=Il8rb /FEA=FLmRNA /CNT=6 /TID=Rn.42916.1 /TIER=FL /STK=1 /UG=Rn.42916 /LL=29385 /DEF=Rattus norvegicus Interleukin 8 receptor beta (Il8rb), mRNA. /PROD=Interleukin 8 receptor beta /FL=gb:NM_017183.1	NM_017183	Rn.42916	Rn.90347	chr9:73470942-73478182 (+) // 92.49 // q33	interleukin 8 receptor, beta	Il8rb	chr9q33	29385	NM_017183	GPCRDB_Class_A_Rhodopsin-like // GenMAPP /// Peptide_GPCRs // GenMAPP
1376779_at	TTT	3.93855	Foxo1a	FOXO1A	BI295511	chr2q26	1376779_at	438.855	36.9049	103.176	87.9932	122.413	588.986	832.139	378.017	687.949	27.1596	72.1859	Rn.63821.1	gb:BI295511 /DB_XREF=gi:14959022 /DB_XREF=UI-R-DK0-cev-c-01-0-UI.s1 /CLONE=UI-R-DK0-cev-c-01-0-UI /FEA=EST /CNT=6 /TID=Rn.63821.1 /TIER=ConsEnd /STK=4 /UG=Rn.63821 /UG_TITLE=ESTs, Highly similar to FXO1 MOUSE FORKHEAD PROTEIN O1A (M.musculus)	BI295511	Rn.63821	Rn.116108	chr2:141201763-141203047 (+) // 97.36 // q26	forkhead box O1A	Foxo1a	chr2q26	84482	XM_001056726 /// XM_342244	---
1371394_x_at	TTT	3.84546	---	---	BG664827	---	1371394_x_at	121.776	36.9545	39.3362	21.4575	59.8732	87.8852	279.416	247.172	245.056	28.0804	30.0842	Rn.37537.1	gb:BG664827 /DB_XREF=gi:13886749 /DB_XREF=DRABLH09 /CLONE=DRABLH09 /FEA=EST /CNT=36 /TID=Rn.37537.1 /TIER=Stack /STK=28 /UG=Rn.37537 /UG_TITLE=ESTs, Weakly similar to POL3 MOUSE RETROVIRUS-RELATED POL POLYPROTEIN (M.musculus)	BG664827	---	---	---	---	---	---	0	---	---
1375535_at	TTT	3.84478	---	---	AI103917	---	1375535_at	1505.21	239.987	494.53	379.897	517.016	3196.92	2135.14	1802.87	2512.84	240.055	112.781	Rn.6069.1	gb:AI103917 /DB_XREF=gi:3704869 /DB_XREF=EST213206 /CLONE=RHEBV13 /FEA=EST /CNT=12 /TID=Rn.6069.1 /TIER=Stack /STK=7 /UG=Rn.6069 /UG_TITLE=ESTs	AI103917	Rn.6069	Rn.136450	chrX:91459086-91459560 (-) // 60.73 // q31	Transcribed locus	---	---	0	---	---
1376871_at	TTT	3.73224	LOC363894 /// LOC680910 /// LOC681196 /// LOC684856 /// LOC685030 /// LOC685048 /// LOC685111 /// LOC685157 /// LOC685305 /// LOC685438 /// LOC686387 /// LOC686848 /// LOC686864 /// LOC686899 /// RGD1559588_predicted /// RGD1559677_predicted /// RGD1561143_predicted /// RGD1561730_predicted /// RGD1562525_predicted /// RGD1563400_predicted /// RGD1566006_predicted	LOC363894 /// LOC680910 /// LOC681196 /// LOC684856 /// LOC685030 /// LOC685048 /// LOC685111 /// LOC685157 /// LOC685305 /// LOC685438 /// LOC686387 /// LOC686848 /// LOC686864 /// LOC686899 /// RGD1559588_PREDICTED /// RGD1559677_PREDICTED /// RGD1561143_PREDICTED /// RGD1561730_PREDICTED /// RGD1562525_PREDICTED /// RGD1563400_PREDICTED /// RGD1566006_PREDICTED	AA891475	chr12q11 /// chr12q12	1376871_at	129.689	143.174	204.172	273.5	203.982	754.379	1074.5	529.723	491.386	137.893	140.909	Rn.3456.1	gb:AA891475 /DB_XREF=gi:3018354 /DB_XREF=EST195278 /CLONE=RHEAU83 /FEA=EST /CNT=7 /TID=Rn.3456.1 /TIER=ConsEnd /STK=4 /UG=Rn.3456 /UG_TITLE=ESTs	AA891475	Rn.3456	Rn.154833	chr12:19904639-20626063 (+) // 94.94 // q12 /// chr12:20307991-20436614 (-) // 91.43 // q12	similar to cell surface receptor FDFACT (predicted) /// similar to paired immunoglobin-like type 2 receptor beta (predicted) /// similar to paired immunoglobin-like type 2 receptor beta	LOC363894 /// LOC680910 /// LOC681196 /// LOC684856 /// LOC685030 /// LOC685048 /// LOC685111 /// LOC685157 /// LOC685305 /// LOC685438 /// LOC686387 /// LOC686848 /// LOC686864 /// LOC686899 /// RGD1559588_predicted /// RGD1559677_predicted /// RGD1561143_predicted /// RGD1561730_predicted /// RGD1562525_predicted /// RGD1563400_predicted /// RGD1566006_predicted	chr12q11 /// chr12q12	0	XM_001059427 /// XM_001060713 /// XM_001062010 /// XM_001062063 /// XM_001062357 /// XM_001062594 /// XM_001063237 /// XM_001063789 /// XM_001069830 /// XM_001073900 /// XM_001075881 /// XM_001076037 /// XM_001076102 /// XM_001076227 /// XM_001076251 /// XM_221990 /// XM_222031 /// XM_341045 /// XM_344088 /// XM_344092 /// XM_344096 /// XM_573384 /// XM_577240 /// XR_008800 /// XR_009052	---
1370110_at	TTT	3.71855	Kcnk4	KCNK4	NM_053804	chr1q43	1370110_at	9.6985	4.08315	17.9438	44.7262	5.60968	17.6447	93.0301	59.258	74.1863	10.36	46.1817	Rn.46453.1	gb:NM_053804.2 /DB_XREF=gi:18034770 /GEN=Kcnk4 /FEA=FLmRNA /CNT=5 /TID=Rn.46453.1 /TIER=FL /STK=1 /UG=Rn.46453 /LL=116489 /DEF=Rattus norvegicus potassium inwardly-rectifying channel, subfamily K, member 4 (Kcnk4), mRNA. /PROD=potassium inwardly-rectifying channel, subfamilyK, member 4 /FL=gb:NM_053804.2 gb:AF302842.2	NM_053804	Rn.46453	Rn.46453	chr1:209601952-209608521 (-) // 97.21 // q43	potassium channel, subfamily K, member 4	Kcnk4	chr1q43	116489	NM_053804	---
1388972_at	TTT	3.71625	Rtn4r	RTN4R	BF386649	chr11q23	1388972_at	11.4401	3.1782	30.4977	7.63093	15.4006	112.715	8.19635	63.7814	17.9103	56.6336	7.54648	Rn.45686.2	gb:BF386649 /DB_XREF=gi:11371473 /DB_XREF=UI-R-CA1-bbf-h-05-0-UI.s1 /CLONE=UI-R-CA1-bbf-h-05-0-UI /FEA=EST /CNT=10 /TID=Rn.45686.2 /TIER=Stack /STK=10 /UG=Rn.45686 /LL=113912 /UG_GENE=Rtn4r /UG_TITLE=reticulon 4 receptor	BF386649	Rn.45686	Rn.45686	chr11:84838807-84839152 (-) // 95.04 // q23	reticulon 4 receptor	Rtn4r	chr11q23	113912	NM_053613	---
1369029_at	TTT	3.7125	Plscr1	PLSCR1	NM_057194	chr8q31	1369029_at	116.394	81.8827	220.002	235.813	307.156	709.352	1281.19	478.897	385.471	305.763	367.385	Rn.35796.1	gb:NM_057194.1 /DB_XREF=gi:17105345 /GEN=Plscr1 /FEA=FLmRNA /CNT=5 /TID=Rn.35796.1 /TIER=FL /STK=2 /UG=Rn.35796 /LL=117540 /DEF=Rattus norvegicus phospholipid scramblase 1 (Plscr1), mRNA. /PROD=phospholipid scramblase 1 /FL=gb:AY024347.1 gb:NM_057194.1	NM_057194	Rn.35796	Rn.96807	chr8:97206387-97226724 (+) // 95.47 // q31	phospholipid scramblase 1	Plscr1	chr8q31	117540	NM_057194	---
1373504_at	TTT	3.5943	Glipr1	GLIPR1	BF287967	chr7q21	1373504_at	322.655	351.633	300.716	577.505	587.412	2028.81	1608.47	1063.82	1452.11	719.329	521.254	Rn.1203.1	gb:BF287967 /DB_XREF=gi:11219037 /DB_XREF=EST452558 /CLONE=RGIGN17 /FEA=EST /CNT=19 /TID=Rn.1203.1 /TIER=Stack /STK=8 /UG=Rn.1203 /UG_TITLE=ESTs, Weakly similar to JE0204 testicular protein Tpx-1 - rat (R.norvegicus)	BF287967	Rn.1203	Rn.65764	chr7:51081711-51092712 (-) // 92.15 // q21	GLI pathogenesis-related 1 (glioma)	Glipr1	chr7q21	299783	NM_001011987	---
1375389_at	TTT	3.56611	Shox2	SHOX2	AI103639	chr2q31	1375389_at	11.4536	9.30791	24.5972	12.0087	65.1711	97.7664	156.763	35.8712	59.1876	26.3849	16.1149	Rn.11258.2	gb:AI103639 /DB_XREF=gi:3708166 /DB_XREF=EST212928 /CLONE=REMCE58 /FEA=EST /CNT=9 /TID=Rn.11258.2 /TIER=Stack /STK=9 /UG=Rn.11258 /LL=25546 /UG_GENE=Shox2 /UG_TITLE=Short stature homeobox 2	AI103639	Rn.11258	Rn.11258	chr2:156881318-156881918 (+) // 98.68 // q31	Short stature homeobox 2	Shox2	chr2q31	25546	NM_013028	---
1368187_at	TTT	3.53157	Gpnmb	GPNMB	NM_133298	chr4q24	1368187_at	2340.12	1019.45	616.729	2025.03	1762.69	6530.33	7383.5	4326.51	3694.95	2578.97	2047.78	Rn.13778.1	gb:NM_133298.1 /DB_XREF=gi:18959233 /GEN=Gpnmb /FEA=FLmRNA /CNT=12 /TID=Rn.13778.1 /TIER=FL+Stack /STK=8 /UG=Rn.13778 /LL=113955 /DEF=Rattus norvegicus glycoprotein (transmembrane) nmb (Gpnmb), mRNA. /PROD=glycoprotein (transmembrane) nmb /FL=gb:NM_133298.1 gb:AF184983.2	NM_133298	Rn.13778	Rn.13778	chr4:77161351-77182624 (+) // 96.6 // q24	glycoprotein (transmembrane) nmb	Gpnmb	chr4q24	113955	NM_133298	---
1374429_at	TTT	3.51709	---	---	AI598401	---	1374429_at	1070.77	532.317	833.027	882.07	905.457	3008.59	4369.38	1832.74	2673.26	1742.63	631.828	Rn.7368.1	gb:AI598401 /DB_XREF=gi:4607449 /DB_XREF=EST250104 /CLONE=REMDQ68 /FEA=EST /CNT=13 /TID=Rn.7368.1 /TIER=Stack /STK=6 /UG=Rn.7368 /UG_TITLE=ESTs, Moderately similar to PIM1 RAT PROTO-ONCOGENE SERINETHREONINE-PROTEIN KINASE PIM-1 (R.norvegicus)	AI598401	Rn.7368	Rn.129615	chr20:7822324-7822818 (-) // 79.75 // p12	Transcribed locus	---	---	0	---	---
1383426_at	TTT	3.47371	Pstpip1_predicted	PSTPIP1_PREDICTED	BI290159	chr8q24	1383426_at	99.3152	80.6403	102.67	145.321	321.236	984.677	546.747	312.777	237.753	55.3394	70.2391	Rn.6937.1	gb:BI290159 /DB_XREF=gi:14948470 /DB_XREF=UI-R-DK0-cfs-g-12-0-UI.s1 /CLONE=UI-R-DK0-cfs-g-12-0-UI /FEA=EST /CNT=6 /TID=Rn.6937.1 /TIER=ConsEnd /STK=0 /UG=Rn.6937 /UG_TITLE=ESTs, Weakly similar to GAS7_RAT GROWTH-ARREST-SPECIFIC PROTEIN 7 (GAS-7) (R.norvegicus)	BI290159	Rn.6937	Rn.6937	chr8:59731296-59732474 (+) // 95.62 // q24	proline-serine-threonine phosphatase-interacting protein 1 (predicted)	Pstpip1_predicted	chr8q24	300732	NM_001106824 /// XM_001070448 /// XM_217152	---
1376627_at	TTT	3.38963	---	---	BF550404	---	1376627_at	385.68	210.621	439.867	161.276	194.597	400.229	1437.39	1065.86	871.326	156.039	257.481	Rn.24621.1	gb:BF550404 /DB_XREF=gi:11660134 /DB_XREF=UI-R-A1-eg-c-09-0-UI.r1 /CLONE=UI-R-A1-eg-c-09-0-UI /FEA=EST /CNT=9 /TID=Rn.24621.1 /TIER=ConsEnd /STK=4 /UG=Rn.24621 /UG_TITLE=ESTs	BF550404	Rn.24621	Rn.24621	chr4:32935299-32936904 (+) // 74.15 // q21	Transcribed locus	---	---	0	---	---
1375094_at	TTT	3.36427	Cd200	CD200	BF406208	chr11q21-q22	1375094_at	4.54743	7.03275	8.43343	3.42504	4.07589	27.1226	22.032	19.0321	5.86639	9.94557	6.93615	Rn.7085.2	gb:BF406208 /DB_XREF=gi:11394178 /DB_XREF=UI-R-CA1-bjf-c-12-0-UI.s1 /CLONE=UI-R-CA1-bjf-c-12-0-UI /FEA=EST /CNT=6 /TID=Rn.7085.2 /TIER=Stack /STK=6 /UG=Rn.7085 /LL=24560 /UG_GENE=Mox2 /UG_TITLE=Cell surface protein (thymocyte, antigen identified by monoclonal antibody MRC-OX2	BF406208	Rn.7085	Rn.7085	chr11:56978839-56979003 (+) // 100.0 // q21	Cd200 antigen	Cd200	chr11q21-q22	24560	NM_031518 /// XM_001066772	---
1387006_at	TTT	3.3239	Smp2a	SMP2A	NM_012695	chr1q21	1387006_at	3.34061	4.15945	16.2384	7.86065	11.2326	29.6749	66.0676	10.3835	7.76884	6.74349	12.8972	Rn.40124.1	gb:NM_012695.1 /DB_XREF=gi:6981565 /GEN=Smp2a /FEA=FLmRNA /CNT=14 /TID=Rn.40124.1 /TIER=FL+Stack /STK=12 /UG=Rn.40124 /LL=24902 /DEF=Rattus norvegicus Rat senescence marker protein 2A gene, exons 1 and 2 (Smp2a), mRNA. /PROD=rat senescence marker protein 2A gene, exons 1and 2 /FL=gb:M33329.1 gb:NM_012695.1	NM_012695	Rn.40124	Rn.92406	chr1:74553798-74605247 (-) // 98.33 // q21 /// chr1:75488439-75708022 (-) // 91.64 // q21	rat senescence marker protein 2A gene, exons 1 and 2	Smp2a	chr1q21	24902	NM_012695	---
1374684_at	TTT	3.27556	---	---	AI228978	---	1374684_at	1233.52	309.118	872.577	515.917	776.469	2256.04	2248.53	2307.82	2903.17	359.908	100.985	Rn.16704.1	gb:AI228978 /DB_XREF=gi:3812865 /DB_XREF=EST225673 /CLONE=RBRDC46 /FEA=EST /CNT=8 /TID=Rn.16704.1 /TIER=Stack /STK=6 /UG=Rn.16704 /UG_TITLE=ESTs	AI228978	Rn.16704	Rn.16704	chrX:91448727-91449152 (-) // 94.65 // q31	Transcribed locus	---	---	0	---	---
1370185_at	TTT	3.2505	Cntnap1	CNTNAP1	BF392830	chr10q32.1	1370185_at	14.3069	9.3769	9.17471	18.9274	8.42761	59.1593	13.23	78.482	5.70796	14.4304	14.6649	Rn.10703.1	gb:BF392830 /DB_XREF=gi:11377689 /DB_XREF=UI-R-CA0-bfo-g-06-0-UI.s1 /CLONE=UI-R-CA0-bfo-g-06-0-UI /FEA=FLmRNA /CNT=34 /TID=Rn.10703.1 /TIER=Stack /STK=8 /UG=Rn.10703 /LL=84008 /UG_GENE=Cntnap1 /UG_TITLE=contactin associated protein 1 /FL=gb:U87224.1 gb:AF000114.1 gb:NM_032061.1	BF392830	Rn.10703	Rn.88654	chr10:90198189-90210832 (+) // 91.79 // q32.1	contactin associated protein 1	Cntnap1	chr10q32.1	84008	NM_032061 /// XM_001081472	---
1370080_at	TTT	3.18282	Hmox1	HMOX1	NM_012580	chr19p11	1370080_at	421.911	387.232	443.239	498.768	442.464	1308.65	2192.7	1083.32	1000.84	659.842	779.345	Rn.3160.1	gb:NM_012580.1 /DB_XREF=gi:6981031 /GEN=Hmox1 /FEA=FLmRNA /CNT=14 /TID=Rn.3160.1 /TIER=FL /STK=5 /UG=Rn.3160 /LL=24451 /DEF=Rattus norvegicus Heme oxygenase (Hmox1), mRNA. /PROD=heme oxygenas /FL=gb:NM_012580.1	NM_012580	Rn.3160	Rn.3160	chr19:13963136-13969960 (+) // 99.94 // p11	heme oxygenase (decycling) 1	Hmox1	chr19p11	24451	NM_012580	Oxidative_Stress // GenMAPP
1368673_at	TTT	3.03511	Ddr2	DDR2	NM_031764	chr13q24	1368673_at	121.266	68.1236	55.4196	83.9442	92.6736	310.522	246.993	252.091	213.657	95.6961	155.284	Rn.36249.1	gb:NM_031764.1 /DB_XREF=gi:13929079 /GEN=Ddr2 /FEA=FLmRNA /CNT=7 /TID=Rn.36249.1 /TIER=FL /STK=3 /UG=Rn.36249 /LL=83573 /DEF=Rattus norvegicus discoidin domain receptor family, member 2 (Ddr2), mRNA. /PROD=discoidin domain receptor family, member 2 /FL=gb:AF016247.1 gb:NM_031764.1	NM_031764	Rn.36249	Rn.92730	chr13:85802060-85808470 (-) // 98.77 // q24	discoidin domain receptor family, member 2	Ddr2	chr13q24	685781	NM_031764 /// XM_001065242 /// XM_001076634	---
1368490_at	TTT	3.01658	Cd14	CD14	NM_021744	chr18p11	1368490_at	305.45	261.019	701.441	808.486	713.753	1317.98	3479.04	1269.14	667.206	694.761	704.026	Rn.42942.1	gb:NM_021744.1 /DB_XREF=gi:11120687 /GEN=Cd14 /FEA=FLmRNA /CNT=5 /TID=Rn.42942.1 /TIER=FL /STK=5 /UG=Rn.42942 /LL=60350 /DEF=Rattus norvegicus CD14 antigen (Cd14), mRNA. /PROD=CD14 antigen /FL=gb:AF087943.1 gb:NM_021744.1	NM_021744	Rn.42942	Rn.42942	chr18:29374601-29376190 (-) // 82.1 // p11	CD14 antigen	Cd14	chr18p11	60350	NM_021744	---
1373321_at	TTT	3.00757	---	---	BE111682	---	1373321_at	3.96213	2.98559	51.9393	9.73241	28.2126	89.7707	83.9596	48.8855	10.3674	5.75133	3.7104	Rn.96.1	gb:BE111682 /DB_XREF=gi:8503787 /DB_XREF=UI-R-BJ1-avv-f-01-0-UI.s1 /CLONE=UI-R-BJ1-avv-f-01-0-UI /FEA=EST /CNT=9 /TID=Rn.96.1 /TIER=Stack /STK=9 /UG=Rn.96 /UG_TITLE=ESTs	BE111682	Rn.96	Rn.96	chr1:212697157-212697688 (-) // 100.0 // q43	Transcribed locus	---	---	0	---	---
1370607_a_at	TTT	2.99673	Nrg1	NRG1	U02323	chr16q12.3	1370607_a_at	78.8948	12.3657	35.3698	79.9534	52.1054	242.648	66.3016	103.484	207.744	51.8594	27.8056	Rn.37438.2	gb:U02323.1 /DB_XREF=gi:408396 /FEA=FLmRNA /CNT=2 /TID=Rn.37438.2 /TIER=FL /STK=1 /UG=Rn.37438 /LL=112400 /UG_GENE=Nrg1 /DEF=Rattus norvegicus clone ndf42b neu differentiation factor mRNA, complete cds. /PROD=neu differentiation factor /FL=gb:U02319.1 gb:U02323.1	U02323	Rn.37438	Rn.37438	chr16:63937795-64126057 (+) // 95.25 // q12.3	neuregulin 1	Nrg1	chr16q12.3	112400	NM_031588	---
1368679_a_at	TTT	2.98858	Lyn	LYN	L14782	chr5q12	1368679_a_at	142.616	124.198	238.872	285.396	253.099	904.082	754.058	462.685	375.67	279.183	117.225	Rn.4338.1	gb:L14782.1 /DB_XREF=gi:294578 /FEA=FLmRNA /CNT=9 /TID=Rn.4338.1 /TIER=FL /STK=1 /UG=Rn.4338 /LL=81515 /UG_GENE=Lyn /DEF=Rattus norvegicus lyn A protein tyrosine kinase mRNA, complete cds. /PROD=lyn A protein tyrosine kinase /FL=gb:NM_030857.1 gb:L14782.1 gb:AF000300.1 gb:L14951.1	L14782	Rn.4338	Rn.4338	chr5:16933105-17054564 (+) // 99.51 // q12	Yamaguchi sarcoma viral (v-yes-1) oncogene homolog	Lyn	chr5q12	81515	NM_001111098 /// NM_030857	---
1374620_at	TTT	2.86045	Ceacam1	CEACAM1	BM392373	chr1q21-q22	1374620_at	178.515	165.692	345.058	295.741	519.153	704.385	1258.89	960.915	517.87	724.663	315.7	Rn.13242.1	gb:BM392373 /DB_XREF=gi:18192426 /DB_XREF=UI-R-DO1-ckp-p-24-0-UI.s1 /CLONE=UI-R-DO1-ckp-p-24-0-UI /FEA=EST /CNT=9 /TID=Rn.13242.1 /TIER=Stack /STK=6 /UG=Rn.13242 /UG_TITLE=ESTs	BM392373	Rn.13242	Rn.91235	chr1:80742540-80743266 (-) // 97.98 // q21	CEA-related cell adhesion molecule 1	Ceacam1	chr1q21-q22	81613	NM_001033860 /// NM_001033861 /// NM_001033862 /// NM_031755	---
1370832_at	TTT	2.84069	Ccl4	CCL4	U06434	chr10q26	1370832_at	92.7237	71.3535	71.5793	98.2136	95.3229	268.543	175.581	183.784	347.456	54.7786	59.6959	Rn.37880.1	gb:U06434.1 /DB_XREF=gi:459147 /GEN=MIP-1 beta /FEA=FLmRNA /CNT=5 /TID=Rn.37880.1 /TIER=FL /STK=3 /UG=Rn.37880 /LL=116637 /DEF=Rattus norvegicus macrophage inflammatory protein-1 beta (MIP-1 beta) mRNA, complete cds. /PROD=macrophage inflammatory protein-1 beta /FL=gb:U06434.1	U06434	Rn.37880	Rn.37880	chr10:71759428-71761403 (+) // 99.87 // q26	chemokine (C-C motif) ligand 4	Ccl4	chr10q26	116637	NM_053858	---
1387908_at	TTT	2.82669	Rasd1	RASD1	AF239157	chr10q22	1387908_at	198.581	70.7958	158.781	185.218	84.2388	413.424	408.008	378.216	377.906	75.8947	107.301	Rn.7500.1	gb:AF239157.1 /DB_XREF=gi:7230767 /GEN=Dexras1 /FEA=FLmRNA /CNT=18 /TID=Rn.7500.1 /TIER=FL+Stack /STK=12 /UG=Rn.7500 /LL=64455 /DEF=Rattus norvegicus DEXRAS1 (Dexras1) mRNA, complete cds. /PROD=DEXRAS1 /FL=gb:AF239157.1	AF239157	Rn.7500	Rn.54720	chr10:46291404-46293136 (-) // 95.73 // q22	RAS, dexamethasone-induced 1	Rasd1	chr10q22	64455	XM_001077321 /// XM_340809	---
1371286_at	TTT	2.80007	---	---	X76129	---	1371286_at	24.1517	2.30125	80.365	11.1583	16.9088	107.584	90.7892	80.7957	22.9819	104.808	15.1571	Rn.44229.1	gb:X76129 /DB_XREF=gi:458851 /FEA=DNA /CNT=1 /TID=Rn.44229.1 /TIER=ConsEnd /STK=0 /UG=Rn.44229 /LL=57304 /UG_GENE=uPAR-3 /UG_TITLE=urinary plasminogen activator receptor 3 /DEF=Rattus norvegicus uPAR-3 gene, partial CDS	X76129	---	---	---	---	---	---	0	---	---
1383500_at	TTT	2.79875	Rrbp1_predicted	RRBP1_PREDICTED	BI279795	chr3q41	1383500_at	176.382	233.261	470.592	182.06	246.331	517.596	741.45	1166.61	504.35	261.289	520.822	Rn.14684.1	gb:BI279795 /DB_XREF=gi:14927955 /DB_XREF=UI-R-CU0s-cbr-a-04-0-UI.s1 /CLONE=UI-R-CU0s-cbr-a-04-0-UI /FEA=EST /CNT=6 /TID=Rn.14684.1 /TIER=ConsEnd /STK=0 /UG=Rn.14684 /UG_TITLE=ESTs	BI279795	Rn.14684	Rn.14242	chr3:132424977-132427472 (-) // 96.19 // q41	ribosome binding protein 1 homolog 180kDa (dog) (predicted)	Rrbp1_predicted	chr3q41	311483	XM_001053542 /// XM_001053614 /// XM_001053669 /// XM_001053726 /// XM_230637	---
1390119_at	TTT	2.79189	Sfrp2	SFRP2	BF396602	chr2q34	1390119_at	147.174	300.952	380.058	304.533	141.548	1291.88	600.974	548.312	404.92	189.407	231.856	Rn.7711.1	gb:BF396602 /DB_XREF=gi:11381577 /DB_XREF=UI-R-BS2-bea-a-08-0-UI.s1 /CLONE=UI-R-BS2-bea-a-08-0-UI /FEA=EST /CNT=10 /TID=Rn.7711.1 /TIER=ConsEnd /STK=5 /UG=Rn.7711 /UG_TITLE=ESTs	BF396602	Rn.7711	Rn.102416	chr2:175486266-175486880 (+) // 100.0 // q34	secreted frizzled-related protein 2	Sfrp2	chr2q34	310552	XM_001065174 /// XM_227314	---
1375612_at	TTT	2.78519	---	---	AA965147	---	1375612_at	791.525	247.601	152.277	403.04	329.149	1047.09	1010.34	659.838	1568.78	338.724	474.443	Rn.35870.2	gb:AA965147 /DB_XREF=gi:4280021 /DB_XREF=UI-R-C0-hc-h-02-0-UI.s1 /CLONE=UI-R-C0-hc-h-02-0-UI /FEA=EST /CNT=7 /TID=Rn.35870.2 /TIER=Stack /STK=7 /UG=Rn.35870 /LL=29578 /UG_GENE=Hnrpa1 /UG_TITLE=heterogeneous nuclear ribonucleoprotein A1	AA965147	Rn.35870	Rn.151553	chr3:149064239-149064630 (+) // 94.6 // q42 /// chr5:112143253-112143630 (+) // 95.12 // q32 /// chr17:51934737-51935116 (+) // 93.83 // q11 /// chr4:85929594-85929970 (-) // 92.29 // q24 /// chr7:142154149-142154517 (-) // 94.6 // q36 /// chr7:136983720-136984093 (-) // 90.75 // q36 /// chr7:13200136-13200513 (-) // 91.52 // q11 /// chr9:28840310-28840687 (-) // 93.32 // q21	Transcribed locus	---	---	0	---	---
1376934_x_at	TTT	2.77295	---	---	BI285801	---	1376934_x_at	5.9674	4.53828	52.8331	10.2652	13.8579	72.075	65.3333	43.3942	13.2195	20.3419	8.60984	Rn.78602.1	gb:BI285801 /DB_XREF=gi:14939815 /DB_XREF=UI-R-CX0s-ccv-a-08-0-UI.s1 /CLONE=UI-R-CX0s-ccv-a-08-0-UI /FEA=EST /CNT=5 /TID=Rn.78602.1 /TIER=ConsEnd /STK=4 /UG=Rn.78602 /UG_TITLE=ESTs	BI285801	---	---	---	---	---	---	0	---	---
1385047_x_at	TTT	2.75363	LOC363894 /// LOC685048 /// LOC685111 /// LOC685157 /// LOC685438 /// LOC686864 /// RGD1559588_predicted	LOC363894 /// LOC685048 /// LOC685111 /// LOC685157 /// LOC685438 /// LOC686864 /// RGD1559588_PREDICTED	AI012782	chr12q11 /// chr12q12	1385047_x_at	72.1566	125.089	129.309	71.2068	52.814	298.705	370.142	175.678	148.05	102.762	103.719	Rn.3456.2	gb:AI012782 /DB_XREF=gi:3226614 /DB_XREF=EST207233 /CLONE=RPLBB56 /FEA=EST /CNT=1 /TID=Rn.3456.2 /TIER=ConsEnd /STK=1 /UG=Rn.3456 /UG_TITLE=ESTs	AI012782	Rn.3456	Rn.154833	chr12:17984728-17987502 (+) // 99.42 // q11 /// chr12:20039074-20057484 (+) // 90.12 // q12	similar to cell surface receptor FDFACT (predicted) /// similar to paired immunoglobin-like type 2 receptor beta	LOC363894 /// LOC685048 /// LOC685111 /// LOC685157 /// LOC685438 /// LOC686864 /// RGD1559588_predicted	chr12q11 /// chr12q12	0	XM_001062063 /// XM_001062357 /// XM_001062594 /// XM_001063789 /// XM_001075881 /// XM_001076102 /// XM_221990 /// XM_344092	---
1368245_at	TTT	2.70507	Upb1	UPB1	NM_053845	chr20p12	1368245_at	8.9656	9.8002	53.6443	7.11528	11.795	88.6895	47.0677	49.7194	12.1457	21.1658	50.8418	Rn.11110.1	gb:NM_053845.1 /DB_XREF=gi:16758703 /GEN=Upb1 /FEA=FLmRNA /CNT=9 /TID=Rn.11110.1 /TIER=FL+Stack /STK=7 /UG=Rn.11110 /LL=116593 /DEF=Rattus norvegicus ureidopropionase, beta (Upb1), mRNA. /PROD=ureidopropionase, beta /FL=gb:M97662.1 gb:NM_053845.1	NM_053845	Rn.11110	Rn.11110	chr20:13715992-13743261 (-) // 79.47 // p12	ureidopropionase, beta	Upb1	chr20p12	116593	NM_053845	---
1370904_at	TTT	2.67872	Hla-dma	HLA-DMA	BI301490	chr20p12	1370904_at	316.697	258.678	290.46	458.796	434.404	957.161	1172.52	756.217	883.67	349.8	365.69	Rn.35809.1	gb:BI301490 /DB_XREF=gi:14977770 /DB_XREF=UI-R-DN0-cit-m-01-0-UI.s1 /CLONE=UI-R-DN0-cit-m-01-0-UI /FEA=mRNA /CNT=12 /TID=Rn.35809.1 /TIER=Stack /STK=11 /UG=Rn.35809 /UG_TITLE=R.norvegicus mRNA for RT1.Ma	BI301490	Rn.35809	Rn.35809	chr20:4843458-4846827 (-) // 97.95 // p12	major histocompatibility complex, class II, DM alpha	Hla-dma	chr20p12	294274	NM_198741	---
1373490_at	TTT	2.64895	Gmfg	GMFG	BG666787	chr1q21	1373490_at	611.32	640.085	684.83	1015.87	1018.57	2072.23	3069.3	1438.31	1834.68	542.533	419.087	Rn.15333.1	gb:BG666787 /DB_XREF=gi:13888709 /DB_XREF=DRABWG04 /CLONE=DRABWG04 /FEA=EST /CNT=11 /TID=Rn.15333.1 /TIER=Stack /STK=8 /UG=Rn.15333 /UG_TITLE=ESTs, Highly similar to JC7218 glia maturation factor-gamma - rat (R.norvegicus)	BG666787	Rn.15333	Rn.15333	chr1:83552030-83557021 (+) // 99.62 // q21	glia maturation factor, gamma	Gmfg	chr1q21	113940	NM_181091	---
1368559_at	TTT	2.62547	Pcsk1	PCSK1	NM_017091	chr2q11-q12	1368559_at	7.51505	7.92569	34.7888	9.94732	11.1907	51.0684	17.0709	72.6317	9.12754	75.4878	3.07055	Rn.11384.1	gb:NM_017091.1 /DB_XREF=gi:8393918 /GEN=Pcsk1 /FEA=FLmRNA /CNT=12 /TID=Rn.11384.1 /TIER=FL /STK=3 /UG=Rn.11384 /LL=25204 /DEF=Rattus norvegicus Protein convertase subtilisin kexin, type I (Pcsk1), mRNA. /PROD=protein convertase subtilisin kexin, type I /FL=gb:M76705.1 gb:M83745.1 gb:NM_017091.1	NM_017091	Rn.11384	Rn.11384	chr2:1923308-1970234 (+) // 98.81 // q11	proprotein convertase subtilisin/kexin type 1	Pcsk1	chr2q11-q12	25204	NM_017091	---
1369181_at	TTT	2.62493	Cybb	CYBB	NM_023965	chrXq13	1369181_at	155.587	86.9278	153.038	211.826	113.303	408.314	396.382	249.57	459.123	86.0887	68.4607	Rn.64497.1	gb:NM_023965.1 /DB_XREF=gi:13027415 /GEN=Cybb /FEA=FLmRNA /CNT=4 /TID=Rn.64497.1 /TIER=FL /STK=2 /UG=Rn.64497 /LL=66021 /DEF=Rattus norvegicus endothelial type gp91-phox gene (Cybb), mRNA. /PROD=endothelial type gp91-phox gene /FL=gb:AF298656.3 gb:NM_023965.1	NM_023965	Rn.64497	Rn.98491	chrX:25514571-25547181 (-) // 99.82 // q13	cytochrome b-245, beta polypeptide	Cybb	chrXq13	66021	NM_023965	---
1370141_at	TTT	2.60239	---	---	NM_021846	---	1370141_at	739.272	455.827	422.974	604.881	602.855	1620.99	2386.75	854.466	1020.89	851.856	724.381	Rn.44219.1	gb:NM_021846.1 /DB_XREF=gi:11177877 /GEN=Mcl1 /FEA=FLmRNA /CNT=4 /TID=Rn.44219.1 /TIER=FL /STK=0 /UG=Rn.44219 /LL=60430 /DEF=Rattus norvegicus myeloid cell leukemia sequence 1 (Mcl1), mRNA. /PROD=myeloid cell leukemia sequence 1 /FL=gb:NM_021846.1 gb:AF115380.1	NM_021846	---	---	chr3:139974232-139975750 (+) // 78.43 // q41	---	---	---	0	---	---
1375807_at	TTT	2.58385	Kcnk3	KCNK3	AI602886	chr6q14	1375807_at	7.70126	9.52319	89.6767	15.0729	26.1108	105.37	59.05	108.361	33.3227	10.9847	61.2371	Rn.80679.4	gb:AI602886 /DB_XREF=gi:4612047 /DB_XREF=UI-R-AE0-xm-h-07-0-UI.s1 /CLONE=UI-R-AE0-xm-h-07-0-UI /FEA=EST /CNT=6 /TID=Rn.80679.4 /TIER=Stack /STK=6 /UG=Rn.80679 /LL=29553 /UG_GENE=Kcnk3 /UG_TITLE=potassium channel, subfamily K, member 3	AI602886	Rn.80679	Rn.15536	chr6:25746361-25746772 (+) // 100.0 // q14	Potassium channel, subfamily K, member 3	Kcnk3	chr6q14	29553	NM_033376	---
1389444_at	TTT	2.54501	RGD1305755	RGD1305755	AI179665	chr15p12	1389444_at	508.416	137.502	158.286	206.816	170.006	532.837	747.988	519.246	604.505	80.8487	124.146	Rn.22849.1	gb:AI179665 /DB_XREF=gi:3730303 /DB_XREF=EST223390 /CLONE=RSPCK21 /FEA=EST /CNT=8 /TID=Rn.22849.1 /TIER=Stack /STK=7 /UG=Rn.22849 /UG_TITLE=ESTs	AI179665	Rn.22849	Rn.22849	chr15:36878589-36879007 (-) // 80.5 // p12	Similar to RIKEN cDNA 5033406L14	RGD1305755	chr15p12	305923	NM_001039336	---
1368450_at	TTT	2.46271	Myo5a	MYO5A	NM_022178	chr8q24	1368450_at	220.96	137.61	80.8401	206.343	218.362	585.07	352.383	301.078	463.92	214.87	206.052	Rn.44865.1	gb:NM_022178.1 /DB_XREF=gi:11559934 /GEN=Myo5a /FEA=FLmRNA /CNT=9 /TID=Rn.44865.1 /TIER=FL /STK=5 /UG=Rn.44865 /LL=25017 /DEF=Rattus norvegicus Dilute-opisthotonus (Myo5a), mRNA. /PROD=dilute-opisthotonus /FL=gb:AB035736.1 gb:NM_022178.1	NM_022178	Rn.44865	Rn.44865	chr8:79909228-80027287 (+) // 98.28 // q24	myosin Va	Myo5a	chr8q24	25017	NM_022178	---
1369160_a_at	TTT	2.40911	Slc4a7	SLC4A7	AF070475	chr15p16	1369160_a_at	110.639	83.2731	72.3894	61.4461	107.51	237.625	200.357	211.953	188.929	136.084	101.821	Rn.26856.3	gb:AF070475.1 /DB_XREF=gi:5669563 /GEN=NBC2 /FEA=FLmRNA /CNT=1 /TID=Rn.26856.3 /TIER=FL /STK=1 /UG=Rn.26856 /LL=117955 /DEF=Rattus norvegicus NBC-like protein 2 (NBC2) mRNA, complete cds. /PROD=NBC-like protein 2 /FL=gb:AF070475.1	AF070475	Rn.26856	Rn.26856	chr15:12071974-12125841 (-) // 91.4 // p16	solute carrier family 4, sodium bicarbonate cotransporter, member 7	Slc4a7	chr15p16	117955	NM_058211	---
1369985_at	TTT	2.26979	Crybb1	CRYBB1	NM_012936	---	1369985_at	6.30071	7.26562	8.91597	4.84519	7.45141	26.2647	13.8178	18.3623	4.70787	14.4901	6.23325	Rn.10602.1	gb:NM_012936.1 /DB_XREF=gi:6978710 /GEN=Crybb1 /FEA=FLmRNA /CNT=17 /TID=Rn.10602.1 /TIER=FL+Stack /STK=12 /UG=Rn.10602 /LL=25421 /DEF=Rattus norvegicus Crystallin beta B1 (Crybb1), mRNA. /PROD=crystallin beta B1 /FL=gb:NM_012936.1	NM_012936	Rn.10602	Rn.10602	---	crystallin, beta B1	Crybb1	---	25421	NM_012936	---
1382375_at	TTT	2.24903	---	---	AI639128	---	1382375_at	199.11	163.414	214.314	97.2703	138.889	242.545	218.425	387.706	614.086	213.208	190.126	Rn.57527.1	gb:AI639128 /DB_XREF=gi:4700162 /DB_XREF=rx00303s /CLONE=rx00303 /FEA=EST /CNT=4 /TID=Rn.57527.1 /TIER=ConsEnd /STK=1 /UG=Rn.57527 /UG_TITLE=ESTs	AI639128	Rn.57527	Rn.206003	chr16:3800605-3801432 (+) // 92.71 // p16	Transcribed locus	---	---	0	---	---
1387159_at	TTT	2.24566	Ager	AGER	NM_053336	chr20p12	1387159_at	9.24194	9.03032	28.0771	11.1988	10.4415	29.3411	10.666	55.4976	26.6407	13.5865	13.8978	Rn.9829.1	gb:NM_053336.1 /DB_XREF=gi:16758047 /GEN=Ager /FEA=FLmRNA /CNT=7 /TID=Rn.9829.1 /TIER=FL+Stack /STK=6 /UG=Rn.9829 /LL=81722 /DEF=Rattus norvegicus advanced glycosylation end product-specific receptor (Ager), mRNA. /PROD=advanced glycosylation end product-specificreceptor /FL=gb:L33413.1 gb:NM_053336.1	NM_053336	Rn.9829	Rn.9829	chr20:4250614-4253540 (-) // 98.61 // p12	advanced glycosylation end product-specific receptor	Ager	chr20p12	81722	NM_053336	---
1370113_at	TTT	2.22237	Birc3	BIRC3	NM_023987	chr8q11	1370113_at	220.055	128.515	225.574	229.413	285.986	496.41	648.303	294.337	498.042	427.051	217.278	Rn.64578.1	gb:NM_023987.1 /DB_XREF=gi:13027445 /GEN=Birc2 /FEA=FLmRNA /CNT=4 /TID=Rn.64578.1 /TIER=FL /STK=1 /UG=Rn.64578 /LL=78971 /DEF=Rattus norvegicus inhibitor of apoptosis protein 1 (Birc2), mRNA. /PROD=inhibitor of apoptosis protein 1 /FL=gb:NM_023987.1 gb:AF183430.1	NM_023987	Rn.64578	Rn.64578	chr8:4682189-4692296 (-) // 95.7 // q11	baculoviral IAP repeat-containing 3	Birc3	chr8q11	78971	NM_023987	Apoptosis // GenMAPP
1387259_at	TTT	2.21275	Cdh2	CDH2	AF097593	chr18p13	1387259_at	35.3558	35.2477	53.4989	95.1843	51.7586	122.109	109.836	121.576	126.283	25.3333	55.0042	Rn.17239.1	gb:AF097593.1 /DB_XREF=gi:3983130 /FEA=FLmRNA /CNT=23 /TID=Rn.17239.1 /TIER=FL+Stack /STK=8 /UG=Rn.17239 /LL=83501 /UG_GENE=Cdh2 /DEF=Rattus norvegicus testicular N-cadherin mRNA, complete cds. /PROD=testicular N-cadherin /FL=gb:AB017695.1 gb:NM_031333.1 gb:AF097593.1	AF097593	Rn.17239	Rn.23200	chr18:8048919-8262609 (-) // 93.29 // p13	cadherin 2	Cdh2	chr18p13	83501	NM_031333	---
1370348_at	TTT	2.16749	Ninj1	NINJ1	U72660	chr17p14	1370348_at	767.88	799.705	696.525	1000.63	1100.43	2142.15	2669.83	1460.04	1297.14	966.559	1182.92	Rn.11245.1	gb:U72660.1 /DB_XREF=gi:1644365 /FEA=FLmRNA /CNT=14 /TID=Rn.11245.1 /TIER=FL+Stack /STK=9 /UG=Rn.11245 /LL=25338 /UG_GENE=Ninj1 /DEF=Rattus norvegicus ninjurin1 mRNA, complete cds. /PROD=ninjurin1 /FL=gb:U72660.1	U72660	Rn.11245	Rn.11245	chr17:21410700-21419494 (-) // 97.69 // p14	ninjurin 1	Ninj1	chr17p14	25338	NM_012867	---
1372870_at	TTT	2.16704	Kdelr3_predicted	KDELR3_PREDICTED	BM391302	chr7q34	1372870_at	289.368	550.659	1271.36	555.31	529.26	1793.29	1128.74	1561	1057.59	491.942	825.455	Rn.16696.1	gb:BM391302 /DB_XREF=gi:18191355 /DB_XREF=UI-R-DY0-ckq-h-21-0-UI.s1 /CLONE=UI-R-DY0-ckq-h-21-0-UI /FEA=EST /CNT=13 /TID=Rn.16696.1 /TIER=Stack /STK=10 /UG=Rn.16696 /UG_TITLE=ESTs, Highly similar to ER23_HUMAN ER LUMEN PROTEIN RETAINING RECEPTOR 3 (H.sapiens)	BM391302	Rn.16696	Rn.144441	chr7:117556566-117558526 (-) // 100.0 // q34	KDEL (Lys-Asp-Glu-Leu) endoplasmic reticulum protein retention receptor 3 (predicted)	Kdelr3_predicted	chr7q34	315131	XM_001076531 /// XM_235478	---
1390154_at	TTT	2.15209	LOC686326	LOC686326	BI299824	---	1390154_at	227.59	108.984	219.581	267.154	311.583	525.571	453.972	336.325	638.044	218.387	174.088	Rn.24154.1	gb:BI299824 /DB_XREF=gi:14976104 /DB_XREF=UI-R-CV2-chx-f-09-0-UI.s1 /CLONE=UI-R-CV2-chx-f-09-0-UI /FEA=EST /CNT=10 /TID=Rn.24154.1 /TIER=ConsEnd /STK=5 /UG=Rn.24154 /UG_TITLE=ESTs	BI299824	Rn.24154	---	---	similar to Interferon-alpha/beta receptor beta chain precursor (IFN-alpha-REC) (Type I interferon receptor) (IFN-R) (Interferon alpha/beta receptor-2)	LOC686326	---	686326	XM_001073550	---
1370035_at	TTT	2.12305	Kras	KRAS	NM_031515	chr4q44	1370035_at	866.176	497.522	718.08	886.948	735.716	982.415	1351.12	1032.32	2925.92	756.726	617.971	Rn.24554.1	gb:NM_031515.1 /DB_XREF=gi:13928697 /GEN=Kras2 /FEA=FLmRNA /CNT=20 /TID=Rn.24554.1 /TIER=FL+Stack /STK=8 /UG=Rn.24554 /LL=24525 /DEF=Rattus norvegicus Kirsten rat sarcoma viral oncogene homologue 2 (active) (Kras2), mRNA. /PROD=kirsten rat sarcoma viral oncogene homologue 2(active) /FL=gb:U09793.1 gb:NM_031515.1	NM_031515	Rn.24554	Rn.24554	chr4:182868137-182895106 (-) // 98.02 // q44	v-Ki-ras2 Kirsten rat sarcoma viral oncogene homolog	Kras	chr4q44	24525	NM_031515	G_Protein_Signaling // GenMAPP /// MAPK_Cascade // GenMAPP
1375362_at	TTT	2.04351	RGD1563001_predicted	RGD1563001_PREDICTED	BI304125	chr3q36	1375362_at	577.721	251.353	480.292	310.55	373.859	688.113	914.672	782.292	874.37	252.09	375.351	Rn.8666.1	gb:BI304125 /DB_XREF=gi:14980405 /DB_XREF=UI-R-DR0-cjc-l-03-0-UI.s1 /CLONE=UI-R-DR0-cjc-l-03-0-UI /FEA=EST /CNT=11 /TID=Rn.8666.1 /TIER=Stack /STK=9 /UG=Rn.8666 /UG_TITLE=ESTs	BI304125	Rn.8666	Rn.8666	chr3:114428233-114428690 (-) // 68.84 // q36	similar to RIKEN cDNA 2010106G01 (predicted)	RGD1563001_predicted	chr3q36	311401	NM_001107770 /// XM_001081083 /// XM_230567	---
1369063_at	TTT	2.00991	Anp32a	ANP32A	NM_012903	chr8q24	1369063_at	661.932	318.457	373.192	247.134	294.389	830.6	727.047	678.558	810.995	250.022	391.864	Rn.10123.1	gb:NM_012903.1 /DB_XREF=gi:6978498 /GEN=Anp32 /FEA=FLmRNA /CNT=5 /TID=Rn.10123.1 /TIER=FL /STK=2 /UG=Rn.10123 /LL=25379 /DEF=Rattus norvegicus Acid nuclear phosphoprotein 32 (leucine rich) (Anp32), mRNA. /PROD=acid nuclear phosphoprotein 32 (leucine rich) /FL=gb:D32209.1 gb:NM_012903.1	NM_012903	Rn.10123	Rn.10123	chr8:66488187-66523444 (+) // 94.62 // q24	acidic (leucine-rich) nuclear phosphoprotein 32 family, member A	Anp32a	chr8q24	25379	NM_012903 /// XM_001075603	---
1375703_at	TTT	2.00503	Mll5	MLL5	BE117891	chr4q11	1375703_at	799.383	160.068	343.1	256.03	275.05	816.963	870.847	602.56	650.82	177.887	343.875	Rn.34968.1	gb:BE117891 /DB_XREF=gi:8509996 /DB_XREF=UI-R-BS1-azm-b-12-0-UI.s1 /CLONE=UI-R-BS1-azm-b-12-0-UI /FEA=EST /CNT=8 /TID=Rn.34968.1 /TIER=Stack /STK=6 /UG=Rn.34968 /UG_TITLE=ESTs	BE117891	Rn.34968	Rn.106040	chr4:7049740-7053723 (-) // 98.66 // q11	myeloid/lymphoid or mixed-lineage leukemia 5 (trithorax homolog, Drosophila)	Mll5	chr4q11	311968	XM_001059647 /// XM_001059700 /// XM_231287	---
1372095_at	NNN	0.494446	---	---	BF281867	---	1372095_at	399.432	311.17	341.191	192.357	236.821	125.665	107.546	148.459	204.136	69.3949	106.044	Rn.13742.1	gb:BF281867 /DB_XREF=gi:11212937 /DB_XREF=EST446458 /CLONE=RGIBH43 /FEA=EST /CNT=18 /TID=Rn.13742.1 /TIER=Stack /STK=13 /UG=Rn.13742 /UG_TITLE=ESTs	BF281867	Rn.13742	Rn.106115	chr5:58915652-58916491 (-) // 48.12 // q22	Transcribed locus, strongly similar to XP_991502.1 PREDICTED: similar to CG11909-PA [Mus musculus]	---	---	0	---	---
1388452_at	NNN	0.493751	Spock2_predicted	SPOCK2_PREDICTED	AI716904	chr20q11	1388452_at	244.962	219.157	214.098	142.246	81.9323	78.2077	82.5036	76.2582	119.477	165.061	103.659	Rn.15590.1	gb:AI716904 /DB_XREF=gi:5034160 /DB_XREF=UI-R-Y0-aci-e-11-0-UI.s1 /CLONE=UI-R-Y0-aci-e-11-0-UI /FEA=EST /CNT=22 /TID=Rn.15590.1 /TIER=Stack /STK=17 /UG=Rn.15590 /UG_TITLE=ESTs	AI716904	Rn.15590	Rn.15590	chr20:27425165-27425913 (+) // 97.78 // q11	sparc/osteonectin, cwcv and kazal-like domains proteoglycan 2 (predicted)	Spock2_predicted	chr20q11	361840	NM_001108533 /// XM_001055082 /// XM_001055146 /// XM_342134	---
1370138_at	NNN	0.491676	Lef1	LEF1	NM_130429	chr2q34-q45	1370138_at	205.037	19.453	83.0491	33.9649	39.8748	74.2177	10.9689	50.1776	14.6476	5.4275	5.8506	Rn.21926.1	gb:NM_130429.1 /DB_XREF=gi:18426859 /GEN=Lef1 /FEA=FLmRNA /CNT=4 /TID=Rn.21926.1 /TIER=FL /STK=0 /UG=Rn.21926 /DEF=Rattus norvegicus lymphoid enhancer binding factor 1 (Lef1), mRNA. /PROD=lymphoid enhancer binding factor 1 /FL=gb:NM_130429.1	NM_130429	Rn.21926	Rn.21926	chr2:228550262-228689635 (+) // 97.93 // q43	lymphoid enhancer binding factor 1	Lef1	chr2q34-q45	161452	NM_130429	TGF_Beta_Signaling_Pathway // GenMAPP
1376724_at	NNN	0.484706	---	---	AI170671	---	1376724_at	337.736	365.906	263.975	213.89	129.575	126.468	95.4244	99.8054	186.694	17.6825	55.6675	Rn.15423.1	gb:AI170671 /DB_XREF=gi:3710711 /DB_XREF=EST216607 /CLONE=RMUAZ73 /FEA=EST /CNT=11 /TID=Rn.15423.1 /TIER=ConsEnd /STK=4 /UG=Rn.15423 /UG_TITLE=ESTs	AI170671	Rn.15423	Rn.15423	chr2:192512141-192513640 (+) // 93.91 // q34	Transcribed locus	---	---	0	---	---
1373564_at	NNN	0.483521	Hibch	HIBCH	AI410548	chr9q22	1373564_at	1064.31	618.152	1017.66	339.122	441.703	209.649	249.11	390.514	497.219	138.141	358.122	Rn.7565.1	gb:AI410548 /DB_XREF=gi:4254052 /DB_XREF=EST238841 /CLONE=RHECY11 /FEA=EST /CNT=10 /TID=Rn.7565.1 /TIER=Stack /STK=8 /UG=Rn.7565 /UG_TITLE=ESTs	AI410548	Rn.7565	Rn.8745	chr9:45564710-45565158 (-) // 48.34 // q22	3-hydroxyisobutyryl-Coenzyme A hydrolase	Hibch	chr9q22	301384	NM_001013112	---
1386968_at	NNN	0.480891	Ppp1r1a	PPP1R1A	NM_022676	chr7q36	1386968_at	268.228	436.868	360.33	178.217	109.326	124.525	138.021	100.634	157.324	113.085	59.6426	Rn.9756.1	gb:NM_022676.1 /DB_XREF=gi:12083614 /GEN=Ppp1r1a /FEA=FLmRNA /CNT=19 /TID=Rn.9756.1 /TIER=FL+Stack /STK=14 /UG=Rn.9756 /LL=58977 /DEF=Rattus norvegicus protein phosphatase 1, regulatory (inhibitor) subunit 1A (Ppp1r1a), mRNA. /PROD=protein phosphatase 1, regulatory (inhibitor)subunit 1A /FL=gb:NM_022676.1 gb:J05592.1	NM_022676	Rn.9756	Rn.9756	chr7:142429527-142436250 (-) // 95.98 // q36	protein phosphatase 1, regulatory (inhibitor) subunit 1A	Ppp1r1a	chr7q36	58977	NM_022676	---
1376194_at	NNN	0.470943	---	---	BM384889	---	1376194_at	370.233	506.236	403.525	212.172	126.328	163.717	135.038	128.82	182.2	66.1538	135.857	Rn.25063.1	gb:BM384889 /DB_XREF=gi:18184942 /DB_XREF=UI-R-DY0-ckl-h-24-0-UI.s1 /CLONE=UI-R-DY0-ckl-h-24-0-UI /FEA=EST /CNT=6 /TID=Rn.25063.1 /TIER=ConsEnd /STK=5 /UG=Rn.25063 /UG_TITLE=ESTs	BM384889	Rn.25063	Rn.25063	chr11:58642094-58642604 (-) // 99.03 // q21	Transcribed locus	---	---	0	---	---
1377806_at	NNN	0.469407	---	---	BF556273	---	1377806_at	1094.81	1172.98	909.394	473.77	331.012	343.102	312.623	349.327	490.279	312.239	486.461	Rn.15565.1	gb:BF556273 /DB_XREF=gi:11666003 /DB_XREF=UI-R-A1-em-d-07-0-UI.r1 /CLONE=UI-R-A1-em-d-07-0-UI /FEA=EST /CNT=6 /TID=Rn.15565.1 /TIER=ConsEnd /STK=3 /UG=Rn.15565 /UG_TITLE=ESTs	BF556273	---	---	chr10:76377168-76377584 (+) // 100.0 // q26	---	---	---	0	---	---
1376411_at	NNN	0.465841	LOC304037	LOC304037	BE107062	chr11q21	1376411_at	262.179	264.816	260.824	166.292	131.41	98.9092	50.1909	145.29	110.154	90.5725	218.159	Rn.30700.1	gb:BE107062 /DB_XREF=gi:8499167 /DB_XREF=UI-R-BS1-ayp-d-07-0-UI.s1 /CLONE=UI-R-BS1-ayp-d-07-0-UI /FEA=EST /CNT=5 /TID=Rn.30700.1 /TIER=ConsEnd /STK=5 /UG=Rn.30700 /UG_TITLE=ESTs	BE107062	Rn.30700	Rn.30700	chrUn:8138354-8138881 (-) // 100.0 //	similar to ADP-ribosylation factor-like 2-like 1	LOC304037	chr11q21	304037	NM_001107101 /// XM_001055321 /// XM_221604	---
1376767_at	NNN	0.465137	Gpr116	GPR116	BF542425	chr9q12	1376767_at	334.64	150.082	156.03	105.784	87.268	44.5722	64.9928	125.431	75.2701	64.5287	11.2967	Rn.34723.1	gb:BF542425 /DB_XREF=gi:11633538 /DB_XREF=UI-R-C3-sh-f-06-0-UI.r1 /CLONE=UI-R-C3-sh-f-06-0-UI /FEA=EST /CNT=6 /TID=Rn.34723.1 /TIER=ConsEnd /STK=4 /UG=Rn.34723 /UG_TITLE=ESTs	BF542425	Rn.34723	Rn.25073	chr9:13217220-13218021 (-) // 99.75 // q12	G protein-coupled receptor 116	Gpr116	chr9q12	245977	NM_139110	---
1376344_at	NNN	0.464141	---	---	AI010267	---	1376344_at	230.049	149.349	253.027	185.041	147.666	93.0629	74.7545	105.279	85.2692	46.4639	30.4833	Rn.13660.1	gb:AI010267 /DB_XREF=gi:3224099 /DB_XREF=EST204718 /CLONE=RLUBW18 /FEA=EST /CNT=5 /TID=Rn.13660.1 /TIER=ConsEnd /STK=5 /UG=Rn.13660 /UG_TITLE=ESTs	AI010267	Rn.13660	Rn.13660	chr3:53409388-53410014 (+) // 99.84 // q21	Transcribed locus	---	---	0	---	---
1367897_at	NNN	0.455571	Acadvl	ACADVL	NM_012891	chr10q24	1367897_at	1871.97	1375.22	2098.22	1139.71	900.598	665.796	549.967	817.814	658.198	1052.13	824.188	Rn.33319.1	gb:NM_012891.1 /DB_XREF=gi:6978434 /GEN=Acadvl /FEA=FLmRNA /CNT=26 /TID=Rn.33319.1 /TIER=FL+Stack /STK=13 /UG=Rn.33319 /LL=25363 /DEF=Rattus norvegicus Acyl-Coa dehydrogenase, Very long chain (Acadvl), mRNA. /PROD=very long chain Acyl-Coa dehydrogenase /FL=gb:NM_012891.1 gb:D30647.1	NM_012891	Rn.33319	Rn.33319	chr10:56855843-56861376 (-) // 99.28 // q24	acyl-Coenzyme A dehydrogenase, very long chain	Acadvl	chr10q24	25363	NM_012891	Fatty_Acid_Degradation // GenMAPP /// Mitochondrial_fatty_acid_betaoxidation // GenMAPP
1370006_at	NNN	0.452305	LOC679739 /// LOC692052 /// Ndufs6	LOC679739 /// LOC692052 /// NDUFS6	NM_019223	chr17p14 /// chr2q12	1370006_at	10174.1	12801.1	10407.4	5505.02	5630.85	3611.31	3183.88	5053.09	4260.45	4492.79	2557.08	Rn.6166.1	gb:NM_019223.1 /DB_XREF=gi:9506912 /GEN=Ndufs6 /FEA=FLmRNA /CNT=18 /TID=Rn.6166.1 /TIER=FL+Stack /STK=10 /UG=Rn.6166 /LL=29478 /DEF=Rattus norvegicus NADH dehydrogenase Fe-S protein 6 (Ndufs6), mRNA. /PROD=NADH dehydrogenase Fe-S protein 6 /FL=gb:NM_019223.1	NM_019223	Rn.6166	Rn.154403	chr2:26295595-26296262 (+) // 98.84 // q12	NADH dehydrogenase (ubiquinone) Fe-S protein 6	LOC679739 /// LOC692052 /// Ndufs6	chr17p14 /// chr2q12	0	NM_019223 /// XM_001053017 /// XM_001053018	Electron_Transport_Chain // GenMAPP
1369292_at	NNN	0.448043	Hsd17b1	HSD17B1	NM_012851	chr10q32.1	1369292_at	91.9809	76.0298	195.522	147.345	45.899	12.4306	53.4472	35.9243	97.7659	28.4964	55.0087	Rn.10594.1	gb:NM_012851.1 /DB_XREF=gi:6981047 /GEN=Hsd17b1 /FEA=FLmRNA /CNT=3 /TID=Rn.10594.1 /TIER=FL /STK=2 /UG=Rn.10594 /LL=25322 /DEF=Rattus norvegicus Hydroxysteroid dehydrogenase 17 beta, type 1 (Hsd17b1), mRNA. /PROD=hydroxysteroid dehydrogenase 17 beta, type 1 /FL=gb:NM_012851.1	NM_012851	Rn.10594	Rn.10594	chr10:90094248-90096450 (+) // 85.96 // q32.1	hydroxysteroid (17-beta) dehydrogenase 1	Hsd17b1	chr10q32.1	25322	NM_012851	Steroid_Biosynthesis // GenMAPP
1386867_at	NNN	0.446303	Brp44l	BRP44L	NM_133561	chr1q11	1386867_at	6960.92	12558.5	9672.59	6725.48	4524.54	3063.66	3279.57	4541.77	3554.55	2259.89	1878.46	Rn.3718.1	gb:NM_133561.1 /DB_XREF=gi:19424243 /GEN=Brp44l /FEA=FLmRNA /CNT=37 /TID=Rn.3718.1 /TIER=FL+Stack /STK=34 /UG=Rn.3718 /LL=171087 /DEF=Rattus norvegicus brain protein 44-like (Brp44l), mRNA. /PROD=brain protein 44-like /FL=gb:AF304429.1 gb:NM_133561.1	NM_133561	Rn.3718	Rn.3718	chr1:47077720-47089344 (-) // 98.01 // q11	brain protein 44-like	Brp44l	chr1q11	171087	NM_133561	---
1398276_at	NNN	0.443018	Dlgh2	DLGH2	NM_022282	chr1q32	1398276_at	215.295	245.418	193.749	160.787	92.1148	101.224	20.8982	122.618	76.8425	10.7281	36.9217	Rn.1965.1	gb:NM_022282.1 /DB_XREF=gi:11560112 /GEN=Dlg2 /FEA=FLmRNA /CNT=3 /TID=Rn.1965.1 /TIER=FL /STK=2 /UG=Rn.1965 /LL=64053 /DEF=Rattus norvegicus discs, large (Drosophila) homolog 2 (chapsyn-110) (Dlg2), mRNA. /PROD=discs, large (Drosophila) homolog 2(chapsyn-110) /FL=gb:NM_022282.1 gb:U49049.1	NM_022282	Rn.1965	Rn.202966	chr1:147887477-149274633 (+) // 99.57 // q32	discs, large homolog 2 (Drosophila)	Dlgh2	chr1q32	64053	NM_022282	---
1370960_at	NNN	0.437854	Igfbp5	IGFBP5	BE104060	chr9q33	1370960_at	2483.86	2438.86	2125.85	1085.85	805.696	1057.06	401.151	852.849	820.51	57.3175	73.6036	Rn.1593.1	gb:BE104060 /DB_XREF=gi:8496160 /DB_XREF=UI-R-BX0-ark-c-06-0-UI.s1 /CLONE=UI-R-BX0-ark-c-06-0-UI /FEA=mRNA /CNT=45 /TID=Rn.1593.1 /TIER=Stack /STK=6 /UG=Rn.1593 /UG_TITLE=Rattus norvegicus insulin-like growth factor binding protein 5 mRNA, 3 prime UTR	BE104060	Rn.1593	Rn.1593	chr9:71999496-72003902 (-) // 93.37 // q33	insulin-like growth factor binding protein 5	Igfbp5	chr9q33	25285	NM_012817	Smooth_muscle_contraction // GenMAPP
1374758_at	NNN	0.435634	---	---	BM387112	---	1374758_at	1459.66	1830.76	1602.77	808.313	604.466	427.214	580.003	579.206	611.252	205.367	217.174	Rn.3315.1	gb:BM387112 /DB_XREF=gi:18187165 /DB_XREF=UI-R-CN1-cji-o-12-0-UI.s1 /CLONE=UI-R-CN1-cji-o-12-0-UI /FEA=EST /CNT=7 /TID=Rn.3315.1 /TIER=Stack /STK=6 /UG=Rn.3315 /UG_TITLE=ESTs	BM387112	Rn.3315	Rn.3315	chr7:91747064-91747715 (+) // 90.04 // q31	Transcribed locus	---	---	0	---	---
1371421_at	NNN	0.434134	LOC678860 /// LOC690109	LOC678860 /// LOC690109	BM391873	chr2q16	1371421_at	3424.71	4019.49	4194.89	2172.98	1586.83	1116.82	1495.17	1288.3	1447.86	610.044	731.524	Rn.3784.1	gb:BM391873 /DB_XREF=gi:18191926 /DB_XREF=UI-R-DO1-cmk-l-18-0-UI.s1 /CLONE=UI-R-DO1-cmk-l-18-0-UI /FEA=EST /CNT=36 /TID=Rn.3784.1 /TIER=Stack /STK=26 /UG=Rn.3784 /UG_TITLE=ESTs, Highly similar to SCOT_HUMAN SUCCINYL-COA:3-KETOACID-COENZYME A TRANSFERASE PRECURSOR (H.sapiens)	BM391873	Rn.3784	Rn.98472	chr2:53189404-53217852 (+) // 98.38 // q16	similar to 3-oxoacid CoA transferase 1	LOC678860 /// LOC690109	chr2q16	0	XM_001053611 /// XM_001053666 /// XM_001073299	---
1373074_at	NNN	0.433214	RGD1307279	RGD1307279	AI171367	chr18q12.3	1373074_at	1079.03	1267.03	1070.94	642.411	588.923	388.22	283.583	399.729	539.447	265.106	218.391	Rn.16742.1	gb:AI171367 /DB_XREF=gi:3711407 /DB_XREF=EST217323 /CLONE=RMUBJ79 /FEA=EST /CNT=13 /TID=Rn.16742.1 /TIER=Stack /STK=9 /UG=Rn.16742 /UG_TITLE=ESTs	AI171367	Rn.16742	Rn.16742	chr18:81524262-81526603 (-) // 99.38 // q12.3	similar to RIKEN cDNA 2700002I20	RGD1307279	chr18q12.3	307210	NM_001008343	---
1372144_at	NNN	0.432257	Dnajb5_predicted	DNAJB5_PREDICTED	BM386741	chr5q22	1372144_at	235.899	211.071	315.195	148.164	83.9194	69.6223	82.8559	118.521	72.8175	34.233	108.615	Rn.4189.1	gb:BM386741 /DB_XREF=gi:18186794 /DB_XREF=UI-R-CN1-cjg-j-08-0-UI.s1 /CLONE=UI-R-CN1-cjg-j-08-0-UI /FEA=EST /CNT=16 /TID=Rn.4189.1 /TIER=Stack /STK=13 /UG=Rn.4189 /UG_TITLE=ESTs	BM386741	Rn.4189	Rn.92865	chr5:59446181-59446615 (+) // 95.38 // q22	DnaJ (Hsp40) homolog, subfamily B, member 5 (predicted)	Dnajb5_predicted	chr5q22	313811	NM_001108004 /// XM_001061825 /// XM_233767	---
1369939_at	NNN	0.431581	Cycs	CYCS	AI104240	chr4q24	1369939_at	16951.1	19475.2	17142.8	14198.6	8854.29	5630.04	4880.63	7581.35	8362.84	1328.86	5529.66	Rn.2202.1	gb:AI104240 /DB_XREF=gi:3708632 /DB_XREF=EST213529 /CLONE=RHEBZ22 /FEA=FLmRNA /CNT=112 /TID=Rn.2202.1 /TIER=Stack /STK=15 /UG=Rn.2202 /LL=25309 /UG_GENE=Cycs /UG_TITLE=Cytochrome C, expressed in somatic tissues /FL=gb:NM_012839.1	AI104240	Rn.2202	Rn.161841	chr1:73095834-73096806 (-) // 66.83 // q21 /// chr2:94945497-94946454 (-) // 66.83 // q23 /// chr4:78825794-78828002 (-) // 92.98 // q24 /// chr10:36579472-36580386 (-) // 63.18 // q22 /// chr18:63216075-63217298 (-) // 86.1 // q12.1 /// chr19:26189686-26190685 (-) // 66.19 // q11	cytochrome c, somatic	Cycs	chr4q24	25309	NM_012839	---
1373937_at	NNN	0.43142	Fyco1_predicted	FYCO1_PREDICTED	AA799661	chr8q32	1373937_at	1182.89	1356.42	1135.36	673.951	417.363	360.466	433.834	394.933	455.68	475.249	294.122	Rn.17744.1	gb:AA799661 /DB_XREF=gi:4131426 /DB_XREF=EST189158 /CLONE=RHEAD70 /FEA=EST /CNT=10 /TID=Rn.17744.1 /TIER=Stack /STK=7 /UG=Rn.17744 /UG_TITLE=ESTs	AA799661	Rn.17744	Rn.17744	chr8:128543887-128544516 (-) // 99.68 // q32	FYVE and coiled-coil domain containing 1 (predicted)	Fyco1_predicted	chr8q32	301085	NM_001106870 /// XM_001078714 /// XM_236739	---
1398417_at	NNN	0.430539	Fem1a	FEM1A	BE104341	chr9q11	1398417_at	2211.9	1918.85	2307.33	1229.55	865.812	719.16	782.549	718.744	718.734	664.261	472.656	Rn.11909.1	gb:BE104341 /DB_XREF=gi:8496441 /DB_XREF=UI-R-BX0-arn-f-08-0-UI.s1 /CLONE=UI-R-BX0-arn-f-08-0-UI /FEA=EST /CNT=14 /TID=Rn.11909.1 /TIER=Stack /STK=10 /UG=Rn.11909 /UG_TITLE=ESTs, Moderately similar to T50619 hypothetical protein DKFZp762M136.1 (H.sapiens)	BE104341	Rn.11909	Rn.216489	chrUn:25512649-25513151 (-) // 95.85 //	feminization 1 homolog a (C. elegans)	Fem1a	chr9q11	316131	NM_001025706	---
1373249_at	NNN	0.430169	Ubl4a_predicted	UBL4A_PREDICTED	AA817861	chrXq37	1373249_at	434.109	479.744	374.239	307.759	159.634	131.708	115.787	180.84	175.79	125.008	130.119	Rn.1138.1	gb:AA817861 /DB_XREF=gi:4198385 /DB_XREF=UI-R-A0-ae-h-06-0-UI.s1 /CLONE=UI-R-A0-ae-h-06-0-UI /FEA=EST /CNT=10 /TID=Rn.1138.1 /TIER=Stack /STK=9 /UG=Rn.1138 /UG_TITLE=ESTs	AA817861	Rn.1138	Rn.1138	chrX:160241583-160242147 (+) // 75.18 // q37	ubiquitin-like 4a (predicted)	Ubl4a_predicted	chrXq37	293864	NM_001106346 /// XM_001055202 /// XM_215228	---
1372135_at	NNN	0.429647	LOC684352 /// Ptk9l_predicted	LOC684352 /// PTK9L_PREDICTED	AI171452	chr20q11	1372135_at	751.024	766.966	1075.81	741.754	499.788	406.261	164.954	424.192	322.87	269.542	348.908	Rn.2450.1	gb:AI171452 /DB_XREF=gi:3711492 /DB_XREF=EST217414 /CLONE=RMUBL13 /FEA=EST /CNT=16 /TID=Rn.2450.1 /TIER=Stack /STK=13 /UG=Rn.2450 /UG_TITLE=ESTs, Highly similar to T46362 probable tyrosine kinase DKFZp434O0516.1 (H.sapiens)	AI171452	Rn.2450	Rn.218510	chr3:99559659-99560471 (-) // 87.89 // q34	protein tyrosine kinase 9-like (A6-related protein) (predicted) /// similar to twinfilin-like protein	LOC684352 /// Ptk9l_predicted	chr20q11	0	NM_001106390 /// XM_001060043 /// XM_001070490 /// XM_001070530 /// XM_228196	---
1388274_at	NNN	0.429609	Bmyc	BMYC	AA849035	chr3p13	1388274_at	96.8745	140.213	153.468	24.6938	53.3057	8.3539	23.1102	24.815	104.757	17.532	1.83943	Rn.11204.1	gb:AA849035 /DB_XREF=gi:2936575 /DB_XREF=EST191797 /CLONE=RLUAJ78 /FEA=DNA /CNT=13 /TID=Rn.11204.1 /TIER=Stack /STK=7 /UG=Rn.11204 /UG_TITLE=Rat Bmyc gene 5-fragment	AA849035	Rn.11204	Rn.11204	chr3:3864887-3865704 (+) // 97.96 // p13	brain expressed myelocytomatosis oncogene	Bmyc	chr3p13	311807	NM_001013163	---
1386306_at	NNN	0.428001	---	---	AI639138	---	1386306_at	369.95	255.626	344.618	159.424	158.053	99.6155	65.3832	128.465	147.436	47.2443	258.492	Rn.44145.1	gb:AI639138 /DB_XREF=gi:4700172 /DB_XREF=rx04403s /CLONE=rx04403 /FEA=EST /CNT=1 /TID=Rn.44145.1 /TIER=ConsEnd /STK=1 /UG=Rn.44145 /UG_TITLE=EST, Weakly similar to B48013 proline-rich proteoglycan 2 precursor, parotid - rat (R.norvegicus)	AI639138	---	---	---	---	---	---	0	---	---
1371794_at	NNN	0.427253	LOC688018	LOC688018	BM391449	---	1371794_at	1181.53	1212.28	1046.44	855.404	475.101	363.497	349.946	411.377	505.838	448.126	440.348	Rn.6467.1	gb:BM391449 /DB_XREF=gi:18191502 /DB_XREF=UI-R-DY0-ckr-i-01-0-UI.s1 /CLONE=UI-R-DY0-ckr-i-01-0-UI /FEA=EST /CNT=19 /TID=Rn.6467.1 /TIER=Stack /STK=16 /UG=Rn.6467 /UG_TITLE=ESTs, Moderately similar to T14273 zinc finger protein 106 - mouse (M.musculus)	BM391449	Rn.6467	Rn.162688	chr1:53727499-53728168 (+) // 93.12 // q12 /// chr3:106999648-107000317 (-) // 100.0 // q35	similar to SH3-domain binding protein 3	LOC688018	---	688018	XR_009418	---
1371298_at	NNN	0.424942	---	---	BF284168	---	1371298_at	7889.89	13213	15154.6	9872.03	6025.53	6219.73	1411.85	6054.06	4044.62	190.709	88.7897	Rn.3968.1	gb:BF284168 /DB_XREF=gi:11215238 /DB_XREF=EST448759 /CLONE=RGIEL78 /FEA=EST /CNT=87 /TID=Rn.3968.1 /TIER=Stack /STK=73 /UG=Rn.3968 /UG_TITLE=ESTs, Highly similar to T46486 chromosomal protein CAPC homolog DKFZp434F205.1 (H.sapiens)	BF284168	Rn.3968	Rn.218726	chr1:202822925-202823900 (-) // 97.4 // q41	CDNA clone IMAGE:7460165	---	---	0	---	---
1390546_at	NNN	0.421061	---	---	BI289684	---	1390546_at	291.968	214.765	522.127	346.583	209.587	140.701	108.723	112.249	172.243	37.9999	37.2684	Rn.15292.1	gb:BI289684 /DB_XREF=gi:14947519 /DB_XREF=UI-R-DK0-cfi-h-08-0-UI.s1 /CLONE=UI-R-DK0-cfi-h-08-0-UI /FEA=EST /CNT=5 /TID=Rn.15292.1 /TIER=ConsEnd /STK=4 /UG=Rn.15292 /UG_TITLE=ESTs	BI289684	Rn.15292	Rn.15292	chr10:82777929-82778481 (+) // 91.29 // q26	Transcribed locus	---	---	0	---	---
1398343_at	NNN	0.419555	LOC498996	LOC498996	AI104324	chr1p11	1398343_at	1280.81	1521.23	1872.82	930.353	678.79	467.786	493.811	664.585	483.006	773.824	541.273	Rn.27927.1	gb:AI104324 /DB_XREF=gi:3704960 /DB_XREF=EST213613 /CLONE=RHECA37 /FEA=EST /CNT=32 /TID=Rn.27927.1 /TIER=Stack /STK=13 /UG=Rn.27927 /UG_TITLE=ESTs	AI104324	Rn.27927	Rn.196543	chr1:28059384-28060003 (+) // 39.35 // p11 /// chr8:58266548-58268039 (+) // 98.48 // q24	similar to DnaJ (Hsp40) homolog, subfamily A, member 4	LOC498996	chr1p11	498996	XR_006633 /// XR_007683	---
1387805_at	NNN	0.41864	Bnip3	BNIP3	NM_053420	chr1q41	1387805_at	3472.07	3130.76	2568.39	1997.65	905.105	540.533	1157.16	875.295	1470.73	353.281	1306.74	Rn.2060.1	gb:NM_053420.1 /DB_XREF=gi:16758159 /GEN=Bnip3 /FEA=FLmRNA /CNT=70 /TID=Rn.2060.1 /TIER=FL+Stack /STK=6 /UG=Rn.2060 /LL=84480 /DEF=Rattus norvegicus BCL2adenovirus E1B 19 kDa-interacting protein 3, nuclear gene for mitochondrial product (Bnip3), mRNA. /PROD=BCL2adenovirus E1B 19 kDa-interacting protein3, nuclear gene /FL=gb:AF243515.1 gb:NM_053420.1	NM_053420	Rn.2060	Rn.2060	chr1:198683001-198700089 (-) // 97.08 // q41 /// chr9:45749637-45751231 (-) // 96.08 // q22	BCL2/adenovirus E1B 19 kDa-interacting protein 3	Bnip3	chr1q41	84480	NM_053420	---
1392105_at	NNN	0.417196	---	---	AW527533	---	1392105_at	291.906	354.558	275.211	218.258	116.427	124.091	64.6536	94.1654	136.409	59.4471	11.071	Rn.2877.1	gb:AW527533 /DB_XREF=gi:7169947 /DB_XREF=UI-R-BO1-ajv-d-04-0-UI.s1 /CLONE=UI-R-BO1-ajv-d-04-0-UI /FEA=EST /CNT=2 /TID=Rn.2877.1 /TIER=ConsEnd /STK=2 /UG=Rn.2877 /UG_TITLE=ESTs	AW527533	Rn.2877	Rn.2877	chr1:7981853-7982343 (-) // 100.0 // p13	Transcribed locus	---	---	0	---	---
1372720_at	NNN	0.416785	Btbd1	BTBD1	AA848449	chr1q31	1372720_at	1961.43	2650.44	1949.04	1443.59	1050.74	778.363	605.127	685.174	950.611	516.011	650.54	Rn.6364.1	gb:AA848449 /DB_XREF=gi:4131644 /DB_XREF=EST191209 /CLONE=RKIAC42 /FEA=EST /CNT=26 /TID=Rn.6364.1 /TIER=Stack /STK=10 /UG=Rn.6364 /UG_TITLE=ESTs	AA848449	Rn.6364	Rn.162445	chr1:138006526-138007797 (-) // 95.2 // q31	BTB (POZ) domain containing 1	Btbd1	chr1q31	293060	NM_001011932 /// XM_001067480	---
1373351_at	NNN	0.415868	Ank2	ANK2	BI286775	chr2q42	1373351_at	351.457	299.157	167.238	152.87	72.3706	105.344	85.9725	50.5508	105.164	52.8323	141.255	Rn.26749.1	gb:BI286775 /DB_XREF=gi:14941745 /DB_XREF=UI-R-CT0s-car-f-09-0-UI.s1 /CLONE=UI-R-CT0s-car-f-09-0-UI /FEA=EST /CNT=9 /TID=Rn.26749.1 /TIER=Stack /STK=9 /UG=Rn.26749 /UG_TITLE=ESTs	BI286775	Rn.26749	Rn.133131	chr2:224180616-224181006 (-) // 88.56 // q42	ankyrin 2, neuronal	Ank2	chr2q42	362036	XM_001076082 /// XM_342337	---
1368839_at	NNN	0.412018	Wfs1	WFS1	AI407433	chr14q21	1368839_at	659.178	785.529	554.765	337.971	297.396	193.314	215.139	246.304	213.725	328.75	390.145	Rn.16015.1	gb:AI407433 /DB_XREF=gi:4250937 /DB_XREF=EST235722 /CLONE=ROVDQ17 /FEA=FLmRNA /CNT=16 /TID=Rn.16015.1 /TIER=Stack /STK=8 /UG=Rn.16015 /LL=83725 /UG_GENE=Wfs1 /UG_TITLE=Wolfram syndrome 1 (wolframin) /FL=gb:NM_031823.1 gb:AF136378.1	AI407433	Rn.16015	Rn.16015	chr14:79387246-79404745 (+) // 98.08 // q21	Wolfram syndrome 1 homolog (human)	Wfs1	chr14q21	83725	NM_031823	---
1390004_at	NNN	0.410913	---	---	BI291316	---	1390004_at	55.6511	49.7289	203.719	50.7405	42.7518	43.196	20.5654	21.7045	46.8782	17.7498	5.65223	Rn.76408.1	gb:BI291316 /DB_XREF=gi:14950740 /DB_XREF=UI-R-CV2-cgo-d-06-0-UI.s1 /CLONE=UI-R-CV2-cgo-d-06-0-UI /FEA=EST /CNT=7 /TID=Rn.76408.1 /TIER=Stack /STK=7 /UG=Rn.76408 /UG_TITLE=ESTs	BI291316	Rn.76408	Rn.212021	chr2:153483371-153483924 (-) // 72.88 // q31	Transcribed locus	---	---	0	---	---
1371380_at	NNN	0.408941	LOC685778 /// Pdha1	LOC685778 /// PDHA1	AI411413	chr16q12.5 /// chrXq21	1371380_at	8305.41	7402.15	8567.24	4545.58	3590.39	2162.24	3202.98	2525.11	2712.94	2006.04	2500.82	Rn.3655.1	gb:AI411413 /DB_XREF=gi:4254917 /DB_XREF=EST239707 /CLONE=RKIES88 /FEA=EST /CNT=39 /TID=Rn.3655.1 /TIER=Stack /STK=30 /UG=Rn.3655 /UG_TITLE=ESTs	AI411413	Rn.3655	Rn.3655	chrX:55912657-55913320 (+) // 96.65 // q21 /// chr16:87958213-87958875 (-) // 96.21 // q12.5	pyruvate dehydrogenase E1 alpha 1 /// pyruvate dehydrogenase E1 alpha 1 pseudogene	LOC685778 /// Pdha1	chr16q12.5 /// chrXq21	0	NM_001004072 /// XM_001060860 /// XM_001060918 /// XM_001067950 /// XM_001067997	Acetylcholine_Synthesis // GenMAPP /// Glycolysis_and_Gluconeogenesis // GenMAPP /// Krebs-TCA_Cycle // GenMAPP
1370852_at	NNN	0.408355	LOC171573	LOC171573	AA851958	chr8q21	1370852_at	52.56	71.9841	67.9324	48.806	4.03722	45.5177	3.77489	2.58165	28.2679	9.05989	7.88617	Rn.8438.1	gb:AA851958 /DB_XREF=gi:2939498 /DB_XREF=EST194727 /CLONE=RSPAO81 /FEA=FLmRNA /CNT=11 /TID=Rn.8438.1 /TIER=Stack /STK=7 /UG=Rn.8438 /LL=171573 /UG_GENE=LOC171573 /UG_TITLE=spleen protein 1 precursor /FL=gb:AF198442.1	AA851958	Rn.8438	Rn.8438	chr8:37773471-37776295 (+) // 95.32 // q21	spleen protein 1 precursor	LOC171573	chr8q21	171573	NM_138537	---
1373854_at	NNN	0.404712	---	---	AI175795	---	1373854_at	894.134	1147.49	1175.37	584.685	402.091	310.854	386.483	255.866	407.848	213.599	406.271	Rn.3583.1	gb:AI175795 /DB_XREF=gi:3726433 /DB_XREF=EST219365 /CLONE=ROVBF52 /FEA=EST /CNT=12 /TID=Rn.3583.1 /TIER=Stack /STK=7 /UG=Rn.3583 /UG_TITLE=ESTs	AI175795	Rn.3583	Rn.3583	chr19:41062926-41063625 (+) // 99.71 // q12	Transcribed locus	---	---	0	---	---
1375405_at	NNN	0.401945	---	---	BF405058	---	1375405_at	34.303	4.53943	33.4413	10.1626	31.0405	8.00813	4.7302	21.7775	1.97654	2.50869	2.30555	Rn.64406.1	gb:BF405058 /DB_XREF=gi:11393033 /DB_XREF=UI-R-CA1-bip-b-04-0-UI.s1 /CLONE=UI-R-CA1-bip-b-04-0-UI /FEA=EST /CNT=9 /TID=Rn.64406.1 /TIER=Stack /STK=9 /UG=Rn.64406 /UG_TITLE=ESTs	BF405058	Rn.64406	Rn.173160	chr13:60989254-60989604 (-) // 95.88 // q21	Transcribed locus	---	---	0	---	---
1369030_at	NNN	0.400568	Prss1	PRSS1	NM_012635	chr4q22	1369030_at	78.5876	120.693	118.818	8.98726	79.3892	9.30378	15.5997	71.4328	33.9207	108.534	7.75685	Rn.34435.1	gb:NM_012635.1 /DB_XREF=gi:6981419 /GEN=Prss1 /FEA=FLmRNA /CNT=5 /TID=Rn.34435.1 /TIER=FL /STK=2 /UG=Rn.34435 /LL=24691 /DEF=Rattus norvegicus Pancreatic trypsin 1 (Prss1), mRNA. /PROD=pancreatic trypsin 1 /FL=gb:NM_012635.1	NM_012635	Rn.34435	Rn.34435	chr4:69185875-69189080 (+) // 100.0 // q22	pancreatic trypsin 1	Prss1	chr4q22	24691	NM_012635	---
1391007_s_at	NNN	0.399866	Kcnj11	KCNJ11	BE113377	chr1q22	1391007_s_at	260.82	470.576	368.306	279.621	165.988	109.658	76.3979	156.42	151.858	57.6877	5.35865	Rn.64567.1	gb:BE113377 /DB_XREF=gi:8505482 /DB_XREF=UI-R-BJ1-awe-f-08-0-UI.s1 /CLONE=UI-R-BJ1-awe-f-08-0-UI /FEA=EST /CNT=4 /TID=Rn.64567.1 /TIER=ConsEnd /STK=3 /UG=Rn.64567 /UG_TITLE=ESTs	BE113377	Rn.64567	Rn.3985	chr1:96614962-96615488 (-) // 71.74 // q22	potassium inwardly rectifying channel, subfamily J, member 11	Kcnj11	chr1q22	83535	NM_031358	---
1375990_a_at	NNN	0.397657	---	---	BF284519	---	1375990_a_at	891.491	729.672	839.707	440.746	276.175	200.341	169.545	356.305	284.746	266.479	119.739	Rn.34609.2	gb:BF284519 /DB_XREF=gi:11215589 /DB_XREF=EST449110 /CLONE=RGIER54 /FEA=EST /CNT=3 /TID=Rn.34609.2 /TIER=ConsEnd /STK=1 /UG=Rn.34609 /UG_TITLE=ESTs	BF284519	Rn.34609	Rn.34609	chr8:106060218-106061236 (-) // 86.82 // q31	Transcribed locus	---	---	0	---	---
1373886_at	NNN	0.397621	Reep1_predicted	REEP1_PREDICTED	BF284692	chr4q33	1373886_at	342.486	293.081	384.069	130.632	89.7074	110.818	39.1669	146.472	97.9742	20.5357	23.2168	Rn.11891.1	gb:BF284692 /DB_XREF=gi:11215762 /DB_XREF=EST449283 /CLONE=RGIEV02 /FEA=EST /CNT=11 /TID=Rn.11891.1 /TIER=Stack /STK=7 /UG=Rn.11891 /UG_TITLE=ESTs	BF284692	Rn.11891	Rn.11891	chr4:105099097-105099853 (+) // 98.05 // q33	receptor accessory protein 1 (predicted)	Reep1_predicted	chr4q33	362384	NM_001108633 /// XM_001069307 /// XM_342708	---
1373903_at	NNN	0.394326	Rcsd1_predicted	RCSD1_PREDICTED	AI011920	chr13q23	1373903_at	707.563	525.562	563.48	513.801	147.23	148.111	196.348	194.125	236.704	19.7762	32.4059	Rn.14510.1	gb:AI011920 /DB_XREF=gi:3225752 /DB_XREF=EST206371 /CLONE=RPLAQ46 /FEA=EST /CNT=13 /TID=Rn.14510.1 /TIER=Stack /STK=7 /UG=Rn.14510 /UG_TITLE=ESTs, Moderately similar to WDR1_MOUSE WD-REPEAT PROTEIN 1 (ACTIN INTERACTING PROTEIN 1) (M.musculus)	AI011920	Rn.14510	Rn.99138	chr13:81370794-81378271 (-) // 84.02 // q23	RCSD domain containing 1 (predicted)	Rcsd1_predicted	chr13q23	360872	NM_001108349 /// XM_001071544 /// XM_001071584 /// XM_341147	---
1368375_a_at	NNN	0.393826	Il15	IL15	AF015718	chr19q11	1368375_a_at	362.757	321.36	235.005	213.14	109.177	99.7442	113.836	93.2704	84.278	51.1626	131.325	Rn.2490.2	gb:AF015718.1 /DB_XREF=gi:2738729 /GEN=IL-15 /FEA=FLmRNA /CNT=1 /TID=Rn.2490.2 /TIER=FL /STK=1 /UG=Rn.2490 /LL=25670 /DEF=Rattus norvegicus interleukin-15 alternative-splice product (IL-15) mRNA, complete cds. /PROD=interleukin-15 alternative-splice product /FL=gb:AF015718.1	AF015718	Rn.2490	Rn.2490	chr19:27488386-27498973 (+) // 97.51 // q11	interleukin 15	Il15	chr19q11	25670	NM_013129	---
1390020_at	NNN	0.39143	LOC360975	LOC360975	BI277513	chr14q21	1390020_at	4990.44	3945.91	5316.78	2587.83	1629.61	1686.17	1101.43	1362.38	1633.96	1777.08	1418.05	Rn.3648.1	gb:BI277513 /DB_XREF=gi:14923460 /DB_XREF=UI-R-CY0-bxs-a-11-0-UI.s1 /CLONE=UI-R-CY0-bxs-a-11-0-UI /FEA=EST /CNT=37 /TID=Rn.3648.1 /TIER=Stack /STK=6 /UG=Rn.3648 /UG_TITLE=ESTs	BI277513	Rn.3648	Rn.45991	chr14:87090893-87091645 (+) // 97.79 // q21	similar to oxoglutarate dehydrogenase (lipoamide)	LOC360975	chr14q21	360975	NM_001017461	---
1374988_at	NNN	0.388729	---	---	BF390848	---	1374988_at	86.7489	44.0434	58.9671	20.2194	22.4169	10.5713	6.73379	44.417	10.549	5.31769	7.26036	Rn.63145.1	gb:BF390848 /DB_XREF=gi:11375695 /DB_XREF=UI-R-CA1-bci-b-08-0-UI.s1 /CLONE=UI-R-CA1-bci-b-08-0-UI /FEA=EST /CNT=6 /TID=Rn.63145.1 /TIER=Stack /STK=6 /UG=Rn.63145 /UG_TITLE=ESTs	BF390848	Rn.63145	Rn.63145	chr11:36949760-36950297 (-) // 99.81 // q12	Transcribed locus	---	---	0	---	---
1369361_at	NNN	0.387715	Kl	KL	NM_031336	chr12p12	1369361_at	49.3443	56.9484	118.232	62.1183	10.7056	12.3453	22.7942	4.61087	52.4787	10.6785	3.83737	Rn.30061.1	gb:NM_031336.1 /DB_XREF=gi:13786167 /GEN=Kl /FEA=FLmRNA /CNT=2 /TID=Rn.30061.1 /TIER=FL /STK=2 /UG=Rn.30061 /LL=83504 /DEF=Rattus norvegicus Klotho (Kl), mRNA. /PROD=Klotho /FL=gb:NM_031336.1 gb:AB017820.1	NM_031336	Rn.30061	Rn.30061	chr12:3732711-3772371 (-) // 99.86 // p12	Klotho	Kl	chr12p12	83504	NM_031336	---
1373839_at	NNN	0.38756	Nope_predicted	NOPE_PREDICTED	BG372386	chr8q24	1373839_at	704.449	823.664	751.52	339.243	250.161	344.371	113.79	212.578	218.802	91.4903	53.7944	Rn.7944.1	gb:BG372386 /DB_XREF=gi:13268923 /DB_XREF=UI-R-CV1-bsc-b-07-0-UI.s1 /CLONE=UI-R-CV1-bsc-b-07-0-UI /FEA=EST /CNT=13 /TID=Rn.7944.1 /TIER=Stack /STK=7 /UG=Rn.7944 /UG_TITLE=ESTs	BG372386	Rn.7944	Rn.164673	chr8:69383115-69383839 (+) // 99.86 // q24	neighbor of Punc E11 (predicted)	Nope_predicted	chr8q24	363081	NM_001108767 /// XM_001076376 /// XM_343412	---
1368505_at	NNN	0.385988	Rgs4	RGS4	NM_017214	chr13q24	1368505_at	516.544	763.132	483.181	232.13	154.06	108.292	209.492	185.432	160.39	55.0574	56.567	Rn.11065.1	gb:NM_017214.1 /DB_XREF=gi:8394182 /GEN=Rgs4 /FEA=FLmRNA /CNT=42 /TID=Rn.11065.1 /TIER=FL /STK=4 /UG=Rn.11065 /LL=29480 /DEF=Rattus norvegicus regulator of G-protein signaling 4 (Rgs4), mRNA. /PROD=regulator of G-protein signaling 4 /FL=gb:AF117211.1 gb:U27767.1 gb:NM_017214.1	NM_017214	Rn.11065	Rn.11065	chr13:85533876-85540173 (-) // 91.74 // q24	regulator of G-protein signaling 4	Rgs4	chr13q24	29480	NM_017214	Calcium_regulation_in_cardiac_cells // GenMAPP /// Smooth_muscle_contraction // GenMAPP
1370764_a_at	NNN	0.384969	Tg	TG	M35965	chr7q33	1370764_a_at	134.309	88.7939	187.579	11.3551	79.8796	12.221	16.7725	33.3734	92.2112	190.517	14.0884	Rn.10429.2	gb:M35965.1 /DB_XREF=gi:206813 /FEA=FLmRNA /CNT=1 /TID=Rn.10429.2 /TIER=FL /STK=1 /UG=Rn.10429 /LL=24826 /UG_GENE=Tg /UG_TITLE=Thyroglobulin /DEF=Rat thyroglobulin (rTg-2) mRNA, complete cds. /FL=gb:M35965.1	M35965	Rn.10429	Rn.10429	chr7:104035815-104042973 (+) // 99.78 // q33	thyroglobulin	Tg	chr7q33	24826	NM_030988	---
1372548_at	NNN	0.38146	---	---	AI412018	---	1372548_at	590.903	223.422	324.463	336	101.662	130.767	81.2237	182.735	86.3563	56.8712	216.833	Rn.21150.1	gb:AI412018 /DB_XREF=gi:4255522 /DB_XREF=EST240312 /CLONE=RKIEH17 /FEA=EST /CNT=14 /TID=Rn.21150.1 /TIER=Stack /STK=11 /UG=Rn.21150 /UG_TITLE=ESTs	AI412018	Rn.21150	Rn.21150	chr3:76800938-76801828 (-) // 96.09 // q24	Transcribed locus, strongly similar to XP_999783.1 PREDICTED: similar to cryptochrome 2 (photolyase-like) isoform 5 [Mus musculus]	---	---	0	---	---
1368790_at	NNN	0.379903	Serpina10	SERPINA10	NM_133617	chr6q32	1368790_at	159.907	69.0089	101.46	46.4955	22.1743	12.6995	20.9563	23.6901	63.9332	18.4758	4.3295	Rn.10502.1	gb:NM_133617.1 /DB_XREF=gi:19424335 /GEN=Serpina10 /FEA=FLmRNA /CNT=3 /TID=Rn.10502.1 /TIER=FL /STK=3 /UG=Rn.10502 /LL=171154 /DEF=Rattus norvegicus serine (or cysteine) proteinase inhibitor, clade A (alpha-1 antiproteinase, antitrypsin), member 10 (Serpina10), mRNA. /PROD=serine (or cysteine) proteinase inhibitor, cladeA (alpha-1 antiproteinase, antitrypsin), member 10 /FL=gb:NM_133617.1 gb:U557…	NM_133617	Rn.10502	Rn.10502	chr6:127887683-127893708 (-) // 99.8 // q32	serine (or cysteine) peptidase inhibitor, clade A (alpha-1 antiproteinase, antitrypsin), member 10	Serpina10	chr6q32	171154	NM_133617	---
1388952_at	NNN	0.379314	RGD1307935	RGD1307935	BI277039	chr10q26	1388952_at	394.118	365.57	744.382	346.226	59.8929	75.6764	142.587	133.762	227.626	169.558	87.598	Rn.20446.1	gb:BI277039 /DB_XREF=gi:14922531 /DB_XREF=UI-R-CY0-bxp-g-03-0-UI.s1 /CLONE=UI-R-CY0-bxp-g-03-0-UI /FEA=EST /CNT=10 /TID=Rn.20446.1 /TIER=Stack /STK=10 /UG=Rn.20446 /UG_TITLE=ESTs	BI277039	Rn.20446	Rn.204288	chr10:73101524-73102503 (-) // 97.8 // q26	similar to Hypothetical protein MGC18716	RGD1307935	chr10q26	360583	NM_001014119	---
1388387_at	NNN	0.378251	Ubadc1	UBADC1	BI275880	chr3p13	1388387_at	1698.64	1850.77	1225.48	1117.47	815.933	584.329	356.963	427.365	661.274	523.922	578.575	Rn.6512.1	gb:BI275880 /DB_XREF=gi:14920244 /DB_XREF=UI-R-CX0-bxh-f-06-0-UI.s1 /CLONE=UI-R-CX0-bxh-f-06-0-UI /FEA=EST /CNT=21 /TID=Rn.6512.1 /TIER=Stack /STK=21 /UG=Rn.6512 /UG_TITLE=ESTs	BI275880	Rn.6512	Rn.6512	chr3:4178958-4179552 (-) // 100.0 // p13	ubiquitin associated domain containing 1	Ubadc1	chr3p13	362087	NM_001007742	---
1367659_s_at	NNN	0.377759	Dci	DCI	NM_017306	chr10q12	1367659_s_at	2309.93	2446.14	2002.87	1168.6	660.58	522.46	705.975	718.076	648.877	69.575	288.066	Rn.4005.1	gb:NM_017306.1 /DB_XREF=gi:8393242 /GEN=DCI /FEA=FLmRNA /CNT=34 /TID=Rn.4005.1 /TIER=FL+Stack /STK=28 /UG=Rn.4005 /LL=29740 /DEF=Rattus norvegicus dodecenoyl-Coenzyme A delta isomerase (3,2 trans-enoyl-Coenyme A isomerase) (DCI), mRNA. /PROD=dodecenoyl-Coenzyme A delta isomerase (3,2trans-enoyl-Coenyme A isomerase) /FL=gb:NM_017306.1 gb:M61112.1	NM_017306	Rn.4005	Rn.80835	chr10:13682988-13697174 (+) // 99.08 // q12	dodecenoyl-coenzyme A delta isomerase	Dci	chr10q12	29740	NM_017306	Mitochondrial_fatty_acid_betaoxidation // GenMAPP
1367900_at	NNN	0.377326	Gyg1	GYG1	NM_031043	chr2q24	1367900_at	4018.35	4454.64	3969.97	3148.9	1729.41	1153.27	1257.53	1253.56	1564.25	1081.89	1051.81	Rn.3661.1	gb:NM_031043.1 /DB_XREF=gi:13591968 /GEN=Gyg /FEA=FLmRNA /CNT=22 /TID=Rn.3661.1 /TIER=FL+Stack /STK=13 /UG=Rn.3661 /LL=81675 /DEF=Rattus norvegicus glycogenin (Gyg), mRNA. /PROD=glycogenin /FL=gb:NM_031043.1 gb:AF021343.1	NM_031043	Rn.3661	Rn.3661	chr2:105264656-105304933 (-) // 96.74 // q24	glycogenin 1	Gyg1	chr2q24	81675	NM_031043	Glycogen_Metabolism // GenMAPP
1370918_a_at	NNN	0.375434	Atp5c1	ATP5C1	BI275939	chr17q12.3	1370918_a_at	17860.5	22645.5	17681	13803.4	9354.96	5494.4	5337.92	6511.34	7088.18	7576.16	6250.54	Rn.9723.1	gb:BI275939 /DB_XREF=gi:14920363 /DB_XREF=UI-R-CX0-bxi-c-05-0-UI.s1 /CLONE=UI-R-CX0-bxi-c-05-0-UI /FEA=mRNA /CNT=14 /TID=Rn.9723.1 /TIER=Stack /STK=8 /UG=Rn.9723 /LL=116550 /UG_GENE=Atp5c1 /UG_TITLE=ATP synthase, H+ transporting, mitochondrial F1 complex, gamma polypeptide 1	BI275939	Rn.9723	Rn.63959	chr17:79738980-79761183 (+) // 98.4 // q12.3	ATP synthase, H+ transporting, mitochondrial F1 complex, gamma polypeptide 1	Atp5c1	chr17q12.3	116550	NM_053825	Electron_Transport_Chain // GenMAPP
1371716_at	NNN	0.373729	LOC684513 /// LOC685179	LOC684513 /// LOC685179	BE107610	chr7q11	1371716_at	314.598	558.232	473.713	231.234	187.667	138.936	111.157	148.869	128.875	230.294	243.461	Rn.20004.1	gb:BE107610 /DB_XREF=gi:8499715 /DB_XREF=UI-R-CA0-awv-f-10-0-UI.s1 /CLONE=UI-R-CA0-awv-f-10-0-UI /FEA=EST /CNT=20 /TID=Rn.20004.1 /TIER=Stack /STK=17 /UG=Rn.20004 /UG_TITLE=ESTs	BE107610	Rn.20004	Rn.20004	chr7:1771421-1771951 (+) // 91.7 // q11	similar to SWI/SNF-related matrix-associated actin-dependent regulator of chromatin c2 isoform b /// similar to SWI/SNF-related matrix-associated actin-dependent regulator of chromatin c2	LOC684513 /// LOC685179	chr7q11	0	XM_001055609 /// XM_001055673 /// XM_001055738 /// XM_001055795 /// XM_001070765	---
1390428_at	NNN	0.37177	---	---	BF555924	---	1390428_at	157.077	166.57	301.673	120.217	85.9558	75.299	24.7575	88.804	58.439	93.5158	33.401	Rn.15221.1	gb:BF555924 /DB_XREF=gi:11665654 /DB_XREF=UI-R-A1-dw-d-12-0-UI.r1 /CLONE=UI-R-A1-dw-d-12-0-UI /FEA=EST /CNT=7 /TID=Rn.15221.1 /TIER=ConsEnd /STK=4 /UG=Rn.15221 /UG_TITLE=ESTs	BF555924	---	---	chr14:17671419-17672017 (-) // 70.05 // p22	---	---	---	0	---	---
1386903_at	NNN	0.370726	S100b	S100B	NM_013191	chr20p12	1386903_at	767.619	936.783	866.562	416.352	231.144	229.824	251.435	214.165	259.109	52.2623	74.0731	Rn.8937.1	gb:NM_013191.1 /DB_XREF=gi:6981497 /GEN=S100b /FEA=FLmRNA /CNT=57 /TID=Rn.8937.1 /TIER=FL+Stack /STK=22 /UG=Rn.8937 /LL=25742 /DEF=Rattus norvegicus S100 calcium-binding protein, beta (neural) (S100b), mRNA. /PROD=S100 calcium-binding protein, beta (neural) /FL=gb:M54919.1 gb:NM_013191.1	NM_013191	Rn.8937	Rn.8937	chr20:12791436-12824508 (-) // 99.46 // p12	S100 protein, beta polypeptide	S100b	chr20p12	25742	NM_013191	---
1372606_at	NNN	0.370116	---	---	BM390528	---	1372606_at	3858.93	4982.48	3808.76	3562.34	2496.01	1345.08	834.998	1614.63	1744.75	405.035	2171.47	Rn.16408.1	gb:BM390528 /DB_XREF=gi:18190581 /DB_XREF=UI-R-CN1-cjr-a-21-0-UI.s1 /CLONE=UI-R-CN1-cjr-a-21-0-UI /FEA=EST /CNT=12 /TID=Rn.16408.1 /TIER=Stack /STK=11 /UG=Rn.16408 /UG_TITLE=ESTs	BM390528	Rn.16408	Rn.16408	chr3:54873347-54874006 (+) // 99.25 // q22	Transcribed locus	---	---	0	---	---
1375297_at	NNN	0.368914	RGD1565289_predicted	RGD1565289_PREDICTED	AI168968	chrXq31	1375297_at	1643.24	2002.54	1634.24	1287.03	954.766	484.497	452.724	648.231	634.471	443.551	831.617	Rn.2579.1	gb:AI168968 /DB_XREF=gi:3705276 /DB_XREF=EST214796 /CLONE=RKIBL30 /FEA=EST /CNT=23 /TID=Rn.2579.1 /TIER=Stack /STK=10 /UG=Rn.2579 /UG_TITLE=ESTs	AI168968	Rn.2579	Rn.2579	chrX:81805827-81889548 (+) // 98.04 // q31 /// chr6:81915434-81920323 (+) // 93.56 // q23	similar to RIKEN cDNA 0610008C08 (predicted)	RGD1565289_predicted	chrXq31	363474	XM_343793	---
1367799_at	NNN	0.367703	Eef1a2	EEF1A2	NM_012660	chr3q43	1367799_at	2054.31	535.608	1942.83	550.31	430.23	527.329	215.559	462.221	416.693	127.741	77.8122	Rn.9764.1	gb:NM_012660.1 /DB_XREF=gi:6981595 /GEN=Stnl /FEA=FLmRNA /CNT=21 /TID=Rn.9764.1 /TIER=FL+Stack /STK=17 /UG=Rn.9764 /LL=24799 /DEF=Rattus norvegicus Statin-like protein (Stnl), mRNA. /PROD=statin-like protein /FL=gb:M62751.1 gb:NM_012660.1	NM_012660	Rn.9764	Rn.9764	chr3:170295327-170304292 (-) // 94.67 // q43	eukaryotic translation elongation factor 1 alpha 2	Eef1a2	chr3q43	24799	NM_012660	---
1373652_at	NNN	0.366896	RGD1564833_predicted	RGD1564833_PREDICTED	BG374986	chr13q26	1373652_at	1369.46	1734.18	994.752	503.406	526.077	396.127	248.812	509.608	350.572	419.267	528.973	Rn.23989.1	gb:BG374986 /DB_XREF=gi:13299458 /DB_XREF=UI-R-CV1-bsw-g-08-0-UI.s1 /CLONE=UI-R-CV1-bsw-g-08-0-UI /FEA=EST /CNT=9 /TID=Rn.23989.1 /TIER=Stack /STK=8 /UG=Rn.23989 /UG_TITLE=ESTs	BG374986	Rn.23989	Rn.140701	chr13:95322684-95323168 (+) // 99.18 // q26	similar to 9630058J23Rik protein (predicted)	RGD1564833_predicted	chr13q26	498297	XM_001060344 /// XM_573525	---
1388323_at	NNN	0.365388	Ndufa9	NDUFA9	BG381033	chr4q42	1388323_at	6088.87	7596.48	6990.99	5798.9	3634.14	2618.15	1446.33	2673.52	2063.29	2249.4	1523.13	Rn.1099.1	gb:BG381033 /DB_XREF=gi:13305505 /DB_XREF=UI-R-CT0-bug-d-12-0-UI.s1 /CLONE=UI-R-CT0-bug-d-12-0-UI /FEA=EST /CNT=31 /TID=Rn.1099.1 /TIER=Stack /STK=27 /UG=Rn.1099 /UG_TITLE=ESTs, Moderately similar to NUEM_HUMAN NADH-UBIQUINONE OXIDOREDUCTASE 39 KDA SUBUNIT PRECURSOR (H.sapiens)	BG381033	Rn.1099	Rn.107963	chr4:163208781-163223506 (-) // 88.87 // q42	NADH dehydrogenase (ubiquinone) 1 alpha subcomplex, 9	Ndufa9	chr4q42	362440	XM_001064382	---
1389334_at	NNN	0.364473	LOC316632 /// LOC678759 /// Ndufa10	LOC316632 /// LOC678759 /// NDUFA10	BI277594	chr6q21	1389334_at	1344.5	1905.69	1642.02	620.494	465.714	311.834	465.565	491.689	474.091	539.085	351.188	Rn.12471.1	gb:BI277594 /DB_XREF=gi:14923619 /DB_XREF=UI-R-CY0-bxt-b-03-0-UI.s1 /CLONE=UI-R-CY0-bxt-b-03-0-UI /FEA=EST /CNT=15 /TID=Rn.12471.1 /TIER=Stack /STK=7 /UG=Rn.12471 /UG_TITLE=ESTs, Moderately similar to NADH-ubiquinone oxidoreductase 42 kDa subunit (H.sapiens)	BI277594	Rn.12471	Rn.102304	chr9:91655134-91676484 (-) // 75.09 // q36	NADH dehydrogenase (ubiquinone) 1 alpha subcomplex 10 /// NADH dehydrogenase 1 alpha subcomplex 10-like protein /// hypothetical protein LOC678759	LOC316632 /// LOC678759 /// Ndufa10	chr6q21	0	NM_182671 /// NM_199495 /// XM_001053046	---
1387680_at	NNN	0.36278	Pde1b	PDE1B	AF327906	chr7q36	1387680_at	97.7287	13.5963	34.2577	12.3195	11.5691	9.91431	10.9263	15.7003	12.6437	18.8387	9.92778	Rn.74045.1	gb:AF327906.1 /DB_XREF=gi:13195525 /GEN=Pde1B /FEA=FLmRNA /CNT=5 /TID=Rn.74045.1 /TIER=FL /STK=1 /UG=Rn.74045 /LL=29691 /DEF=Rattus norvegicus clone GB1B21a phosphodiesterase 1B (Pde1B) mRNA, complete cds. /PROD=phosphodiesterase 1B /FL=gb:NM_022710.1 gb:AF327906.1 gb:M94537.1	AF327906	Rn.74045	Rn.53489	chr7:142401488-142427791 (+) // 99.85 // q36	phosphodiesterase 1B, Ca2+calmodulin dependent	Pde1b	chr7q36	29691	NM_022710	G_Protein_Signaling // GenMAPP /// G_Protein_Signaling // GenMAPP /// G_Protein_Signaling // GenMAPP
1389086_at	NNN	0.361417	RGD1564043_predicted	RGD1564043_PREDICTED	BF408444	chr13q26	1389086_at	190.514	184.682	305.553	157.183	128.74	35.1882	71.2006	135.039	38.0693	11.2328	15.4231	Rn.19527.1	gb:BF408444 /DB_XREF=gi:11396419 /DB_XREF=UI-R-BJ2-brc-g-11-0-UI.s1 /CLONE=UI-R-BJ2-brc-g-11-0-UI /FEA=EST /CNT=10 /TID=Rn.19527.1 /TIER=Stack /STK=9 /UG=Rn.19527 /UG_TITLE=ESTs	BF408444	Rn.19527	Rn.19527	chr13:98951041-98951737 (+) // 100.0 // q26	Similar to RIKEN cDNA E430021N18 (predicted)	RGD1564043_predicted	chr13q26	289335	NM_001105982 /// XM_001063664 /// XM_223014	---
1369203_at	NNN	0.35922	Wif1	WIF1	NM_053738	chr7q22	1369203_at	545.41	329.206	457.821	275.647	192.075	105.105	99.6589	127.947	184.611	152.902	79.1169	Rn.74256.1	gb:NM_053738.1 /DB_XREF=gi:16758559 /GEN=Wif1 /FEA=FLmRNA /CNT=4 /TID=Rn.74256.1 /TIER=FL /STK=2 /UG=Rn.74256 /LL=114557 /DEF=Rattus norvegicus Wnt inhibitory factor 1 (Wif1), mRNA. /PROD=Wnt inhibitory factor 1 /FL=gb:AY030278.1 gb:NM_053738.1	NM_053738	Rn.74256	Rn.74256	chr7:60330516-60400696 (+) // 98.72 // q22	Wnt inhibitory factor 1	Wif1	chr7q22	114557	NM_053738	---
1369178_a_at	NNN	0.359111	P2rx1	P2RX1	AF231010	chr10q24	1369178_a_at	54.3737	58.7769	134.126	100.03	41.0351	27.6491	8.48382	42.8541	32.5792	8.71059	14.3409	Rn.9843.2	gb:AF231010.1 /DB_XREF=gi:8163933 /FEA=FLmRNA /CNT=1 /TID=Rn.9843.2 /TIER=FL /STK=1 /UG=Rn.9843 /LL=25505 /UG_GENE=P2rx1 /DEF=Rattus norvegicus P2X1 receptor isoform mRNA, complete cds, alternatively spliced. /PROD=P2X1 receptor isoform /FL=gb:AF231010.1	AF231010	Rn.9843	Rn.91176	chr10:59890133-59903915 (+) // 99.82 // q24	purinergic receptor P2X, ligand-gated ion channel, 1	P2rx1	chr10q24	25505	NM_012997	---
1376302_at	NNN	0.358862	---	---	AA955175	---	1376302_at	200.512	204.125	222.705	143.323	75.1399	64.2673	76.6244	12.5385	89.3914	12.6971	191.452	Rn.19720.1	gb:AA955175 /DB_XREF=gi:4234258 /DB_XREF=UI-R-A1-du-b-04-0-UI.s1 /CLONE=UI-R-A1-du-b-04-0-UI /FEA=EST /CNT=6 /TID=Rn.19720.1 /TIER=ConsEnd /STK=5 /UG=Rn.19720 /UG_TITLE=ESTs	AA955175	Rn.19720	Rn.203515	chr10:77510038-77510533 (-) // 78.56 // q26	Transcribed locus	---	---	0	---	---
1390295_at	NNN	0.358427	RGD1311920_predicted	RGD1311920_PREDICTED	BF390636	chr14q22	1390295_at	98.4579	33.9092	155.039	15.2811	46.7725	13.3471	13.271	13.8864	59.7003	11.6358	45.2407	Rn.32786.1	gb:BF390636 /DB_XREF=gi:11375483 /DB_XREF=UI-R-CA1-bck-e-04-0-UI.s1 /CLONE=UI-R-CA1-bck-e-04-0-UI /FEA=EST /CNT=5 /TID=Rn.32786.1 /TIER=ConsEnd /STK=5 /UG=Rn.32786 /UG_TITLE=ESTs	BF390636	Rn.32786	Rn.105388	chr14:101520765-101521336 (+) // 100.0 // q22	Similar to RIKEN cDNA 9130023F12 gene (predicted)	RGD1311920_predicted	chr14q22	305544	XM_001055784 /// XM_223651	---
1374541_at	NNN	0.357355	LOC687978 /// LOC690987	LOC687978 /// LOC690987	BM392117	chr1q22	1374541_at	1154.6	1034.49	1014.27	675.135	233.504	354.786	161.117	273.453	386.201	437.188	321.131	Rn.22397.1	gb:BM392117 /DB_XREF=gi:18192170 /DB_XREF=UI-R-DO1-ckp-o-09-0-UI.s1 /CLONE=UI-R-DO1-ckp-o-09-0-UI /FEA=EST /CNT=9 /TID=Rn.22397.1 /TIER=Stack /STK=6 /UG=Rn.22397 /UG_TITLE=ESTs, Weakly similar to GLYCOGEN (R.norvegicus)	BM392117	Rn.22397	Rn.95278	chr1:95927464-95928155 (+) // 80.72 // q22	similar to glycogen synthase 1, muscle	LOC687978 /// LOC690987	chr1q22	0	NM_001109615 /// XM_001076910 /// XM_001076928 /// XM_001076950 /// XM_001076978 /// XM_001077000 /// XM_001079274 /// XM_001079287 /// XM_001079300 /// XM_001079314	---
1390210_at	NNN	0.357294	Phka1	PHKA1	BF418932	chrXq31	1390210_at	391.915	487.547	655.081	374.226	203.595	114.604	78.772	189.746	220.666	87.9307	181.21	Rn.16416.1	gb:BF418932 /DB_XREF=gi:11406921 /DB_XREF=UI-R-BJ2-bqk-f-01-0-UI.s1 /CLONE=UI-R-BJ2-bqk-f-01-0-UI /FEA=EST /CNT=6 /TID=Rn.16416.1 /TIER=ConsEnd /STK=5 /UG=Rn.16416 /UG_TITLE=ESTs	BF418932	Rn.16416	Rn.48743	chrX:90552893-90553519 (-) // 100.0 // q31	Phosphorylase kinase alpha 1	Phka1	chrXq31	64561	NM_022626	Glycogen_Metabolism // GenMAPP
1370254_at	NNN	0.354838	Clic5	CLIC5	AI172153	chr9q12	1370254_at	225.653	277.273	161.347	211.752	109.195	73.8907	80.3749	15.8917	109.518	4.43714	2.76514	Rn.1838.1	gb:AI172153 /DB_XREF=gi:3712193 /DB_XREF=EST218148 /CLONE=RMUBV61 /FEA=FLmRNA /CNT=26 /TID=Rn.1838.1 /TIER=Stack /STK=6 /UG=Rn.1838 /LL=94272 /UG_GENE=Clic5 /UG_TITLE=chloride intracellular channel 5 /FL=gb:AF323174.1 gb:NM_053603.1	AI172153	Rn.1838	Rn.1838	chr9:12370341-12472969 (-) // 86.88 // q12	chloride intracellular channel 5	Clic5	chr9q12	94272	NM_053603	---
1372359_at	NNN	0.354214	RGD1310090	RGD1310090	BI291423	chr16q12.3	1372359_at	389.108	1008.73	630.748	378.073	172.569	217.797	45.3795	253.643	214.058	61.2734	73.058	Rn.22231.1	gb:BI291423 /DB_XREF=gi:14950947 /DB_XREF=UI-R-CV2-cgq-b-01-0-UI.s1 /CLONE=UI-R-CV2-cgq-b-01-0-UI /FEA=EST /CNT=14 /TID=Rn.22231.1 /TIER=Stack /STK=12 /UG=Rn.22231 /UG_TITLE=ESTs	BI291423	Rn.22231	Rn.22231	chr16:64952296-64952974 (-) // 100.0 // q12.3	similar to 2310043K02Rik protein	RGD1310090	chr16q12.3	306527	NM_001012352	---
1376592_at	NNN	0.352909	Mcee_predicted	MCEE_PREDICTED	BG379780	chr1q22	1376592_at	1320.07	1694.55	1330.34	1286.62	622.062	383.581	432.935	451.424	497.633	476.395	668.591	Rn.3420.1	gb:BG379780 /DB_XREF=gi:13304257 /DB_XREF=UI-R-CS0-btn-b-11-0-UI.s1 /CLONE=UI-R-CS0-btn-b-11-0-UI /FEA=EST /CNT=13 /TID=Rn.3420.1 /TIER=ConsEnd /STK=4 /UG=Rn.3420 /UG_TITLE=ESTs, Weakly similar to B.subtilis YQJC protein like (Caenorhabditis elegans) (C.elegans)	BG379780	Rn.3420	Rn.3420	chr1:118832985-118856092 (+) // 98.05 // q22	methylmalonyl CoA epimerase (predicted)	Mcee_predicted	chr1q22	293829	NM_001106341 /// XM_001058655 /// XM_215213	---
1371519_at	NNN	0.352495	Etfdh	ETFDH	AA851258	chr2q32	1371519_at	2347.34	2605.36	2002.01	1442.39	851.151	679.815	586.473	647.497	694.188	254.056	445.493	Rn.37277.1	gb:AA851258 /DB_XREF=gi:2938798 /DB_XREF=EST194026 /CLONE=RPLAE49 /FEA=EST /CNT=27 /TID=Rn.37277.1 /TIER=Stack /STK=21 /UG=Rn.37277 /UG_TITLE=ESTs, Highly similar to S41115 probable flavoprotein-ubiquinone oxidoreductase (H.sapiens)	AA851258	Rn.37277	Rn.37277	chr2:171008344-171016452 (-) // 84.79 // q32	electron-transferring-flavoprotein dehydrogenase	Etfdh	chr2q32	295143	NM_198742	---
1370973_at	NNN	0.350913	Scn7a	SCN7A	BF285019	chr3q21	1370973_at	1495.87	856.12	873.652	630.993	199.436	144.56	191.808	243.611	558.684	54.8122	35.6116	Rn.54541.1	gb:BF285019 /DB_XREF=gi:11216089 /DB_XREF=EST449610 /CLONE=RGIEY67 /FEA=mRNA /CNT=28 /TID=Rn.54541.1 /TIER=ConsEnd /STK=3 /UG=Rn.54541 /LL=64155 /UG_GENE=Scn6a /UG_TITLE=sodium channel, voltage-gated, type VI, alpha polypeptide	BF285019	Rn.54541	Rn.54541	chr3:48633173-48710728 (-) // 97.92 // q21	sodium channel, voltage-gated, type VII, alpha	Scn7a	chr3q21	64155	NM_031686	---
1370060_at	NNN	0.350906	Slc25a11	SLC25A11	NM_022398	chr10q24	1370060_at	3516.55	3707.77	3698.25	2618.69	1415.87	1002.09	825.118	1115.67	1255.95	1356.2	1324.85	Rn.853.1	gb:NM_022398.1 /DB_XREF=gi:11693169 /GEN=LOC64201 /FEA=FLmRNA /CNT=24 /TID=Rn.853.1 /TIER=FL+Stack /STK=6 /UG=Rn.853 /LL=64201 /DEF=Rattus norvegicus 2-oxoglutarate carrier (LOC64201), mRNA. /PROD=2-oxoglutarate carrier /FL=gb:NM_022398.1 gb:U84727.1	NM_022398	Rn.853	Rn.853	chr10:57523991-57526676 (-) // 99.67 // q24	solute carrier family 25 (mitochondrial carrier; oxoglutarate carrier), member 11	Slc25a11	chr10q24	64201	NM_022398	---
1386914_at	NNN	0.350607	Gmpr	GMPR	NM_057188	chr17p13	1386914_at	1174.45	1157.19	791.806	714.832	363.117	270.883	307.306	399.889	200.356	127.953	518.013	Rn.3862.1	gb:NM_057188.1 /DB_XREF=gi:17105339 /GEN=Gmpr /FEA=FLmRNA /CNT=29 /TID=Rn.3862.1 /TIER=FL+Stack /STK=20 /UG=Rn.3862 /LL=117533 /DEF=Rattus norvegicus guanosine monophosphate reductase (Gmpr), mRNA. /PROD=guanosine monophosphate reductase /FL=gb:AF090867.1 gb:NM_057188.1	NM_057188	Rn.3862	Rn.3862	chr17:25147546-25185385 (-) // 98.9 // p13	guanosine monophosphate reductase	Gmpr	chr17p13	117533	NM_057188	---
1371976_at	NNN	0.349916	LOC682248 /// LOC685545	LOC682248 /// LOC685545	AI102758	chr10q12	1371976_at	454.742	433.472	605.968	441.911	199.638	119.919	143.353	165.716	168.872	328.133	101.6	Rn.8558.1	gb:AI102758 /DB_XREF=gi:3707447 /DB_XREF=EST212047 /CLONE=REMBS14 /FEA=EST /CNT=18 /TID=Rn.8558.1 /TIER=Stack /STK=14 /UG=Rn.8558 /UG_TITLE=ESTs	AI102758	Rn.8558	Rn.218725	chr10:15129196-15130205 (-) // 99.47 // q12	hypothetical protein LOC682248 /// hypothetical protein LOC685545	LOC682248 /// LOC685545	chr10q12	0	NM_001109475 /// XM_001060664 /// XM_001064248	---
1369287_at	NNN	0.349252	Syt9	SYT9	NM_053324	chr1q33	1369287_at	129.352	64.9792	137.786	24.8499	24.9851	16.0318	65.6935	11.8374	13.1554	26.9977	22.3005	Rn.10194.1	gb:NM_053324.1 /DB_XREF=gi:16758023 /GEN=Sytv /FEA=FLmRNA /CNT=3 /TID=Rn.10194.1 /TIER=FL /STK=2 /UG=Rn.10194 /LL=60564 /DEF=Rattus norvegicus synaptogamin V (Sytv), mRNA. /PROD=synaptogamin V /FL=gb:NM_053324.1 gb:AF375461.1	NM_053324	Rn.10194	Rn.10194	chr1:164722167-164928937 (+) // 100.0 // q33	synaptotagmin IX	Syt9	chr1q33	60564	NM_053324	---
1367694_at	NNN	0.348224	Hadhb	HADHB	NM_133618	chr6q14	1367694_at	10605.2	12078.6	10971.4	7120.13	5684.21	2527.4	3195.8	3422.1	3797.37	3392.11	1795.27	Rn.11253.1	gb:NM_133618.1 /DB_XREF=gi:19424337 /GEN=Hadhb /FEA=FLmRNA /CNT=39 /TID=Rn.11253.1 /TIER=FL+Stack /STK=22 /UG=Rn.11253 /LL=171155 /DEF=Rattus norvegicus hydroxyacyl-Coenzyme A dehydrogenase3-ketoacyl-Coenzyme A thiolaseenoyl-Coenzyme A hydratase (trifunctional protein), beta subunit (Hadhb), mRNA. /PROD=hydroxyacyl-Coenzyme Adehydrogenase3-ketoacyl-Coenzyme Athiolaseenoyl-Coenzyme A hydratase (tr…	NM_133618	Rn.11253	Rn.11253	chr6:26139395-26166947 (-) // 99.22 // q14	hydroxyacyl-Coenzyme A dehydrogenase/3-ketoacyl-Coenzyme A thiolase/enoyl-Coenzyme A hydratase (trifunctional protein), beta subunit	Hadhb	chr6q14	171155	NM_133618	Fatty_Acid_Degradation // GenMAPP
1376388_at	NNN	0.34697	---	---	BF413248	---	1376388_at	95.0858	75.4442	113.102	97.4788	40.5818	48.1069	17.6228	9.49241	41.8297	73.9204	17.5684	Rn.62287.1	gb:BF413248 /DB_XREF=gi:11401237 /DB_XREF=UI-R-BT1-bny-e-12-0-UI.s1 /CLONE=UI-R-BT1-bny-e-12-0-UI /FEA=EST /CNT=5 /TID=Rn.62287.1 /TIER=ConsEnd /STK=5 /UG=Rn.62287 /UG_TITLE=ESTs	BF413248	Rn.62287	Rn.208780	chr2:119271979-119272515 (-) // 96.57 // q25	Transcribed locus	---	---	0	---	---
1370739_x_at	NNN	0.344809	Trdn	TRDN	AF220558	chr1p11	1370739_x_at	272.873	226.919	146.539	121.428	73.993	87.4008	32.5256	55.2166	57.0515	33.7375	28.7237	Rn.41863.2	gb:AF220558.1 /DB_XREF=gi:6851386 /FEA=FLmRNA /CNT=1 /TID=Rn.41863.2 /TIER=FL /STK=1 /UG=Rn.41863 /LL=59299 /UG_GENE=Trdn /DEF=Rattus norvegicus triadin 1 mRNA, complete cds. /PROD=triadin 1 /FL=gb:AF220558.1	AF220558	Rn.41863	Rn.41863	chr1:24854707-24977697 (-) // 98.58 // p11	triadin	Trdn	chr1p11	59299	NM_021666	---
1375642_at	NNN	0.343595	Ube2b	UBE2B	AA892795	chr10q22	1375642_at	2654.71	3949.34	3304.52	1811.56	1346.62	903.732	600.103	816.118	1271.78	824.539	905.431	Rn.3530.2	gb:AA892795 /DB_XREF=gi:3019674 /DB_XREF=EST196598 /CLONE=RKIAX38 /FEA=EST /CNT=20 /TID=Rn.3530.2 /TIER=Stack /STK=6 /UG=Rn.3530 /LL=81816 /UG_GENE=LOC81816 /UG_TITLE=ubiquitin conjugating enzyme	AA892795	Rn.3530	Rn.20766	chr10:37509321-37510499 (-) // 84.3 // q22	ubiquitin-conjugating enzyme E2B, RAD6 homolog (S. cerevisiae)	Ube2b	chr10q22	81816	NM_031138	---
1368893_at	NNN	0.343559	Cap2	CAP2	NM_053874	---	1368893_at	825.738	1259.6	1023.65	514.02	344.784	373.573	88.5301	282.292	346.142	21.8019	26.6312	Rn.10229.1	gb:NM_053874.1 /DB_XREF=gi:16758741 /GEN=Cap2 /FEA=FLmRNA /CNT=14 /TID=Rn.10229.1 /TIER=FL /STK=2 /UG=Rn.10229 /LL=116653 /DEF=Rattus norvegicus adenylyl cyclase-associated protein 2 (Cap2), mRNA. /PROD=adenylyl cyclase-associated protein 2 /FL=gb:NM_053874.1 gb:U31935.1	NM_053874	Rn.10229	Rn.10229	chr17:24114066-24114993 (-) // 39.51 // p13	CAP, adenylate cyclase-associated protein, 2 (yeast)	Cap2	---	116653	NM_053874	---
1375983_at	NNN	0.340168	Mamdc2	MAMDC2	AI234287	chr1q51	1375983_at	199.912	264.565	207.316	76.8602	9.69639	24.0664	5.56758	114.935	61.8045	18.3741	40.8757	Rn.23790.1	gb:AI234287 /DB_XREF=gi:4135983 /DB_XREF=EST230975 /CLONE=RLUCZ12 /FEA=EST /CNT=8 /TID=Rn.23790.1 /TIER=ConsEnd /STK=5 /UG=Rn.23790 /UG_TITLE=ESTs	AI234287	Rn.23790	Rn.23790	chr1:226591002-226591807 (-) // 99.75 // q51	MAM domain containing 2	Mamdc2	chr1q51	309410	XM_001078660 /// XM_219905	---
1388364_at	NNN	0.339544	Ndufs3_predicted	NDUFS3_PREDICTED	BG381650	chr3q24	1388364_at	4225.98	5805.45	4735.3	2952.45	2086.78	1229.92	1293.53	1582.64	1273.91	2912.48	1194.18	Rn.1261.1	gb:BG381650 /DB_XREF=gi:13306122 /DB_XREF=UI-R-CT0-bud-g-08-0-UI.s1 /CLONE=UI-R-CT0-bud-g-08-0-UI /FEA=EST /CNT=29 /TID=Rn.1261.1 /TIER=Stack /STK=22 /UG=Rn.1261 /UG_TITLE=ESTs, Moderately similar to NADH:ubiquinone oxidoreductase NDUFS3 subunit (H.sapiens)	BG381650	Rn.1261	Rn.1261	chr3:75256389-75263404 (-) // 94.99 // q24	NADH dehydrogenase (ubiquinone) Fe-S protein 3 (predicted)	Ndufs3_predicted	chr3q24	295923	NM_001106489 /// XM_001077876 /// XM_215776	---
1372583_at	NNN	0.33906	---	---	AI009094	---	1372583_at	554.945	448.364	459.942	195.667	138.626	150.311	84.1543	115.141	137.974	132.644	99.3462	Rn.13877.1	gb:AI009094 /DB_XREF=gi:3222926 /DB_XREF=EST203545 /CLONE=REMBI53 /FEA=EST /CNT=15 /TID=Rn.13877.1 /TIER=Stack /STK=11 /UG=Rn.13877 /UG_TITLE=ESTs	AI009094	Rn.13877	Rn.13877	chr4:185848072-185849145 (-) // 99.81 // q44	Transcribed locus	---	---	0	---	---
1389265_at	NNN	0.339037	Gbe1	GBE1	BI284270	chr11p11	1389265_at	1531.72	1806.41	1761.16	1009.75	549.839	327.96	267.471	446.354	764.301	313.524	291.266	Rn.29938.1	gb:BI284270 /DB_XREF=gi:14936795 /DB_XREF=UI-R-CX0s-ccq-b-08-0-UI.s1 /CLONE=UI-R-CX0s-ccq-b-08-0-UI /FEA=EST /CNT=8 /TID=Rn.29938.1 /TIER=Stack /STK=8 /UG=Rn.29938 /UG_TITLE=ESTs	BI284270	Rn.29938	Rn.29938	chr11:8974793-8975471 (+) // 99.71 // p11	glucan (1,4-alpha-), branching enzyme 1	Gbe1	chr11p11	288333	XM_001064453 /// XM_221747	---
1387112_at	NNN	0.335575	Plp	PLP	NM_030990	chrXq35	1387112_at	379.452	283.129	205.143	189.466	87.7527	32.033	76.1222	61.0886	138.128	11.7126	5.4129	Rn.4550.1	gb:NM_030990.1 /DB_XREF=gi:13591879 /GEN=Plp1 /FEA=FLmRNA /CNT=25 /TID=Rn.4550.1 /TIER=FL+Stack /STK=7 /UG=Rn.4550 /LL=24943 /DEF=Rattus norvegicus Proteolipid protein (Pelizaeus-Merzbacher disease, spastic paraplegia 2, uncomplicated) (Plp1), mRNA. /PROD=proteolipid protein (Pelizaeus-Merzbacherdisease, spastic paraplegia 2, uncomplicated) /FL=gb:M11185.1 gb:NM_030990.1	NM_030990	Rn.4550	Rn.4550	chrX:124488626-124503643 (+) // 98.36 // q35	proteolipid protein	Plp	chrXq35	24943	NM_030990	---
1374006_at	NNN	0.333188	Kat3	KAT3	BI295878	chr2q44	1374006_at	382.057	429.089	371.34	203.587	109.478	42.4298	75.1324	170.631	110.447	56.0992	169.74	Rn.28263.1	gb:BI295878 /DB_XREF=gi:14959765 /DB_XREF=UI-R-DK0-cfb-g-06-0-UI.s1 /CLONE=UI-R-DK0-cfb-g-06-0-UI /FEA=EST /CNT=9 /TID=Rn.28263.1 /TIER=Stack /STK=7 /UG=Rn.28263 /UG_TITLE=ESTs, Weakly similar to S48737 kynurenine aminotransferase - rat (R.norvegicus)	BI295878	Rn.28263	Rn.28263	chr2:240849385-240857564 (+) // 80.57 // q44	kynurenine aminotransferase III	Kat3	chr2q44	541589	NM_001015037 /// XM_001062489	---
1375349_at	NNN	0.332588	LOC678826 /// Sorbs1_predicted	LOC678826 /// SORBS1_PREDICTED	BI295776	chr1q53	1375349_at	2035.34	1684.46	2055.91	1186.77	756.098	591.027	396.762	532.406	533.49	187.76	271.662	Rn.12763.1	gb:BI295776 /DB_XREF=gi:14959552 /DB_XREF=UI-R-DK0-cfa-d-11-0-UI.s1 /CLONE=UI-R-DK0-cfa-d-11-0-UI /FEA=EST /CNT=24 /TID=Rn.12763.1 /TIER=Stack /STK=9 /UG=Rn.12763 /UG_TITLE=ESTs	BI295776	Rn.12763	Rn.110441	chr1:245417170-245418687 (-) // 89.9 // q53	similar to sorbin and SH3 domain containing 1 isoform 3 /// sorbin and SH3 domain containing 1 (predicted)	LOC678826 /// Sorbs1_predicted	chr1q53	0	XM_001053355 /// XM_001066536	---
1387373_at	NNN	0.332116	Pde4dip	PDE4DIP	NM_022382	chr2q34	1387373_at	2121.02	497.94	1585.85	1154.83	430.142	447.117	179.954	550.565	360.669	80.2752	119.645	Rn.48693.1	gb:NM_022382.1 /DB_XREF=gi:11693143 /GEN=LOC64183 /FEA=FLmRNA /CNT=8 /TID=Rn.48693.1 /TIER=FL /STK=2 /UG=Rn.48693 /LL=64183 /DEF=Rattus norvegicus myomegalin (LOC64183), mRNA. /PROD=myomegalin /FL=gb:AF139185.1 gb:NM_022382.1	NM_022382	Rn.48693	Rn.48693	chr2:192534745-192671218 (-) // 99.34 // q34	phosphodiesterase 4D interacting protein (myomegalin)	Pde4dip	chr2q34	64183	NM_022382	---
1386598_at	NNN	0.331594	Art1_predicted	ART1_PREDICTED	BF557807	chr1q32	1386598_at	1045.24	838.791	1535.64	859.13	404.317	324.83	190.554	411.743	315.188	523.547	184.523	Rn.6493.2	gb:BF557807 /DB_XREF=gi:11667537 /DB_XREF=UI-R-C0-gw-e-05-0-UI.r1 /CLONE=UI-R-C0-gw-e-05-0-UI /FEA=EST /CNT=1 /TID=Rn.6493.2 /TIER=ConsEnd /STK=0 /UG=Rn.6493 /UG_TITLE=ESTs, Weakly similar to T-CELL ECTO-ADP-RIBOSYLTRANSFERASE 1 PRECURSOR (R.norvegicus)	BF557807	Rn.6493	Rn.6493	chr1:159587028-159587431 (+) // 100.0 // q32	ADP-ribosyltransferase 1 (predicted)	Art1_predicted	chr1q32	308873	NM_001107541 /// XM_001068204 /// XM_218975	---
1374986_x_at	NNN	0.330109	Lce1s_predicted /// RGD1561089_predicted	LCE1S_PREDICTED /// RGD1561089_PREDICTED	BI281143	chr2q34	1374986_x_at	4692.76	6728	8504.98	3437.14	3246.24	2233.8	1009.65	1979.08	1804.59	404.026	415.461	Rn.30313.1	gb:BI281143 /DB_XREF=gi:14930581 /DB_XREF=UI-R-DD0-bzr-g-09-0-UI.s1 /CLONE=UI-R-DD0-bzr-g-09-0-UI /FEA=EST /CNT=6 /TID=Rn.30313.1 /TIER=Stack /STK=6 /UG=Rn.30313 /UG_TITLE=ESTs, Weakly similar to UHS KerB (Homo sapiens) (H.sapiens)	BI281143	Rn.30313	---	chr2:185776577-185777090 (-) // 71.43 // q34 /// chr2:185765366-185765875 (-) // 73.28 // q34	RGD1561089 (predicted) /// late cornified envelope 1S (predicted)	Lce1s_predicted /// RGD1561089_predicted	chr2q34	0	XM_001056240 /// XM_001066389	---
1386880_at	NNN	0.327596	Acaa2	ACAA2	NM_130433	chr18q12.3	1386880_at	5039.99	4667.06	3710.76	2407.3	1619.65	1103.53	1017.15	1169.59	1281.6	925.632	256.065	Rn.3786.1	gb:NM_130433.1 /DB_XREF=gi:18426865 /GEN=Acaa2 /FEA=FLmRNA /CNT=46 /TID=Rn.3786.1 /TIER=FL+Stack /STK=30 /UG=Rn.3786 /LL=170465 /DEF=Rattus norvegicus acetyl-Coenzyme A acyltransferase 2 (mitochondrial 3-oxoacyl-Coenzyme A thiolase) (Acaa2), mRNA. /PROD=acetyl-Coenzyme A acyltransferase 2(mitochondrial 3-oxoacyl-Coenzyme A thiolase) /FL=gb:NM_130433.1	NM_130433	Rn.3786	Rn.3786	chr18:71587258-71632611 (+) // 95.78 // q12.3	acetyl-Coenzyme A acyltransferase 2 (mitochondrial 3-oxoacyl-Coenzyme A thiolase)	Acaa2	chr18q12.3	170465	NM_130433	Fatty_Acid_Degradation // GenMAPP /// Fatty_Acid_Synthesis // GenMAPP /// Mitochondrial_fatty_acid_betaoxidation // GenMAPP
1377104_at	NNN	0.326878	---	---	AI175978	---	1377104_at	29.3839	32.511	51.0787	5.66106	20.6801	3.36941	4.55607	11.986	16.5197	3.92981	27.8186	Rn.8500.1	gb:AI175978 /DB_XREF=gi:3726616 /DB_XREF=EST219554 /CLONE=ROVBH91 /FEA=EST /CNT=5 /TID=Rn.8500.1 /TIER=ConsEnd /STK=4 /UG=Rn.8500 /UG_TITLE=ESTs	AI175978	Rn.8500	Rn.8500	chr16:20022191-20022608 (-) // 42.21 // p14	Transcribed locus	---	---	0	---	---
1389781_at	NNN	0.326717	Elmod1_predicted	ELMOD1_PREDICTED	AI412625	chr8q24	1389781_at	276.329	429.759	264.363	114.107	131.977	41.2326	60.7411	97.9021	118.095	39.3876	15.6549	Rn.13823.1	gb:AI412625 /DB_XREF=gi:4256129 /DB_XREF=EST240924 /CLONE=RBRDL14 /FEA=EST /CNT=6 /TID=Rn.13823.1 /TIER=Stack /STK=6 /UG=Rn.13823 /UG_TITLE=ESTs	AI412625	Rn.13823	Rn.13823	chr8:57392724-57393134 (-) // 95.78 // q24	ELMO domain containing 1 (predicted)	Elmod1_predicted	chr8q24	315670	XR_008801	---
1370930_at	NNN	0.324501	---	---	BF417285	---	1370930_at	1465.29	1578.21	1858.83	645.509	587.51	368.686	229.227	441.505	553.321	960.097	472.351	Rn.15980.1	gb:BF417285 /DB_XREF=gi:11405274 /DB_XREF=UI-R-CN0-bky-c-05-0-UI.s1 /CLONE=UI-R-CN0-bky-c-05-0-UI /FEA=mRNA /CNT=33 /TID=Rn.15980.1 /TIER=Stack /STK=7 /UG=Rn.15980 /UG_TITLE=Rattus norvegicus mRNA for a novel kinesin-related protein, KIF1D	BF417285	---	---	chr10:57580645-57623554 (+) // 89.43 // q24	---	---	---	0	---	---
1372168_s_at	NNN	0.3232	Igfbp6	IGFBP6	BG673588	chr7q36	1372168_s_at	1041.06	2930.39	2799.78	1052.9	443.858	486.745	648.99	596.437	405.595	165.601	34.9693	Rn.6431.1	gb:BG673588 /DB_XREF=gi:13895687 /DB_XREF=DRN06G10 /CLONE=DRN06G10 /FEA=EST /CNT=15 /TID=Rn.6431.1 /TIER=Stack /STK=13 /UG=Rn.6431 /UG_TITLE=ESTs, Highly similar to IBP6 RAT INSULIN-LIKE GROWTH FACTOR BINDING PROTEIN 6 PRECURSOR (R.norvegicus)	BG673588	Rn.6431	Rn.6431	chr7:140889716-140890053 (+) // 88.45 // q36	insulin-like growth factor binding protein 6	Igfbp6	chr7q36	25641	NM_013104	Smooth_muscle_contraction // GenMAPP
1389964_at	NNN	0.323066	LOC683884 /// Ndufab1_predicted	LOC683884 /// NDUFAB1_PREDICTED	AA944343	chr1q36	1389964_at	7603.46	8069.1	8088.17	4504.78	5143.24	1681.02	2028.19	2358.72	2566.65	3147.47	2404.72	Rn.1318.1	gb:AA944343 /DB_XREF=gi:3104259 /DB_XREF=EST199842 /CLONE=REMAF65 /FEA=EST /CNT=45 /TID=Rn.1318.1 /TIER=Stack /STK=7 /UG=Rn.1318 /UG_TITLE=ESTs, Moderately similar to T00741 NADH dehydrogenase (H.sapiens)	AA944343	Rn.1318	Rn.1318	chr1:180912005-180921720 (-) // 97.2 // q36	NADH dehydrogenase (ubiquinone) 1, alpha/beta subcomplex, 1 (predicted) /// similar to Acyl carrier protein, mitochondrial precursor (ACP) (NADH-ubiquinone oxidoreductase 9.6 kDa subunit) (CI-SDAP)	LOC683884 /// Ndufab1_predicted	chr1q36	0	NM_001106294 /// XM_001067919 /// XM_001079490 /// XM_215044	---
1369927_at	NNN	0.321966	Mdh2	MDH2	NM_031151	chr12q12	1369927_at	8064.96	9221.15	9450.45	6619.62	5394.88	1921.97	2293.66	2860.96	2904.62	7388.78	3126.75	Rn.1011.1	gb:NM_031151.1 /DB_XREF=gi:13592144 /GEN=Mor1 /FEA=FLmRNA /CNT=73 /TID=Rn.1011.1 /TIER=FL+Stack /STK=54 /UG=Rn.1011 /LL=81829 /DEF=Rattus norvegicus malate dehydrogenase mitochondrial (Mor1), mRNA. /PROD=malate dehydrogenase mitochondrial /FL=gb:NM_031151.1	NM_031151	Rn.1011	Rn.1011	chr12:22021294-22034211 (-) // 94.25 // q12	malate dehydrogenase 2, NAD (mitochondrial)	Mdh2	chr12q12	81829	NM_031151	Glycolysis_and_Gluconeogenesis // GenMAPP /// Krebs-TCA_Cycle // GenMAPP
1388935_at	NNN	0.321431	Ppp1r12b_predicted	PPP1R12B_PREDICTED	AI231814	chr13q13	1388935_at	669.081	699.773	660.475	369.921	173.32	133.725	183.692	135.147	208.959	188.027	129.231	Rn.17657.1	gb:AI231814 /DB_XREF=gi:3815694 /DB_XREF=EST228502 /CLONE=RHECO60 /FEA=EST /CNT=12 /TID=Rn.17657.1 /TIER=Stack /STK=10 /UG=Rn.17657 /UG_TITLE=ESTs	AI231814	Rn.17657	Rn.68116	chr13:47704651-47705474 (-) // 99.88 // q13	Protein phosphatase 1, regulatory (inhibitor) subunit 12B (predicted)	Ppp1r12b_predicted	chr13q13	304813	NM_001107178 /// XM_001062402 /// XM_222656	---
1383203_at	NNN	0.318868	RGD1559748_predicted	RGD1559748_PREDICTED	AI145631	chr3q41	1383203_at	5121.2	5588.61	3426.2	4067.84	4756.06	1062.6	130.981	2456.5	2206.86	288.25	82.7965	Rn.6623.1	gb:AI145631 /DB_XREF=gi:3667430 /DB_XREF=UI-R-BT0-ps-e-07-0-UI.s1 /CLONE=UI-R-BT0-ps-e-07-0-UI /FEA=EST /CNT=8 /TID=Rn.6623.1 /TIER=ConsEnd /STK=0 /UG=Rn.6623 /UG_TITLE=ESTs, Weakly similar to S17447 probable ligand-binding protein RY2G5 - rat (R.norvegicus)	AI145631	Rn.6623	Rn.6623	chr3:144551398-144554452 (+) // 88.29 // q41	similar to Palate lung and nasal carcinoma-like protein precursor (Tongue plunc-like protein) (predicted)	RGD1559748_predicted	chr3q41	311559	NM_001107792 /// XM_001064379 /// XM_230758	---
1388496_at	NNN	0.318568	Flnc_predicted	FLNC_PREDICTED	AI103600	chr4q22	1388496_at	1207.58	1475.79	1428.88	575.965	642.026	476.66	164.425	302.696	414.654	139.209	85.5623	Rn.22352.1	gb:AI103600 /DB_XREF=gi:3708129 /DB_XREF=EST212889 /CLONE=REMCE01 /FEA=EST /CNT=19 /TID=Rn.22352.1 /TIER=Stack /STK=16 /UG=Rn.22352 /UG_TITLE=ESTs, Weakly similar to A37098 gelation factor ABP-280, long form (H.sapiens)	AI103600	Rn.22352	Rn.22352	chr4:56340984-56341396 (+) // 93.0 // q22	filamin C, gamma (actin binding protein 280) (predicted)	Flnc_predicted	chr4q22	362332	XM_001061717 /// XM_001061768 /// XM_001061822 /// XM_342653	---
1370795_at	NNN	0.318324	Foxc2	FOXC2	L13193	---	1370795_at	10.6502	48.1275	69.7077	60.7574	2.79872	4.26453	3.81561	20.8819	19.943	2.84617	9.68801	Affx.1.69	gb:L13193.1 /DB_XREF=gi:310156 /FEA=FLmRNA /CNT=1 /TID=Affx.1.69 /TIER=FL /STK=1 /NOTE=sequence(s) not in UniGene /DEF=Rattus norvegicus brain factor-3 (HFH-BF-3) mRNA, complete cds. /PROD=brain factor-3 /FL=gb:L13193.1	L13193	---	Rn.216723	chr17:39029084-39029386 (-) // 91.09 // p12	forkhead box C2	Foxc2	---	171356	NM_001101680 /// XM_001079064	---
1372123_at	NNN	0.31629	Sdhb_predicted	SDHB_PREDICTED	AI172320	chr5q36	1372123_at	9211.96	9912.64	9210.52	6456.9	4204.74	2596.78	2033.1	2720.7	2516.86	2496.11	1539.79	Rn.3902.1	gb:AI172320 /DB_XREF=gi:4134738 /DB_XREF=EST218321 /CLONE=RMUBX76 /FEA=EST /CNT=20 /TID=Rn.3902.1 /TIER=Stack /STK=13 /UG=Rn.3902 /UG_TITLE=ESTs, Highly similar to SUCCINATE DEHYDROGENASE (R.norvegicus)	AI172320	Rn.3902	Rn.3902	chr5:159833402-159839772 (+) // 100.0 // q36	succinate dehydrogenase complex, subunit B, iron sulfur (Ip) (predicted)	Sdhb_predicted	chr5q36	298596	XM_001071846 /// XM_216558	Electron_Transport_Chain // GenMAPP
1374904_at	NNN	0.316104	Six1	SIX1	AI175048	chr6q24	1374904_at	427.683	643.341	561.118	374.197	152.076	77.6021	84.8768	151.966	231.382	22.1654	142.055	Rn.23396.1	gb:AI175048 /DB_XREF=gi:4134765 /DB_XREF=EST218566 /CLONE=RMUCB51 /FEA=EST /CNT=7 /TID=Rn.23396.1 /TIER=Stack /STK=6 /UG=Rn.23396 /UG_TITLE=ESTs	AI175048	Rn.23396	Rn.23396	chr6:95470279-95471171 (-) // 99.55 // q24	sine oculis homeobox homolog 1 (Drosophila)	Six1	chr6q24	114634	XM_001080688 /// XM_343079	---
1368380_at	NNN	0.315825	Vtn	VTN	NM_019156	chr10q25	1368380_at	442.551	399.023	270.089	260.547	78.3639	59.3839	66.0278	164.174	76.9159	47.4711	3.73427	Rn.9585.1	gb:NM_019156.1 /DB_XREF=gi:9507240 /GEN=Vtn /FEA=FLmRNA /CNT=6 /TID=Rn.9585.1 /TIER=FL+Stack /STK=6 /UG=Rn.9585 /LL=29169 /DEF=Rattus norvegicus vitronectin (Vtn), mRNA. /PROD=vitronectin /FL=gb:U44845.1 gb:NM_019156.1	NM_019156	Rn.9585	Rn.87493	chr10:64609251-64612320 (+) // 99.37 // q25	vitronectin	Vtn	chr10q25	29169	NM_019156	Inflammatory_Response_Pathway // GenMAPP /// Inflammatory_Response_Pathway // GenMAPP
1388112_at	NNN	0.315442	Slc25a4	SLC25A4	BG666999	chr16q11	1388112_at	26586.2	27635	23171.8	19367.1	10677.6	7810.25	4986.87	6866.23	7448.97	5956.65	5716.2	Rn.4092.1	gb:BG666999 /DB_XREF=gi:13888921 /DB_XREF=DRABKC11 /CLONE=DRABKC11 /FEA=mRNA /CNT=82 /TID=Rn.4092.1 /TIER=Stack /STK=49 /UG=Rn.4092 /LL=85333 /UG_GENE=Slc25a4 /UG_TITLE=solute carrier family 25 (mitochondrial adenine nucleotide translocator) member 4	BG666999	Rn.4092	Rn.4092	chr16:49353468-49357275 (+) // 99.85 // q11	solute carrier family 25 (mitochondrial carrier; adenine nucleotide translocator), member 4	Slc25a4	chr16q11	85333	NM_053515	Electron_Transport_Chain // GenMAPP
1387344_at	NNN	0.314768	Aldh6a1	ALDH6A1	AI407458	chr6q31	1387344_at	581.464	760.12	747.622	160.762	141.364	106.407	150.993	205.476	139.297	37.4026	253.427	Rn.2098.1	gb:AI407458 /DB_XREF=gi:4250962 /DB_XREF=EST235747 /CLONE=ROVDT49 /FEA=FLmRNA /CNT=36 /TID=Rn.2098.1 /TIER=Stack /STK=21 /UG=Rn.2098 /LL=81708 /UG_GENE=Mmsdh /UG_TITLE=methylmalonate semialdehyde dehydrogenase gene /FL=gb:M93401.1 gb:NM_031057.1	AI407458	Rn.2098	Rn.2098	chr6:108495765-108516389 (-) // 97.48 // q31	aldehyde dehydrogenase family 6, subfamily A1	Aldh6a1	chr6q31	81708	NM_031057	---
1370117_at	NNN	0.313414	Fgf8	FGF8	NM_133286	chr1q54	1370117_at	38.9513	35.9872	105.629	46.0587	12.9017	9.55556	10.2789	8.56035	31.6622	10.1952	19.2244	Rn.73565.1	gb:NM_133286.1 /DB_XREF=gi:18959219 /GEN=Fgf8 /FEA=FLmRNA /CNT=3 /TID=Rn.73565.1 /TIER=FL /STK=1 /UG=Rn.73565 /DEF=Rattus norvegicus fibroblast growth factor 8 (androgen-induced) (Fgf8), mRNA. /PROD=fibroblast growth factor 8 /FL=gb:NM_133286.1 gb:AB079113.1	NM_133286	Rn.73565	Rn.73565	chr1:250950847-250956730 (-) // 96.58 // q54	fibroblast growth factor 8	Fgf8	chr1q54	29349	NM_133286	---
1367735_at	NNN	0.311414	Acadl	ACADL	NM_012819	chr9q32	1367735_at	5180.24	5717.28	4210.8	3450.43	2306.86	849.665	1350.68	1547.66	1450.25	2324.39	1144.88	Rn.174.1	gb:NM_012819.1 /DB_XREF=gi:6978430 /GEN=Acadl /FEA=FLmRNA /CNT=30 /TID=Rn.174.1 /TIER=FL+Stack /STK=19 /UG=Rn.174 /LL=25287 /DEF=Rattus norvegicus Acyl Coenzyme A dehydrogenase, long chain (Acadl), mRNA. /PROD=acyl Coenzyme A dehydrogenase, long chain /FL=gb:NM_012819.1 gb:J05029.1 gb:L11276.1	NM_012819	Rn.174	Rn.174	chr9:65613118-65647198 (-) // 91.64 // q32	acetyl-Coenzyme A dehydrogenase, long-chain	Acadl	chr9q32	25287	NM_012819	Fatty_Acid_Degradation // GenMAPP /// Mitochondrial_fatty_acid_betaoxidation // GenMAPP
1372457_at	NNN	0.311308	Mtus1	MTUS1	BF284182	chr16q12.1	1372457_at	1302.97	1381.61	1360.64	647.116	515.434	429.205	230.486	327.992	309.293	244.635	158.884	Rn.24538.1	gb:BF284182 /DB_XREF=gi:11215252 /DB_XREF=EST448773 /CLONE=RGIEM14 /FEA=EST /CNT=18 /TID=Rn.24538.1 /TIER=Stack /STK=11 /UG=Rn.24538 /UG_TITLE=ESTs	BF284182	Rn.24538	Rn.95344	chr16:54662555-54663722 (+) // 99.14 // q12.1	mitochondrial tumor suppressor 1	Mtus1	chr16q12.1	306487	NM_178093 /// XM_001064538 /// XM_573915	---
1373909_at	NNN	0.311228	---	---	AI175507	---	1373909_at	377.65	416.89	444.911	305.304	253.211	158.547	37.0129	141.282	110.82	15.9907	88.2957	Rn.3984.1	gb:AI175507 /DB_XREF=gi:3726145 /DB_XREF=EST219059 /CLONE=RMUCO35 /FEA=EST /CNT=12 /TID=Rn.3984.1 /TIER=Stack /STK=7 /UG=Rn.3984 /UG_TITLE=ESTs	AI175507	---	---	chr5:29806356-29807278 (+) // 99.89 // q13	---	---	---	0	---	---
1374558_at	NNN	0.31066	---	---	AI010316	---	1374558_at	238.945	566.818	675.994	385.787	347.82	242.662	6.91248	168.973	132.032	6.75539	7.35022	Rn.17428.1	gb:AI010316 /DB_XREF=gi:3224148 /DB_XREF=EST204767 /CLONE=RLUBX06 /FEA=EST /CNT=9 /TID=Rn.17428.1 /TIER=Stack /STK=6 /UG=Rn.17428 /UG_TITLE=ESTs	AI010316	Rn.17428	Rn.203823	chr20:10948854-10949385 (-) // 87.63 // p12	Transcribed locus	---	---	0	---	---
1382959_at	NNN	0.308308	---	---	AA891058	---	1382959_at	139.691	148.713	173.115	106.294	26.2875	32.898	40.669	8.69044	64.2756	55.8794	6.05964	Rn.19936.1	gb:AA891058 /DB_XREF=gi:4132006 /DB_XREF=EST194861 /CLONE=RHEAO48 /FEA=EST /CNT=2 /TID=Rn.19936.1 /TIER=ConsEnd /STK=1 /UG=Rn.19936 /UG_TITLE=ESTs	AA891058	Rn.19936	Rn.166477	chrX:55914538-55914997 (+) // 99.56 // q21	Transcribed locus	---	---	0	---	---
1371665_at	NNN	0.30442	Smarcd3	SMARCD3	BG380496	chr4q11	1371665_at	1069.25	793.059	851.932	534.008	294.319	238.729	119.459	270.227	234.329	83.7398	442.938	Rn.20043.1	gb:BG380496 /DB_XREF=gi:13304968 /DB_XREF=UI-R-CT0-btx-h-10-0-UI.s1 /CLONE=UI-R-CT0-btx-h-10-0-UI /FEA=EST /CNT=20 /TID=Rn.20043.1 /TIER=Stack /STK=18 /UG=Rn.20043 /UG_TITLE=ESTs, Moderately similar to JC6508 brahma related gene associated factor BAF60 b protein - rat (R.norvegicus)	BG380496	Rn.20043	Rn.20043	chr4:5958425-5959795 (+) // 98.29 // q11	SWI/SNF related, matrix associated, actin dependent regulator of chromatin, subfamily d, member 3	Smarcd3	chr4q11	296732	NM_001011966	---
1386901_at	NNN	0.304331	RGD1562323_predicted	RGD1562323_PREDICTED	NM_031561	chr4q11	1386901_at	5139.2	6342.22	4413.59	3158.33	1788.24	1009.8	1254.4	1512.3	1297.69	157.529	92.2355	Rn.3790.1	gb:NM_031561.1 /DB_XREF=gi:13928759 /GEN=Cd36 /FEA=FLmRNA /CNT=38 /TID=Rn.3790.1 /TIER=FL+Stack /STK=23 /UG=Rn.3790 /LL=29184 /DEF=Rattus norvegicus CD36 antigen (collagen type I receptor, thrombospondin receptor) (Cd36), mRNA. /PROD=CD36 antigen /FL=gb:AF072411.1 gb:NM_031561.1 gb:L19658.1 gb:AF113914.1	NM_031561	Rn.3790	Rn.203220	chr4:13471877-13554419 (+) // 99.14 // q11 /// chr4:13487281-13670270 (+) // 96.79 // q11 /// chr4:13481324-13525620 (+) // 86.65 // q11	similar to fatty acid translocase/CD36 (predicted)	RGD1562323_predicted	chr4q11	499984	XM_575338	---
1369543_s_at	NNN	0.303558	Gs3	GS3	NM_138856	chr2q16	1369543_s_at	275.217	505.007	428.227	392.385	166.09	118.045	59.9951	146.493	104.557	88.9514	169.329	Affx.1.13	gb:NM_138856.1 /DB_XREF=gi:20302007 /GEN=Gs3 /FEA=FLmRNA /CNT=2 /TID=Affx.1.13 /TIER=FL /STK=2 /NOTE=sequence(s) not in UniGene /DEF=Rattus norvegicus putative regulation protein GS3 (Gs3), mRNA. /PROD=putative regulation protein GS3 /FL=gb:NM_138856.1 gb:AF492384.1	NM_138856	---	Rn.53644	chr2:59796394-59813207 (-) // 97.53 // q16	putative regulation protein GS3	Gs3	chr2q16	192210	NM_138856 /// XM_001056176 /// XM_001060252	---
1388410_at	NNN	0.302568	Ugp2	UGP2	AI170679	chr14q22	1388410_at	8676.88	10348.6	9687.94	4326.71	2494.32	2273.55	1791.43	1860.89	2675.38	2478.26	2046.45	Rn.3415.1	gb:AI170679 /DB_XREF=gi:3710719 /DB_XREF=EST216615 /CLONE=RMUAZ84 /FEA=EST /CNT=23 /TID=Rn.3415.1 /TIER=Stack /STK=19 /UG=Rn.3415 /UG_TITLE=ESTs, Highly similar to UDP-glucose pyrophosphorylase 2; UTP-glucose-1-phosphate uridyltransferase; UDP-glucose diphosphorylase; UGPase 2 (Homo sapiens) (H.sapiens)	AI170679	Rn.3415	Rn.3415	chr14:102072722-102080698 (-) // 89.59 // q22	UDP-glucose pyrophosphorylase 2	Ugp2	chr14q22	289827	NM_001024743	---
1374659_at	NNN	0.301983	LOC363153 /// RGD1307215	LOC363153 /// RGD1307215	AI227963	chr8q32	1374659_at	137.875	298.024	219.851	191.06	111.944	51.4953	10.6278	62.4371	107.061	7.77842	5.81774	Rn.7511.1	gb:AI227963 /DB_XREF=gi:3811850 /DB_XREF=EST224658 /CLONE=RBRCO13 /FEA=EST /CNT=8 /TID=Rn.7511.1 /TIER=Stack /STK=6 /UG=Rn.7511 /UG_TITLE=ESTs	AI227963	Rn.7511	Rn.7511	chr8:116674797-116675383 (-) // 95.9 // q32	similar to cyclic AMP-regulated phosphoprotein, 21 isoform 2 /// similar to protein phosphatase 1, regulatory (inhibitory) subunit 1C; thymocyte ARPP; DNA segment, Chr 9, Brigham & Womens Genetics 1012 expressed	LOC363153 /// RGD1307215	chr8q32	0	XM_001076474 /// XM_343492	---
1390656_at	NNN	0.301918	---	---	BF389473	---	1390656_at	61.9179	54.5275	84.2437	55.4553	5.2466	19.7733	4.00192	33.5533	5.80644	3.52565	10.1643	Rn.64376.1	gb:BF389473 /DB_XREF=gi:11374306 /DB_XREF=UI-R-CJ0-bfc-b-11-0-UI.s1 /CLONE=UI-R-CJ0-bfc-b-11-0-UI /FEA=EST /CNT=4 /TID=Rn.64376.1 /TIER=ConsEnd /STK=4 /UG=Rn.64376 /UG_TITLE=ESTs	BF389473	Rn.64376	Rn.161410	chr2:153117890-153118435 (+) // 99.82 // q31	Transcribed locus	---	---	0	---	---
1389772_at	NNN	0.300597	---	---	AI575785	---	1389772_at	294.283	317.839	362.218	147.062	124.019	47.4231	59.6062	126.022	66.4445	12.316	36.2324	Rn.48930.1	gb:AI575785 /DB_XREF=gi:4560161 /DB_XREF=UI-R-G0-ue-g-05-0-UI.s1 /CLONE=UI-R-G0-ue-g-05-0-UI /FEA=EST /CNT=6 /TID=Rn.48930.1 /TIER=Stack /STK=6 /UG=Rn.48930 /UG_TITLE=ESTs	AI575785	Rn.48930	Rn.48930	chr18:56551261-56551716 (-) // 100.0 // q12.1	Transcribed locus	---	---	0	---	---
1368721_at	NNN	0.300512	Ascl2	ASCL2	NM_031503	chr1q41	1368721_at	136.691	170.739	230.351	63.1639	64.2922	38.9868	17.3876	79.103	24.4522	146.771	12.6111	Rn.10486.1	gb:NM_031503.1 /DB_XREF=gi:13928685 /GEN=Ascl2 /FEA=FLmRNA /CNT=4 /TID=Rn.10486.1 /TIER=FL /STK=3 /UG=Rn.10486 /LL=24209 /DEF=Rattus norvegicus Achaete-scute homolog 2 (Ascl2), mRNA. /PROD=achaete-scute homolog 2 /FL=gb:NM_031503.1	NM_031503	Rn.10486	Rn.10486	chr1:203242128-203244480 (-) // 99.28 // q41	achaete-scute complex homolog-like 2 (Drosophila)	Ascl2	chr1q41	24209	NM_031503	---
1388804_at	NNN	0.29882	---	---	BI300986	---	1388804_at	801.043	487.005	390.326	343.056	171.551	108.426	114.817	166.85	134.153	306.439	154.265	Rn.16035.1	gb:BI300986 /DB_XREF=gi:14977266 /DB_XREF=UI-R-DK0-cfk-e-04-0-UI.s2 /CLONE=UI-R-DK0-cfk-e-04-0-UI /FEA=EST /CNT=14 /TID=Rn.16035.1 /TIER=Stack /STK=11 /UG=Rn.16035 /UG_TITLE=ESTs	BI300986	Rn.16035	Rn.16035	chr12:45315888-45316648 (-) // 100.0 // q16	Transcribed locus	---	---	0	---	---
1374789_at	NNN	0.298026	---	---	BF550398	---	1374789_at	430.318	571.44	432.606	243.471	139.329	70.8336	45.6541	146.263	170.499	87.8118	74.9587	Rn.15476.1	gb:BF550398 /DB_XREF=gi:11660128 /DB_XREF=UI-R-A1-ef-h-10-0-UI.r1 /CLONE=UI-R-A1-ef-h-10-0-UI /FEA=EST /CNT=7 /TID=Rn.15476.1 /TIER=Stack /STK=6 /UG=Rn.15476 /UG_TITLE=ESTs	BF550398	Rn.15476	Rn.15476	chr16:81137203-81137795 (+) // 76.35 // q12.5 /// chr8:62619448-62620036 (+) // 70.27 // q24	Transcribed locus	---	---	0	---	---
1375445_at	NNN	0.297616	Ky_predicted	KY_PREDICTED	BG375795	chr8q32	1375445_at	880.566	172.197	350.222	106.802	142.348	57.6114	98.164	94.6673	142.919	222.192	46.9826	Rn.24084.1	gb:BG375795 /DB_XREF=gi:13300267 /DB_XREF=UI-R-CS0-btf-e-06-0-UI.s1 /CLONE=UI-R-CS0-btf-e-06-0-UI /FEA=EST /CNT=11 /TID=Rn.24084.1 /TIER=Stack /STK=8 /UG=Rn.24084 /UG_TITLE=ESTs	BG375795	Rn.24084	Rn.24084	chr8:107509728-107510652 (+) // 96.61 // q32	kyphoscoliosis (predicted)	Ky_predicted	chr8q32	315962	NM_001108180 /// XM_001071908 /// XM_236571	---
1389704_at	NNN	0.297463	---	---	AA850490	---	1389704_at	546.177	485.375	325.167	307.27	146.702	91.3616	37.3106	161.643	140.574	21.653	82.8637	Rn.7010.1	gb:AA850490 /DB_XREF=gi:2938030 /DB_XREF=EST193257 /CLONE=ROVAG33 /FEA=EST /CNT=7 /TID=Rn.7010.1 /TIER=Stack /STK=6 /UG=Rn.7010 /UG_TITLE=ESTs	AA850490	Rn.7010	Rn.7010	chr18:28266679-28267201 (-) // 99.81 // p11	Transcribed locus	---	---	0	---	---
1390240_at	NNN	0.296589	---	---	BM389611	---	1390240_at	529.261	598.322	502.807	420.199	312.54	109.465	116.328	143.618	191.292	15.4367	89.2174	Rn.25146.1	gb:BM389611 /DB_XREF=gi:18189664 /DB_XREF=UI-R-CN1-cjo-c-13-0-UI.s1 /CLONE=UI-R-CN1-cjo-c-13-0-UI /FEA=EST /CNT=6 /TID=Rn.25146.1 /TIER=ConsEnd /STK=5 /UG=Rn.25146 /UG_TITLE=ESTs	BM389611	Rn.25146	Rn.25146	chr17:84062799-84063306 (+) // 99.6 // q12.3	Transcribed locus	---	---	0	---	---
1388465_at	NNN	0.296342	RGD1359600	RGD1359600	AA891733	chr18q12.1	1388465_at	1135.88	1343.65	1062.79	645.942	445.593	297.939	135.719	325.154	339.752	101.784	240.04	Rn.8288.1	gb:AA891733 /DB_XREF=gi:3018612 /DB_XREF=EST195536 /CLONE=RKIAG10 /FEA=EST /CNT=21 /TID=Rn.8288.1 /TIER=Stack /STK=17 /UG=Rn.8288 /UG_TITLE=ESTs	AA891733	Rn.8288	Rn.8288	chr18:64749753-64750663 (+) // 99.34 // q12.1	LEA_4 domain containing protein RGD1359600	RGD1359600	chr18q12.1	307343	NM_001007688	---
1370854_at	NNN	0.296275	Nexn	NEXN	AA799423	chr2q45	1370854_at	2570.91	2597.66	1525.48	1299.37	514.856	539.123	123.996	878.4	475.115	23.4796	20.3827	Rn.12358.2	gb:AA799423 /DB_XREF=gi:2862378 /DB_XREF=EST188920 /CLONE=RHEAA88 /FEA=FLmRNA /CNT=28 /TID=Rn.12358.2 /TIER=ConsEnd /STK=5 /UG=Rn.12358 /UG_TITLE=Rattus norvegicus F-actin binding protein b-Nexilin mRNA, complete cds /FL=gb:AF056035.1	AA799423	Rn.12358	Rn.107975	chr2:250761412-250781629 (-) // 85.0 // q45	nexilin	Nexn	chr2q45	246172	NM_139230 /// NM_139231	---
1371576_at	NNN	0.295445	Mrps36_predicted	MRPS36_PREDICTED	AW142276	chr2q12	1371576_at	2784.82	3985.36	2913.86	2109.64	1299.3	664.401	505.314	908.253	1016.64	786.326	885.689	Rn.3406.1	gb:AW142276 /DB_XREF=gi:6162165 /DB_XREF=EST292512 /CLONE=RGIAR03 /FEA=EST /CNT=32 /TID=Rn.3406.1 /TIER=Stack /STK=19 /UG=Rn.3406 /UG_TITLE=ESTs	AW142276	Rn.3406	Rn.3406	chr9:74142282-74143203 (+) // 67.54 // q33 /// chr3:54138361-54138992 (+) // 66.45 // q21 /// chr2:31530723-31538483 (-) // 98.03 // q12	mitochondrial ribosomal protein S36 (predicted)	Mrps36_predicted	chr2q12	294696	XM_001071159 /// XM_215468	---
1387787_at	NNN	0.294849	Mylpf	MYLPF	NM_012605	chr1q36	1387787_at	32898.4	28717	29333.7	26212.1	16005.2	8297.3	2852.86	11061	9200.07	25.3509	7.80893	Rn.6534.1	gb:NM_012605.1 /DB_XREF=gi:6981237 /GEN=Myl2 /FEA=FLmRNA /CNT=15 /TID=Rn.6534.1 /TIER=FL+Stack /STK=9 /UG=Rn.6534 /LL=24584 /DEF=Rattus norvegicus Myosin, light polypeptide 2, alkali; ventricular, skeletal, slow (Myl2), mRNA. /PROD=myosin, light polypeptide 2, alkali;ventricular, skeletal, slow /FL=gb:NM_012605.1	NM_012605	Rn.6534	Rn.6534	chr1:186471788-186474559 (+) // 98.06 // q36	myosin light chain, phosphorylatable, fast skeletal muscle	Mylpf	chr1q36	24584	NM_012605	Smooth_muscle_contraction // GenMAPP /// Striated_muscle_contraction // GenMAPP
1370761_at	NNN	0.294825	Olr1361	OLR1361	M64377	chr10q12	1370761_at	74.7212	48.2779	55.61	29.3353	5.89587	17.0731	14.2653	5.72674	13.3712	6.31525	9.97557	Rn.44381.1	gb:M64377.1 /DB_XREF=gi:205815 /FEA=FLmRNA /CNT=1 /TID=Rn.44381.1 /TIER=FL /STK=1 /UG=Rn.44381 /DEF=Rat olfactory protein mRNA, complete cds. /PROD=olfactory protein /FL=gb:M64377.1	M64377	Rn.44381	Rn.44381	chr10:12199165-12200107 (+) // 100.0 // q12 /// chr10:12123534-12124476 (+) // 97.77 // q12 /// chr10:12195534-12480157 (+) // 90.66 // q12 /// chr10:12357106-12358047 (-) // 93.95 // q12 /// chr10:12236740-12237682 (-) // 93.74 // q12 /// chr10:12170567-12171510 (-) // 93.31 // q12 /// chr10:12334210-12707702 (-) // 91.61 // q12 /// chr10:12300201-12301143 (-) // 91.3 // q12 /// chr10:12408957-1…	olfactory receptor 1361	Olr1361	chr10q12	287000	NM_173333	GPCRDB_Other // GenMAPP
1373774_at	NNN	0.292941	Rit2	RIT2	AI412619	chr18p12	1373774_at	80.726	29.0206	149.582	130.768	92.8483	8.22565	19.7368	72.5309	12.6862	34.5798	9.57058	Rn.40378.1	gb:AI412619 /DB_XREF=gi:4256123 /DB_XREF=EST240918 /CLONE=RBRDK48 /FEA=EST /CNT=8 /TID=Rn.40378.1 /TIER=Stack /STK=8 /UG=Rn.40378 /UG_TITLE=ESTs	AI412619	Rn.40378	Rn.106719	chr18:23316071-23316481 (-) // 96.02 // p12	Ras-like without CAAX 2	Rit2	chr18p12	291713	NM_001013060	---
1377054_at	NNN	0.29224	---	---	BF418563	---	1377054_at	192.787	198.305	105.986	224.517	88.4129	16.8703	8.57899	13.8443	150.08	22.7395	9.02711	Rn.41884.1	gb:BF418563 /DB_XREF=gi:11406552 /DB_XREF=UI-R-BJ2-bqh-d-05-0-UI.s1 /CLONE=UI-R-BJ2-bqh-d-05-0-UI /FEA=EST /CNT=5 /TID=Rn.41884.1 /TIER=ConsEnd /STK=4 /UG=Rn.41884 /UG_TITLE=ESTs	BF418563	Rn.41884	Rn.41884	chr17:19389537-19390026 (+) // 99.8 // p14	Transcribed locus	---	---	0	---	---
1388194_at	NNN	0.291981	Dlat	DLAT	BI295900	chr8q23	1388194_at	851.293	1053.13	1036.5	572.053	259.24	159.531	166.271	281.754	273.578	216.585	171.595	Rn.15413.1	gb:BI295900 /DB_XREF=gi:14959809 /DB_XREF=UI-R-DK0-cfc-a-10-0-UI.s1 /CLONE=UI-R-DK0-cfc-a-10-0-UI /FEA=mRNA /CNT=25 /TID=Rn.15413.1 /TIER=ConsEnd /STK=0 /UG=Rn.15413 /LL=81654 /UG_GENE=Dlat /UG_TITLE=dihydrolipoamide acetyltransferase	BI295900	Rn.15413	Rn.15413	chr17:3379351-3382798 (+) // 97.33 // p14 /// chr8:53988374-54014081 (-) // 98.46 // q23	dihydrolipoamide S-acetyltransferase (E2 component of pyruvate dehydrogenase complex)	Dlat	chr8q23	81654	NM_031025 /// XM_001070811	Glycolysis_and_Gluconeogenesis // GenMAPP /// Krebs-TCA_Cycle // GenMAPP
1367978_at	NNN	0.291926	Adcy2	ADCY2	NM_031007	chr17p14	1367978_at	546.286	845.216	740.365	575.777	309.899	213.821	80.6686	188.561	221.667	142.862	275.759	Rn.10731.1	gb:NM_031007.1 /DB_XREF=gi:13591905 /GEN=Adcy2 /FEA=FLmRNA /CNT=16 /TID=Rn.10731.1 /TIER=FL+Stack /STK=11 /UG=Rn.10731 /LL=81636 /DEF=Rattus norvegicus adenylyl cyclase 2 (Adcy2), mRNA. /PROD=adenylyl cyclase 2 /FL=gb:M80550.1 gb:NM_031007.1	NM_031007	Rn.10731	Rn.10731	chr17:4543499-5040449 (+) // 94.4 // p14	adenylate cyclase 2	Adcy2	chr17p14	81636	NM_031007	Calcium_regulation_in_cardiac_cells // GenMAPP /// G_Protein_Signaling // GenMAPP /// Smooth_muscle_contraction // GenMAPP
1387846_at	NNN	0.291649	Cacna1f	CACNA1F	NM_053701	chrXq13	1387846_at	21.9402	69.8568	29.1302	44.3321	10.5276	6.87998	9.41356	15.5197	9.20118	12.2033	12.7008	Rn.39125.1	gb:NM_053701.1 /DB_XREF=gi:16758517 /GEN=Cacna1f /FEA=FLmRNA /CNT=5 /TID=Rn.39125.1 /TIER=FL /STK=0 /UG=Rn.39125 /LL=114493 /DEF=Rattus norvegicus calcium channel, voltage-dependent, alpha 1F subunit (Cacna1f), mRNA. /PROD=calcium channel, voltage-dependent, alpha 1Fsubunit /FL=gb:NM_053701.1 gb:AF365975.1	NM_053701	Rn.39125	Rn.39125	chrX:26908775-26937165 (-) // 97.02 // q13	calcium channel, voltage-dependent, alpha 1F subunit	Cacna1f	chrXq13	114493	NM_053701	---
1369928_at	NNN	0.290025	Acta1	ACTA1	NM_019212	chr19q12	1369928_at	30060.4	32029.9	39675	30489.8	15285.5	11808.2	2970.07	12193.9	7260.21	10.3122	13.6059	Rn.39438.1	gb:NM_019212.1 /DB_XREF=gi:9506370 /GEN=Acta1 /FEA=FLmRNA /CNT=54 /TID=Rn.39438.1 /TIER=FL+Stack /STK=46 /UG=Rn.39438 /LL=29437 /DEF=Rattus norvegicus actin, alpha 1, skeletal muscle (Acta1), mRNA. /PROD=actin, alpha 1, skeletal muscle /FL=gb:NM_019212.1	NM_019212	Rn.39438	Rn.82732	chr19:54081497-54083476 (-) // 98.44 // q12	actin, alpha 1, skeletal muscle	Acta1	chr19q12	29437	NM_019212	---
1388483_at	NNN	0.288542	Cfl2_predicted	CFL2_PREDICTED	BI296011	chr6q23	1388483_at	4499.83	4625.61	3791.28	3837.17	2024.34	1112.87	676.425	1175.82	1369.52	831.241	2701.95	Rn.1857.1	gb:BI296011 /DB_XREF=gi:14960028 /DB_XREF=UI-R-DK0-cfd-d-02-0-UI.s1 /CLONE=UI-R-DK0-cfd-d-02-0-UI /FEA=EST /CNT=27 /TID=Rn.1857.1 /TIER=Stack /STK=16 /UG=Rn.1857 /UG_TITLE=ESTs, Moderately similar to COF1 RAT COFILIN, NON-MUSCLE ISOFORM (R.norvegicus)	BI296011	Rn.1857	Rn.101880	chr6:75204815-75206232 (-) // 95.4 // q23	cofilin 2, muscle (predicted)	Cfl2_predicted	chr6q23	366624	NM_001108982 /// XM_001079054 /// XM_345674	---
1370390_at	NNN	0.286569	Coro6	CORO6	AF140359	chr10q26	1370390_at	499.569	709.534	554.653	407.031	171.993	157.246	94.2523	192.486	93.1099	233.582	94.427	Rn.28432.1	gb:AF140359.1 /DB_XREF=gi:15430627 /FEA=FLmRNA /CNT=8 /TID=Rn.28432.1 /TIER=FL+Stack /STK=6 /UG=Rn.28432 /DEF=Rattus norvegicus coronin relative protein mRNA, complete cds. /PROD=coronin relative protein /FL=gb:AF140359.1	AF140359	Rn.28432	Rn.28432	chr10:66646677-66654678 (-) // 95.74 // q26	coronin, actin binding protein 6	Coro6	chr10q26	245982	NM_139115	---
1371414_at	NNN	0.285287	Gsn	GSN	BI285576	chr3p11	1371414_at	9018	14825.8	12819.2	7690.06	4573.42	1885.69	3243.4	2850.82	3186.58	3948.61	1895.7	Rn.2883.1	gb:BI285576 /DB_XREF=gi:14939374 /DB_XREF=UI-R-CW0s-ccb-g-06-0-UI.s1 /CLONE=UI-R-CW0s-ccb-g-06-0-UI /FEA=EST /CNT=27 /TID=Rn.2883.1 /TIER=Stack /STK=27 /UG=Rn.2883 /UG_TITLE=ESTs, Highly similar to GELS MOUSE GELSOLIN (M.musculus)	BI285576	Rn.2883	Rn.103770	chr3:14385913-14386315 (+) // 91.78 // p11	gelsolin	Gsn	chr3p11	296654	NM_001004080	---
1367589_at	NNN	0.283927	Aco2	ACO2	NM_024398	chr7q34	1367589_at	10832.3	9622.66	7564.81	5595.23	3010.09	1964.84	1399.02	2248.58	2706.63	2318.58	1877.47	Rn.43737.1	gb:NM_024398.1 /DB_XREF=gi:13242311 /GEN=Aco2 /FEA=FLmRNA /CNT=70 /TID=Rn.43737.1 /TIER=FL+Stack /STK=49 /UG=Rn.43737 /LL=79250 /DEF=Rattus norvegicus mitochondrial aconitase (nuclear aco2 gene) (Aco2), mRNA. /PROD=mitochondrial aconitase (nuclear aco2 gene) /FL=gb:NM_024398.1	NM_024398	Rn.43737	Rn.43737	chr7:120223784-120266936 (+) // 91.98 // q34	aconitase 2, mitochondrial	Aco2	chr7q34	79250	NM_024398	Krebs-TCA_Cycle // GenMAPP
1374710_at	NNN	0.283074	---	---	BI289549	---	1374710_at	1175.55	1674.06	1374.44	825.394	731.245	427.259	154.476	348.778	378.577	73.5159	75.1263	Rn.41040.1	gb:BI289549 /DB_XREF=gi:14947234 /DB_XREF=UI-R-DK0-cff-d-03-0-UI.s1 /CLONE=UI-R-DK0-cff-d-03-0-UI /FEA=EST /CNT=9 /TID=Rn.41040.1 /TIER=Stack /STK=6 /UG=Rn.41040 /UG_TITLE=ESTs	BI289549	Rn.41040	Rn.41040	chr5:65367555-65368479 (+) // 100.0 // q22	Transcribed locus	---	---	0	---	---
1375055_at	NNN	0.281227	LOC686460 /// LOC690423	LOC686460 /// LOC690423	AI112084	chr7q11	1375055_at	678.971	1170.89	878.543	633.373	423.963	263.719	101.676	278.144	208.184	16.7177	36.5575	Rn.20205.1	gb:AI112084 /DB_XREF=gi:3512033 /DB_XREF=UI-R-Y0-mo-b-02-0-UI.s1 /CLONE=UI-R-Y0-mo-b-02-0-UI /FEA=EST /CNT=6 /TID=Rn.20205.1 /TIER=Stack /STK=6 /UG=Rn.20205 /UG_TITLE=ESTs	AI112084	Rn.20205	Rn.72542	chr7:10416134-10416544 (+) // 78.05 // q11	similar to JP-45 protein	LOC686460 /// LOC690423	chr7q11	0	NM_001109591 /// XM_001059651 /// XM_001059707 /// XM_001071076 /// XM_001071110	---
1370334_at	NNN	0.279532	Plekhb1	PLEKHB1	AF081582	chr1q32	1370334_at	734.461	720.479	523.419	323.064	121.878	106.01	55.9902	236.141	143.77	64.5799	4.20342	Rn.8415.1	gb:AF081582.1 /DB_XREF=gi:6650280 /GEN=Kpl1 /FEA=FLmRNA /CNT=17 /TID=Rn.8415.1 /TIER=FL+Stack /STK=10 /UG=Rn.8415 /LL=64471 /DEF=Rattus norvegicus KPL1 (Kpl1) mRNA, complete cds. /PROD=KPL1 /FL=gb:AF118562.1 gb:AF081582.1	AF081582	Rn.8415	Rn.8415	chr1:158081924-158096197 (-) // 99.95 // q32	pleckstrin homology domain containing, family B (evectins) member 1	Plekhb1	chr1q32	64471	NM_172033	---
1375758_at	NNN	0.279451	---	---	BF404935	---	1375758_at	10.139	63.6618	23.6004	14.3686	3.21193	1.68613	1.84721	6.13201	16.0401	15.2651	2.3118	Rn.63579.1	gb:BF404935 /DB_XREF=gi:11392910 /DB_XREF=UI-R-CA1-bij-e-03-0-UI.s1 /CLONE=UI-R-CA1-bij-e-03-0-UI /FEA=EST /CNT=7 /TID=Rn.63579.1 /TIER=Stack /STK=6 /UG=Rn.63579 /UG_TITLE=ESTs	BF404935	Rn.63579	Rn.210800	chr20:25346237-25346631 (+) // 71.84 // p11	Transcribed locus	---	---	0	---	---
1369467_a_at	NNN	0.27898	Pfkfb1	PFKFB1	NM_012621	chrXq22-q31	1369467_a_at	613.905	547.109	317.199	103.207	100.144	71.0896	67.6648	118.642	117.901	116.412	100.849	Rn.10115.1	gb:NM_012621.1 /DB_XREF=gi:6981349 /GEN=Pfkfb1 /FEA=FLmRNA /CNT=2 /TID=Rn.10115.1 /TIER=FL /STK=2 /UG=Rn.10115 /LL=24638 /DEF=Rattus norvegicus 6-Phosphofructo-2-kinasefructose-2,6-bisphosphatase 1 (liver and muscle) (Pfkfb1), mRNA. /PROD=6-Phosphofructo-2-kinasefructose-2,6-bisphosphatase 1 (liver and muscle) /FL=gb:NM_012621.1 gb:J04197.1	NM_012621	Rn.10115	Rn.10115	chrX:39838443-39886105 (+) // 99.16 // q21	6-phosphofructo-2-kinase/fructose-2,6-biphosphatase 1	Pfkfb1	chrXq22-q31	24638	NM_012621	---
1388451_at	NNN	0.278786	---	---	AA817802	---	1388451_at	904.312	999.475	820.537	323.694	219.89	276.614	125.618	158.317	168.288	7.19193	35.9482	Rn.1110.1	gb:AA817802 /DB_XREF=gi:4198328 /DB_XREF=UI-R-A0-ae-b-09-0-UI.s1 /CLONE=UI-R-A0-ae-b-09-0-UI /FEA=EST /CNT=23 /TID=Rn.1110.1 /TIER=Stack /STK=17 /UG=Rn.1110 /UG_TITLE=ESTs	AA817802	---	---	chr4:15136450-15137438 (-) // 99.49 // q11	---	---	---	0	---	---
1372569_at	NNN	0.275619	---	---	AI171676	---	1372569_at	3005.81	3213.14	3447.86	1965.18	715.56	843.787	474.705	729.528	674.555	1143.19	839.482	Rn.6423.1	gb:AI171676 /DB_XREF=gi:3711716 /DB_XREF=EST217651 /CLONE=RMUBO20 /FEA=EST /CNT=13 /TID=Rn.6423.1 /TIER=Stack /STK=11 /UG=Rn.6423 /UG_TITLE=ESTs	AI171676	---	---	chr5:144033135-144033670 (+) // 99.63 // q36	---	---	---	0	---	---
1369960_at	NNN	0.273448	Fxyd1	FXYD1	NM_031648	chr1q21	1369960_at	3128.69	2977.09	3236.07	2549.74	1581.04	784.163	401.401	918.293	843.393	117.476	76.5801	Rn.3828.1	gb:NM_031648.1 /DB_XREF=gi:13928895 /GEN=Fxyd1 /FEA=FLmRNA /CNT=19 /TID=Rn.3828.1 /TIER=FL+Stack /STK=15 /UG=Rn.3828 /LL=58971 /DEF=Rattus norvegicus FXYD domain-containing ion transport regulator 1 (Fxyd1), mRNA. /PROD=phospholemman precursor /FL=gb:NM_031648.1 gb:U72246.1	NM_031648	Rn.3828	Rn.3828	chr1:86095256-86099404 (-) // 99.3 // q21	FXYD domain-containing ion transport regulator 1	Fxyd1	chr1q21	58971	NM_031648	---
1373320_at	NNN	0.272937	---	---	BG373883	---	1373320_at	84.6879	240.12	358.098	145.432	47.9424	41.3053	8.61181	99.1115	42.3071	39.6758	4.34743	Rn.73020.1	gb:BG373883 /DB_XREF=gi:13298355 /DB_XREF=UI-R-CV1-bsk-h-12-0-UI.s1 /CLONE=UI-R-CV1-bsk-h-12-0-UI /FEA=EST /CNT=9 /TID=Rn.73020.1 /TIER=Stack /STK=9 /UG=Rn.73020 /UG_TITLE=ESTs	BG373883	Rn.73020	Rn.160173	chr8:101795079-101797355 (+) // 95.52 // q31	Transcribed locus	---	---	0	---	---
1375053_at	NNN	0.272505	---	---	BE329035	---	1375053_at	571.701	596.483	348.501	254.221	99.6979	122.82	87.8389	69.9418	127.199	104.613	56.0188	Rn.11842.1	gb:BE329035 /DB_XREF=gi:9202811 /DB_XREF=hq32h10.x1 /CLONE=IMAGE:3121123 /FEA=EST /CNT=6 /TID=Rn.11842.1 /TIER=Stack /STK=6 /UG=Rn.11842 /UG_TITLE=ESTs	BE329035	Rn.11842	Rn.11842	chr8:38134930-38135323 (-) // 95.85 // q21	Transcribed locus, strongly similar to NP_001025009.1 Pbx/knotted 1 homeobox 2 [Mus musculus]	---	---	0	---	---
1374017_at	NNN	0.2724	RGD1562778_predicted	RGD1562778_PREDICTED	BI289517	chr1q36	1374017_at	809.51	1284.39	1226.71	947.819	482.369	281.206	120.058	322.676	311.354	77.2122	27.51	Rn.23565.1	gb:BI289517 /DB_XREF=gi:14947171 /DB_XREF=UI-R-DK0-cff-a-04-0-UI.s1 /CLONE=UI-R-DK0-cff-a-04-0-UI /FEA=EST /CNT=9 /TID=Rn.23565.1 /TIER=Stack /STK=7 /UG=Rn.23565 /UG_TITLE=ESTs	BI289517	Rn.23565	Rn.23565	chr1:187295362-187295961 (+) // 54.27 // q36	similar to tripartite motif protein 50 (predicted)	RGD1562778_predicted	chr1q36	365377	NM_001077675 /// XM_001080388 /// XM_344967	---
1386927_at	NNN	0.27151	Cpt2	CPT2	NM_012930	chr5q35	1386927_at	1316.82	1433.28	1018.89	735.602	537.199	154.422	243.06	343.762	353.874	706.114	219.466	Rn.11389.1	gb:NM_012930.1 /DB_XREF=gi:6978704 /GEN=Cpt2 /FEA=FLmRNA /CNT=23 /TID=Rn.11389.1 /TIER=FL+Stack /STK=17 /UG=Rn.11389 /LL=25413 /DEF=Rattus norvegicus Carnitine palmitoyltransferase 2 (Cpt2), mRNA. /PROD=carnitine palmitoyltransferase 2 /FL=gb:J05470.1 gb:U88295.1 gb:NM_012930.1	NM_012930	Rn.11389	Rn.11389	chr5:129007681-129025501 (-) // 97.25 // q35	carnitine palmitoyltransferase 2	Cpt2	chr5q35	25413	NM_012930	Fatty_Acid_Degradation // GenMAPP /// Mitochondrial_fatty_acid_betaoxidation // GenMAPP
1373883_at	NNN	0.271232	Cdadc1	CDADC1	BE102485	chr15p12	1373883_at	605.906	897.563	896.035	353.838	259.689	197.001	145.206	133.454	178.124	97.6202	56.8994	Rn.19513.1	gb:BE102485 /DB_XREF=gi:8494584 /DB_XREF=UI-R-BT1-aqn-b-12-0-UI.s1 /CLONE=UI-R-BT1-aqn-b-12-0-UI /FEA=EST /CNT=12 /TID=Rn.19513.1 /TIER=Stack /STK=7 /UG=Rn.19513 /UG_TITLE=ESTs	BE102485	Rn.19513	Rn.76647	chr15:38658226-38658814 (-) // 84.13 // p12	cytidine and dCMP deaminase domain containing 1	Cdadc1	chr15p12	361052	NM_001012156	---
1372065_at	NNN	0.271027	Art3	ART3	AI104393	chr14p22	1372065_at	3952.45	4240.11	3009.56	2796.78	1825.35	1049.3	217.517	1194.91	969.311	126.604	94.319	Rn.4077.1	gb:AI104393 /DB_XREF=gi:3708761 /DB_XREF=EST213682 /CLONE=RHECC71 /FEA=EST /CNT=23 /TID=Rn.4077.1 /TIER=Stack /STK=13 /UG=Rn.4077 /UG_TITLE=ESTs, Weakly similar to T-CELL ECTO-ADP-RIBOSYLTRANSFERASE 2 PRECURSOR (R.norvegicus)	AI104393	Rn.4077	Rn.4077	chr14:17198269-17210094 (-) // 97.11 // p22	ADP-ribosyltransferase 3	Art3	chr14p22	305235	NM_001012034	---
1373410_at	NNN	0.270843	RGD1563119_predicted	RGD1563119_PREDICTED	BE104219	chr2q11	1373410_at	2159.31	1108.8	1010.12	449.526	260.047	406.674	129.411	273.453	271.19	45.4564	106.812	Rn.2477.1	gb:BE104219 /DB_XREF=gi:8496319 /DB_XREF=UI-R-BX0-arm-c-01-0-UI.s1 /CLONE=UI-R-BX0-arm-c-01-0-UI /FEA=EST /CNT=18 /TID=Rn.2477.1 /TIER=Stack /STK=8 /UG=Rn.2477 /UG_TITLE=ESTs	BE104219	Rn.2477	Rn.2477	chr2:12329292-12330845 (-) // 96.36 // q11	similar to MADS box transcription enhancer factor 2, polypeptide C (myocyte enhancer factor 2C) (predicted)	RGD1563119_predicted	chr2q11	499497	XM_001056692 /// XM_574821	---
1388611_at	NNN	0.269616	Tcea3	TCEA3	AW252817	chr5q36	1388611_at	2494.1	3131	2573.18	996.923	268.447	370.5	410.914	696.314	563.512	107.203	201.965	Rn.11547.1	gb:AW252817 /DB_XREF=gi:6596408 /DB_XREF=UI-R-BJ0-ael-a-12-0-UI.s1 /CLONE=UI-R-BJ0-ael-a-12-0-UI /FEA=EST /CNT=14 /TID=Rn.11547.1 /TIER=Stack /STK=14 /UG=Rn.11547 /UG_TITLE=ESTs, Weakly similar to A53004 transcription elongation factor S-II - rat (R.norvegicus)	AW252817	Rn.11547	Rn.11547	chr5:155018078-155019309 (+) // 96.47 // q36	transcription elongation factor A (SII), 3	Tcea3	chr5q36	298559	NM_001015008 /// XM_001069071	---
1387023_at	NNN	0.268129	Gstm3	GSTM3	NM_031154	chr2q34	1387023_at	600.721	608.894	305.451	424.361	187.33	90.8586	101.816	171.938	91.5831	84.4849	115.692	Rn.6036.1	gb:NM_031154.1 /DB_XREF=gi:13592151 /GEN=Gstm3 /FEA=FLmRNA /CNT=15 /TID=Rn.6036.1 /TIER=FL+Stack /STK=11 /UG=Rn.6036 /LL=81869 /DEF=Rattus norvegicus glutathione S-transferase, mu type 3 (Yb3) (Gstm3), mRNA. /PROD=glutathione S-transferase, mu type 3 (Yb3) /FL=gb:J02744.1 gb:NM_031154.1	NM_031154	Rn.6036	Rn.6036	chr2:203491364-203496866 (-) // 77.29 // q34	glutathione S-transferase, mu type 3	Gstm3	chr2q34	81869	NM_031154	---
1388300_at	NNN	0.267716	Mgst3_predicted	MGST3_PREDICTED	AA892234	chr13q24	1388300_at	4274.84	5512.66	5636.15	3415.03	1949.54	773.618	1157.51	1373.41	1147.74	1081.59	1104.97	Rn.1916.1	gb:AA892234 /DB_XREF=gi:3019113 /DB_XREF=EST196037 /CLONE=RKIAO03 /FEA=EST /CNT=67 /TID=Rn.1916.1 /TIER=Stack /STK=55 /UG=Rn.1916 /UG_TITLE=ESTs, Moderately similar to microsomal glutathione S-transferase 3 (H.sapiens)	AA892234	Rn.1916	Rn.1916	chr14:21105761-21106362 (+) // 94.36 // p22 /// chr13:83038051-83043995 (-) // 93.08 // q24	microsomal glutathione S-transferase 3 (predicted)	Mgst3_predicted	chr13q24	289197	XM_001076104 /// XM_213943	---
1373953_at	NNN	0.267269	Slc4a1ap_predicted	SLC4A1AP_PREDICTED	BI290779	chr6q13	1373953_at	2410.39	4389.91	3087.5	1962.1	1022.97	672.672	352.551	792.484	934.712	461.028	396.483	Rn.36032.1	gb:BI290779 /DB_XREF=gi:14949677 /DB_XREF=UI-R-DK0-cga-c-09-0-UI.s1 /CLONE=UI-R-DK0-cga-c-09-0-UI /FEA=EST /CNT=10 /TID=Rn.36032.1 /TIER=Stack /STK=7 /UG=Rn.36032 /UG_TITLE=ESTs	BI290779	Rn.36032	Rn.36032	chr6:24966421-24969479 (-) // 94.33 // q13	solute carrier family 4 (anion exchanger), member 1, adaptor protein (predicted)	Slc4a1ap_predicted	chr6q13	298805	NM_001106709 /// XM_001067937 /// XM_233883	---
1368801_at	NNN	0.266359	Cxxc4	CXXC4	NM_053342	chr2q43	1368801_at	49.2424	52.961	40.4683	32.1366	44.5198	14.8962	5.68171	8.75947	17.3987	4.1333	46.1819	Rn.64309.1	gb:NM_053342.1 /DB_XREF=gi:16758061 /GEN=Idax /FEA=FLmRNA /CNT=3 /TID=Rn.64309.1 /TIER=FL /STK=3 /UG=Rn.64309 /LL=83824 /DEF=Rattus norvegicus inhibitor of the Dvl and Axin complex (Idax), mRNA. /PROD=inhibitor of the Dvl and Axin complex /FL=gb:NM_053342.1 gb:AF272158.1	NM_053342	Rn.64309	Rn.209562	chr2:231705559-231722961 (+) // 96.99 // q43	CXXC finger 4	Cxxc4	chr2q43	83824	NM_053342	---
1389015_at	NNN	0.265453	RGD1560916_predicted	RGD1560916_PREDICTED	AI171982	chr18p13	1389015_at	2954.13	3517.64	3196.51	2119.85	1003.21	712.787	556.632	764.269	682.712	816.229	752.108	Rn.758.1	gb:AI171982 /DB_XREF=gi:3712022 /DB_XREF=EST217976 /CLONE=RMUBT44 /FEA=EST /CNT=16 /TID=Rn.758.1 /TIER=Stack /STK=9 /UG=Rn.758 /UG_TITLE=ESTs, Moderately similar to P8 MTCP-1 PROTEIN (M.musculus)	AI171982	Rn.758	Rn.49474	chr18:111949-115965 (-) // 73.92 // p13	similar to FUN14 domain containing 2 (predicted)	RGD1560916_predicted	chr18p13	361288	XM_001059050 /// XM_001059114 /// XM_341573	---
1370288_a_at	NNN	0.264801	Tpm1	TPM1	AF372216	chr8q24	1370288_a_at	17554	19067.9	20827.5	15088.7	6834.83	5377.12	1451.3	5801.84	4184.17	880.177	2429.84	Rn.1033.2	gb:AF372216.1 /DB_XREF=gi:14134103 /FEA=FLmRNA /CNT=28 /TID=Rn.1033.2 /TIER=FL /STK=1 /UG=Rn.1033 /LL=24851 /UG_GENE=Tpm1 /DEF=Rattus norvegicus myogenic cell tropomyosin alpha isoform mRNA, complete cds, alternatively spliced. /PROD=tropomyosin alpha isoform /FL=gb:M60667.1 gb:M60666.1 gb:AF372216.1	AF372216	Rn.1033	Rn.87540	chr8:71331306-71358011 (-) // 88.32 // q24	tropomyosin 1, alpha	Tpm1	chr8q24	24851	NM_001034068 /// NM_001034069 /// NM_001034070 /// NM_001034071 /// NM_001034072 /// NM_001034073 /// NM_001034074 /// NM_001034075 /// NM_019131	Striated_muscle_contraction // GenMAPP /// Striated_muscle_contraction // GenMAPP /// Striated_muscle_contraction // GenMAPP /// Striated_muscle_contraction // GenMAPP /// Striated_muscle_contraction // GenMAPP /// Striated_muscle_contraction // GenMAPP
1370018_at	NNN	0.264206	Hspb2	HSPB2	NM_130431	chr8q23	1370018_at	261.352	353.55	291.376	243.784	118.129	116.533	32.7129	75.3225	43.483	11.9272	83.1029	Rn.22486.1	gb:NM_130431.1 /DB_XREF=gi:18426863 /GEN=Hspb2 /FEA=FLmRNA /CNT=14 /TID=Rn.22486.1 /TIER=FL+Stack /STK=10 /UG=Rn.22486 /DEF=Rattus norvegicus heat shock 27kD protein 2 (Hspb2), mRNA. /PROD=heat shock 27kD protein 2 /FL=gb:NM_130431.1	NM_130431	Rn.22486	Rn.22486	chr8:54105611-54106988 (-) // 97.05 // q23	heat shock 27kDa protein 2	Hspb2	chr8q23	161476	NM_130431	---
1371897_at	NNN	0.264138	RGD1305821	RGD1305821	AI175375	chr3p11	1371897_at	1907.08	1340.63	1456.13	758.133	309.945	296.799	209.54	410.243	303.084	16.8592	88.868	Rn.24087.1	gb:AI175375 /DB_XREF=gi:3726013 /DB_XREF=EST218916 /CLONE=RMUCM72 /FEA=EST /CNT=17 /TID=Rn.24087.1 /TIER=Stack /STK=15 /UG=Rn.24087 /UG_TITLE=ESTs	AI175375	Rn.24087	Rn.24087	chr3:11223201-11223890 (+) // 74.79 // p11	similar to RIKEN cDNA D830019K17	RGD1305821	chr3p11	296635	NM_001012349	---
1373011_at	NNN	0.26376	LOC619558	LOC619558	BE109520	chr2q22	1373011_at	2913.48	2343.54	2287.29	1943.99	1182.9	378.386	540.934	810.71	521.678	408.091	1203.22	Rn.1498.1	gb:BE109520 /DB_XREF=gi:8501625 /DB_XREF=UI-R-BJ1-avp-b-05-0-UI.s1 /CLONE=UI-R-BJ1-avp-b-05-0-UI /FEA=EST /CNT=19 /TID=Rn.1498.1 /TIER=Stack /STK=10 /UG=Rn.1498 /UG_TITLE=ESTs	BE109520	Rn.1498	Rn.162560	chr2:77565086-77566136 (+) // 99.52 // q22	hypothetical protein LOC619558	LOC619558	chr2q22	619558	NM_001034912	---
1367689_a_at	NNN	0.261616	Cd36 /// LOC685953 /// RGD1562323_predicted	CD36 /// LOC685953 /// RGD1562323_PREDICTED	AF072411	chr4q11	1367689_a_at	2997.59	3198.81	2590.71	2086.63	1263.84	582.368	608.598	622.439	726.906	7.83234	47.0208	Rn.3790.1	gb:AF072411.1 /DB_XREF=gi:3273896 /FEA=FLmRNA /CNT=38 /TID=Rn.3790.1 /TIER=FL /STK=1 /UG=Rn.3790 /LL=29184 /UG_GENE=Cd36 /DEF=Rattus norvegicus fatty acid translocaseCD36 mRNA, complete cds. /PROD=fatty acid translocaseCD36 /FL=gb:AF072411.1 gb:NM_031561.1 gb:L19658.1 gb:AF113914.1	AF072411	Rn.3790	Rn.102418	chr4:13471877-13554419 (+) // 99.14 // q11 /// chr4:13487281-13670270 (+) // 96.79 // q11 /// chr4:13481324-13525620 (+) // 86.65 // q11	cd36 antigen /// similar to fatty acid translocase/CD36 (predicted) /// similar to CD36 antigen	Cd36 /// LOC685953 /// RGD1562323_predicted	chr4q11	0	NM_031561 /// XM_001068996 /// XM_001069037 /// XM_575338	---
1367885_at	NNN	0.260612	Pxmp2	PXMP2	NM_031587	chr12q16	1367885_at	703.507	905.289	647.837	751.48	204.312	109.865	152.132	231.884	175.875	104.066	69.116	Rn.10292.1	gb:NM_031587.1 /DB_XREF=gi:13928795 /GEN=Pxmp2 /FEA=FLmRNA /CNT=18 /TID=Rn.10292.1 /TIER=FL+Stack /STK=14 /UG=Rn.10292 /LL=29533 /DEF=Rattus norvegicus peroxisomal membrane protein 2, 22 kDa (Pxmp2), mRNA. /PROD=peroxisomal membrane protein 2, 22 kDa /FL=gb:NM_031587.1	NM_031587	Rn.10292	Rn.10292	chr12:46540325-46550628 (+) // 97.18 // q16	peroxisomal membrane protein 2	Pxmp2	chr12q16	29533	NM_031587	---
1387214_at	NNN	0.26018	Ces1	CES1	NM_031565	chr19p11	1387214_at	665.478	411.924	349.555	366.612	228.923	75.0666	17.4514	186.751	141.701	50.1351	62.236	Rn.82692.1	gb:NM_031565.1 /DB_XREF=gi:13928767 /GEN=Ces1 /FEA=FLmRNA /CNT=5 /TID=Rn.82692.1 /TIER=FL /STK=5 /UG=Rn.82692 /LL=29225 /DEF=Rattus norvegicus carboxylesterase 1 (Ces1), mRNA. /PROD=carboxylesterase 1 /FL=gb:NM_031565.1	NM_031565	Rn.82692	Rn.161717	chr19:14887899-14924363 (+) // 98.97 // p11	carboxylesterase 1	Ces1	chr19p11	29225	NM_031565 /// XM_001064425	Irinotecan_pathway_PharmGKB // GenMAPP
1376259_at	NNN	0.259357	Prkcq	PRKCQ	AI171093	chr17q12.3	1376259_at	1052.59	821.986	1034.29	496.287	275.37	170.839	196.065	192.798	203.955	41.3048	65.221	Rn.8227.1	gb:AI171093 /DB_XREF=gi:3711133 /DB_XREF=EST217041 /CLONE=RMUBG06 /FEA=EST /CNT=7 /TID=Rn.8227.1 /TIER=ConsEnd /STK=5 /UG=Rn.8227 /UG_TITLE=ESTs	AI171093	Rn.8227	Rn.8227	chr17:78485935-78486919 (-) // 100.0 // q12.3	protein kinase C, theta	Prkcq	chr17q12.3	85420	XM_001064068 /// XM_001064127 /// XM_001066028 /// XM_341553	G_Protein_Signaling // GenMAPP
1390130_at	NNN	0.258948	---	---	BM392225	---	1390130_at	617.794	607.006	605.746	308.813	209.455	156.321	53.9343	139.344	136.978	20.2869	90.9369	Rn.20630.1	gb:BM392225 /DB_XREF=gi:18192278 /DB_XREF=UI-R-DO1-ckp-d-17-0-UI.s1 /CLONE=UI-R-DO1-ckp-d-17-0-UI /FEA=EST /CNT=10 /TID=Rn.20630.1 /TIER=ConsEnd /STK=5 /UG=Rn.20630 /UG_TITLE=ESTs	BM392225	Rn.20630	Rn.95265	chr6:73355108-73355975 (+) // 70.36 // q23	Transcribed locus	---	---	0	---	---
1388661_at	NNN	0.258717	MGC94604	MGC94604	AA943734	chr14q21	1388661_at	194.196	450.627	417.873	196.819	128.678	114.083	44.3627	68.4271	60.4464	52.9038	46.2491	Rn.7443.1	gb:AA943734 /DB_XREF=gi:3103650 /DB_XREF=EST199233 /CLONE=RBRAP03 /FEA=EST /CNT=17 /TID=Rn.7443.1 /TIER=Stack /STK=13 /UG=Rn.7443 /UG_TITLE=ESTs, Weakly similar to T13C5.6.p (Caenorhabditis elegans) (C.elegans)	AA943734	Rn.7443	Rn.106244	chr14:84723110-84726877 (-) // 84.66 // q21	mitochondrial protein, 18 kDa	MGC94604	chr14q21	289745	NM_001006960	---
1372658_at	NNN	0.254485	Dmn	DMN	BG373779	chr1q22	1372658_at	761.992	1213.57	888.117	590.646	338.361	103.062	158.52	319.985	190.577	114.662	58.0873	Rn.46362.1	gb:BG373779 /DB_XREF=gi:13270316 /DB_XREF=UI-R-CV1-bsh-g-08-0-UI.s1 /CLONE=UI-R-CV1-bsh-g-08-0-UI /FEA=EST /CNT=12 /TID=Rn.46362.1 /TIER=Stack /STK=11 /UG=Rn.46362 /UG_TITLE=ESTs	BG373779	Rn.46362	Rn.46362	chr1:122474211-122474972 (-) // 97.56 // q22	desmuslin	Dmn	chr1q22	308709	XM_001055657 /// XM_001055724 /// XM_001058219 /// XM_001058280	---
1379451_at	NNN	0.253778	---	---	AI549081	---	1379451_at	50.2156	53.4218	77.7042	11.0593	16.4868	1.92074	4.0582	7.51395	28.916	6.69412	51.6865	Rn.43678.1	gb:AI549081 /DB_XREF=gi:4466569 /DB_XREF=UI-R-C3-tq-c-12-0-UI.s1 /CLONE=UI-R-C3-tq-c-12-0-UI /FEA=EST /CNT=6 /TID=Rn.43678.1 /TIER=ConsEnd /STK=2 /UG=Rn.43678 /UG_TITLE=ESTs	AI549081	Rn.43678	Rn.147181	chr2:21931189-21931876 (+) // 100.0 // q12	Transcribed locus	---	---	0	---	---
1377065_at	NNN	0.253321	---	---	BG380274	---	1377065_at	410.854	607.434	536.944	187.283	87.0914	150.475	27.6282	65.9842	126.696	11.273	21.9222	Rn.41404.1	gb:BG380274 /DB_XREF=gi:13304746 /DB_XREF=UI-R-CS0-btv-b-05-0-UI.s1 /CLONE=UI-R-CS0-btv-b-05-0-UI /FEA=EST /CNT=5 /TID=Rn.41404.1 /TIER=ConsEnd /STK=4 /UG=Rn.41404 /UG_TITLE=ESTs	BG380274	Rn.41404	Rn.41404	chr16:8167818-8168260 (-) // 93.64 // p16	Transcribed locus, strongly similar to XP_573855.1 PREDICTED: similar to chromosome 10 open reading frame 71 [Rattus norvegicus]	---	---	0	---	---
1371577_at	NNN	0.253269	Ndufs1	NDUFS1	AI171362	chr9q31	1371577_at	4441.49	5461.53	3383.84	3076.66	1825.46	880.203	608.839	1067.02	1129.3	707.074	716.045	Rn.1467.1	gb:AI171362 /DB_XREF=gi:3711402 /DB_XREF=EST217318 /CLONE=RMUBJ72 /FEA=EST /CNT=32 /TID=Rn.1467.1 /TIER=Stack /STK=19 /UG=Rn.1467 /UG_TITLE=ESTs, Moderately similar to S17854 NADH dehydrogenase (H.sapiens)	AI171362	Rn.1467	Rn.1467	chr9:61797935-61801601 (-) // 72.88 // q31	NADH dehydrogenase (ubiquinone) Fe-S protein 1	Ndufs1	chr9q31	301458	NM_001005550	---
1373167_at	NNN	0.251396	RGD1566140_predicted	RGD1566140_PREDICTED	BI295165	chr20q11	1373167_at	1086.29	1317.8	1329.4	701.864	370.251	209.841	262.986	243.337	250.322	460.44	312.129	Rn.19243.1	gb:BI295165 /DB_XREF=gi:14958337 /DB_XREF=UI-R-DK0-ceg-e-09-0-UI.s1 /CLONE=UI-R-DK0-ceg-e-09-0-UI /FEA=EST /CNT=11 /TID=Rn.19243.1 /TIER=Stack /STK=9 /UG=Rn.19243 /UG_TITLE=ESTs	BI295165	Rn.19243	Rn.156423	chr20:28950595-28951233 (+) // 79.47 // q11	similar to Leucine rich repeat containing 20 (predicted)	RGD1566140_predicted	chr20q11	499430	NM_001109171 /// XM_001055761 /// XM_574754	---
1375737_at	NNN	0.249867	Vamp5	VAMP5	AI385361	chr4q33	1375737_at	139.113	93.3427	53.5247	98.5255	10.5997	11.9389	6.51358	29.8294	30.6972	7.84105	17.1085	Rn.22616.2	gb:AI385361 /DB_XREF=gi:4198143 /DB_XREF=UI-R-C2-mu-e-08-0-UI.s2 /CLONE=UI-R-C2-mu-e-08-0-UI /FEA=EST /CNT=7 /TID=Rn.22616.2 /TIER=Stack /STK=6 /UG=Rn.22616 /LL=89818 /UG_GENE=Vamp5 /UG_TITLE=vesicle-associated membrane protein 5	AI385361	Rn.22616	Rn.22616	chr4:105673640-105684850 (+) // 98.14 // q33	Vesicle-associated membrane protein 5	Vamp5	chr4q33	89818	NM_053555	---
1368966_at	NNN	0.249538	Mybph	MYBPH	NM_031813	chr13q13	1368966_at	1256.05	520.177	1063.25	831.327	417.598	403.698	21.3115	212.161	179	20.5183	5.64163	Rn.15019.1	gb:NM_031813.1 /DB_XREF=gi:13929155 /GEN=Mybph /FEA=FLmRNA /CNT=7 /TID=Rn.15019.1 /TIER=FL /STK=2 /UG=Rn.15019 /LL=83708 /DEF=Rattus norvegicus norvegicus myosin binding protein H (Mybph), mRNA. /PROD=norvegicus myosin binding protein H /FL=gb:NM_031813.1 gb:AF077338.1	NM_031813	Rn.15019	Rn.23666	chr13:47151094-47158697 (+) // 99.23 // q13	myosin binding protein H	Mybph	chr13q13	83708	NM_031813	G13_Signaling_Pathway // GenMAPP
1371752_at	NNN	0.248641	RGD1563195_predicted	RGD1563195_PREDICTED	AI105088	chr10q24	1371752_at	1802.11	2866.5	2382.01	1793.02	1150.3	380.472	315.656	682.265	609.526	464.177	239.573	Rn.9054.1	gb:AI105088 /DB_XREF=gi:3709261 /DB_XREF=EST214377 /CLONE=RHECN50 /FEA=EST /CNT=17 /TID=Rn.9054.1 /TIER=Stack /STK=17 /UG=Rn.9054 /UG_TITLE=ESTs	AI105088	Rn.9054	Rn.52091	chr10:55731345-55732065 (-) // 91.43 // q24	similar to Ran-interacting protein MOG1 (predicted)	RGD1563195_predicted	chr10q24	287419	NM_001105790 /// XM_001078960 /// XM_213367	---
1374622_at	NNN	0.245702	---	---	BE107309	---	1374622_at	655.555	862.361	729.905	446.623	344.183	50.9696	125.123	226.34	194.844	45.8265	754.139	Rn.9546.1	gb:BE107309 /DB_XREF=gi:8499414 /DB_XREF=UI-R-BS1-ays-c-08-0-UI.s1 /CLONE=UI-R-BS1-ays-c-08-0-UI /FEA=EST /CNT=9 /TID=Rn.9546.1 /TIER=Stack /STK=6 /UG=Rn.9546 /UG_TITLE=ESTs	BE107309	Rn.9546	Rn.9546	chrX:33065145-33065867 (+) // 97.68 // q14	Transcribed locus	---	---	0	---	---
1368810_a_at	NNN	0.243882	Mbp	MBP	BG666632	chr18q	1368810_a_at	1518.03	760.75	853.545	866.728	161.229	285.705	215.9	115.131	194.958	99.1757	110.048	Rn.18.1	gb:BG666632 /DB_XREF=gi:13888554 /DB_XREF=DRABQH01 /CLONE=DRABQH01 /FEA=FLmRNA /CNT=44 /TID=Rn.18.1 /TIER=Stack /STK=27 /UG=Rn.18 /LL=24547 /UG_GENE=Mbp /UG_TITLE=Myelin basic protein /FL=gb:NM_017026.1 gb:M25889.1	BG666632	Rn.18	Rn.63285	chr18:79025625-79057329 (+) // 99.95 // q12.3	myelin basic protein	Mbp	chr18q	24547	NM_001025289 /// NM_001025291 /// NM_001025292 /// NM_001025293 /// NM_001025294 /// NM_017026	MAPK_Cascade // GenMAPP
1368271_a_at	NNN	0.243743	Fabp4	FABP4	NM_053365	chr2q23	1368271_a_at	3375.69	4628.4	2473.68	1980.59	715.937	727.57	609.384	622.952	609.004	3.4889	39.6113	Rn.4258.1	gb:NM_053365.1 /DB_XREF=gi:16758093 /GEN=LOC84378 /FEA=FLmRNA /CNT=38 /TID=Rn.4258.1 /TIER=FL+Stack /STK=6 /UG=Rn.4258 /LL=84378 /DEF=Rattus norvegicus adipocyte lipid-binding protein (LOC84378), mRNA. /PROD=adipocyte lipid-binding protein /FL=gb:AF144756.1 gb:NM_053365.1 gb:U75581.1	NM_053365	Rn.4258	Rn.4258	chr2:93536118-93540779 (+) // 92.99 // q23	fatty acid binding protein 4, adipocyte	Fabp4	chr2q23	79451	NM_053365	---
1369706_at	NNN	0.243649	Cacng1	CACNG1	NM_019255	chr10q32.1	1369706_at	1085.44	874.7	690.991	900.231	333.559	252.375	54.9728	239.502	210.395	12.3076	4.06713	Rn.24079.1	gb:NM_019255.1 /DB_XREF=gi:9506458 /GEN=Cacng /FEA=FLmRNA /CNT=7 /TID=Rn.24079.1 /TIER=FL /STK=1 /UG=Rn.24079 /LL=29658 /DEF=Rattus norvegicus calcium channel, voltage-dependent, gamma subunit 1 (Cacng), mRNA. /PROD=calcium channel, voltage-dependent, gammasubunit 1 /FL=gb:NM_019255.1	NM_019255	Rn.24079	Rn.24079	chr10:97105395-97118400 (-) // 100.0 // q32.1	calcium channel, voltage-dependent, gamma subunit 1	Cacng1	chr10q32.1	29658	NM_019255	---
1388949_at	NNN	0.242535	---	---	BI297693	---	1388949_at	501.342	277.515	204.297	325.912	122.886	31.8758	105.074	44.1269	96.7615	6.52501	5.53016	Rn.34678.1	gb:BI297693 /DB_XREF=gi:14973973 /DB_XREF=UI-R-CV2-cgz-d-04-0-UI.s1 /CLONE=UI-R-CV2-cgz-d-04-0-UI /FEA=EST /CNT=11 /TID=Rn.34678.1 /TIER=Stack /STK=10 /UG=Rn.34678 /UG_TITLE=ESTs	BI297693	Rn.34678	Rn.57310	chr8:51708789-51709252 (+) // 50.73 // q23	Transcribed locus	---	---	0	---	---
1372289_at	NNN	0.242521	RGD1561141_predicted	RGD1561141_PREDICTED	AI170792	chr3q21	1372289_at	1630.47	2066.17	2022.08	1255.97	781.398	463.04	241.047	407.795	392.931	304.674	883.327	Rn.19224.1	gb:AI170792 /DB_XREF=gi:3710832 /DB_XREF=EST216731 /CLONE=RMUBB57 /FEA=EST /CNT=16 /TID=Rn.19224.1 /TIER=Stack /STK=12 /UG=Rn.19224 /UG_TITLE=ESTs, Weakly similar to solute carrier family 25 (carnitineacylcarnitine translocase), member 20 (Rattus norvegicus) (R.norvegicus)	AI170792	Rn.19224	Rn.19224	chr3:53557240-53559288 (-) // 99.06 // q21	similar to solute carrier family 25 (mitochondrial carrier, Aralar), member 12 (predicted)	RGD1561141_predicted	chr3q21	311122	XM_230015 /// XR_007837	---
1389673_at	NNN	0.237662	---	---	AI549393	---	1389673_at	524.047	713.222	564.135	359.867	141.462	100.321	56.2956	160.917	120.285	122.143	43.4084	Rn.30623.1	gb:AI549393 /DB_XREF=gi:4466881 /DB_XREF=UI-R-C3-ua-c-05-0-UI.s1 /CLONE=UI-R-C3-ua-c-05-0-UI /FEA=EST /CNT=7 /TID=Rn.30623.1 /TIER=Stack /STK=6 /UG=Rn.30623 /UG_TITLE=ESTs	AI549393	Rn.30623	Rn.30623	chr1:101396589-101397302 (+) // 99.86 // q22	Transcribed locus	---	---	0	---	---
1372332_at	NNN	0.237382	---	---	AI170687	---	1372332_at	2224.18	2560.58	2007.18	1278.45	866.089	503.175	230.798	452.3	510.815	86.6735	118.899	Rn.13655.1	gb:AI170687 /DB_XREF=gi:3710727 /DB_XREF=EST216623 /CLONE=RMUAZ96 /FEA=EST /CNT=14 /TID=Rn.13655.1 /TIER=Stack /STK=12 /UG=Rn.13655 /UG_TITLE=ESTs	AI170687	Rn.13655	Rn.13655	chr2:12326603-12327026 (-) // 94.63 // q11	Transcribed locus	---	---	0	---	---
1376977_at	NNN	0.235778	Ptger3	PTGER3	AI411541	chr2q44-q45	1376977_at	96.5974	131.838	157.109	110.139	24.3697	35.2389	12.5497	5.41834	44.8867	7.27383	7.39332	Rn.44081.1	gb:AI411541 /DB_XREF=gi:4255045 /DB_XREF=EST239835 /CLONE=RKIEK23 /FEA=EST /CNT=5 /TID=Rn.44081.1 /TIER=ConsEnd /STK=4 /UG=Rn.44081 /UG_TITLE=ESTs	AI411541	Rn.44081	Rn.10361	chr2:255759322-255759916 (+) // 100.0 // q45	Prostaglandin E receptor 3 (subtype EP3)	Ptger3	chr2q44-q45	24929	NM_012704	GPCRDB_Class_A_Rhodopsin-like // GenMAPP /// GPCRDB_Class_A_Rhodopsin-like // GenMAPP /// Prostaglandin_synthesis_regulation // GenMAPP /// Prostaglandin_synthesis_regulation // GenMAPP /// Small_ligand_GPCRs // GenMAPP /// Small_ligand_GPCRs // GenMAPP
1376927_at	NNN	0.235551	RGD1564978_predicted	RGD1564978_PREDICTED	BI294849	chr1p11	1376927_at	384.623	508.584	446.887	169.994	96.2255	56.8613	43.6561	117.043	85.1349	61.4308	8.80249	Rn.23332.1	gb:BI294849 /DB_XREF=gi:14957704 /DB_XREF=UI-R-DK0-cec-h-04-0-UI.s1 /CLONE=UI-R-DK0-cec-h-04-0-UI /FEA=EST /CNT=5 /TID=Rn.23332.1 /TIER=ConsEnd /STK=4 /UG=Rn.23332 /UG_TITLE=ESTs, Weakly similar to MAPE_HUMAN MELANOMA ANTIGEN PREFERENTIALLY EXPRESSED IN TUMORS (H.sapiens)	BI294849	Rn.23332	Rn.140570	chr1:29728055-29728783 (+) // 76.83 // p11	similar to LOC432779 protein (predicted)	RGD1564978_predicted	chr1p11	502225	NM_001109333 /// XM_001059957 /// XM_577686	---
1372037_at	NNN	0.235392	---	---	AI104117	---	1372037_at	573.195	441.59	525.866	295.315	76.1368	206.402	33.3013	35.2147	85.1574	26.2219	85.1304	Rn.7274.2	gb:AI104117 /DB_XREF=gi:4134229 /DB_XREF=EST213406 /CLONE=RHEBX49 /FEA=EST /CNT=15 /TID=Rn.7274.2 /TIER=Stack /STK=14 /UG=Rn.7274 /UG_TITLE=Rattus norvegicus LIM-domain protein LMP-1 mRNA, complete cds	AI104117	---	---	chr17:15174863-15175580 (+) // 94.68 // p14	---	---	---	0	---	---
1372615_at	NNN	0.235358	Aoc3	AOC3	AI070137	chr10q32.1	1372615_at	1299.88	1567.08	1557.04	872.085	290.373	290.135	194.285	205.15	362.283	61.9068	13.7053	Rn.19962.1	gb:AI070137 /DB_XREF=gi:3396388 /DB_XREF=UI-R-Y0-lu-f-09-0-UI.s1 /CLONE=UI-R-Y0-lu-f-09-0-UI /FEA=EST /CNT=12 /TID=Rn.19962.1 /TIER=Stack /STK=11 /UG=Rn.19962 /UG_TITLE=ESTs	AI070137	Rn.19962	Rn.198327	chr10:90364469-90365040 (+) // 42.56 // q32.1	amine oxidase, copper containing 3	Aoc3	chr10q32.1	29473	NM_031582	---
1373436_at	NNN	0.23529	RGD1306739_predicted	RGD1306739_PREDICTED	AI171288	chr20p11	1373436_at	289.893	466.142	344.007	198.605	190.238	40.9865	89.4146	11.4789	138.375	25.1774	9.76616	Rn.22463.1	gb:AI171288 /DB_XREF=gi:3711328 /DB_XREF=EST217243 /CLONE=RMUBI58 /FEA=EST /CNT=12 /TID=Rn.22463.1 /TIER=Stack /STK=8 /UG=Rn.22463 /UG_TITLE=ESTs	AI171288	Rn.22463	Rn.137452	chr20:20976461-20981877 (+) // 100.0 // p11	similar to RIKEN cDNA 1700040L02 (predicted)	RGD1306739_predicted	chr20p11	361834	XM_001080360 /// XM_342127	---
1376590_at	NNN	0.234408	---	---	AA818732	---	1376590_at	200.019	383.634	330.75	77.7338	138.153	93.4988	8.82626	56.84	52.7939	6.05675	179.703	Rn.17606.1	gb:AA818732 /DB_XREF=gi:4227412 /DB_XREF=UI-R-A0-ay-g-07-0-UI.s1 /CLONE=UI-R-A0-ay-g-07-0-UI /FEA=EST /CNT=13 /TID=Rn.17606.1 /TIER=ConsEnd /STK=4 /UG=Rn.17606 /UG_TITLE=ESTs	AA818732	Rn.17606	Rn.163592	chr4:50647714-50648788 (-) // 98.34 // q22	Transcribed locus	---	---	0	---	---
1372110_at	NNN	0.23418	---	---	BE113148	---	1372110_at	522.657	547.852	435.921	303.06	137.457	66.2707	62.0373	104.504	131.936	64.2573	13.1181	Rn.9179.1	gb:BE113148 /DB_XREF=gi:8505253 /DB_XREF=UI-R-BJ1-awc-b-01-0-UI.s1 /CLONE=UI-R-BJ1-awc-b-01-0-UI /FEA=EST /CNT=17 /TID=Rn.9179.1 /TIER=Stack /STK=13 /UG=Rn.9179 /UG_TITLE=ESTs	BE113148	Rn.9179	Rn.163253	chr14:43722255-43723223 (-) // 100.0 // p11	Transcribed locus	---	---	0	---	---
1389386_at	NNN	0.231085	---	---	AI170759	---	1389386_at	1079.13	592.157	515.19	469.389	222.552	80.0167	152.549	128.704	170.858	117.904	337.507	Rn.2102.1	gb:AI170759 /DB_XREF=gi:4134540 /DB_XREF=EST216698 /CLONE=RMUBB15 /FEA=EST /CNT=9 /TID=Rn.2102.1 /TIER=Stack /STK=7 /UG=Rn.2102 /UG_TITLE=ESTs	AI170759	---	---	chr8:127531516-127535739 (+) // 78.36 // q32	---	---	---	0	---	---
1387010_s_at	NNN	0.230096	Scn1b	SCN1B	NM_017288	chr1q21	1387010_s_at	2075.24	1165.96	2233.29	1019.22	473.216	402.323	125.885	411.877	342.368	68.5929	144.853	Rn.4958.1	gb:NM_017288.1 /DB_XREF=gi:8394244 /GEN=Scn1b /FEA=FLmRNA /CNT=14 /TID=Rn.4958.1 /TIER=FL+Stack /STK=12 /UG=Rn.4958 /LL=29686 /DEF=Rattus norvegicus sodium channel, voltage-gated, type I, beta polypeptide (Scn1b), mRNA. /PROD=sodium channel, voltage-gated, type I, betapolypeptide /FL=gb:NM_017288.1 gb:M91808.1	NM_017288	Rn.4958	Rn.4958	chr1:86162254-86172128 (-) // 94.04 // q21	sodium channel, voltage-gated, type I, beta	Scn1b	chr1q21	29686	NM_017288	---
1368816_at	NNN	0.229638	Mpz	MPZ	BG669096	chr13q24-q25	1368816_at	2307.52	1777.39	1061.52	975.065	177.855	340.958	282.726	306.869	226.7	10.9915	26.9755	Rn.8997.1	gb:BG669096 /DB_XREF=gi:13891018 /DB_XREF=DRN05E04 /CLONE=DRN05E04 /FEA=FLmRNA /CNT=36 /TID=Rn.8997.1 /TIER=Stack /STK=14 /UG=Rn.8997 /LL=24564 /UG_GENE=Mpz /UG_TITLE=Myelin protein zero (Charcot-Marie-Tooth neuropathy 1B) /FL=gb:NM_017027.1 gb:K03242.1	BG669096	Rn.8997	Rn.8997	chr13:87040452-87046199 (+) // 99.2 // q24	myelin protein zero	Mpz	chr13q24-q25	24564	NM_017027	---
1367896_at	NNN	0.229577	Ca3	CA3	AB030829	chr2q23	1367896_at	1516.04	3378.76	2727.04	1251.73	935.244	475.511	35.9307	483.227	806.83	67.6721	22.8038	Rn.1647.1	gb:AB030829.1 /DB_XREF=gi:9757515 /GEN=CA3 /FEA=FLmRNA /CNT=32 /TID=Rn.1647.1 /TIER=FL+Stack /STK=13 /UG=Rn.1647 /LL=54232 /DEF=Rattus norvegicus CA3 mRNA for carbonic anhydrase III, complete cds. /PROD=carbonic anhydrase III /FL=gb:AB030830.1 gb:AF037072.1 gb:AB030829.1 gb:NM_019292.1 gb:M22413.1	AB030829	Rn.1647	Rn.1647	chr2:88105881-88114714 (-) // 89.11 // q23	carbonic anhydrase 3	Ca3	chr2q23	54232	NM_019292	---
1389438_at	NNN	0.228585	RGD1561916_predicted	RGD1561916_PREDICTED	BE118454	chr5q22	1389438_at	93.6927	139.771	103.788	43.4378	8.49336	8.47666	27.3474	15.8937	19.4514	11.5246	12.1747	Rn.6325.1	gb:BE118454 /DB_XREF=gi:8510559 /DB_XREF=UI-R-BJ1-azp-g-09-0-UI.s1 /CLONE=UI-R-BJ1-azp-g-09-0-UI /FEA=EST /CNT=8 /TID=Rn.6325.1 /TIER=Stack /STK=7 /UG=Rn.6325 /UG_TITLE=ESTs	BE118454	Rn.6325	Rn.6325	chr5:58925019-58927363 (-) // 100.0 // q22	similar to testes development-related NYD-SP22 isoform 1 (predicted)	RGD1561916_predicted	chr5q22	500441	XM_001068622 /// XM_575803	---
1372858_at	NNN	0.227286	---	---	AA900367	---	1372858_at	736.125	1103.24	595.559	492.119	415.582	195.035	103.341	152.331	157.077	75.8296	119.617	Rn.8441.1	gb:AA900367 /DB_XREF=gi:4232859 /DB_XREF=UI-R-E0-cm-e-08-0-UI.s2 /CLONE=UI-R-E0-cm-e-08-0-UI /FEA=EST /CNT=12 /TID=Rn.8441.1 /TIER=Stack /STK=10 /UG=Rn.8441 /UG_TITLE=ESTs	AA900367	---	---	chr20:19131500-19146521 (-) // 99.77 // p11	---	---	---	0	---	---
1374039_at	NNN	0.22644	Car14	CAR14	BI289989	---	1374039_at	326.916	367.751	246.112	209.268	91.403	63.5152	63.7158	77.1883	20.4716	21.0588	98.6205	Rn.22160.1	gb:BI289989 /DB_XREF=gi:14948131 /DB_XREF=UI-R-DK0-cfq-e-09-0-UI.s1 /CLONE=UI-R-DK0-cfq-e-09-0-UI /FEA=EST /CNT=9 /TID=Rn.22160.1 /TIER=Stack /STK=7 /UG=Rn.22160 /UG_TITLE=ESTs, Moderately similar to CAHE MOUSE CARBONIC ANHYDRASE XIV PRECURSOR (M.musculus)	BI289989	Rn.22160	Rn.201792	chr2:190687767-190690462 (-) // 98.85 // q34	carbonic anhydrase 14	Car14	---	791259	NM_001109655	---
1371363_at	NNN	0.224215	Gpd1	GPD1	BI277042	chr7q36	1371363_at	700.194	590.614	682.38	254.726	125.953	88.9063	24.589	155.539	153.183	95.4492	37.2328	Rn.1354.1	gb:BI277042 /DB_XREF=gi:14922537 /DB_XREF=UI-R-CY0-bxp-g-07-0-UI.s1 /CLONE=UI-R-CY0-bxp-g-07-0-UI /FEA=EST /CNT=36 /TID=Rn.1354.1 /TIER=Stack /STK=33 /UG=Rn.1354 /UG_TITLE=ESTs	BI277042	Rn.1354	Rn.44452	chr7:138465415-138466266 (+) // 97.37 // q36	glycerol-3-phosphate dehydrogenase 1 (soluble)	Gpd1	chr7q36	60666	NM_022215	---
1388497_at	NNN	0.223663	Them2_predicted	THEM2_PREDICTED	AI411426	chr17p11	1388497_at	2028.29	2691.37	1758.13	1420.72	795.352	305.57	418.913	449.212	381.899	455.89	323.302	Rn.1730.1	gb:AI411426 /DB_XREF=gi:4254930 /DB_XREF=EST239720 /CLONE=RKIES47 /FEA=EST /CNT=21 /TID=Rn.1730.1 /TIER=Stack /STK=16 /UG=Rn.1730 /UG_TITLE=ESTs, Weakly similar to S44652 f42h10.6 protein - Caenorhabditis elegans (C.elegans)	AI411426	Rn.1730	Rn.1730	chr17:47301964-47314432 (+) // 97.1 // p11	thioesterase superfamily member 2 (predicted)	Them2_predicted	chr17p11	291135	NM_001106111 /// XM_001070460 /// XM_214475	---
1389737_at	NNN	0.222908	Dtna_predicted	DTNA_PREDICTED	BI295980	chr18p12	1389737_at	909.06	1101.16	698.742	1033.62	463.136	120.808	83.8757	242.493	302.814	12.6939	30.9988	Rn.27152.1	gb:BI295980 /DB_XREF=gi:14959967 /DB_XREF=UI-R-DK0-cfd-a-06-0-UI.s1 /CLONE=UI-R-DK0-cfd-a-06-0-UI /FEA=EST /CNT=6 /TID=Rn.27152.1 /TIER=Stack /STK=6 /UG=Rn.27152 /UG_TITLE=ESTs, Highly similar to dystrobrevin (M.musculus)	BI295980	Rn.27152	---	chr18:15514541-15523880 (+) // 99.69 // p12	dystrobrevin alpha (predicted)	Dtna_predicted	chr18p12	307548	XM_001054053 /// XM_001054112 /// XM_001054243 /// XM_001054380 /// XM_001054433 /// XM_001054487 /// XM_001054548 /// XM_001054600 /// XM_001054655 /// XM_001054726 /// XM_001054793	---
1390301_at	NNN	0.22278	---	---	AW524414	---	1390301_at	241.782	387.61	326.55	98.4258	109.227	32.5412	33.3155	85.7864	55.7371	61.2282	155.66	Rn.15569.1	gb:AW524414 /DB_XREF=gi:7166799 /DB_XREF=UI-R-BO0-ahx-b-02-0-UI.s1 /CLONE=UI-R-BO0-ahx-b-02-0-UI /FEA=EST /CNT=5 /TID=Rn.15569.1 /TIER=ConsEnd /STK=5 /UG=Rn.15569 /UG_TITLE=ESTs	AW524414	Rn.15569	Rn.15569	chr3:57130145-57130688 (-) // 98.01 // q23	Transcribed locus	---	---	0	---	---
1388403_at	NNN	0.222334	LOC361596	LOC361596	AI172491	chr1q31	1388403_at	10054.2	14275.8	10733.5	5379.02	2107.28	1552.62	1263.42	2303.25	2448.93	3219.65	1513.73	Rn.3490.1	gb:AI172491 /DB_XREF=gi:3712531 /DB_XREF=EST218504 /CLONE=RMUCA50 /FEA=EST /CNT=21 /TID=Rn.3490.1 /TIER=Stack /STK=20 /UG=Rn.3490 /UG_TITLE=ESTs, Weakly similar to ISOCITRATE DEHYDROGENASE (R.norvegicus)	AI172491	Rn.3490	Rn.3490	chr1:135876051-135876895 (-) // 94.95 // q31	similar to NADP+-specific isocitrate dehydrogenase	LOC361596	chr1q31	361596	NM_001014161	Krebs-TCA_Cycle // GenMAPP
1370951_at	NNN	0.22141	Ppap2b	PPAP2B	Y07783	chr5q34	1370951_at	466.426	400.589	145.193	272.364	81.7544	26.4778	61.3738	111.472	42.6908	18.0876	158.566	Rn.34354.1	gb:Y07783.1 /DB_XREF=gi:1684744 /GEN=Dri 42 /FEA=mRNA /CNT=22 /TID=Rn.34354.1 /TIER=ConsEnd /STK=0 /UG=Rn.34354 /DEF=R.norvegicus mRNA for ER transmembrane protein. /PROD=ER transmembrane protein	Y07783	Rn.34354	Rn.12038	chr5:126121422-126196231 (+) // 98.32 // q34	phosphatidic acid phosphatase type 2B	Ppap2b	chr5q34	192270	NM_138905	---
1375476_at	NNN	0.221014	Pygm	PYGM	AI717476	chr1q43	1375476_at	3045.26	408.205	1527.14	686.118	527.894	217.934	114.929	427.043	335.375	97.2578	82.8051	Rn.35568.1	gb:AI717476 /DB_XREF=gi:5034732 /DB_XREF=UI-R-Y0-acb-f-03-0-UI.s1 /CLONE=UI-R-Y0-acb-f-03-0-UI /FEA=EST /CNT=9 /TID=Rn.35568.1 /TIER=Stack /STK=8 /UG=Rn.35568 /UG_TITLE=ESTs, Highly similar to GLYCOGEN PHOSPHORYLASE, MUSCLE FORM (R.norvegicus)	AI717476	Rn.35568	Rn.11238	chr1:209170483-209172070 (+) // 99.61 // q43	muscle glycogen phosphorylase	Pygm	chr1q43	24701	NM_012638 /// XM_001076049 /// XM_342002	Glycogen_Metabolism // GenMAPP
1388570_at	NNN	0.220812	LOC498909	LOC498909	AI232494	chr19p12	1388570_at	5184.65	5350.39	3650.87	1942.09	1189.25	645.024	644.587	992.211	777.255	1155.07	1179.19	Rn.22044.1	gb:AI232494 /DB_XREF=gi:3816374 /DB_XREF=EST229182 /CLONE=RKICC39 /FEA=EST /CNT=19 /TID=Rn.22044.1 /TIER=Stack /STK=14 /UG=Rn.22044 /UG_TITLE=ESTs	AI232494	Rn.22044	Rn.22044	chr19:10606082-10606752 (-) // 79.85 // p12	similar to RIKEN cDNA 2310005O14	LOC498909	chr19p12	498909	NM_001035257	---
1398458_at	NNN	0.219854	RGD1307284_predicted	RGD1307284_PREDICTED	BE104506	chr17p14	1398458_at	649.719	537.3	515.66	187.788	109.656	19.0785	53.923	176.757	102.03	45.2238	11.7767	Rn.16117.1	gb:BE104506 /DB_XREF=gi:8496606 /DB_XREF=UI-R-BX0-arq-b-11-0-UI.s1 /CLONE=UI-R-BX0-arq-b-11-0-UI /FEA=EST /CNT=5 /TID=Rn.16117.1 /TIER=ConsEnd /STK=4 /UG=Rn.16117 /UG_TITLE=ESTs, Moderately similar to T50615 hypothetical protein DKFZp761G1515.1 (H.sapiens)	BE104506	Rn.16117	Rn.204068	chr17:21597447-21600361 (+) // 99.05 // p14	similar to protein kinase, lysine deficient 1; kinase deficient protein (predicted)	RGD1307284_predicted	chr17p14	306811	XM_225204 /// XR_007501	---
1387814_at	NNN	0.218537	Cav3	CAV3	NM_019155	chr4q42	1387814_at	1640.12	1666.38	1289.21	731.476	517.239	304.988	10.7702	368.631	337.387	18.9533	8.41617	Rn.55046.1	gb:NM_019155.1 /DB_XREF=gi:9506464 /GEN=Cav3 /FEA=FLmRNA /CNT=11 /TID=Rn.55046.1 /TIER=FL+Stack /STK=6 /UG=Rn.55046 /LL=29161 /DEF=Rattus norvegicus caveolin 3 (Cav3), mRNA. /PROD=caveolin 3 /FL=gb:NM_019155.1 gb:U31968.1	NM_019155	Rn.55046	Rn.98191	chr4:148294429-148310016 (+) // 98.31 // q42	caveolin 3	Cav3	chr4q42	29161	NM_019155	Integrin-mediated_cell_adhesion_KEGG // GenMAPP
1372979_at	NNN	0.218034	---	---	BI295828	---	1372979_at	1376.83	1750	1097.03	1053.67	588.655	299.081	127.251	285.57	311.322	37.2791	14.8372	Rn.9334.1	gb:BI295828 /DB_XREF=gi:14959666 /DB_XREF=UI-R-DK0-cfb-b-05-0-UI.s1 /CLONE=UI-R-DK0-cfb-b-05-0-UI /FEA=EST /CNT=10 /TID=Rn.9334.1 /TIER=Stack /STK=10 /UG=Rn.9334 /UG_TITLE=ESTs	BI295828	Rn.9334	Rn.9334	chr15:3866283-3866864 (+) // 96.83 // p16	Transcribed locus	---	---	0	---	---
1387321_at	NNN	0.216867	Atp1b4	ATP1B4	NM_053381	chrXq11	1387321_at	206.746	135.665	147.399	45.0099	21.0215	3.87494	7.36271	49.2129	35.9848	2.33089	5.64818	Rn.48718.1	gb:NM_053381.1 /DB_XREF=gi:16758111 /GEN=Atp1b4 /FEA=FLmRNA /CNT=3 /TID=Rn.48718.1 /TIER=FL /STK=3 /UG=Rn.48718 /LL=84396 /DEF=Rattus norvegicus ATPase, (Na+)K+ transporting, beta 4 polypeptide (Atp1b4), mRNA. /PROD=ATPase, (Na+)K+ transporting, beta 4polypeptide /FL=gb:AF158386.2 gb:NM_053381.1 gb:AF158385.2	NM_053381	Rn.48718	Rn.160581	chrX:7025530-7046207 (-) // 97.63 // q11	ATPase, (Na+)/K+ transporting, beta 4 polypeptide	Atp1b4	chrXq11	84396	NM_053381	---
1389429_at	NNN	0.216215	---	---	AA925367	---	1389429_at	484.623	446.55	420.095	221.128	91.4693	102.467	64.3031	18.3978	102.634	89.2873	18.6979	Rn.15508.1	gb:AA925367 /DB_XREF=gi:4236558 /DB_XREF=UI-R-A1-ee-d-01-0-UI.s1 /CLONE=UI-R-A1-ee-d-01-0-UI /FEA=EST /CNT=8 /TID=Rn.15508.1 /TIER=Stack /STK=7 /UG=Rn.15508 /UG_TITLE=ESTs	AA925367	---	---	chr2:192573522-192574086 (-) // 99.82 // q34	---	---	---	0	---	---
1370033_at	NNN	0.215595	Myl1	MYL1	NM_020104	chr9q32	1370033_at	34624.4	33630.2	35547.5	31091.9	22569.4	6597.2	2081.96	9826.3	8653.22	19.1609	56.067	Rn.40120.1	gb:NM_020104.1 /DB_XREF=gi:13487932 /GEN=Mlc3 /FEA=FLmRNA /CNT=18 /TID=Rn.40120.1 /TIER=FL+Stack /STK=8 /UG=Rn.40120 /LL=56781 /DEF=Rattus norvegicus fast myosin alkali light chain (Mlc3), mRNA. /PROD=fast myosin alkali light chain /FL=gb:NM_020104.1	NM_020104	Rn.40120	Rn.84920	chr9:65717096-65726873 (-) // 86.18 // q32	myosin, light polypeptide 1	Myl1	chr9q32	56781	NM_001077656 /// NM_020104	---
1372158_at	NNN	0.214784	Lrp16	LRP16	BI295768	chr1q43	1372158_at	905.083	1407.46	1233.14	668.374	307.271	163.639	156.073	254.116	203.056	231.409	11.1255	Rn.2314.1	gb:BI295768 /DB_XREF=gi:14959546 /DB_XREF=UI-R-DK0-cfa-d-07-0-UI.s1 /CLONE=UI-R-DK0-cfa-d-07-0-UI /FEA=EST /CNT=15 /TID=Rn.2314.1 /TIER=Stack /STK=13 /UG=Rn.2314 /UG_TITLE=ESTs, Weakly similar to viral non-structural protein like (Caenorhabditis elegans) (C.elegans)	BI295768	Rn.2314	Rn.98178	chr1:209869695-209871392 (+) // 98.42 // q43	LRP16 protein	Lrp16	chr1q43	246233	NM_139337	---
1398306_at	NNN	0.21404	Ampd1	AMPD1	J02811	chr2q34	1398306_at	1633.19	1726.77	1512.1	878.701	413.416	383.793	110.002	326.48	235.226	83.9208	47.8267	Rn.9794.1	gb:J02811.1 /DB_XREF=gi:202882 /FEA=FLmRNA /CNT=3 /TID=Rn.9794.1 /TIER=FL /STK=3 /UG=Rn.9794 /UG_TITLE=Rattus norvegicus myoadenylate deaminase (AMP deaminase) mRNA, complete cds /DEF=Rattus norvegicus myoadenylate deaminase (AMP deaminase) mRNA, complete cds. /FL=gb:J02811.1	J02811	Rn.9794	Rn.9794	chr2:198308511-198331017 (+) // 98.56 // q34	adenosine monophosphate deaminase 1 (isoform M)	Ampd1	chr2q34	25028	NM_138876	---
1387445_at	NNN	0.213728	Phkg1	PHKG1	NM_031573	chr12q13	1387445_at	169.618	120.15	294.326	51.251	12.6693	7.58423	17.7177	57.5631	27.9337	21.8189	8.42466	Rn.10399.1	gb:NM_031573.1 /DB_XREF=gi:13928775 /GEN=Phkg1 /FEA=FLmRNA /CNT=4 /TID=Rn.10399.1 /TIER=FL /STK=2 /UG=Rn.10399 /LL=29353 /DEF=Rattus norvegicus Phosphorylase kinase, gamma 1 (Phkg1), mRNA. /PROD=Phosphorylase kinase, gamma 1 /FL=gb:NM_031573.1	NM_031573	Rn.10399	Rn.10399	chr12:28029577-28043499 (-) // 99.86 // q13	phosphorylase kinase gamma 1	Phkg1	chr12q13	29353	NM_031573	Glycogen_Metabolism // GenMAPP
1367892_at	NNN	0.212332	Pdk2	PDK2	NM_030872	chr10q31	1367892_at	1950.14	1750.07	1902.8	803.052	367.549	298.075	263.637	356.468	232.423	218.034	96.0689	Rn.11363.1	gb:NM_030872.1 /DB_XREF=gi:13540704 /GEN=Pdk2 /FEA=FLmRNA /CNT=16 /TID=Rn.11363.1 /TIER=FL+Stack /STK=14 /UG=Rn.11363 /LL=81530 /DEF=Rattus norvegicus pyruvate dehydrogenase kinase 2 subunit p45 (PDK2) (Pdk2), mRNA. /PROD=pyruvate dehydrogenase kinase 2 subunit p45(PDK2) /FL=gb:AF237719.1 gb:U10357.1 gb:NM_030872.1	NM_030872	Rn.11363	Rn.88597	chr10:83710444-83724973 (-) // 99.64 // q31	pyruvate dehydrogenase kinase, isoenzyme 2	Pdk2	chr10q31	81530	NM_030872 /// XM_001081306	Krebs-TCA_Cycle // GenMAPP /// Krebs-TCA_Cycle // GenMAPP
1375638_at	NNN	0.210919	Sdpr	SDPR	AI009714	chr9q22	1375638_at	1975.12	1225.92	973.693	1195	295.647	234.659	167.469	268.875	284.946	106.781	6.53106	Rn.2472.1	gb:AI009714 /DB_XREF=gi:3223546 /DB_XREF=EST204165 /CLONE=RLUBN60 /FEA=EST /CNT=26 /TID=Rn.2472.1 /TIER=Stack /STK=6 /UG=Rn.2472 /UG_TITLE=ESTs	AI009714	Rn.2472	Rn.203035	chr9:47372163-47373085 (-) // 91.46 // q22	serum deprivation response protein	Sdpr	chr9q22	316384	NM_001007712	---
1370823_at	NNN	0.210858	Bambi	BAMBI	AF387513	chr17q12.1	1370823_at	448.335	484.254	347.133	370.659	280.674	58.9174	107.662	97.2267	61.9367	46.7576	99.4991	Rn.25267.1	gb:AF387513.1 /DB_XREF=gi:14572042 /FEA=FLmRNA /CNT=11 /TID=Rn.25267.1 /TIER=FL+Stack /STK=8 /UG=Rn.25267 /DEF=Rattus norvegicus kinase-deficient TGFbeta superfamily receptor subunit mRNA, complete cds. /PROD=kinase-deficient TGFbeta superfamily receptorsubunit /FL=gb:AF387513.1	AF387513	Rn.25267	Rn.25267	chr17:62654079-62658891 (-) // 97.79 // q12.1	BMP and activin membrane-bound inhibitor, homolog (Xenopus laevis)	Bambi	chr17q12.1	83837	NM_139082	TGF_Beta_Signaling_Pathway // GenMAPP
1372641_at	NNN	0.209754	Alpk3_predicted	ALPK3_PREDICTED	AW434261	chr1q31	1372641_at	1029.37	1830.66	1380.28	607.2	446.362	311.72	82.5346	336.554	157.521	62.7761	154.677	Rn.23649.1	gb:AW434261 /DB_XREF=gi:6965568 /DB_XREF=UI-R-BJ0p-afw-b-06-0-UI.s1 /CLONE=UI-R-BJ0p-afw-b-06-0-UI /FEA=EST /CNT=12 /TID=Rn.23649.1 /TIER=Stack /STK=11 /UG=Rn.23649 /UG_TITLE=ESTs	AW434261	Rn.23649	Rn.68281	chr1:137304173-137304562 (+) // 95.33 // q31	Alpha-kinase 3 (predicted)	Alpk3_predicted	chr1q31	365298	XM_001066959 /// XM_344916	---
1376015_at	NNN	0.20766	---	---	BI296605	---	1376015_at	670.886	939.574	498.218	435.867	117.416	93.8974	41.5027	218.831	87.9947	11.5917	13.3206	Rn.33893.1	gb:BI296605 /DB_XREF=gi:14961196 /DB_XREF=UI-R-CV2-cgt-b-10-0-UI.s1 /CLONE=UI-R-CV2-cgt-b-10-0-UI /FEA=EST /CNT=7 /TID=Rn.33893.1 /TIER=ConsEnd /STK=5 /UG=Rn.33893 /UG_TITLE=ESTs	BI296605	---	---	chr5:1204058-1204732 (+) // 99.85 // q11	---	---	---	0	---	---
1373805_at	NNN	0.207505	Ctsr	CTSR	BI285778	chr17p14	1373805_at	57.8223	15.3635	25.6738	66.4411	1.78748	2.14993	8.21611	9.09296	8.27832	50.6463	3.55049	Rn.78420.1	gb:BI285778 /DB_XREF=gi:14939770 /DB_XREF=UI-R-CX0s-cct-g-07-0-UI.s1 /CLONE=UI-R-CX0s-cct-g-07-0-UI /FEA=EST /CNT=8 /TID=Rn.78420.1 /TIER=Stack /STK=8 /UG=Rn.78420 /UG_TITLE=ESTs, Moderately similar to JC7183 cathepsin Q (EC 3.4.22.-) precursor (accepted) - rat (R.norvegicus)	BI285778	Rn.78420	Rn.106060	chr17:9240429-9244248 (+) // 97.53 // p14	cathepsin R	Ctsr	chr17p14	290975	NM_175581	---
1386961_at	NNN	0.207396	Pfkm	PFKM	BI291434	chr7q36	1386961_at	2454.83	1010.01	1610.36	807.363	341.673	288.645	98.7152	397.125	248.219	408.727	333.54	Rn.11004.1	gb:BI291434 /DB_XREF=gi:14950970 /DB_XREF=UI-R-CV2-cgq-c-04-0-UI.s1 /CLONE=UI-R-CV2-cgq-c-04-0-UI /FEA=FLmRNA /CNT=25 /TID=Rn.11004.1 /TIER=Stack /STK=7 /UG=Rn.11004 /LL=65152 /UG_GENE=Pfkm /UG_TITLE=phosphofructokinase, muscle /FL=gb:U25651.1 gb:NM_031715.1	BI291434	Rn.11004	Rn.11004	chr7:136826119-136846040 (+) // 98.73 // q36	phosphofructokinase, muscle	Pfkm	chr7q36	65152	NM_031715	Glycolysis_and_Gluconeogenesis // GenMAPP /// Glycolysis_and_Gluconeogenesis // GenMAPP
1372639_at	NNN	0.204378	Trim54	TRIM54	AA800245	chr6q14	1372639_at	1686.38	2150.09	1479.97	1343.81	914.75	369.77	140.528	421.205	307.026	103.575	10.7822	Rn.6303.1	gb:AA800245 /DB_XREF=gi:2863200 /DB_XREF=EST189742 /CLONE=RHEAM89 /FEA=EST /CNT=12 /TID=Rn.6303.1 /TIER=Stack /STK=11 /UG=Rn.6303 /UG_TITLE=ESTs, Weakly similar to T09013 RING finger protein Fxy - mouse (M.musculus)	AA800245	Rn.6303	Rn.6303	chr6:25218011-25218894 (-) // 92.07 // q14	tripartite motif-containing 54	Trim54	chr6q14	362708	NM_001013217	---
1375303_at	NNN	0.200026	RGD1564875_predicted	RGD1564875_PREDICTED	BI294983	chr16p16-p15	1375303_at	987.492	726.321	923.965	326.807	184.819	126.867	66.4326	173.961	136.709	20.5721	19.1978	Rn.17340.1	gb:BI294983 /DB_XREF=gi:14957972 /DB_XREF=UI-R-DK0-cee-d-08-0-UI.s1 /CLONE=UI-R-DK0-cee-d-08-0-UI /FEA=EST /CNT=13 /TID=Rn.17340.1 /TIER=Stack /STK=10 /UG=Rn.17340 /UG_TITLE=ESTs, Weakly similar to four and a half LIM domains 2 (Rattus norvegicus) (R.norvegicus)	BI294983	Rn.17340	Rn.17340	chr16:10186046-10186420 (-) // 96.14 // p16	similar to mKIAA0613 protein (predicted)	RGD1564875_predicted	chr16p16-p15	498587	NM_001110490 /// XM_001059372 /// XM_573863	---
1372195_at	NNN	0.199947	Tnnc2	TNNC2	BG663128	chr3q42	1372195_at	30854.2	32287.9	30531.9	25261	14002.8	4454.92	1646.05	7577.76	7585.68	44.164	9.96628	Rn.43529.1	gb:BG663128 /DB_XREF=gi:13885050 /DB_XREF=DRA08F03 /CLONE=DRA08F03 /FEA=EST /CNT=14 /TID=Rn.43529.1 /TIER=Stack /STK=13 /UG=Rn.43529 /UG_TITLE=ESTs, Weakly similar to CALM_HUMAN CALMODULIN (R.norvegicus)	BG663128	Rn.43529	Rn.43529	chr3:155806993-155808050 (-) // 87.29 // q42	troponin C type 2 (fast)	Tnnc2	chr3q42	296369	NM_001037351	---
1371801_at	NNN	0.199268	Myoz2_predicted	MYOZ2_PREDICTED	AI104354	chr2q42	1371801_at	1501.86	2853.48	2195.33	1432.57	990.351	415.738	93.2035	683.076	238.503	6.30245	4.61923	Rn.12931.1	gb:AI104354 /DB_XREF=gi:3708725 /DB_XREF=EST213643 /CLONE=RHECC23 /FEA=EST /CNT=18 /TID=Rn.12931.1 /TIER=Stack /STK=16 /UG=Rn.12931 /UG_TITLE=ESTs	AI104354	Rn.12931	Rn.12931	chr2:219702471-219702886 (-) // 97.65 // q42	myozenin 2 (predicted)	Myoz2_predicted	chr2q42	295426	NM_001106469 /// XM_001075328 /// XM_215692	---
1367918_at	NNN	0.19887	Fez1	FEZ1	NM_031066	chr8q21	1367918_at	204.557	319.944	304.119	53.4653	28.4927	33.9536	31.2398	63.2706	16.4056	10.9106	4.21682	Rn.5468.1	gb:NM_031066.1 /DB_XREF=gi:13994120 /GEN=Fez1 /FEA=FLmRNA /CNT=18 /TID=Rn.5468.1 /TIER=FL+Stack /STK=13 /UG=Rn.5468 /LL=81730 /DEF=Rattus norvegicus protein kinase C-binding protein Zeta1 (Fez1), mRNA. /PROD=protein kinase C-binding protein Zeta1 /FL=gb:U48249.2 gb:NM_031066.1 gb:U63740.1	NM_031066	Rn.5468	Rn.5468	chr8:38078327-38123981 (+) // 98.82 // q21	fasciculation and elongation protein zeta 1 (zygin I)	Fez1	chr8q21	81730	NM_031066	---
1372280_at	NNN	0.198709	Asb2	ASB2	BI295982	chr6q32	1372280_at	702.033	1132	1138.66	470.029	329.679	90.0491	102.454	253.869	153.317	111	16.0742	Rn.3439.1	gb:BI295982 /DB_XREF=gi:14959971 /DB_XREF=UI-R-DK0-cfd-a-08-0-UI.s1 /CLONE=UI-R-DK0-cfd-a-08-0-UI /FEA=EST /CNT=16 /TID=Rn.3439.1 /TIER=Stack /STK=12 /UG=Rn.3439 /UG_TITLE=ESTs, Weakly similar to S68418 protein phosphatase 1M chain M110 isoform - rat (R.norvegicus)	BI295982	Rn.3439	Rn.98677	chr6:127609499-127612447 (-) // 100.0 // q32	ankyrin repeat and SOCS box-containing protein 2	Asb2	chr6q32	299266	NM_001011984	---
1372695_at	NNN	0.198682	---	---	AI172165	---	1372695_at	1094.62	2014.63	1655.28	725.826	414.777	156.573	239.664	225.321	317.041	201.722	150.963	Rn.18757.1	gb:AI172165 /DB_XREF=gi:3712205 /DB_XREF=EST218160 /CLONE=RMUBV74 /FEA=EST /CNT=11 /TID=Rn.18757.1 /TIER=Stack /STK=11 /UG=Rn.18757 /UG_TITLE=ESTs	AI172165	Rn.18757	Rn.216576	chr5:148304487-148304897 (+) // 84.81 // q36	Transcribed locus, strongly similar to XP_997117.1 PREDICTED: similar to fibronectin type III domain containing 5 [Mus musculus]	---	---	0	---	---
1386472_at	NNN	0.197829	---	---	H33301	---	1386472_at	125.332	33.3081	287.676	81.82	29.6768	26.1492	22.6619	17.7904	21.6796	14.9432	19.0647	Rn.32267.1	gb:H33301 /DB_XREF=gi:978718 /DB_XREF=EST109157 /CLONE=RPNAM37 /FEA=EST /CNT=1 /TID=Rn.32267.1 /TIER=ConsEnd /STK=1 /UG=Rn.32267 /UG_TITLE=ESTs	H33301	Rn.32267	Rn.125044	chr10:63112439-63112700 (-) // 31.42 // q24	Transcribed locus	---	---	0	---	---
1368127_at	NNN	0.193992	Neu2	NEU2	NM_017130	---	1368127_at	746.747	1258.59	1194.14	255.301	234.985	89.8009	63.0433	202.601	217.183	346.582	46.7814	Rn.9731.1	gb:NM_017130.1 /DB_XREF=gi:8393827 /GEN=Neu2 /FEA=FLmRNA /CNT=11 /TID=Rn.9731.1 /TIER=FL+Stack /STK=9 /UG=Rn.9731 /LL=29204 /DEF=Rattus norvegicus neuraminidase 2 (Neu2), mRNA. /PROD=neuraminidase 2 /FL=gb:NM_017130.1 gb:D16300.1	NM_017130	Rn.9731	Rn.9731	chr9:86553195-86556412 (+) // 92.6 // q35	neuraminidase 2	Neu2	---	29204	NM_017130	---
1372084_at	NNN	0.192925	Ptp4a3_predicted	PTP4A3_PREDICTED	AI104546	chr7q34	1372084_at	3227.25	2922.07	3983.62	1598.53	573.045	554.863	292.563	648.086	403.565	19.4697	48.8919	Rn.1234.1	gb:AI104546 /DB_XREF=gi:4134265 /DB_XREF=EST213835 /CLONE=RHECE91 /FEA=EST /CNT=20 /TID=Rn.1234.1 /TIER=Stack /STK=13 /UG=Rn.1234 /UG_TITLE=ESTs, Highly similar to protein tyrosine phosphatase 4a3 (Mus musculus) (M.musculus)	AI104546	Rn.1234	Rn.106043	chr7:111467620-111468045 (+) // 85.57 // q34	protein tyrosine phosphatase 4a3 (predicted)	Ptp4a3_predicted	chr7q34	362930	XM_001069043 /// XM_001069094 /// XM_343259	---
1390716_at	NNN	0.192899	---	---	BE098148	---	1390716_at	537.532	307.367	253.868	297.847	46.1831	64.3972	45.6447	46.1848	66.424	126.174	4.78254	Rn.45210.1	gb:BE098148 /DB_XREF=gi:8490052 /DB_XREF=UI-R-BJ1-ata-h-03-0-UI.s1 /CLONE=UI-R-BJ1-ata-h-03-0-UI /FEA=EST /CNT=4 /TID=Rn.45210.1 /TIER=ConsEnd /STK=4 /UG=Rn.45210 /UG_TITLE=ESTs	BE098148	Rn.45210	Rn.23254	chr16:49360786-49361202 (+) // 85.34 // q11	Transcribed locus	---	---	0	---	---
1375856_at	NNN	0.192884	---	---	AI102258	---	1375856_at	238.417	142.558	97.8032	227.176	11.3794	42.1977	6.53061	6.8209	55.1404	45.0833	2.92421	Rn.7450.1	gb:AI102258 /DB_XREF=gi:3707059 /DB_XREF=EST211547 /CLONE=RBRCB22 /FEA=EST /CNT=13 /TID=Rn.7450.1 /TIER=ConsEnd /STK=5 /UG=Rn.7450 /UG_TITLE=ESTs, Moderately similar to BI54 MOUSE BRAIN PROTEIN I54 (M.musculus)	AI102258	Rn.7450	Rn.7450	chr10:7036314-7037140 (-) // 91.06 // q12	Transcribed locus	---	---	0	---	---
1370363_at	NNN	0.192515	Ces3 /// LOC291863	CES3 /// LOC291863	L46791	chr19p11 /// chr19p12	1370363_at	3650.39	3038.42	3154.23	2186.71	2292.16	231.058	136.71	562.186	1275.79	100.672	35.0023	Rn.34885.1	gb:L46791.1 /DB_XREF=gi:1162963 /FEA=FLmRNA /CNT=16 /TID=Rn.34885.1 /TIER=FL+Stack /STK=7 /UG=Rn.34885 /LL=113902 /UG_GENE=Ces3 /DEF=Rattus norvegicus cholesterol esterase mRNA, complete cds. /PROD=cholesterol esterase /FL=gb:L81144.1 gb:L46791.1	L46791	Rn.34885	Rn.155930	chr19:14928576-14967082 (+) // 97.84 // p11 /// chrUn:9072273-9103759 (-) // 92.68 //	carboxylesterase 3 /// carboxylesterase-like	Ces3 /// LOC291863	chr19p11 /// chr19p12	0	NM_001013889 /// NM_133295	---
1372745_at	NNN	0.191819	---	---	BE112453	---	1372745_at	1858.97	2441.45	1869.82	1530.29	651.254	276.085	183.57	550.709	271.258	84.9951	100.014	Rn.7292.1	gb:BE112453 /DB_XREF=gi:8504558 /DB_XREF=UI-R-BJ1-avm-h-03-0-UI.s1 /CLONE=UI-R-BJ1-avm-h-03-0-UI /FEA=EST /CNT=17 /TID=Rn.7292.1 /TIER=Stack /STK=10 /UG=Rn.7292 /UG_TITLE=ESTs	BE112453	---	---	chr2:240242669-240243407 (-) // 100.0 // q44	---	---	---	0	---	---
1387022_at	NNN	0.19079	Aldh1a1	ALDH1A1	NM_022407	chr1q51	1387022_at	3665.28	2524.21	2026.41	2305.05	1583.02	411.656	173.231	657.139	605.428	77.4596	2.52557	Rn.6132.1	gb:NM_022407.2 /DB_XREF=gi:14192934 /GEN=Aldh1a1 /FEA=FLmRNA /CNT=16 /TID=Rn.6132.1 /TIER=FL+Stack /STK=11 /UG=Rn.6132 /LL=24188 /DEF=Rattus norvegicus Aldehyde dehydrogenase 1, subfamily A1 (Aldh1a1), mRNA. /PROD=Aldehyde dehydrogenase 1, subfamily A1 /FL=gb:NM_022407.2 gb:AF001898.1 gb:U79118.1 gb:AF001897.1 gb:L42009.1 gb:AF001896.1	NM_022407	Rn.6132	Rn.6132	chr1:223731674-223773284 (+) // 99.62 // q51	aldehyde dehydrogenase family 1, member A1	Aldh1a1	chr1q51	24188	NM_022407	---
1387121_a_at	NNN	0.190308	Ndrg2	NDRG2	NM_133583	chr15p14	1387121_a_at	6583.52	6743.32	5344.96	3715.8	2135.45	770.293	812.709	1189.72	960.833	258.104	131.154	Rn.3407.1	gb:NM_133583.1 /DB_XREF=gi:19424277 /GEN=Ndrg2 /FEA=FLmRNA /CNT=10 /TID=Rn.3407.1 /TIER=FL+Stack /STK=7 /UG=Rn.3407 /DEF=Rattus norvegicus N-myc downstream-regulated gene 2 (Ndrg2), mRNA. /PROD=N-myc downstream-regulated gene 2 /FL=gb:NM_133583.1 gb:AF334106.1	NM_133583	Rn.3407	Rn.3407	chr15:27338552-27347196 (-) // 98.71 // p14	N-myc downstream regulated gene 2	Ndrg2	chr15p14	171114	NM_133583	---
1368265_at	NNN	0.189772	Cyp2t1	CYP2T1	NM_134369	chr1q21	1368265_at	8345.05	4999.75	4985.55	4642.57	1542.96	465.777	935.188	1269.11	1051.86	8.50089	2.80304	Rn.43384.1	gb:NM_134369.1 /DB_XREF=gi:19705466 /GEN=Cyp2t1 /FEA=FLmRNA /CNT=8 /TID=Rn.43384.1 /TIER=FL+Stack /STK=7 /UG=Rn.43384 /LL=171380 /DEF=Rattus norvegicus cytochrome P450 monooxygenase CYP2T1 (Cyp2t1), mRNA. /PROD=cytochrome P450 monooxygenase CYP2T1 /FL=gb:NM_134369.1 gb:AF368269.1	NM_134369	Rn.43384	Rn.144661	chr1:82229580-82233248 (+) // 98.7 // q21	cytochrome P450 monooxygenase CYP2T1	Cyp2t1	chr1q21	171380	NM_134369	---
1368395_at	NNN	0.188863	Gpc3	GPC3	NM_012774	chrXq36	1368395_at	1148.29	990.645	679.458	809.645	311.84	167.342	5.87422	202.666	219.396	7.72555	5.11133	Rn.9717.1	gb:NM_012774.1 /DB_XREF=gi:6980975 /GEN=Gpc3 /FEA=FLmRNA /CNT=11 /TID=Rn.9717.1 /TIER=FL /STK=5 /UG=Rn.9717 /LL=25236 /DEF=Rattus norvegicus Glypican 3 (Gpc3), mRNA. /PROD=glypican 3 /FL=gb:M22400.1 gb:NM_012774.1	NM_012774	Rn.9717	Rn.9717	chrX:139192111-139560649 (-) // 91.4 // q36	glypican 3	Gpc3	chrXq36	25236	NM_012774	---
1369091_at	NNN	0.185086	Chrnb1	CHRNB1	NM_012528	chr10q24	1369091_at	167.479	297.026	206.532	84.9513	144.329	13.4967	18.567	62.363	38.8821	53.9698	51.4672	Rn.44611.1	gb:NM_012528.1 /DB_XREF=gi:6978656 /GEN=Chrnb1 /FEA=FLmRNA /CNT=5 /TID=Rn.44611.1 /TIER=FL /STK=2 /UG=Rn.44611 /LL=24261 /DEF=Rattus norvegicus Acetylcholine receptor beta (Chrnb1), mRNA. /PROD=acetylcholine receptor beta /FL=gb:NM_012528.1	NM_012528	Rn.44611	Rn.44611	chr10:56604893-56617423 (-) // 80.97 // q24	cholinergic receptor, nicotinic, beta polypeptide 1 (muscle)	Chrnb1	chr10q24	24261	NM_012528	---
1373696_at	NNN	0.184611	RGD1564859_predicted	RGD1564859_PREDICTED	AI171656	chr5q31	1373696_at	470.22	818.167	538.52	199.652	141.423	37.5761	97.7142	109.474	75.4235	10.641	126.975	Rn.7615.1	gb:AI171656 /DB_XREF=gi:3711696 /DB_XREF=EST217629 /CLONE=RMUBN90 /FEA=EST /CNT=8 /TID=Rn.7615.1 /TIER=Stack /STK=8 /UG=Rn.7615 /UG_TITLE=ESTs	AI171656	Rn.7615	Rn.7615	chr5:101455878-101456654 (+) // 33.8 // q31	RGD1564859 (predicted)	RGD1564859_predicted	chr5q31	362536	XM_001060074 /// XM_347061	---
1387047_at	NNN	0.183129	Hspb3	HSPB3	NM_031750	chr2q14	1387047_at	1446.3	2352.39	1181.93	787.407	372.616	221.107	89.6921	322.053	266.773	75.4591	16.7332	Rn.20155.1	gb:NM_031750.1 /DB_XREF=gi:13929051 /GEN=Hspb3 /FEA=FLmRNA /CNT=11 /TID=Rn.20155.1 /TIER=FL+Stack /STK=10 /UG=Rn.20155 /LL=78951 /DEF=Rattus norvegicus heat shock 27kD protein 3 (Hspb3), mRNA. /PROD=heat shock 27kD protein 3 /FL=gb:NM_031750.1 gb:AF203374.1	NM_031750	Rn.20155	Rn.20155	chr2:45078611-45079331 (-) // 96.77 // q14	heat shock 27kDa protein 3	Hspb3	chr2q14	78951	NM_031750	---
1378423_at	NNN	0.182255	---	---	AI639060	---	1378423_at	546.315	1290.31	992.252	420.332	322.282	93.3931	77.8616	141.368	208.115	121.815	57.4945	Rn.35336.1	gb:AI639060 /DB_XREF=gi:4700094 /DB_XREF=rx04926s /CLONE=rx04926 /FEA=EST /CNT=4 /TID=Rn.35336.1 /TIER=ConsEnd /STK=3 /UG=Rn.35336 /UG_TITLE=ESTs	AI639060	---	---	chr7:10000550-10001917 (+) // 98.64 // q11	---	---	---	0	---	---
1388795_at	NNN	0.181435	---	---	AI101500	---	1388795_at	558.209	776.018	711.246	443.749	145.668	128.424	13.3086	59.911	180.805	9.03828	8.25635	Rn.17209.1	gb:AI101500 /DB_XREF=gi:3706391 /DB_XREF=EST210789 /CLONE=RBRBR07 /FEA=EST /CNT=14 /TID=Rn.17209.1 /TIER=Stack /STK=11 /UG=Rn.17209 /UG_TITLE=ESTs	AI101500	Rn.17209	Rn.17209	chr1:30063588-30064048 (-) // 86.04 // p11	Transcribed locus	---	---	0	---	---
1388916_at	NNN	0.181102	---	---	BE109616	---	1388916_at	656.841	807.581	615.819	214.094	176.233	30.0472	98.629	155.707	73.5563	27.5835	51.3517	Rn.3821.1	gb:BE109616 /DB_XREF=gi:8501721 /DB_XREF=UI-R-BJ1-avq-b-10-0-UI.s1 /CLONE=UI-R-BJ1-avq-b-10-0-UI /FEA=EST /CNT=12 /TID=Rn.3821.1 /TIER=Stack /STK=10 /UG=Rn.3821 /UG_TITLE=ESTs	BE109616	Rn.3821	Rn.17586	chr5:126002434-126003146 (-) // 89.19 // q34	Transcribed locus	---	---	0	---	---
1370291_at	NNN	0.180393	Pdlim3	PDLIM3	AF002281	chr16q11	1370291_at	5428.35	7016.21	5150.68	3534.01	1767.66	849.797	520.338	1187.79	746.426	148.359	112.816	Rn.13361.1	gb:AF002281.1 /DB_XREF=gi:3138921 /FEA=FLmRNA /CNT=22 /TID=Rn.13361.1 /TIER=FL+Stack /STK=21 /UG=Rn.13361 /LL=114108 /UG_GENE=Pdlim3 /DEF=Rattus norvegicus alpha-actinin-2 associated LIM protein mRNA, complete cds. /PROD=alpha-actinin-2 associated LIM protein /FL=gb:AF002281.1	AF002281	Rn.13361	Rn.13361	chr16:49637067-49668804 (-) // 98.5 // q11	PDZ and LIM domain 3	Pdlim3	chr16q11	114108	NM_053650	---
1388689_at	NNN	0.176861	LOC682245	LOC682245	AI170755	---	1388689_at	248.279	368.983	161.268	113.187	43.6261	28.5624	29.7604	47.7655	26.2524	10.1623	10.4511	Rn.22481.1	gb:AI170755 /DB_XREF=gi:3710795 /DB_XREF=EST216694 /CLONE=RMUBB07 /FEA=EST /CNT=17 /TID=Rn.22481.1 /TIER=Stack /STK=12 /UG=Rn.22481 /UG_TITLE=ESTs, Highly similar to ACYM RAT ACYLPHOSPHATASE, MUSCLE TYPE ISOZYME (R.norvegicus)	AI170755	Rn.22481	---	chr14:111511956-111512679 (+) // 88.38 // q22	similar to Acylphosphatase, muscle type isozyme (Acylphosphate phosphohydrolase)	LOC682245	---	682245	XM_001059049 /// XM_001059111	---
1372856_at	NNN	0.174497	---	---	AI171219	---	1372856_at	1483.91	1205.19	1181.81	909.048	432.035	251.157	119.63	180.918	175.879	26.1408	77.5168	Rn.29462.1	gb:AI171219 /DB_XREF=gi:3711259 /DB_XREF=EST217173 /CLONE=RMUBH71 /FEA=EST /CNT=12 /TID=Rn.29462.1 /TIER=Stack /STK=10 /UG=Rn.29462 /UG_TITLE=ESTs	AI171219	Rn.29462	Rn.167154	chrUn:25692338-25692752 (+) // 94.09 //	Transcribed locus	---	---	0	---	---
1373915_at	NNN	0.169824	---	---	AI044427	---	1373915_at	3473.86	4019.81	3392.39	1797.13	860.191	524.789	257.042	582.272	475.893	234.102	306.913	Rn.6550.1	gb:AI044427 /DB_XREF=gi:3291330 /DB_XREF=UI-R-C1-jw-b-09-0-UI.s1 /CLONE=UI-R-C1-jw-b-09-0-UI /FEA=EST /CNT=11 /TID=Rn.6550.1 /TIER=Stack /STK=7 /UG=Rn.6550 /UG_TITLE=ESTs, Highly similar to dystrophia myotonica kinase, B15 (Mus musculus) (M.musculus)	AI044427	---	---	chr1:78450295-78451112 (+) // 99.51 // q21	---	---	---	0	---	---
1376280_at	NNN	0.168433	---	---	AA799789	---	1376280_at	77.136	72.2574	58.396	15.8312	17.8745	9.139	9.61498	9.47569	4.31102	30.7035	23.0417	Rn.30163.1	gb:AA799789 /DB_XREF=gi:4131438 /DB_XREF=EST189286 /CLONE=RHEAF37 /FEA=EST /CNT=6 /TID=Rn.30163.1 /TIER=ConsEnd /STK=5 /UG=Rn.30163 /UG_TITLE=ESTs	AA799789	---	---	chr17:21598326-21599036 (+) // 98.33 // p14	---	---	---	0	---	---
1373778_at	NNN	0.167683	---	---	BE349670	---	1373778_at	580.494	502.183	552.487	360.41	267.304	14.3531	19.323	181.12	88.7597	19.4194	70.7169	Rn.18425.1	gb:BE349670 /DB_XREF=gi:9261523 /DB_XREF=hq41d09.x1 /CLONE=IMAGE:3121937 /FEA=EST /CNT=8 /TID=Rn.18425.1 /TIER=Stack /STK=8 /UG=Rn.18425 /UG_TITLE=ESTs	BE349670	Rn.18425	Rn.44359	chr12:43387423-43387829 (-) // 95.53 // q16	Transcribed locus	---	---	0	---	---
1371746_at	NNN	0.16574	---	---	AW525288	---	1371746_at	1537.26	1352.59	1398.15	1322.31	441.932	170.32	66.2792	348.737	217.145	76.0162	63.491	Rn.13646.1	gb:AW525288 /DB_XREF=gi:7167638 /DB_XREF=UI-R-BJ0p-aip-e-10-0-UI.s1 /CLONE=UI-R-BJ0p-aip-e-10-0-UI /FEA=EST /CNT=20 /TID=Rn.13646.1 /TIER=Stack /STK=17 /UG=Rn.13646 /UG_TITLE=ESTs	AW525288	Rn.13646	Rn.13646	chr10:11217988-11218663 (+) // 89.48 // q12	Transcribed locus	---	---	0	---	---
1372595_at	NNN	0.16479	Actn2_predicted	ACTN2_PREDICTED	BF284889	chr17q12.1	1372595_at	4825.83	6046.19	4346.66	4790.87	1618.31	859.778	186.068	1262.41	542.987	17.5782	15.2868	Rn.3970.1	gb:BF284889 /DB_XREF=gi:11215959 /DB_XREF=EST449480 /CLONE=RGIEX47 /FEA=EST /CNT=13 /TID=Rn.3970.1 /TIER=Stack /STK=11 /UG=Rn.3970 /UG_TITLE=ESTs, Moderately similar to JC7186 alpha-actinin-4 - rat (R.norvegicus)	BF284889	Rn.3970	Rn.3970	chr17:68766381-68773258 (+) // 97.06 // q12.1	actinin alpha 2 (predicted)	Actn2_predicted	chr17q12.1	291245	XM_001061664 /// XM_214499	---
1376970_at	NNN	0.164743	RGD1308722_predicted	RGD1308722_PREDICTED	AW530127	chr20p12	1376970_at	57.967	72.8331	68.4689	50.9806	19.4353	9.86824	7.69721	13.0297	4.94772	49.6549	4.97246	Rn.41811.1	gb:AW530127 /DB_XREF=gi:7172541 /DB_XREF=UI-R-C4-ald-h-02-0-UI.s1 /CLONE=UI-R-C4-ald-h-02-0-UI /FEA=EST /CNT=5 /TID=Rn.41811.1 /TIER=ConsEnd /STK=4 /UG=Rn.41811 /UG_TITLE=ESTs	AW530127	Rn.41811	Rn.41811	chr20:12587681-12588294 (+) // 100.0 // p12	similar to RIKEN cDNA A130042E20; open reading frame 57 (predicted)	RGD1308722_predicted	chr20p12	361822	NM_001108529 /// XM_001079676 /// XM_342116	---
1389066_at	NNN	0.162084	Dscr1l1	DSCR1L1	BI274408	chr9q12	1389066_at	1424.31	1257.36	883.267	612.444	283.485	90.7696	199.951	153.899	133.809	6.99406	40.1551	Rn.24428.1	gb:BI274408 /DB_XREF=gi:14885291 /DB_XREF=UI-R-CW0-bwi-e-11-0-UI.s1 /CLONE=UI-R-CW0-bwi-e-11-0-UI /FEA=EST /CNT=10 /TID=Rn.24428.1 /TIER=Stack /STK=9 /UG=Rn.24428 /UG_TITLE=ESTs	BI274408	Rn.24428	Rn.24428	chr9:12623122-12623685 (-) // 95.25 // q12	Down syndrome critical region gene 1-like 1	Dscr1l1	chr9q12	140666	NM_175578	---
1367964_at	NNN	0.160745	Tnni2	TNNI2	NM_017185	chr1q41	1367964_at	30561.9	38142.9	38596.4	36264	14250.1	5472.3	1816.47	8013.17	4992.51	247.157	9.33637	Rn.9924.1	gb:NM_017185.1 /DB_XREF=gi:8394465 /GEN=Tnni2 /FEA=FLmRNA /CNT=15 /TID=Rn.9924.1 /TIER=FL+Stack /STK=12 /UG=Rn.9924 /LL=29389 /DEF=Rattus norvegicus troponin I, skeletal, fast 2 (Tnni2), mRNA. /PROD=troponin I, skeletal, fast 2 /FL=gb:NM_017185.1 gb:M73701.1	NM_017185	Rn.9924	Rn.9924	chr1:202687601-202690172 (+) // 96.19 // q41	troponin I type 2 (skeletal, fast)	Tnni2	chr1q41	29389	NM_017185	Striated_muscle_contraction // GenMAPP
1388866_at	NNN	0.160564	RGD1559723_predicted	RGD1559723_PREDICTED	AA799392	chr4q44	1388866_at	1500.18	2164.21	1296.68	879.046	495.319	172.339	158.524	269.18	213.751	80.8479	42.6425	Rn.6181.1	gb:AA799392 /DB_XREF=gi:2862347 /DB_XREF=EST188889 /CLONE=RHEAA72 /FEA=EST /CNT=18 /TID=Rn.6181.1 /TIER=Stack /STK=10 /UG=Rn.6181 /UG_TITLE=ESTs	AA799392	Rn.6181	Rn.22364	chr4:183578950-183580054 (+) // 94.23 // q44	similar to Sspn protein (predicted)	RGD1559723_predicted	chr4q44	500364	NM_001109255 /// XM_001075000 /// XM_575721	---
1373082_at	NNN	0.160477	---	---	AA893743	---	1373082_at	1564.03	2006.14	1854.33	872.566	434.891	149.411	140.916	291.092	282.842	103.046	82.7939	Rn.8002.1	gb:AA893743 /DB_XREF=gi:3020622 /DB_XREF=EST197546 /CLONE=RPLAK14 /FEA=EST /CNT=13 /TID=Rn.8002.1 /TIER=Stack /STK=9 /UG=Rn.8002 /UG_TITLE=ESTs	AA893743	Rn.8002	Rn.164219	chr2:96522028-96522616 (-) // 89.74 // q23	Transcribed locus	---	---	0	---	---
1390355_at	NNN	0.158802	Ryr1	RYR1	AI575442	chr1q21	1390355_at	2342.52	2178.26	1392.49	1696.99	643.532	214.34	88.0867	428.429	317.721	35.328	23.1896	Rn.38647.1	gb:AI575442 /DB_XREF=gi:4559818 /DB_XREF=UI-R-Y0-vg-d-11-0-UI.s1 /CLONE=UI-R-Y0-vg-d-11-0-UI /FEA=EST /CNT=5 /TID=Rn.38647.1 /TIER=ConsEnd /STK=5 /UG=Rn.38647 /UG_TITLE=ESTs, Weakly similar to B36579 inositol 1,4,5-triphosphate receptor 2 - rat (R.norvegicus)	AI575442	Rn.38647	Rn.87520	chr1:84116099-84117571 (-) // 100.0 // q21	ryanodine receptor 1, skeletal muscle	Ryr1	chr1q21	114207	XM_001078539 /// XM_341818	Calcium_regulation_in_cardiac_cells // GenMAPP /// Calcium_regulation_in_cardiac_cells // GenMAPP /// Calcium_regulation_in_cardiac_cells // GenMAPP /// Smooth_muscle_contraction // GenMAPP /// Smooth_muscle_contraction // GenMAPP /// Smooth_muscle_contraction // GenMAPP
1372240_at	NNN	0.158796	Sgca_predicted	SGCA_PREDICTED	BG378841	chr10q31	1372240_at	1621.71	1610.06	1196.01	1051.25	844.256	236.397	66.7562	298.068	202.069	128.852	107.348	Rn.23558.1	gb:BG378841 /DB_XREF=gi:13303313 /DB_XREF=UI-R-CV1-bvt-e-04-0-UI.s1 /CLONE=UI-R-CV1-bvt-e-04-0-UI /FEA=EST /CNT=13 /TID=Rn.23558.1 /TIER=Stack /STK=13 /UG=Rn.23558 /UG_TITLE=ESTs, Highly similar to JC5556 adhalin - mouse (M.musculus)	BG378841	Rn.23558	Rn.136653	chr10:83647337-83647921 (-) // 100.0 // q31	sarcoglycan, alpha (dystrophin-associated glycoprotein) (predicted)	Sgca_predicted	chr10q31	303468	NM_001107039 /// XM_001081302 /// XM_220884	---
1389583_at	NNN	0.15703	RGD1566169_predicted	RGD1566169_PREDICTED	BF282712	chr5q36	1389583_at	250.367	385.163	234.968	50.5172	60.0933	4.78612	4.01101	26.2784	88.1755	7.84201	3.01497	Rn.12049.1	gb:BF282712 /DB_XREF=gi:11213782 /DB_XREF=EST447303 /CLONE=RGIDS05 /FEA=EST /CNT=10 /TID=Rn.12049.1 /TIER=Stack /STK=6 /UG=Rn.12049 /UG_TITLE=ESTs	BF282712	Rn.12049	Rn.104972	chr5:160518943-160519783 (-) // 46.56 // q36	similar to Hypothetical protein MGC37938 (predicted)	RGD1566169_predicted	chr5q36	298605	XM_001072960 /// XM_238429	---
1379884_at	NNN	0.155467	Asph_predicted	ASPH_PREDICTED	AA799621	chr5q13	1379884_at	836.725	1538.3	1206.25	599.163	497.681	166.861	98.3922	170.152	146.43	87.8572	41.5457	Rn.22695.1	gb:AA799621 /DB_XREF=gi:4131418 /DB_XREF=EST189118 /CLONE=RHEAD26 /FEA=EST /CNT=4 /TID=Rn.22695.1 /TIER=ConsEnd /STK=2 /UG=Rn.22695 /UG_TITLE=ESTs	AA799621	Rn.22695	Rn.22695	chr5:23495763-23496557 (-) // 94.71 // q13	aspartate-beta-hydroxylase (predicted)	Asph_predicted	chr5q13	312981	NM_001098239 /// XM_001063780 /// XM_232675	---
1388961_at	NNN	0.154846	Itgb1bp2_predicted	ITGB1BP2_PREDICTED	BF407194	chrXq31	1388961_at	1169.86	1362.11	901.871	638.394	244.183	208.799	91.7314	131.206	102.968	79.9649	16.4215	Rn.39792.1	gb:BF407194 /DB_XREF=gi:11395169 /DB_XREF=UI-R-BJ2-bqw-g-06-0-UI.s1 /CLONE=UI-R-BJ2-bqw-g-06-0-UI /FEA=EST /CNT=10 /TID=Rn.39792.1 /TIER=Stack /STK=10 /UG=Rn.39792 /UG_TITLE=ESTs, Highly similar to AF140691 1 melusin (M.musculus)	BF407194	Rn.39792	Rn.39792	chrX:89524272-89525357 (+) // 100.0 // q31	integrin beta 1 binding protein 2 (predicted)	Itgb1bp2_predicted	chrXq31	317258	NM_001108245 /// XM_001069915 /// XM_228553	---
1370026_at	NNN	0.154364	Cryab	CRYAB	NM_012935	chr8q23	1370026_at	11830.3	16600.7	17090.9	12490.2	6802.75	2945.35	691.115	2449.1	1918.51	535.221	1028.02	Rn.54554.1	gb:NM_012935.1 /DB_XREF=gi:16905066 /GEN=Cryab /FEA=FLmRNA /CNT=65 /TID=Rn.54554.1 /TIER=FL+Stack /STK=8 /UG=Rn.54554 /LL=25420 /DEF=Rattus norvegicus Crystallin, alpha polypeptide 2 (Cryab), mRNA. /PROD=crystallin, alpha polypeptide 2 /FL=gb:NM_012935.1 gb:M55534.1	NM_012935	Rn.54554	Rn.98208	chr8:54107252-54111506 (+) // 97.19 // q23	crystallin, alpha B	Cryab	chr8q23	25420	NM_012935	---
1390339_at	NNN	0.153856	Usp13_predicted	USP13_PREDICTED	BE099435	chr2q25	1390339_at	907.908	1022.16	630.866	452.435	292.739	52.1931	73.0741	156.711	124.954	39.2169	43.7446	Rn.16802.1	gb:BE099435 /DB_XREF=gi:8491351 /DB_XREF=UI-R-BJ1-atw-g-11-0-UI.s1 /CLONE=UI-R-BJ1-atw-g-11-0-UI /FEA=EST /CNT=5 /TID=Rn.16802.1 /TIER=ConsEnd /STK=5 /UG=Rn.16802 /UG_TITLE=ESTs	BE099435	Rn.16802	Rn.16802	chr2:119118208-119118678 (+) // 99.36 // q25	Ubiquitin specific protease 13 (isopeptidase T-3) (predicted)	Usp13_predicted	chr2q25	310306	NM_001107665 /// XM_001066621 /// XM_227025	---
1387271_at	NNN	0.153607	Phyh	PHYH	NM_053674	chr17q12.3	1387271_at	2916.55	3292.95	2916.37	1667.42	585.854	279.232	399.402	363.005	356.693	12.2371	102.646	Rn.80832.1	gb:NM_053674.1 /DB_XREF=gi:16758485 /GEN=Phyh /FEA=FLmRNA /CNT=9 /TID=Rn.80832.1 /TIER=FL /STK=3 /UG=Rn.80832 /LL=114209 /DEF=Rattus norvegicus phytanoyl-CoA hydroxylase (Refsum disease) (Phyh), mRNA. /PROD=phytanoyl-CoA hydroxylase (Refsum disease) /FL=gb:AF121345.1 gb:NM_053674.1	NM_053674	Rn.80832	Rn.7279	chr17:84418171-84435118 (-) // 86.53 // q12.3	phytanoyl-CoA hydroxylase	Phyh	chr17q12.3	114209	NM_053674	---
1367742_at	NNN	0.152932	Cpt1b	CPT1B	NM_013200	chr7q34	1367742_at	2509.37	2179.28	1595.02	1644.79	870.804	267.861	180.015	292.423	336.256	106.326	79.3965	Rn.6028.1	gb:NM_013200.1 /DB_XREF=gi:6978702 /GEN=Cpt1b /FEA=FLmRNA /CNT=27 /TID=Rn.6028.1 /TIER=FL+Stack /STK=19 /UG=Rn.6028 /LL=25756 /DEF=Rattus norvegicus Carnitine palmitoyltransferase 1 beta, muscle isoform (Cpt1b), mRNA. /PROD=carnitine palmitoyltransferase 1 beta, muscleisoform /FL=gb:NM_013200.1 gb:D43623.1	NM_013200	Rn.6028	Rn.6028	chr7:127737128-127746179 (-) // 99.3 // q34	carnitine palmitoyltransferase 1b, muscle	Cpt1b	chr7q34	25756	NM_013200	Fatty_Acid_Degradation // GenMAPP /// Mitochondrial_fatty_acid_betaoxidation // GenMAPP
1390281_a_at	NNN	0.152813	Coq10a_predicted	COQ10A_PREDICTED	AI407062	chr7q11	1390281_a_at	1757	2630.75	2185.84	1896.43	642.278	175.517	290.758	358.381	289.323	415.462	210.39	Rn.25373.1	gb:AI407062 /DB_XREF=gi:4250566 /DB_XREF=EST235350 /CLONE=ROVDR47 /FEA=EST /CNT=5 /TID=Rn.25373.1 /TIER=ConsEnd /STK=5 /UG=Rn.25373 /UG_TITLE=ESTs	AI407062	Rn.25373	Rn.25373	chr7:1654165-1654788 (-) // 100.0 // q11	coenzyme Q10 homolog A (yeast) (predicted)	Coq10a_predicted	chr7q11	362810	NM_001108727 /// XM_001067009 /// XM_343138	---
1371679_at	NNN	0.151586	---	---	BE113393	---	1371679_at	4168.56	4693.7	3582.8	2341.84	1216.89	467.437	221.577	712.352	539.396	48.0889	118.094	Rn.7078.1	gb:BE113393 /DB_XREF=gi:8505498 /DB_XREF=UI-R-BJ1-awe-g-12-0-UI.s1 /CLONE=UI-R-BJ1-awe-g-12-0-UI /FEA=EST /CNT=18 /TID=Rn.7078.1 /TIER=Stack /STK=18 /UG=Rn.7078 /UG_TITLE=ESTs	BE113393	---	---	chr2:219818270-219818894 (-) // 99.68 // q42	---	---	---	0	---	---
1371247_at	NNN	0.151339	Tnnt3	TNNT3	BF521859	chr1q41-q42	1371247_at	21868.2	21712.5	21141.5	18603.2	6959.03	2898.62	562.026	5182.3	2287.94	86.6821	87.805	Rn.22504.1	gb:BF521859 /DB_XREF=gi:11629826 /DB_XREF=UI-R-C2p-nq-h-04-0-UI.r1 /CLONE=UI-R-C2p-nq-h-04-0-UI /FEA=DNA_2 /CNT=56 /TID=Rn.22504.1 /TIER=Stack /STK=10 /UG=Rn.22504 /UG_TITLE=Rat fast skeletal TnT gene encoding troponin T isoforms, complete cds	BF521859	Rn.22504	Rn.15488	chr1:202757057-202762144 (+) // 82.52 // q41	troponin T3, skeletal, fast	Tnnt3	chr1q41-q42	24838	NM_031532	Striated_muscle_contraction // GenMAPP /// Striated_muscle_contraction // GenMAPP
1381575_at	NNN	0.151027	Neb_predicted	NEB_PREDICTED	AI638986	chr3q12	1381575_at	2492.9	2385.78	1853.91	1431.37	814.543	278.917	121.387	299.297	385.195	63.08	21.4826	Rn.15517.1	gb:AI638986 /DB_XREF=gi:4700020 /DB_XREF=rx00108s /CLONE=rx00108 /FEA=EST /CNT=2 /TID=Rn.15517.1 /TIER=ConsEnd /STK=2 /UG=Rn.15517 /UG_TITLE=ESTs, Moderately similar to LAS1 MOUSE LIM AND SH3 DOMAIN PROTEIN 1 (M.musculus)	AI638986	Rn.15517	Rn.134031	chr3:33634432-33634813 (-) // 100.0 // q12	nebulin (predicted)	Neb_predicted	chr3q12	311029	NM_001107731 /// XM_001056398 /// XM_229925	---
1368608_at	NNN	0.150239	Cyp2f4	CYP2F4	NM_019303	chr1q21	1368608_at	7543.73	4046.9	3987.41	4907.14	944.03	340.061	728.912	1096.15	410.48	112.645	3.96246	Rn.10817.1	gb:NM_019303.1 /DB_XREF=gi:9506530 /GEN=Cyp2f1 /FEA=FLmRNA /CNT=5 /TID=Rn.10817.1 /TIER=FL /STK=4 /UG=Rn.10817 /LL=54246 /DEF=Rattus norvegicus Cytochrome P450, subfamily IIF, polypeptide 1 (Cyp2f1), mRNA. /PROD=Cytochrome P450, subfamily IIF, polypeptide 1 /FL=gb:AF017393.1 gb:NM_019303.1	NM_019303	Rn.10817	Rn.10817	chr1:82191740-82204628 (+) // 85.75 // q21	cytochrome P450, family 2, subfamily f, polypeptide 4	Cyp2f4	chr1q21	54246	NM_019303	---
1389180_at	NNN	0.149901	---	---	AI175035	---	1389180_at	760.895	1108.54	1254.96	399.954	236.491	75.6305	56.6023	168.049	150.722	43.1845	183.328	Rn.6488.1	gb:AI175035 /DB_XREF=gi:3725673 /DB_XREF=EST218553 /CLONE=RMUCB35 /FEA=EST /CNT=10 /TID=Rn.6488.1 /TIER=Stack /STK=8 /UG=Rn.6488 /UG_TITLE=ESTs	AI175035	Rn.6488	Rn.6488	chr19:22371316-22372247 (-) // 100.0 // q11	Transcribed locus	---	---	0	---	---
1389398_at	NNN	0.149876	Ank1	ANK1	AI172141	chr16q12.5	1389398_at	605.952	735.802	796.572	355.549	187.6	41.3608	34.3399	165.912	79.897	35.9965	11.6193	Rn.20868.1	gb:AI172141 /DB_XREF=gi:3712181 /DB_XREF=EST218136 /CLONE=RMUBV42 /FEA=EST /CNT=9 /TID=Rn.20868.1 /TIER=Stack /STK=7 /UG=Rn.20868 /UG_TITLE=ESTs, Highly similar to 1921313A ankyrin R (R.norvegicus)	AI172141	Rn.20868	Rn.20868	chr16:73335424-73336404 (-) // 99.9 // q12.5	ankyrin 1, erythroid	Ank1	chr16q12.5	306570	NM_001107322 /// XM_001072814 /// XM_240464	---
1387958_at	NNN	0.149456	Akr1c18	AKR1C18	L32601	chr17q12.3	1387958_at	969.65	1012.93	857.037	575.928	638.597	153.547	49.0235	134.437	147.725	91.6519	10.2162	Rn.10030.1	gb:L32601.1 /DB_XREF=gi:506414 /FEA=FLmRNA /CNT=5 /TID=Rn.10030.1 /TIER=FL /STK=4 /UG=Rn.10030 /LL=171516 /UG_GENE=LOC171516 /DEF=Rat 20 alpha-hydroxysteroid dehydrogenase mRNA, complete cds. /PROD=20-alpha-hydroxysteroid dehydrogenase /FL=gb:L32601.1 gb:D14424.1	L32601	Rn.10030	Rn.10030	chr17:77269625-77286527 (+) // 99.18 // q12.3	aldo-keto reductase family 1, member C18	Akr1c18	chr17q12.3	171516	NM_138510	---
1367851_at	NNN	0.149165	Ptgds	PTGDS	J04488	chr3p13	1367851_at	54.0551	62.7651	91.969	61.8569	65.6589	5.49537	7.71683	18.2069	8.71295	4.07247	4.18858	Rn.11400.1	gb:J04488.1 /DB_XREF=gi:206114 /FEA=FLmRNA /CNT=21 /TID=Rn.11400.1 /TIER=FL+Stack /STK=15 /UG=Rn.11400 /LL=25526 /UG_GENE=Ptgds /UG_TITLE=Prostaglandin D synthase /DEF=Rat prostaglandin D synthetase mRNA, complete cds. /FL=gb:NM_013015.1 gb:J04488.1	J04488	Rn.11400	Rn.11400	chr3:3632681-3635626 (-) // 97.59 // p13	prostaglandin D2 synthase	Ptgds	chr3p13	25526	NM_013015	Eicosanoid_Synthesis // GenMAPP /// Prostaglandin_synthesis_regulation // GenMAPP
1372736_at	NNN	0.149002	Agl_predicted	AGL_PREDICTED	BG374196	chr2q41	1372736_at	2256.22	2725.76	2100.83	1060.46	605.693	212.818	247.79	302.744	279.542	161.597	237.073	Rn.15222.1	gb:BG374196 /DB_XREF=gi:13298668 /DB_XREF=UI-R-CV1-bsm-e-06-0-UI.s1 /CLONE=UI-R-CV1-bsm-e-06-0-UI /FEA=EST /CNT=15 /TID=Rn.15222.1 /TIER=Stack /STK=10 /UG=Rn.15222 /UG_TITLE=ESTs	BG374196	Rn.15222	Rn.34559	chr2:212986547-212987247 (-) // 82.0 // q41	amylo-1, 6-glucosidase, 4-alpha-glucanotransferase (glycogen debranching enzyme, glycogen storage disease type III) (predicted)	Agl_predicted	chr2q41	362029	NM_001108564 /// XM_001073642 /// XM_342331	---
1374218_at	NNN	0.148593	LOC685244	LOC685244	BG379491	chrXq21	1374218_at	335.561	372.193	365.277	162.162	107.596	8.85424	5.18141	90.6558	54.9323	7.31687	10.676	Rn.12018.1	gb:BG379491 /DB_XREF=gi:13303963 /DB_XREF=UI-R-CS0-bth-e-07-0-UI.s1 /CLONE=UI-R-CS0-bth-e-07-0-UI /FEA=EST /CNT=8 /TID=Rn.12018.1 /TIER=Stack /STK=7 /UG=Rn.12018 /UG_TITLE=ESTs	BG379491	Rn.12018	Rn.12018	chrX:41701624-41702283 (+) // 94.0 // q21	similar to IQ motif and Sec7 domain 2	LOC685244	chrXq21	685244	XM_001060017	---
1389449_at	NNN	0.147947	RGD1306911_predicted	RGD1306911_PREDICTED	AI171994	chr15p13	1389449_at	936.95	1193.29	1280.15	1167.39	388.763	78.1617	154.004	219.881	135.782	51.6131	95.0731	Rn.22380.1	gb:AI171994 /DB_XREF=gi:3712034 /DB_XREF=EST217988 /CLONE=RMUBT61 /FEA=EST /CNT=8 /TID=Rn.22380.1 /TIER=Stack /STK=7 /UG=Rn.22380 /UG_TITLE=ESTs	AI171994	Rn.22380	Rn.22380	chr15:33709494-33709895 (+) // 95.48 // p13	similar to CG10671-like (predicted)	RGD1306911_predicted	chr15p13	290223	NM_001106037 /// XM_001055627 /// XM_214169	---
1370218_at	NNN	0.145889	Ldhb	LDHB	AA848319	chr4q44	1370218_at	5198.02	6546.1	3715.28	4135.3	1487.8	479.805	472.024	865.768	642.963	88.6395	693.456	Rn.1785.1	gb:AA848319 /DB_XREF=gi:2935859 /DB_XREF=EST191079 /CLONE=RHEAL40 /FEA=FLmRNA /CNT=89 /TID=Rn.1785.1 /TIER=Stack /STK=11 /UG=Rn.1785 /LL=24534 /UG_GENE=Ldhb /UG_TITLE=Lactate dehydrogenease B /FL=gb:U07181.1 gb:NM_012595.1	AA848319	Rn.1785	Rn.1785	chr4:180061561-180077280 (-) // 96.47 // q44	lactate dehydrogenase B	Ldhb	chr4q44	24534	NM_012595	Glycolysis_and_Gluconeogenesis // GenMAPP
1375840_at	NNN	0.145522	---	---	BF404611	---	1375840_at	20.2351	73.2265	99.9997	108.49	35.2871	8.86759	8.16164	9.2655	12.9657	14.7291	11.7465	Rn.59963.1	gb:BF404611 /DB_XREF=gi:11392586 /DB_XREF=UI-R-CA1-bih-e-06-0-UI.s1 /CLONE=UI-R-CA1-bih-e-06-0-UI /FEA=EST /CNT=6 /TID=Rn.59963.1 /TIER=Stack /STK=6 /UG=Rn.59963 /UG_TITLE=ESTs	BF404611	Rn.59963	Rn.173312	chr10:78740751-78741112 (-) // 97.25 // q26	Transcribed locus	---	---	0	---	---
1373108_at	NNN	0.145137	Ppp1r3c	PPP1R3C	BM390827	chr1q53	1373108_at	1724.42	1133.02	773.33	833.999	305.49	155.545	22.3659	261.749	114.211	7.71159	269.461	Rn.1767.1	gb:BM390827 /DB_XREF=gi:18190880 /DB_XREF=UI-R-CN1-cjo-j-16-0-UI.s1 /CLONE=UI-R-CN1-cjo-j-16-0-UI /FEA=EST /CNT=13 /TID=Rn.1767.1 /TIER=Stack /STK=9 /UG=Rn.1767 /UG_TITLE=ESTs	BM390827	Rn.1767	Rn.162528	chr1:240991881-240992552 (-) // 99.7 // q53	protein phosphatase 1, regulatory (inhibitor) subunit 3C	Ppp1r3c	chr1q53	309513	NM_001012072	---
1374099_at	NNN	0.144182	Nrap_predicted	NRAP_PREDICTED	BM386665	chr1q55	1374099_at	1493.69	1905.12	4145.1	897.341	765.537	289.225	114.448	409.851	248.435	192.583	8.20425	Rn.35035.1	gb:BM386665 /DB_XREF=gi:18186718 /DB_XREF=UI-R-CN1-cjg-l-07-0-UI.s1 /CLONE=UI-R-CN1-cjg-l-07-0-UI /FEA=EST /CNT=9 /TID=Rn.35035.1 /TIER=Stack /STK=7 /UG=Rn.35035 /UG_TITLE=ESTs, Weakly similar to nebulin-related anchoring protein (Mus musculus) (M.musculus)	BM386665	Rn.35035	Rn.35035	chr1:262591455-262593328 (-) // 97.76 // q55	nebulin-related anchoring protein (predicted)	Nrap_predicted	chr1q55	307982	NM_001107443 /// XM_001063440 /// XM_217637	---
1370092_at	NNN	0.143843	Mas1	MAS1	NM_012757	chr1q11-q12	1370092_at	13.6629	37.3771	69.723	64.0242	14.1619	7.66359	5.03963	6.2271	3.9637	74.8319	2.28796	Rn.21943.1	gb:NM_012757.1 /DB_XREF=gi:6981185 /GEN=Mas1 /FEA=FLmRNA /CNT=4 /TID=Rn.21943.1 /TIER=FL /STK=2 /UG=Rn.21943 /LL=25153 /DEF=Rattus norvegicus MAS1 oncogene (Mas1), mRNA. /PROD=MAS1 oncogene /FL=gb:NM_012757.1	NM_012757	Rn.21943	Rn.21943	chr1:42184266-42185553 (+) // 100.0 // q11	MAS1 oncogene	Mas1	chr1q11-q12	25153	NM_012757	GPCRDB_Class_A_Rhodopsin-like // GenMAPP
1372790_at	NNN	0.141039	Mdh1	MDH1	BG671530	chr14q22	1372790_at	1513.16	2701.55	2293.03	1081.51	455.481	147.831	250.563	192.67	316.631	178.73	82.922	Rn.13492.1	gb:BG671530 /DB_XREF=gi:13893629 /DB_XREF=DRNBTG07 /CLONE=DRNBTG07 /FEA=EST /CNT=13 /TID=Rn.13492.1 /TIER=Stack /STK=10 /UG=Rn.13492 /UG_TITLE=ESTs	BG671530	Rn.13492	Rn.13492	chr14:102258211-102258881 (-) // 71.21 // q22	Malate dehydrogenase 1, NAD (soluble)	Mdh1	chr14q22	24551	NM_033235	Glycolysis_and_Gluconeogenesis // GenMAPP /// Krebs-TCA_Cycle // GenMAPP
1375255_at	NNN	0.138889	Mast2_predicted	MAST2_PREDICTED	AW531105	chr5q36	1375255_at	53.9983	74.4513	73.3993	59.6505	4.2248	3.36215	4.0781	6.59063	15.494	11.0436	5.94919	Rn.38324.1	gb:AW531105 /DB_XREF=gi:7173519 /DB_XREF=UI-R-C4-alg-g-04-0-UI.s1 /CLONE=UI-R-C4-alg-g-04-0-UI /FEA=EST /CNT=14 /TID=Rn.38324.1 /TIER=Stack /STK=12 /UG=Rn.38324 /UG_TITLE=ESTs, Highly similar to A54602 microtubule-associated serinethreonine protein kinase MAST205 - mouse (M.musculus)	AW531105	Rn.38324	Rn.11677	chr5:136684781-136717367 (+) // 93.17 // q36	Microtubule associated serine/threonine kinase 2 (predicted)	Mast2_predicted	chr5q36	313819	NM_001108005 /// XM_001070900 /// XM_233782	---
1372296_at	NNN	0.137958	RGD1563599_predicted	RGD1563599_PREDICTED	AA800892	chr11q11	1372296_at	3295.39	3718.14	3145.72	1824.26	879.556	249.822	124.409	511.341	534.078	94.6737	36.843	Rn.4128.1	gb:AA800892 /DB_XREF=gi:2863847 /DB_XREF=EST190389 /CLONE=RLUAM71 /FEA=EST /CNT=15 /TID=Rn.4128.1 /TIER=Stack /STK=12 /UG=Rn.4128 /UG_TITLE=ESTs	AA800892	Rn.4128	Rn.4128	chr11:36531936-36535444 (+) // 79.58 // q11	similar to putative SH3BGR protein (predicted)	RGD1563599_predicted	chr11q11	498066	XM_001053494 /// XM_573265	---
1374989_at	NNN	0.1375	Asb12	ASB12	BI290522	chrXq31	1374989_at	793.715	704.942	537.035	293.915	203.022	58.8174	15.6414	119.981	84.1493	40.2767	109.494	Rn.8275.1	gb:BI290522 /DB_XREF=gi:14949168 /DB_XREF=UI-R-DK0-cgd-c-04-0-UI.s1 /CLONE=UI-R-DK0-cgd-c-04-0-UI /FEA=EST /CNT=6 /TID=Rn.8275.1 /TIER=Stack /STK=6 /UG=Rn.8275 /UG_TITLE=ESTs	BI290522	Rn.8275	Rn.8275	chrX:83013798-83014739 (-) // 100.0 // q31	ankyrin repeat and SOCS box-containing protein 12	Asb12	chrXq31	503446	NM_001037367	---
1367782_at	NNN	0.137436	Cox6a2	COX6A2	NM_012812	chr1q36	1367782_at	17250.6	17086	17756	14556.6	6883.86	2481.7	535.716	2621.11	2446.39	25.2664	4.70419	Rn.5119.1	gb:NM_012812.1 /DB_XREF=gi:6978690 /GEN=Cox6a2 /FEA=FLmRNA /CNT=20 /TID=Rn.5119.1 /TIER=FL+Stack /STK=18 /UG=Rn.5119 /LL=25278 /DEF=Rattus norvegicus Cytochrome c oxidase subunit VIa polypeptide 2 (heart) (Cox6a2), mRNA. /PROD=cytochrome c oxidase subunit VIa polypeptide 2(heart) /FL=gb:NM_012812.1	NM_012812	Rn.5119	Rn.5119	chr1:187464578-187465298 (-) // 100.0 // q36	cytochrome c oxidase, subunit VIa, polypeptide 2	Cox6a2	chr1q36	25278	NM_001109994 /// NM_012812	Electron_Transport_Chain // GenMAPP
1374012_at	NNN	0.134645	Mg29_predicted	MG29_PREDICTED	AI171372	chr2q34	1374012_at	748.649	1208.42	954.411	693.698	297.156	133.451	18.4055	138.161	130.327	12.601	5.5094	Rn.6456.1	gb:AI171372 /DB_XREF=gi:3711412 /DB_XREF=EST217328 /CLONE=RMUBJ84 /FEA=EST /CNT=9 /TID=Rn.6456.1 /TIER=Stack /STK=7 /UG=Rn.6456 /UG_TITLE=ESTs	AI171372	Rn.6456	Rn.6456	chr2:203777717-203778349 (-) // 99.84 // q34	mitsugumin 29 (predicted)	Mg29_predicted	chr2q34	362018	NM_001108563 /// XM_001071432 /// XM_342316	---
1372527_at	NNN	0.134473	Rtn2	RTN2	BG380684	chr1q21	1372527_at	1575.15	905.46	1394.63	599.314	287.341	187.997	22.0646	164.973	137.24	12.9724	5.72434	Rn.3210.1	gb:BG380684 /DB_XREF=gi:13305156 /DB_XREF=UI-R-CT0-bua-c-03-0-UI.s1 /CLONE=UI-R-CT0-bua-c-03-0-UI /FEA=EST /CNT=14 /TID=Rn.3210.1 /TIER=Stack /STK=11 /UG=Rn.3210 /UG_TITLE=ESTs, Weakly similar to RTN1_RAT RETICULON 1 (NEUROENDOCRINE-SPECIFIC PROTEIN) (S-REX) (R.norvegicus)	BG380684	Rn.3210	Rn.3210	chr1:78658751-78660380 (+) // 99.07 // q21	reticulon 2 (Z-band associated protein)	Rtn2	chr1q21	308410	NM_201562	---
1386911_at	NNN	0.134473	Atp1a2	ATP1A2	NM_012505	chr13q24-q26	1386911_at	8577.06	7661.55	6301.09	7433.38	3263.31	782.374	307.742	1425.7	1059.69	70.926	70.0658	Rn.1042.1	gb:NM_012505.1 /DB_XREF=gi:6978544 /GEN=Atp1a2 /FEA=FLmRNA /CNT=33 /TID=Rn.1042.1 /TIER=FL+Stack /STK=21 /UG=Rn.1042 /LL=24212 /DEF=Rattus norvegicus ATPase, Na+K+ transporting, alpha 2 polypeptide (Atp1a2), mRNA. /PROD=ATPase, Na+K+ transporting, alpha 2 polypeptide /FL=gb:M14512.1 gb:NM_012505.1	NM_012505	Rn.1042	Rn.1042	chr13:88258984-88283918 (-) // 97.5 // q24	ATPase, Na+/K+ transporting, alpha 2 polypeptide	Atp1a2	chr13q24-q26	24212	NM_012505	---
1372372_at	NNN	0.134335	RGD1306952	RGD1306952	BG372437	chr2q22	1372372_at	2543.29	2857.88	2746.7	700.524	205.509	30.1245	256.668	464.179	222.037	18.0281	8.38215	Rn.12364.1	gb:BG372437 /DB_XREF=gi:13268974 /DB_XREF=UI-R-CV1-bsc-g-03-0-UI.s1 /CLONE=UI-R-CV1-bsc-g-03-0-UI /FEA=EST /CNT=13 /TID=Rn.12364.1 /TIER=Stack /STK=12 /UG=Rn.12364 /UG_TITLE=ESTs	BG372437	Rn.12364	Rn.64439	chr2:83680505-83681122 (+) // 95.3 // q22	similar to Ab2-225	RGD1306952	chr2q22	310201	NM_001008770	---
1389171_at	NNN	0.134228	---	---	AI104326	---	1389171_at	3209.37	3691.08	3402.65	2100.64	830.78	410.962	148.503	415.835	445.86	206.042	149.355	Rn.22458.1	gb:AI104326 /DB_XREF=gi:3708698 /DB_XREF=EST213615 /CLONE=RHECA39 /FEA=EST /CNT=12 /TID=Rn.22458.1 /TIER=Stack /STK=8 /UG=Rn.22458 /UG_TITLE=ESTs	AI104326	---	---	chr16:17668987-17669705 (-) // 100.0 // p14	---	---	---	0	---	---
1368252_at	NNN	0.13312	Kbtbd10	KBTBD10	NM_057191	chr3q21	1368252_at	3957.74	3877.01	2601.26	2807.96	2066.34	540.901	115.956	524.281	449.345	26.0746	503.567	Rn.28875.1	gb:NM_057191.1 /DB_XREF=gi:17105343 /GEN=Sarcosin /FEA=FLmRNA /CNT=9 /TID=Rn.28875.1 /TIER=FL+Stack /STK=7 /UG=Rn.28875 /LL=117537 /DEF=Rattus norvegicus sarcomeric muscle protein (Sarcosin), mRNA. /PROD=sarcomeric muscle protein /FL=gb:NM_057191.1	NM_057191	Rn.28875	Rn.28875	chr3:51815966-51829142 (+) // 98.82 // q21	kelch repeat and BTB (POZ) domain containing 10	Kbtbd10	chr3q21	117537	NM_057191	---
1388718_at	NNN	0.132486	Tmod1	TMOD1	AI104913	chr5q22	1388718_at	2071.69	928.638	1088.39	969.71	636.308	111.079	61.9339	283.748	146.819	28.6677	58.1415	Rn.1646.2	gb:AI104913 /DB_XREF=gi:3705063 /DB_XREF=EST214202 /CLONE=RHECL17 /FEA=EST /CNT=14 /TID=Rn.1646.2 /TIER=Stack /STK=12 /UG=Rn.1646 /LL=25566 /UG_GENE=Tmod /UG_TITLE=E-Tropomodulin	AI104913	Rn.1646	Rn.1646	chr5:62668098-62668760 (+) // 99.85 // q22	tropomodulin 1	Tmod1	chr5q22	25566	NM_013044	Striated_muscle_contraction // GenMAPP
1371554_at	NNN	0.132055	LOC688173	LOC688173	AA799471	---	1371554_at	19096	12665.4	12186.3	18120.8	5115.18	1965.06	565.888	2534.89	2031.73	284.707	117.296	Rn.4012.1	gb:AA799471 /DB_XREF=gi:2862426 /DB_XREF=EST188968 /CLONE=RHEAB42 /FEA=EST /CNT=22 /TID=Rn.4012.1 /TIER=Stack /STK=20 /UG=Rn.4012 /UG_TITLE=ESTs, Highly similar to TELT MOUSE TELETHONIN (M.musculus)	AA799471	Rn.4012	---	---	similar to Telethonin (Titin cap protein)	LOC688173	---	688173	XM_001081394	---
1377563_at	NNN	0.131839	RGD1564924_predicted	RGD1564924_PREDICTED	BI295947	chr4q34	1377563_at	1168.15	1674.7	856.568	394.478	271.091	47.5889	101.08	158.498	153.214	116.142	49.2038	Rn.41322.1	gb:BI295947 /DB_XREF=gi:14959902 /DB_XREF=UI-R-DK0-cfc-f-04-0-UI.s1 /CLONE=UI-R-DK0-cfc-f-04-0-UI /FEA=EST /CNT=4 /TID=Rn.41322.1 /TIER=ConsEnd /STK=4 /UG=Rn.41322 /UG_TITLE=ESTs, Highly similar to TROPONIN C, SKELETAL MUSCLE (M.musculus)	BI295947	Rn.41322	Rn.91424	chr4:131959154-131959516 (-) // 100.0 // q34	similar to leiomodin 3 (fetal) (predicted)	RGD1564924_predicted	chr4q34	500267	XM_575617	---
1368272_at	NNN	0.130681	Got1	GOT1	D00252	chr1q54	1368272_at	2544.17	3892.34	4065.27	2451.26	1027.98	254.109	391.67	468.449	347.413	876.243	919.716	Rn.5819.1	gb:D00252.1 /DB_XREF=gi:220683 /FEA=FLmRNA /CNT=35 /TID=Rn.5819.1 /TIER=FL+Stack /STK=6 /UG=Rn.5819 /LL=24401 /UG_GENE=Got1 /DEF=Rattus norvegicus mRNA for cytosolic aspartate aminotransferase, complete cds. /PROD=cytosolic aspartate aminotransferase /FL=gb:NM_012571.1 gb:D00252.1 gb:J04171.1	D00252	Rn.5819	Rn.5819	chr1:247324267-247347555 (+) // 91.98 // q54	glutamate oxaloacetate transaminase 1	Got1	chr1q54	24401	NM_012571	Glycolysis_and_Gluconeogenesis // GenMAPP
1370397_at	NNN	0.130594	Cyp4a3	CYP4A3	M33936	chr5q36	1370397_at	165.475	135.137	124.469	20.8794	9.22847	5.00966	11.1051	20.8929	10.5481	38.8312	38.2098	Rn.33492.1	gb:M33936.1 /DB_XREF=gi:204989 /FEA=FLmRNA /CNT=8 /TID=Rn.33492.1 /TIER=FL /STK=5 /UG=Rn.33492 /UG_TITLE=Rat Cyp4a locus, encoding cytochrome P450 (IVA3) mRNA, complete cds /DEF=Rat Cyp4a locus, encoding cytochrome P450 (IVA3) mRNA, complete cds. /FL=gb:M33936.1	M33936	Rn.33492	Rn.33492	chr5:135876134-135893753 (-) // 97.81 // q36 /// chr5:135547800-135773002 (-) // 69.23 // q36	cytochrome P450, family 4, subfamily a, polypeptide 3	Cyp4a3	chr5q36	298423	NM_175760	---
1373188_at	NNN	0.130068	Scn4b	SCN4B	AI137995	chr8q22	1373188_at	2282.89	2778.7	1861.49	963.662	412.799	108.907	249.297	267.866	237.537	10.9694	63.0047	Rn.22230.1	gb:AI137995 /DB_XREF=gi:3638772 /DB_XREF=UI-R-C2p-oi-b-06-0-UI.s1 /CLONE=UI-R-C2p-oi-b-06-0-UI /FEA=EST /CNT=11 /TID=Rn.22230.1 /TIER=Stack /STK=9 /UG=Rn.22230 /UG_TITLE=ESTs	AI137995	Rn.22230	Rn.22230	chr8:48106237-48106737 (+) // 100.0 // q22	sodium channel, voltage-gated, type IV, beta	Scn4b	chr8q22	315611	NM_001008880	---
1369914_at	NNN	0.129371	Hrh2	HRH2	NM_012965	chr17p14	1369914_at	65.7826	11.6336	129.337	7.78491	9.95174	5.94126	5.22685	4.22344	7.84241	3.84113	13.1708	Rn.81207.1	gb:NM_012965.1 /DB_XREF=gi:6981043 /GEN=Hrh2 /FEA=FLmRNA /CNT=1 /TID=Rn.81207.1 /TIER=FL /STK=1 /UG=Rn.81207 /DEF=Rattus norvegicus Histamine H2 receptor (Hrh2), mRNA. /PROD=histamine H2 receptor /FL=gb:NM_012965.1	NM_012965	Rn.81207	Rn.138113	chr17:16497966-16499043 (-) // 99.81 // p14	histamine receptor H 2	Hrh2	chr17p14	25461	NM_012965	GPCRDB_Class_A_Rhodopsin-like // GenMAPP /// Monoamine_GPCRs // GenMAPP
1374056_at	NNN	0.128143	LOC681858 /// LOC690139	LOC681858 /// LOC690139	AI236229	chr17p13	1374056_at	2870.37	3235.54	2286.17	1427.85	810.032	272.193	96.5981	375.132	345.801	42.192	41.9642	Rn.15377.1	gb:AI236229 /DB_XREF=gi:4136175 /DB_XREF=EST232791 /CLONE=ROVDC94 /FEA=EST /CNT=9 /TID=Rn.15377.1 /TIER=Stack /STK=7 /UG=Rn.15377 /UG_TITLE=ESTs	AI236229	Rn.15377	Rn.199020	chr17:24217930-24218347 (-) // 88.29 // p13	similar to RNA binding motif protein 24	LOC681858 /// LOC690139	chr17p13	0	XM_001058730 /// XM_001073426	---
1371492_at	NNN	0.127519	Apobec2_predicted	APOBEC2_PREDICTED	BF285350	chr9q12	1371492_at	1804.04	2495.3	2254.59	1086.98	395.917	178.318	127.735	233.739	280.087	64.1603	54.925	Rn.8489.1	gb:BF285350 /DB_XREF=gi:11216420 /DB_XREF=EST449941 /CLONE=RGIFD94 /FEA=EST /CNT=26 /TID=Rn.8489.1 /TIER=Stack /STK=22 /UG=Rn.8489 /UG_TITLE=ESTs, Weakly similar to APOLIPOPROTEIN B MRNA EDITING PROTEIN (R.norvegicus)	BF285350	Rn.8489	Rn.163040	chr9:7947512-7961017 (+) // 99.92 // q12	apolipoprotein B editing complex 2 (predicted)	Apobec2_predicted	chr9q12	301226	NM_001106883 /// XM_001063358 /// XM_217334	---
1387898_at	NNN	0.126017	Hspb6	HSPB6	D29960	chr1q21	1387898_at	8162.33	9293.23	9973.48	5728.99	2358.52	657.739	632.77	1146.55	1143.5	256.192	321.087	Rn.3201.1	gb:D29960.1 /DB_XREF=gi:1753175 /FEA=FLmRNA /CNT=19 /TID=Rn.3201.1 /TIER=FL+Stack /STK=17 /UG=Rn.3201 /DEF=Rattus norvegicus mRNA for alphaB crystallin-related protein, complete cds. /PROD=alphaB crystallin-related protein /FL=gb:D29960.1	D29960	Rn.3201	Rn.3201	chr1:85599074-85601219 (+) // 100.0 // q21	heat shock protein, alpha-crystallin-related, B6	Hspb6	chr1q21	192245	NM_138887	---
1377271_at	NNN	0.121074	Unc45b_predicted	UNC45B_PREDICTED	BF390686	chr10q26	1377271_at	1211.99	863.713	718.5	585.908	355.998	91.5225	35.572	132.559	102.223	59.1054	17.2341	Rn.61093.1	gb:BF390686 /DB_XREF=gi:11375533 /DB_XREF=UI-R-CA1-bco-b-05-0-UI.s1 /CLONE=UI-R-CA1-bco-b-05-0-UI /FEA=EST /CNT=4 /TID=Rn.61093.1 /TIER=ConsEnd /STK=4 /UG=Rn.61093 /UG_TITLE=ESTs	BF390686	Rn.61093	Rn.61093	chr10:71155664-71156225 (+) // 100.0 // q26	unc-45 homolog B (C. elegans) (predicted)	Unc45b_predicted	chr10q26	303373	NM_001107028 /// XM_001081034 /// XM_220771	---
1374352_at	NNN	0.120034	Actc1	ACTC1	AI711147	chr3q35	1374352_at	2549.25	1191.37	1126.4	876.692	246.786	171.314	72.3341	153.52	178.084	24.3842	64.4963	Rn.3114.2	gb:AI711147 /DB_XREF=gi:5000923 /DB_XREF=UI-R-AD1-zo-f-12-0-UI.s1 /CLONE=UI-R-AD1-zo-f-12-0-UI /FEA=EST /CNT=7 /TID=Rn.3114.2 /TIER=Stack /STK=7 /UG=Rn.3114 /LL=29275 /UG_GENE=Actc1 /UG_TITLE=Actin, alpha, cardiac	AI711147	Rn.3114	Rn.3114	chr3:99901025-99903364 (-) // 96.51 // q35	actin alpha cardiac 1	Actc1	chr3q35	29275	NM_019183	---
1373920_at	NNN	0.118858	---	---	AI175534	---	1373920_at	2127.7	2262.98	2834.94	774.054	459.969	209.898	116.362	261.002	217.132	48.3481	12.2385	Rn.17151.1	gb:AI175534 /DB_XREF=gi:3726172 /DB_XREF=EST219088 /CLONE=RMUCO68 /FEA=EST /CNT=11 /TID=Rn.17151.1 /TIER=Stack /STK=7 /UG=Rn.17151 /UG_TITLE=ESTs	AI175534	Rn.17151	Rn.203224	chr8:126460527-126461214 (+) // 99.71 // q32	Transcribed locus	---	---	0	---	---
1370971_at	NNN	0.113714	Myh1 /// Myh2	MYH1 /// MYH2	BI277545	chr10q24	1370971_at	20371.9	24322.4	21967.5	10645.4	7485.68	2286.51	128.572	3203.21	2095.43	2.49772	37.0116	Rn.40497.1	gb:BI277545 /DB_XREF=gi:14923522 /DB_XREF=UI-R-CY0-bxs-e-02-0-UI.s1 /CLONE=UI-R-CY0-bxs-e-02-0-UI /FEA=mRNA /CNT=6 /TID=Rn.40497.1 /TIER=ConsEnd /STK=4 /UG=Rn.40497 /UG_TITLE=Rattus norvegicus type 2X myosin heavy chain (MYHC) mRNA, partial cds	BI277545	Rn.40497	Rn.10092	chr10:53914696-53917948 (+) // 100.0 // q24	myosin, heavy polypeptide 1, skeletal muscle, adult /// myosin, heavy polypeptide 2, skeletal muscle, adult	Myh1 /// Myh2	chr10q24	0	XM_001077462 /// XM_001077478 /// XM_001077494 /// XM_001077511 /// XM_001077532 /// XM_001077547 /// XM_001077568 /// XM_001077587 /// XM_001077603 /// XM_001077982 /// XM_001078018	---
1377448_at	NNN	0.113065	Tmem38a_predicted	TMEM38A_PREDICTED	BG374556	chr16p14	1377448_at	483.974	225.017	311.629	247.81	36.8548	17.4148	17.3258	25.2333	58.0917	76.1978	20.0199	Rn.66154.1	gb:BG374556 /DB_XREF=gi:13299068 /DB_XREF=UI-R-CV1-bta-c-02-0-UI.s1 /CLONE=UI-R-CV1-bta-c-02-0-UI /FEA=EST /CNT=4 /TID=Rn.66154.1 /TIER=ConsEnd /STK=4 /UG=Rn.66154 /UG_TITLE=ESTs	BG374556	Rn.66154	Rn.162265	chr16:17669831-17670270 (-) // 84.05 // p14	transmembrane protein 38a (predicted)	Tmem38a_predicted	chr16p14	306327	NM_001100175 /// XM_001063213 /// XM_224706	---
1374248_at	NNN	0.112998	Mybpc1	MYBPC1	BM389619	chr7q13	1374248_at	11640.7	8968.06	7828.32	6460.13	2922.51	992.372	315.646	1274.53	836.301	9.22776	4.66201	Rn.9153.1	gb:BM389619 /DB_XREF=gi:18189672 /DB_XREF=UI-R-CN1-cjo-e-09-0-UI.s1 /CLONE=UI-R-CN1-cjo-e-09-0-UI /FEA=EST /CNT=7 /TID=Rn.9153.1 /TIER=Stack /STK=7 /UG=Rn.9153 /UG_TITLE=ESTs, Weakly similar to norvegicus myosin binding protein H (Rattus norvegicus) (R.norvegicus)	BM389619	Rn.9153	Rn.9153	chr7:25213497-25221017 (-) // 94.43 // q13	myosin binding protein C, slow type	Mybpc1	chr7q13	362867	XM_001076591 /// XM_343196	Striated_muscle_contraction // GenMAPP
1368108_at	NNN	0.1119	Atp2a1	ATP2A1	NM_058213	---	1368108_at	27248.5	17468.6	27632	17461.9	5732.78	1296.54	686.723	3602.53	2967.3	227.894	55.0071	Rn.10833.1	gb:NM_058213.1 /DB_XREF=gi:17157986 /GEN=Atp2a1 /FEA=FLmRNA /CNT=13 /TID=Rn.10833.1 /TIER=FL+Stack /STK=9 /UG=Rn.10833 /LL=116601 /DEF=Rattus norvegicus ATPase, Ca++ transporting, cardiac muscle, fast twitch 1 (Atp2a1), mRNA. /PROD=ATPase, Ca++ transporting, cardiac muscle, fasttwitch 1 /FL=gb:NM_058213.1	NM_058213	Rn.10833	Rn.218029	---	ATPase, Ca++ transporting, cardiac muscle, fast twitch 1	Atp2a1	---	116601	NM_058213	---
1374698_at	NNN	0.111172	LOC687508	LOC687508	AI709531	---	1374698_at	959.173	1402.41	1182.81	706.373	231.386	69.9943	117.404	71.5911	139.644	72.4732	76.2044	Rn.13635.1	gb:AI709531 /DB_XREF=gi:4999307 /DB_XREF=UI-R-C3-tn-d-05-0-UI.s1 /CLONE=UI-R-C3-tn-d-05-0-UI /FEA=EST /CNT=8 /TID=Rn.13635.1 /TIER=Stack /STK=6 /UG=Rn.13635 /UG_TITLE=ESTs, Weakly similar to COXJ RAT CYTOCHROME C OXIDASE POLYPEPTIDE VIIA-LIVERHEART, MITOCHONDRIAL PRECURSOR (R.norvegicus)	AI709531	Rn.13635	---	---	similar to Cytochrome c oxidase polypeptide VIIa-heart, mitochondrial precursor (Cytochrome c oxidase subunit VIIa-H) (COX VIIa-M)	LOC687508	---	687508	XM_001075606 /// XM_001075627	---
1389462_at	NNN	0.110793	---	---	BG373049	---	1389462_at	462.173	693.849	485.686	234.98	81.2892	84.2653	10.9593	38.3958	39.9237	14.065	35.5845	Rn.41650.1	gb:BG373049 /DB_XREF=gi:13269586 /DB_XREF=UI-R-CV1-bsb-h-09-0-UI.s1 /CLONE=UI-R-CV1-bsb-h-09-0-UI /FEA=EST /CNT=8 /TID=Rn.41650.1 /TIER=Stack /STK=7 /UG=Rn.41650 /UG_TITLE=ESTs	BG373049	Rn.41650	Rn.41650	chr2:235599135-235599970 (+) // 96.89 // q44	Transcribed locus	---	---	0	---	---
1387768_at	NNN	0.110522	Mb	MB	NM_021588	chr7q34	1387768_at	27478.5	29312.8	33502.1	23492.5	14481	1788.87	607.667	5566.59	3377.94	126.588	3.31131	Rn.40511.1	gb:NM_021588.1 /DB_XREF=gi:11024649 /GEN=Mb /FEA=FLmRNA /CNT=61 /TID=Rn.40511.1 /TIER=FL+Stack /STK=54 /UG=Rn.40511 /LL=59108 /DEF=Rattus norvegicus myoglobin (Mb), mRNA. /PROD=myoglobin /FL=gb:AF197916.1 gb:NM_021588.1	NM_021588	Rn.40511	Rn.40511	chr7:115087558-115094762 (-) // 97.87 // q34	myoglobin	Mb	chr7q34	59108	NM_021588	---
1388604_at	NNN	0.105872	LOC679341 /// LOC686019	LOC679341 /// LOC686019	BI276959	chr13q24	1388604_at	4207.54	4578.99	3768.97	2034.34	1358.91	307.825	155.253	403.168	484.572	14.1217	278.121	Rn.38090.1	gb:BI276959 /DB_XREF=gi:14922372 /DB_XREF=UI-R-CW0-bxo-e-02-0-UI.s1 /CLONE=UI-R-CW0-bxo-e-02-0-UI /FEA=EST /CNT=14 /TID=Rn.38090.1 /TIER=Stack /STK=14 /UG=Rn.38090 /UG_TITLE=ESTs, Moderately similar to CAQC RAT CALSEQUESTRIN, CARDIAC MUSCLE ISOFORM PRECURSOR (R.norvegicus)	BI276959	Rn.38090	Rn.159963	chr13:88200505-88201132 (-) // 90.52 // q24	similar to Calsequestrin-1 precursor (Calsequestrin, skeletal muscle isoform)	LOC679341 /// LOC686019	chr13q24	0	XM_001057529 /// XM_001063867	---
1373873_at	NNN	0.105846	---	---	AI175346	---	1373873_at	2340.03	1446.95	1238.69	904.962	404.767	83.9739	115.123	171.963	165.403	78.1046	34.2346	Rn.14050.1	gb:AI175346 /DB_XREF=gi:3725984 /DB_XREF=EST218887 /CLONE=RMUCM36 /FEA=EST /CNT=13 /TID=Rn.14050.1 /TIER=Stack /STK=7 /UG=Rn.14050 /UG_TITLE=ESTs	AI175346	Rn.14050	Rn.14050	chr17:38107370-38108389 (+) // 87.14 // p12	Transcribed locus	---	---	0	---	---
1385111_at	NNN	0.103728	---	---	AA874842	---	1385111_at	81.2981	35.984	41.0119	39.8047	39.5386	4.78877	6.15794	4.9688	3.8042	9.65972	5.18897	Rn.3141.1	gb:AA874842 /DB_XREF=gi:4230725 /DB_XREF=UI-R-E0-cg-g-08-0-UI.s1 /CLONE=UI-R-E0-cg-g-08-0-UI /FEA=EST /CNT=1 /TID=Rn.3141.1 /TIER=ConsEnd /STK=1 /UG=Rn.3141 /UG_TITLE=EST	AA874842	Rn.3141	Rn.203075	chr1:190974296-190974767 (-) // 61.15 // q41	Transcribed locus	---	---	0	---	---
1372536_at	NNN	0.103594	Cabc1	CABC1	AI105042	chr13q26	1372536_at	8169.06	9641.59	7320.81	5516.52	1967.55	512.832	373.383	882.422	934.384	137.696	37.9333	Rn.40456.1	gb:AI105042 /DB_XREF=gi:4134317 /DB_XREF=EST214331 /CLONE=RHECM87 /FEA=EST /CNT=14 /TID=Rn.40456.1 /TIER=Stack /STK=11 /UG=Rn.40456 /UG_TITLE=ESTs, Weakly similar to YLC4_CAEEL HYPOTHETICAL 81.0 KD PROTEIN C35D10.4 IN CHROMOSOME III (C.elegans)	AI105042	Rn.40456	Rn.160865	chr13:95869323-95869761 (-) // 90.41 // q26	chaperone, ABC1 activity of bc1 complex like (S. pombe)	Cabc1	chr13q26	360887	NM_001013185	---
1373648_at	NNN	0.103262	LOC681849	LOC681849	AI102627	---	1373648_at	2625.16	2625.79	1782.39	1437.46	464.426	179.346	62.8592	291.994	203.939	5.33889	11.5452	Rn.28176.1	gb:AI102627 /DB_XREF=gi:3707348 /DB_XREF=EST211916 /CLONE=REMBQ22 /FEA=EST /CNT=9 /TID=Rn.28176.1 /TIER=Stack /STK=8 /UG=Rn.28176 /UG_TITLE=ESTs, Highly similar to T42372 probable guanylate kinase (M.musculus)	AI102627	Rn.28176	Rn.28176	---	similar to Protein C6orf142 homolog	LOC681849	---	681849	XM_001058694	---
1375518_at	NNN	0.101672	Ttn	TTN	AI104533	chr3q23	1375518_at	14988.9	11828.8	7724.76	8568.57	4383.31	1386.15	254.479	1148.8	1073.64	63.2471	80.9219	Rn.4008.1	gb:AI104533 /DB_XREF=gi:3708874 /DB_XREF=EST213822 /CLONE=RHECE72 /FEA=EST /CNT=32 /TID=Rn.4008.1 /TIER=Stack /STK=7 /UG=Rn.4008 /UG_TITLE=ESTs, Moderately similar to S63665 titin protein (H.sapiens)	AI104533	Rn.4008	---	chr3:59404459-59405326 (-) // 95.59 // q23	titin	Ttn	chr3q23	84015	XM_001065955 /// XM_575155	Striated_muscle_contraction // GenMAPP /// Striated_muscle_contraction // GenMAPP /// Striated_muscle_contraction // GenMAPP /// Striated_muscle_contraction // GenMAPP /// Striated_muscle_contraction // GenMAPP /// Striated_muscle_contraction // GenMAPP
1373684_at	NNN	0.101392	RGD1560540_predicted	RGD1560540_PREDICTED	AA818643	chr8q31	1373684_at	1436.19	1967.26	1811.3	560.171	310.197	78.1917	85.3981	143.394	186.604	13.0191	12.9669	Rn.1412.1	gb:AA818643 /DB_XREF=gi:4200454 /DB_XREF=UI-R-A0-az-f-04-0-UI.s1 /CLONE=UI-R-A0-az-f-04-0-UI /FEA=EST /CNT=9 /TID=Rn.1412.1 /TIER=Stack /STK=8 /UG=Rn.1412 /UG_TITLE=ESTs	AA818643	Rn.1412	Rn.123387	chr8:82632485-82633447 (+) // 99.59 // q31	similar to hypothetical protein D930047P17 (predicted)	RGD1560540_predicted	chr8q31	315833	NM_001108170 /// XM_001058807 /// XM_236428	---
1386160_at	NNN	0.100048	Thh_predicted	THH_PREDICTED	AI639401	chr2q34	1386160_at	4886.85	8084.68	5541.77	2820	3395.28	120.7	180.622	791.379	886.541	2.62718	31.0946	Rn.42981.1	gb:AI639401 /DB_XREF=gi:4700435 /DB_XREF=rx00654s /CLONE=rx00654 /FEA=EST /CNT=1 /TID=Rn.42981.1 /TIER=ConsEnd /STK=1 /UG=Rn.42981 /UG_TITLE=ESTs, Weakly similar to A45973 trichohyalin (H.sapiens)	AI639401	Rn.42981	Rn.42981	chr2:186534355-186534905 (+) // 100.0 // q34	Trichohyalin (predicted)	Thh_predicted	chr2q34	310588	XM_001054694 /// XM_227373	---
1370439_a_at	NNN	0.0992806	Kcnc2	KCNC2	M34052	chr7q12-q22	1370439_a_at	59.9284	11.7419	93.9581	34.9242	11.0577	5.10802	3.67518	4.96424	3.05959	1.96285	2.68178	Rn.9733.1	gb:M34052.1 /DB_XREF=gi:206913 /GEN=KShIIIa /FEA=FLmRNA /CNT=4 /TID=Rn.9733.1 /TIER=FL /STK=3 /UG=Rn.9733 /DEF=Rat K+ channel protein (KShIIIA) mRNA, complete cds. /PROD=K+ channel protein /FL=gb:M34052.1	M34052	Rn.9733	Rn.9733	chr7:51326601-51487969 (+) // 99.12 // q21	potassium voltage gated channel, Shaw-related subfamily, member 2	Kcnc2	chr7q12-q22	246153	NM_139216 /// NM_139217	---
1375092_at	NNN	0.0988418	---	---	AW252664	---	1375092_at	449.151	505.975	749.759	379.915	270.614	11.3641	14.9842	46.7808	113.122	15.9767	11.1738	Rn.20687.1	gb:AW252664 /DB_XREF=gi:6596255 /DB_XREF=UI-R-BJ0-aeb-b-08-0-UI.s1 /CLONE=UI-R-BJ0-aeb-b-08-0-UI /FEA=EST /CNT=6 /TID=Rn.20687.1 /TIER=Stack /STK=6 /UG=Rn.20687 /UG_TITLE=ESTs	AW252664	Rn.20687	Rn.20687	chr19:14667701-14667972 (-) // 77.12 // p11	Transcribed locus, moderately similar to XP_995266.1 PREDICTED: similar to Myosin-18B (Myosin XVIIIb) [Mus musculus]	---	---	0	---	---
1367626_at	NNN	0.0977328	Ckm	CKM	NM_012530	chr1q21	1367626_at	24546.2	24503.3	32907.3	21977.1	6537.27	1952.57	598.964	3884.05	2201.74	73.8723	96.6834	Rn.10756.1	gb:NM_012530.1 /DB_XREF=gi:6978660 /GEN=Ckm /FEA=FLmRNA /CNT=40 /TID=Rn.10756.1 /TIER=FL+Stack /STK=34 /UG=Rn.10756 /LL=24265 /DEF=Rattus norvegicus Creatine kinase, muscle form (Ckm), mRNA. /PROD=creatine kinase, muscle form /FL=gb:M10140.1 gb:NM_012530.1	NM_012530	Rn.10756	Rn.10756	chr1:78762201-78772682 (+) // 97.44 // q21	creatine kinase, muscle	Ckm	chr1q21	24265	NM_012530	---
1371000_at	NNN	0.0975075	Cacna1s	CACNA1S	AI454679	---	1371000_at	642.492	1029.64	798.467	433.143	254.311	15.6412	24.014	103.598	103.094	19.0587	13.6265	Rn.10738.1	gb:AI454679 /DB_XREF=gi:4295411 /DB_XREF=UI-R-BT0-qk-c-05-0-UI.s1 /CLONE=UI-R-BT0-qk-c-05-0-UI /FEA=mRNA /CNT=3 /TID=Rn.10738.1 /TIER=ConsEnd /STK=2 /UG=Rn.10738 /LL=116652 /UG_GENE=Cacna1s /UG_TITLE=calcium channel, voltage-dependent, L type, alpha 1S subunit	AI454679	Rn.10738	Rn.10738	---	calcium channel, voltage-dependent, L type, alpha 1S subunit	Cacna1s	---	116652	---	Calcium_regulation_in_cardiac_cells // GenMAPP
1388741_at	NNN	0.0974907	LOC688915	LOC688915	AW533234	chr2q12	1388741_at	3425.25	3371.28	3320.78	1341.79	762.118	394.878	27.3071	277.212	253.767	8.85602	7.67526	Rn.7810.1	gb:AW533234 /DB_XREF=gi:7175648 /DB_XREF=UI-R-BU0-ana-d-09-0-UI.s1 /CLONE=UI-R-BU0-ana-d-09-0-UI /FEA=EST /CNT=12 /TID=Rn.7810.1 /TIER=Stack /STK=12 /UG=Rn.7810 /UG_TITLE=ESTs	AW533234	Rn.7810	Rn.7810	chr2:23318506-23319028 (-) // 99.81 // q12	similar to cardiomyopathy associated 5	LOC688915	chr2q12	688915	XM_001068814	---
1372407_at	NNN	0.0969098	Tmod4_predicted	TMOD4_PREDICTED	BI289527	chr2q34	1372407_at	5481.4	7137.06	6114.41	3083.93	1213	472.745	248.846	532.824	531.036	163.241	146.526	Rn.22474.1	gb:BI289527 /DB_XREF=gi:14947191 /DB_XREF=UI-R-DK0-cff-b-04-0-UI.s1 /CLONE=UI-R-DK0-cff-b-04-0-UI /FEA=EST /CNT=13 /TID=Rn.22474.1 /TIER=Stack /STK=12 /UG=Rn.22474 /UG_TITLE=ESTs, Weakly similar to TMOD MOUSE TROPOMODULIN (M.musculus)	BI289527	Rn.22474	Rn.22474	chr2:190031920-190034754 (+) // 100.0 // q34	tropomodulin 4 (predicted)	Tmod4_predicted	chr2q34	295261	NM_001106449 /// XM_001054854 /// XM_215641	---
1374088_at	NNN	0.0959261	Mypn_predicted	MYPN_PREDICTED	AA800249	chr20p11	1374088_at	2189.43	1443.56	1220.26	782.809	458.928	117.203	59.7076	184.591	106.233	9.69274	4.16328	Rn.3872.1	gb:AA800249 /DB_XREF=gi:2863204 /DB_XREF=EST189746 /CLONE=RHEAM93 /FEA=EST /CNT=9 /TID=Rn.3872.1 /TIER=Stack /STK=7 /UG=Rn.3872 /UG_TITLE=ESTs, Weakly similar to T08742 hypothetical protein DKFZp586L0518.1 (H.sapiens)	AA800249	Rn.3872	Rn.3872	chr20:25457127-25457915 (-) // 97.47 // p11	myopalladin (predicted)	Mypn_predicted	chr20p11	309760	NM_001107628 /// XM_001080508 /// XM_228149	---
1387398_at	NNN	0.0956336	Pkia	PKIA	AA996685	chr2q23	1387398_at	684.827	779.146	803.632	261.928	260.848	113.986	7.54778	74.7413	17.2082	14.4625	5.26913	Rn.37613.1	gb:AA996685 /DB_XREF=gi:4280451 /DB_XREF=UI-R-C0-hf-f-08-0-UI.s1 /CLONE=UI-R-C0-hf-f-08-0-UI /FEA=FLmRNA /CNT=10 /TID=Rn.37613.1 /TIER=ConsEnd /STK=1 /UG=Rn.37613 /LL=114906 /UG_GENE=Pkia /UG_TITLE=protein kinase inhibitor, alpha /FL=gb:L02615.1 gb:NM_053772.1	AA996685	Rn.37613	Rn.94808	chr2:96522025-96548144 (-) // 99.15 // q23	protein kinase inhibitor, alpha	Pkia	chr2q23	114906	NM_053772	---
1367989_at	NNN	0.0949544	Slc2a4	SLC2A4	NM_012751	chr10q24	1367989_at	2412.69	3386.48	2697.8	1886.49	642.452	158.756	82.7427	372.131	223.936	13.0658	32.178	Rn.1314.1	gb:NM_012751.1 /DB_XREF=gi:6980957 /GEN=Glut4 /FEA=FLmRNA /CNT=15 /TID=Rn.1314.1 /TIER=FL+Stack /STK=11 /UG=Rn.1314 /LL=25139 /DEF=Rattus norvegicus solute carrier family 2 (facilitated glucose transporter), member 4 (Glut4), mRNA. /PROD=solute carrier family 2 (facilitated glucosetransporter), member 4 /FL=gb:M25482.1 gb:J04524.1 gb:NM_012751.1	NM_012751	Rn.1314	Rn.1314	chr10:56786704-56792224 (-) // 99.96 // q24	solute carrier family 2 (facilitated glucose transporter), member 4	Slc2a4	chr10q24	25139	NM_012751	---
1374677_at	NNN	0.0929927	LOC684425	LOC684425	AI577508	---	1374677_at	5856.18	6905.58	6177.99	3013.81	975.562	266.572	152.854	728.928	557.439	130.754	14.5135	Rn.19158.1	gb:AI577508 /DB_XREF=gi:4561884 /DB_XREF=UI-R-Y0-vj-f-06-0-UI.s1 /CLONE=UI-R-Y0-vj-f-06-0-UI /FEA=EST /CNT=8 /TID=Rn.19158.1 /TIER=Stack /STK=6 /UG=Rn.19158 /UG_TITLE=ESTs, Highly similar to 2122208A adenylosuccinate synthetase:ISOTYPE=muscle (M.musculus)	AI577508	Rn.19158	---	---	similar to Adenylosuccinate synthetase isozyme 1 (Adenylosuccinate synthetase, muscle isozyme) (IMP--aspartate ligase 1) (AdSS 1) (AMPSase 1)	LOC684425	---	684425	XM_001072835 /// XM_001072867	---
1373130_at	NNN	0.0927567	---	---	AI407239	---	1373130_at	2838.66	1898.25	2432.45	1855.57	684.339	145.276	68.8066	210.991	295.406	49.375	103.705	Rn.33916.1	gb:AI407239 /DB_XREF=gi:4250743 /DB_XREF=EST235527 /CLONE=ROVDX29 /FEA=EST /CNT=12 /TID=Rn.33916.1 /TIER=Stack /STK=9 /UG=Rn.33916 /UG_TITLE=ESTs, Moderately similar to S43529 165K protein, skeletal muscle (H.sapiens)	AI407239	Rn.33916	Rn.33916	chr16:79329899-79330390 (-) // 100.0 // q12.5	Transcribed locus	---	---	0	---	---
1373790_at	NNN	0.0881982	---	---	AI045400	---	1373790_at	809.43	541.939	273.234	309.515	108.211	24.9294	47.908	30.2631	41.0033	156.848	12.1704	Rn.9408.1	gb:AI045400 /DB_XREF=gi:3292219 /DB_XREF=UI-R-C1-kg-b-11-0-UI.s1 /CLONE=UI-R-C1-kg-b-11-0-UI /FEA=EST /CNT=8 /TID=Rn.9408.1 /TIER=Stack /STK=8 /UG=Rn.9408 /UG_TITLE=ESTs	AI045400	---	---	chr2:190683513-190683905 (-) // 95.61 // q34	---	---	---	0	---	---
1372190_at	NNN	0.0878905	Aqp4	AQP4	AI235942	chr18p13	1372190_at	234.337	145.24	186.542	7.32819	52.1828	2.68936	4.23239	9.01884	28.0489	3.15804	25.8121	Rn.36859.1	gb:AI235942 /DB_XREF=gi:3829448 /DB_XREF=EST232504 /CLONE=ROVCY91 /FEA=EST /CNT=14 /TID=Rn.36859.1 /TIER=Stack /STK=13 /UG=Rn.36859 /UG_TITLE=ESTs	AI235942	Rn.36859	Rn.90091	chr18:6626232-6626863 (-) // 94.45 // p13	aquaporin 4	Aqp4	chr18p13	25293	NM_012825	---
1374895_at	NNN	0.0870267	Myom1	MYOM1	BM384739	chr9q38	1374895_at	2491.17	2234.99	1852.31	1363.55	497.464	218.386	25.3605	206.48	137.341	77.99	20.8021	Rn.15504.1	gb:BM384739 /DB_XREF=gi:18184792 /DB_XREF=UI-R-CN1-cjl-j-17-0-UI.s2 /CLONE=UI-R-CN1-cjl-j-17-0-UI /FEA=EST /CNT=8 /TID=Rn.15504.1 /TIER=Stack /STK=6 /UG=Rn.15504 /UG_TITLE=ESTs, Highly similar to SKLM MOUSE SKELEMIN (M.musculus)	BM384739	Rn.15504	Rn.15504	chr9:110336889-110341027 (+) // 99.16 // q38	myomesin 1 (skelemin) 185kDa	Myom1	chr9q38	316740	XM_001054913 /// XM_001054975 /// XM_001055036 /// XM_001055089 /// XM_001065463 /// XM_237523	Striated_muscle_contraction // GenMAPP /// Striated_muscle_contraction // GenMAPP
1389630_at	NNN	0.0860197	---	---	AI168941	---	1389630_at	1843.32	1922.61	1774.98	995.181	242.792	123.463	116.205	125.529	101.297	85.3906	113.299	Rn.18224.1	gb:AI168941 /DB_XREF=gi:3705249 /DB_XREF=EST214769 /CLONE=RKIBK96 /FEA=EST /CNT=8 /TID=Rn.18224.1 /TIER=Stack /STK=6 /UG=Rn.18224 /UG_TITLE=ESTs	AI168941	---	---	chr12:45244442-45245761 (+) // 98.67 // q16	---	---	---	0	---	---
1373755_at	NNN	0.0792168	LOC691307	LOC691307	AI717543	chr2q41	1373755_at	1110.57	1418.83	870.676	490.643	233.793	34.1741	48.2219	54.4564	124.532	18.6205	40.0581	Rn.35825.1	gb:AI717543 /DB_XREF=gi:5034799 /DB_XREF=UI-R-Y0-acp-e-06-0-UI.s1 /CLONE=UI-R-Y0-acp-e-06-0-UI /FEA=EST /CNT=8 /TID=Rn.35825.1 /TIER=Stack /STK=8 /UG=Rn.35825 /UG_TITLE=ESTs, Weakly similar to densin-180 (Rattus norvegicus) (R.norvegicus)	AI717543	Rn.35825	Rn.79735	chr2:212808265-212813031 (+) // 92.64 // q41	similar to leucine rich repeat containing 39 isoform 2	LOC691307	chr2q41	691307	NM_001109637 /// XM_001073285 /// XM_001077333	---
1373276_at	NNN	0.0786941	RGD1562234_predicted	RGD1562234_PREDICTED	BM390162	chr2q34	1373276_at	3471.75	8985.75	5158.11	2177.26	2594.51	8.06202	12.9209	1081.26	307.157	3.51691	8.11295	Rn.973.2	gb:BM390162 /DB_XREF=gi:18190215 /DB_XREF=UI-R-CN1-cjp-l-22-0-UI.s1 /CLONE=UI-R-CN1-cjp-l-22-0-UI /FEA=EST /CNT=10 /TID=Rn.973.2 /TIER=Stack /STK=9 /UG=Rn.973 /UG_TITLE=ESTs, Highly similar to 60S ACIDIC RIBOSOMAL PROTEIN P1 (R.norvegicus)	BM390162	Rn.973	Rn.94762	chr2:183501767-183502086 (+) // 100.0 // q34	similar to S100 calcium-binding protein, ventral prostate (predicted)	RGD1562234_predicted	chr2q34	499657	NM_001109187 /// XM_001058191 /// XM_574981	---
1374391_at	NNN	0.078369	Sln	SLN	BF408611	chr8q24	1374391_at	17254.9	23018.4	23919	14303.2	5573.99	1554.99	86.5888	1854.27	1774.9	72.226	24.7108	Rn.16457.1	gb:BF408611 /DB_XREF=gi:11396586 /DB_XREF=UI-R-BJ2-brf-g-09-0-UI.s1 /CLONE=UI-R-BJ2-brf-g-09-0-UI /FEA=EST /CNT=23 /TID=Rn.16457.1 /TIER=Stack /STK=6 /UG=Rn.16457 /UG_TITLE=ESTs, Moderately similar to SARL_HUMAN SARCOLIPIN (H.sapiens)	BF408611	Rn.16457	Rn.16457	chr8:57318509-57319031 (+) // 96.12 // q24	sarcolipin	Sln	chr8q24	367086	NM_001013247	---
1367660_at	NNN	0.0755402	Fabp3	FABP3	NM_024162	---	1367660_at	8083.47	12001.2	9224.47	4738.84	4422.05	390.561	390.814	734.551	808.903	115.801	64.4352	Rn.32566.1	gb:NM_024162.1 /DB_XREF=gi:13162362 /GEN=Fabp3 /FEA=FLmRNA /CNT=32 /TID=Rn.32566.1 /TIER=FL+Stack /STK=28 /UG=Rn.32566 /LL=79131 /DEF=Rattus norvegicus Fatty acid binding protein 3, muscle and heart (Fabp3), mRNA. /PROD=heart fatty acid binding protein /FL=gb:NM_024162.1 gb:M18034.1 gb:J02773.1	NM_024162	Rn.32566	Rn.32566	chr5:149340539-149347270 (+) // 92.89 // q36	fatty acid binding protein 3	Fabp3	---	79131	NM_024162	---
1376227_at	NNN	0.0754934	RGD1561064_predicted	RGD1561064_PREDICTED	AI716887	chr15p16	1376227_at	16859.2	11997.9	13227.6	9163.57	2730.71	534.514	361.832	1095.48	1268.22	178.559	61.4807	Rn.41395.1	gb:AI716887 /DB_XREF=gi:5034143 /DB_XREF=UI-R-Y0-aci-d-02-0-UI.s1 /CLONE=UI-R-Y0-aci-d-02-0-UI /FEA=EST /CNT=6 /TID=Rn.41395.1 /TIER=ConsEnd /STK=5 /UG=Rn.41395 /UG_TITLE=ESTs	AI716887	Rn.41395	Rn.128550	chr15:3876555-3877020 (+) // 99.57 // p16	similar to myozenin 1 (predicted)	RGD1561064_predicted	chr15p16	498440	NM_001109097 /// XM_001064588 /// XM_573691	---
1368013_at	NNN	0.0745822	Ddit4l	DDIT4L	NM_080399	chr2q44	1368013_at	2104.42	3923.28	2892.63	1608.66	655.669	125.317	119.627	184.657	237.74	144.608	15.0444	Rn.19672.1	gb:NM_080399.1 /DB_XREF=gi:17939351 /GEN=Smhs1 /FEA=FLmRNA /CNT=12 /TID=Rn.19672.1 /TIER=FL+Stack /STK=11 /UG=Rn.19672 /LL=140582 /DEF=Rattus norvegicus Smhs1 protein (Smhs1), mRNA. /PROD=Smhs1 protein /FL=gb:NM_080399.1 gb:AF327511.1	NM_080399	Rn.19672	Rn.19672	chr2:235130759-235133411 (+) // 65.04 // q44	DNA-damage-inducible transcript 4-like	Ddit4l	chr2q44	140582	NM_080399	---
1370165_at	NNN	0.0743685	Smpx	SMPX	AI406565	chrXq21	1370165_at	10732.1	12442.5	8584.06	7082.14	2900.94	421.549	115.047	1073.94	872.884	65.9934	31.8926	Rn.4123.1	gb:AI406565 /DB_XREF=gi:4250069 /DB_XREF=EST234851 /CLONE=RKIDZ15 /FEA=FLmRNA /CNT=37 /TID=Rn.4123.1 /TIER=Stack /STK=15 /UG=Rn.4123 /LL=84416 /UG_GENE=Smpx /UG_TITLE=small muscle protein, X-linked /FL=gb:AF364071.1 gb:NM_053395.1	AI406565	Rn.4123	Rn.4123	chrX:58520938-58581070 (-) // 100.0 // q21	small muscle protein, X-linked	Smpx	chrXq21	84416	NM_053395	---
1370214_at	NNN	0.0739607	Pvalb	PVALB	AI175539	chr7q34	1370214_at	2432.43	1261.55	1097.15	1534.62	1482.74	69.7961	65.2835	176.414	150.524	6.26606	3.11893	Rn.2005.1	gb:AI175539 /DB_XREF=gi:3726177 /DB_XREF=EST219094 /CLONE=RMUCO74 /FEA=FLmRNA /CNT=38 /TID=Rn.2005.1 /TIER=Stack /STK=12 /UG=Rn.2005 /LL=25269 /UG_GENE=Pvalb /UG_TITLE=Parvalbumin (calcium binding protein) /FL=gb:NM_022499.1	AI175539	Rn.2005	Rn.2005	chr7:116114669-116129664 (-) // 92.72 // q34	parvalbumin	Pvalb	chr7q34	25269	NM_022499	---
1369326_at	NNN	0.0738451	Akap6	AKAP6	NM_022618	chr6q23	1369326_at	164.646	132.642	131.747	16.5882	5.6151	4.61346	4.15023	8.95786	8.93582	16.0944	13.7363	Rn.48703.1	gb:NM_022618.1 /DB_XREF=gi:12018299 /GEN=Akap6 /FEA=FLmRNA /CNT=2 /TID=Rn.48703.1 /TIER=FL /STK=2 /UG=Rn.48703 /LL=64553 /DEF=Rattus norvegicus A-kinase anchor protein (Akap6), mRNA. /PROD=A-kinase anchor protein /FL=gb:NM_022618.1 gb:AF139518.1	NM_022618	Rn.48703	Rn.147642	chr6:73013358-73354520 (+) // 97.68 // q23	A kinase (PRKA) anchor protein 6	Akap6	chr6q23	64553	NM_022618	G_Protein_Signaling // GenMAPP
1367739_at	NNN	0.0685717	Cox8h	COX8H	NM_012786	chr1q41	1367739_at	19691	25871.5	24044.8	13220	7845	980.462	249.352	2111.17	1633.05	12.6278	12.7721	Rn.10325.1	gb:NM_012786.1 /DB_XREF=gi:6978692 /GEN=Cox8h /FEA=FLmRNA /CNT=23 /TID=Rn.10325.1 /TIER=FL+Stack /STK=19 /UG=Rn.10325 /LL=25250 /DEF=Rattus norvegicus Cytochrome c oxidase subunit VIII-H (heartmuscle) (Cox8h), mRNA. /PROD=cytochrome c oxidase subunit VIII-H(heartmuscle) /FL=gb:NM_012786.1	NM_012786	Rn.10325	Rn.10325	chr1:201057313-201058771 (-) // 82.68 // q41	Cytochrom c oxidase subunit VIII-H (heart/muscle)	Cox8h	chr1q41	25250	NM_012786	Electron_Transport_Chain // GenMAPP
1375031_at	NNN	0.0662979	---	---	AI171653	---	1375031_at	1718.42	1761.73	1346.65	672.074	360.15	61.0687	10.1119	114.016	125.556	63.8563	23.6257	Rn.20503.1	gb:AI171653 /DB_XREF=gi:3711693 /DB_XREF=EST217626 /CLONE=RMUBN87 /FEA=EST /CNT=6 /TID=Rn.20503.1 /TIER=Stack /STK=6 /UG=Rn.20503 /UG_TITLE=ESTs, Weakly similar to NEO1_RAT NEOGENIN PRECURSOR (R.norvegicus)	AI171653	Rn.20503	Rn.199322	chr3:59604865-59605276 (-) // 95.8 // q23	Transcribed locus, moderately similar to XP_342453.2 PREDICTED: titin [Rattus norvegicus]	---	---	0	---	---
1377499_a_at	NNN	0.0610211	Hrc	HRC	BF420810	chr1q22	1377499_a_at	5330.44	5296.25	4765.22	2791.04	822.244	164.827	18.9281	350.423	393.596	66.8267	24.5513	Rn.41521.1	gb:BF420810 /DB_XREF=gi:11408799 /DB_XREF=UI-R-BJ2-bqa-e-02-0-UI.s1 /CLONE=UI-R-BJ2-bqa-e-02-0-UI /FEA=EST /CNT=4 /TID=Rn.41521.1 /TIER=ConsEnd /STK=4 /UG=Rn.41521 /UG_TITLE=ESTs, Weakly similar to A54660 histidine rich calcium binding protein (H.sapiens)	BF420810	Rn.41521	Rn.41521	chr1:95805371-95808774 (+) // 100.0 // q22	histidine rich calcium binding protein	Hrc	chr1q22	292905	NM_181369	---
1394140_at	NNN	0.0606974	Ka25	KA25	AI639284	chr10q32.1	1394140_at	1986.86	1470.8	1116.11	848.541	1635.04	43.0573	24.2593	163.394	111.981	71.4291	121.005	Rn.43914.1	gb:AI639284 /DB_XREF=gi:4700318 /DB_XREF=rx01678s /CLONE=rx01678 /FEA=EST /CNT=1 /TID=Rn.43914.1 /TIER=ConsEnd /STK=1 /UG=Rn.43914 /UG_TITLE=EST, Highly similar to A61404 keratin A, type I - mouse (M.musculus)	AI639284	Rn.43914	Rn.129815	chr10:88982203-88982636 (-) // 99.31 // q32.1	type I hair keratin KA25	Ka25	chr10q32.1	450228	NM_001008817	---
1388349_at	NNN	0.0592129	---	---	AA799557	---	1388349_at	19342.5	17994.2	16359.7	11398	3509.67	482.628	163.651	1286.64	1316.88	6.78472	68.7146	Rn.3905.1	gb:AA799557 /DB_XREF=gi:2862512 /DB_XREF=EST189054 /CLONE=RHEAC52 /FEA=EST /CNT=31 /TID=Rn.3905.1 /TIER=Stack /STK=23 /UG=Rn.3905 /UG_TITLE=ESTs, Highly similar to KCRS RAT CREATINE KINASE, SARCOMERIC MITOCHONDRIAL PRECURSOR (R.norvegicus)	AA799557	Rn.3905	Rn.216469	---	Transcribed locus, strongly similar to XP_424899.1 PREDICTED: similar to Creatine kinase, sarcomeric mitochondrial precursor (S-MtCK) (Mib-CK) (Basic-type mitochondrial creatine kinase) [Gallus gallus]	---	---	0	---	---
1389079_at	NNN	0.0585525	Dhrs7c_predicted	DHRS7C_PREDICTED	AI639268	chr10q24	1389079_at	2235.44	3948.14	3033.44	966.987	426.702	62.5127	60.2164	101.856	272.442	51.0011	17.495	Rn.34592.1	gb:AI639268 /DB_XREF=gi:4700302 /DB_XREF=rx03018s /CLONE=rx03018 /FEA=EST /CNT=10 /TID=Rn.34592.1 /TIER=Stack /STK=9 /UG=Rn.34592 /UG_TITLE=ESTs, Weakly similar to T17307 hypothetical protein DKFZp566O084.1 (H.sapiens)	AI639268	Rn.34592	Rn.81884	chr10:54535040-54536169 (+) // 95.41 // q24	dehydrogenase/reductase (SDR family) member 7C (predicted)	Dhrs7c_predicted	chr10q24	287411	XM_001078936 /// XM_213343	---
1370124_at	NNN	0.0581886	Mt3	MT3	NM_053968	chr19p12	1370124_at	2007.51	4496.88	3518.32	1170.43	952.342	133.888	32.6842	225.264	173.547	57.9065	31.3129	Rn.11325.1	gb:NM_053968.1 /DB_XREF=gi:16758857 /GEN=Mt3 /FEA=FLmRNA /CNT=7 /TID=Rn.11325.1 /TIER=FL /STK=0 /UG=Rn.11325 /LL=117038 /DEF=Rattus norvegicus metallothionein 3 (Mt3), mRNA. /PROD=metallothionein 3 /FL=gb:NM_053968.1	NM_053968	Rn.11325	Rn.11325	chr19:11284551-11286389 (-) // 89.24 // p12	metallothionein 3	Mt3	chr19p12	117038	NM_053968	---
1371280_at	NNN	0.0559788	LOC497995	LOC497995	AB003753	chr10q32.1	1371280_at	647.662	545.033	276.394	153.431	228.868	24.691	17.3973	17.7195	23.1029	39.2661	21.3236	Rn.44357.1	gb:AB003753 /DB_XREF=gi:3046870 /FEA=DNA_2 /CNT=1 /TID=Rn.44357.1 /TIER=ConsEnd /STK=0 /UG=Rn.44357 /UG_TITLE=Rattus norvegicus genes for high sulfur protein B2E and high sulfur protein B2F, complete cds /DEF=Rattus norvegicus genes for high sulfur protein B2E and high sulfur protein B2F, complete cds	AB003753	Rn.44357	Rn.190823	chr10:88536392-88536761 (-) // 100.0 // q32.1 /// chr10:88552649-88553015 (-) // 96.21 // q32.1	high sulfur protein B2F	LOC497995	chr10q32.1	497995	NM_001025135	---
1386907_at	NNN	0.0555985	Eno3	ENO3	NM_012949	chr10q24	1386907_at	17409.1	15694.9	13945	10635.8	2702.47	418.014	48.9136	1069.25	1149.77	822.775	235.606	Rn.3443.1	gb:NM_012949.1 /DB_XREF=gi:6978810 /GEN=Eno3 /FEA=FLmRNA /CNT=25 /TID=Rn.3443.1 /TIER=FL+Stack /STK=22 /UG=Rn.3443 /LL=25438 /DEF=Rattus norvegicus Muscle specific enolase (beta beta enolose) (Eno3), mRNA. /PROD=muscle specific enolase (beta beta enolose) (twosplicing products) /FL=gb:NM_012949.1	NM_012949	Rn.3443	Rn.3443	chr10:57537626-57542317 (+) // 97.88 // q24	enolase 3, beta	Eno3	chr10q24	25438	NM_012949	Glycolysis_and_Gluconeogenesis // GenMAPP
1376884_a_at	NNN	0.0507575	Rpl3l_predicted	RPL3L_PREDICTED	BE111378	chr10q12	1376884_a_at	3043.43	3019.08	2813.65	1227.66	329.649	48.1696	37.7698	122.015	215.707	105.341	7.44481	Rn.16548.2	gb:BE111378 /DB_XREF=gi:8503483 /DB_XREF=UI-R-BJ1-auy-b-01-0-UI.s1 /CLONE=UI-R-BJ1-auy-b-01-0-UI /FEA=EST /CNT=2 /TID=Rn.16548.2 /TIER=ConsEnd /STK=1 /UG=Rn.16548 /UG_TITLE=ESTs, Moderately similar to RL3 RAT 60S RIBOSOMAL PROTEIN L3 (R.norvegicus)	BE111378	Rn.16548	Rn.105722	chr10:13989987-13992491 (+) // 99.55 // q12	ribosomal protein L3-like (predicted)	Rpl3l_predicted	chr10q12	287122	XM_001058430 /// XM_213231	---
1367951_at	NNN	0.0478841	Pgam2	PGAM2	NM_017328	chr14q21-q22	1367951_at	10021.3	14074.2	9475.12	7078.46	2773.7	201.944	115.187	795.301	550.978	8.12245	5.50189	Rn.9738.1	gb:NM_017328.1 /DB_XREF=gi:8393947 /GEN=Pgam2 /FEA=FLmRNA /CNT=14 /TID=Rn.9738.1 /TIER=FL+Stack /STK=12 /UG=Rn.9738 /LL=24959 /DEF=Rattus norvegicus Phosphoglycerate mutase 2 (Pgam2), mRNA. /PROD=phosphoglycerate mutase 2 /FL=gb:M31835.1 gb:NM_017328.1	NM_017328	Rn.9738	Rn.9738	chr14:86465885-86469328 (-) // 95.72 // q21	phosphoglycerate mutase 2	Pgam2	chr14q21-q22	24959	NM_017328	Glycolysis_and_Gluconeogenesis // GenMAPP
1398584_at	NNN	0.0457973	Krt1-5	KRT1-5	AA875307	chr10q32.1	1398584_at	9805.51	6954.93	7711.8	5041.12	6006.54	81.5381	21.5154	685.323	512.996	143.81	36.4592	Rn.2873.1	gb:AA875307 /DB_XREF=gi:4231186 /DB_XREF=UI-R-E0-cn-f-07-0-UI.s1 /CLONE=UI-R-E0-cn-f-07-0-UI /FEA=EST /CNT=3 /TID=Rn.2873.1 /TIER=ConsEnd /STK=1 /UG=Rn.2873 /UG_TITLE=ESTs, Weakly similar to KERATIN, TYPE I CYTOSKELETAL 21 (R.norvegicus)	AA875307	Rn.2873	Rn.2873	chr10:89041496-89042718 (-) // 100.0 // q32.1	keratin complex 1, acidic, gene 5	Krt1-5	chr10q32.1	287698	NM_001008759	---
1380628_at	NNN	0.0159876	Krt1-4	KRT1-4	BM385749	chr10q32.1	1380628_at	5047.76	2866.12	835.907	710.804	1051.94	8.4152	5.20812	108.07	12.7635	15.6798	9.63198	Rn.43921.1	gb:BM385749 /DB_XREF=gi:18185802 /DB_XREF=UI-R-CN1-clx-j-03-0-UI.s1 /CLONE=UI-R-CN1-clx-j-03-0-UI /FEA=EST /CNT=2 /TID=Rn.43921.1 /TIER=ConsEnd /STK=2 /UG=Rn.43921 /UG_TITLE=ESTs	BM385749	Rn.43921	Rn.43921	chr10:88973088-88973756 (-) // 100.0 // q32.1	keratin complex 1, acidic, gene 4	Krt1-4	chr10q32.1	303528	NM_001008758	---
1370900_at	NNN	0.0124879	Myh4	MYH4	BM391169	chr10q24	1370900_at	8522.9	3952.15	3358.86	3678.93	1066.46	87.6938	6.2297	10.5333	101.138	100.324	14.9313	Rn.1072.1	gb:BM391169 /DB_XREF=gi:18191222 /DB_XREF=UI-R-DY0-ckq-e-03-0-UI.s1 /CLONE=UI-R-DY0-ckq-e-03-0-UI /FEA=mRNA /CNT=13 /TID=Rn.1072.1 /TIER=Stack /STK=11 /UG=Rn.1072 /UG_TITLE=Rattus norvegicus myosin heavy chain mRNA, 3 end	BM391169	Rn.1072	Rn.202948	chr10:53953267-53955036 (+) // 99.73 // q24	myosin, heavy polypeptide 4	Myh4	chr10q24	360543	NM_019325 /// XM_001078843 /// XM_340818	Striated_muscle_contraction // GenMAPP
