# Supplementary material for: Identification and Confirmation of the miR-30 Family as a Potential Central Player in Tobacco-Related Head and Neck Squamous Cell Carcinoma
Source: Front Oncol. 2021 Jul 13;11:616372. doi: 10.3389/fonc.2021.616372 (PMC8315965; doi:10.3389/fonc.2021.616372)
Supplement: Supplementary file 6 [file Table_4.xls]

## Sheet: microRNA-go
MicroRNA	GO
rno-let-7a	oxidation reduction
rno-let-7a	fatty acid metabolic process
rno-let-7a	fatty acid beta-oxidation
rno-let-7a	defense response to Gram-positive bacterium
rno-let-7a	muscle thin filament assembly
rno-let-7a	regulation of circadian sleep/wake cycle, sleep
rno-let-7a	positive regulation of immune response
rno-let-7a	phosphatidylcholine biosynthetic process
rno-let-7a	thyroid hormone generation
rno-let-7d	oxidation reduction
rno-let-7d	fatty acid metabolic process
rno-let-7d	fatty acid beta-oxidation
rno-let-7d	defense response to Gram-positive bacterium
rno-let-7d	regulation of circadian sleep/wake cycle, sleep
rno-let-7d	response to glucocorticoid stimulus
rno-let-7d	negative regulation of protein kinase activity
rno-let-7d	positive regulation of immune response
rno-let-7d	phosphatidylcholine biosynthetic process
rno-let-7d	thyroid hormone generation
rno-let-7f	oxidation reduction
rno-let-7f	fatty acid metabolic process
rno-let-7f	fatty acid beta-oxidation
rno-let-7f	defense response to Gram-positive bacterium
rno-let-7f	muscle thin filament assembly
rno-let-7f	regulation of circadian sleep/wake cycle, sleep
rno-let-7f	positive regulation of immune response
rno-let-7f	thyroid hormone generation
rno-miR-1	oxidation reduction
rno-miR-1	ion transport
rno-miR-100	oxidation reduction
rno-miR-100	carbohydrate metabolic process
rno-miR-100	ion transport
rno-miR-100	skeletal muscle contraction
rno-miR-100	cellular carbohydrate metabolic process
rno-miR-100	glycolysis
rno-miR-100	tricarboxylic acid cycle
rno-miR-100	heart development
rno-miR-100	somitogenesis
rno-miR-100	malate metabolic process
rno-miR-101a	oxidation reduction
rno-miR-101a	carbohydrate metabolic process
rno-miR-101a	cellular carbohydrate metabolic process
rno-miR-101a	glycolysis
rno-miR-101a	muscle thin filament assembly
rno-miR-101a	glucose homeostasis
rno-miR-101a	electron transport chain
rno-miR-101a	tricarboxylic acid cycle
rno-miR-101a	cardiac myofibril assembly
rno-miR-101a	heart development
rno-miR-101a	negative regulation of protein kinase activity
rno-miR-101a	somitogenesis
rno-miR-101a	glycogen metabolic process
rno-miR-101a	cardiac muscle contraction
rno-miR-101a	regulation of heart contraction
rno-miR-101a	malate metabolic process
rno-miR-101a	actin filament-based movement
rno-miR-10b	muscle contraction
rno-miR-10b	oxidation reduction
rno-miR-10b	carbohydrate metabolic process
rno-miR-10b	fatty acid metabolic process
rno-miR-10b	fatty acid beta-oxidation
rno-miR-10b	ion transport
rno-miR-10b	cellular carbohydrate metabolic process
rno-miR-10b	glycolysis
rno-miR-10b	neutrophil chemotaxis
rno-miR-10b	tricarboxylic acid cycle
rno-miR-10b	striated muscle contraction
rno-miR-10b	chemotaxis
rno-miR-10b	malate metabolic process
rno-miR-126	carbohydrate metabolic process
rno-miR-126	ion transport
rno-miR-126	skeletal muscle contraction
rno-miR-126	glycolysis
rno-miR-126	neurological system process
rno-miR-126*	oxidation reduction
rno-miR-126*	carbohydrate metabolic process
rno-miR-126*	ion transport
rno-miR-126*	cellular carbohydrate metabolic process
rno-miR-126*	glycolysis
rno-miR-126*	tricarboxylic acid cycle
rno-miR-126*	oxaloacetate metabolic process
rno-miR-126*	striated muscle contraction
rno-miR-126*	malate metabolic process
rno-miR-126*	NAD metabolic process
rno-miR-127	oxidation reduction
rno-miR-127	carbohydrate metabolic process
rno-miR-127	cellular carbohydrate metabolic process
rno-miR-127	glycolysis
rno-miR-127	electron transport chain
rno-miR-127	tricarboxylic acid cycle
rno-miR-127	oxaloacetate metabolic process
rno-miR-127	positive regulation of immune response
rno-miR-127	malate metabolic process
rno-miR-127	NAD metabolic process
rno-miR-128	glycolysis
rno-miR-128	glucose homeostasis
rno-miR-133a	oxidation reduction
rno-miR-133a	ion transport
rno-miR-133a	long-chain fatty acid biosynthetic process
rno-miR-133a	somitogenesis
rno-miR-133a	cardiac muscle contraction
rno-miR-133a	anagen
rno-miR-133b	oxidation reduction
rno-miR-133b	ion transport
rno-miR-133b	long-chain fatty acid biosynthetic process
rno-miR-133b	somitogenesis
rno-miR-133b	cardiac muscle contraction
rno-miR-133b	anagen
rno-miR-136	muscle contraction
rno-miR-136	carbohydrate metabolic process
rno-miR-136	defense response to Gram-positive bacterium
rno-miR-136	muscle thin filament assembly
rno-miR-136	striated muscle contraction
rno-miR-136	glycogen metabolic process
rno-miR-136	phosphatidylcholine biosynthetic process
rno-miR-143	ion transport
rno-miR-143	heart development
rno-miR-143	somitogenesis
rno-miR-145	oxidation reduction
rno-miR-145	carbohydrate metabolic process
rno-miR-145	fatty acid metabolic process
rno-miR-145	fatty acid beta-oxidation
rno-miR-145	ion transport
rno-miR-145	tissue regeneration
rno-miR-146b	muscle contraction
rno-miR-146b	cardiac myofibril assembly
rno-miR-148b-3p	electron transport chain
rno-miR-148b-3p	ureteric bud branching
rno-miR-148b-3p	striated muscle contraction
rno-miR-148b-3p	heart development
rno-miR-148b-3p	embryonic heart tube development
rno-miR-150	muscle contraction
rno-miR-150	oxidation reduction
rno-miR-150	ion transport
rno-miR-150	skeletal muscle contraction
rno-miR-150	glycolysis
rno-miR-150	neurological system process
rno-miR-150	regulation of muscle contraction
rno-miR-150	glucose homeostasis
rno-miR-150	striated muscle contraction
rno-miR-150	heart development
rno-miR-150	positive regulation of immune response
rno-miR-150	cardiac muscle contraction
rno-miR-150	regulation of heart contraction
rno-miR-151	muscle contraction
rno-miR-151	fatty acid metabolic process
rno-miR-151	fatty acid beta-oxidation
rno-miR-151	ion transport
rno-miR-151	glycolysis
rno-miR-151	glucose homeostasis
rno-miR-151	striated muscle contraction
rno-miR-151	heart development
rno-miR-151	embryonic heart tube development
rno-miR-151	phosphatidylcholine biosynthetic process
rno-miR-151	thyroid hormone generation
rno-miR-151	cellular calcium ion homeostasis
rno-miR-185	ion transport
rno-miR-185	defense response to Gram-positive bacterium
rno-miR-185	muscle thin filament assembly
rno-miR-188	ion transport
rno-miR-188	positive regulation of immune response
rno-miR-195	carbohydrate metabolic process
rno-miR-195	electron transport chain
rno-miR-195	glycogen metabolic process
rno-miR-195	phosphatidylcholine biosynthetic process
rno-miR-204	carbohydrate metabolic process
rno-miR-204	calcium ion homeostasis
rno-miR-204	heart development
rno-miR-204	regulation of heart contraction
rno-miR-206	oxidation reduction
rno-miR-206	carbohydrate metabolic process
rno-miR-206	cellular carbohydrate metabolic process
rno-miR-206	glycolysis
rno-miR-206	tricarboxylic acid cycle
rno-miR-206	oxaloacetate metabolic process
rno-miR-206	malate metabolic process
rno-miR-206	NAD metabolic process
rno-miR-21	oxidation reduction
rno-miR-21	carbohydrate metabolic process
rno-miR-21	cellular carbohydrate metabolic process
rno-miR-21	glycolysis
rno-miR-21	neutrophil chemotaxis
rno-miR-21	electron transport chain
rno-miR-21	long-chain fatty acid biosynthetic process
rno-miR-21	tricarboxylic acid cycle
rno-miR-21	oxaloacetate metabolic process
rno-miR-21	response to glucocorticoid stimulus
rno-miR-21	chemotaxis
rno-miR-21	malate metabolic process
rno-miR-21	NAD metabolic process
rno-miR-21	anagen
rno-miR-21	actin filament-based movement
rno-miR-22	muscle contraction
rno-miR-22	oxidation reduction
rno-miR-22	ion transport
rno-miR-22	glucose homeostasis
rno-miR-22	electron transport chain
rno-miR-22	negative regulation of protein kinase activity
rno-miR-22	regulation of heart contraction
rno-miR-221	muscle contraction
rno-miR-221	oxidation reduction
rno-miR-221	fatty acid metabolic process
rno-miR-221	fatty acid beta-oxidation
rno-miR-221	striated muscle contraction
rno-miR-222	muscle contraction
rno-miR-222	oxidation reduction
rno-miR-222	fatty acid metabolic process
rno-miR-222	fatty acid beta-oxidation
rno-miR-222	striated muscle contraction
rno-miR-222	heart development
rno-miR-223	carbohydrate metabolic process
rno-miR-223	glycolysis
rno-miR-223	neutrophil chemotaxis
rno-miR-223	chemotaxis
rno-miR-223	glycogen metabolic process
rno-miR-223	phosphatidylcholine biosynthetic process
rno-miR-224	muscle contraction
rno-miR-224	oxidation reduction
rno-miR-224	striated muscle contraction
rno-miR-224	tissue regeneration
rno-miR-26a	muscle contraction
rno-miR-26a	oxidation reduction
rno-miR-26a	carbohydrate metabolic process
rno-miR-26a	fatty acid metabolic process
rno-miR-26a	skeletal muscle contraction
rno-miR-26a	cellular carbohydrate metabolic process
rno-miR-26a	glycolysis
rno-miR-26a	regulation of muscle contraction
rno-miR-26a	neutrophil chemotaxis
rno-miR-26a	electron transport chain
rno-miR-26a	tricarboxylic acid cycle
rno-miR-26a	cardiac myofibril assembly
rno-miR-26a	chemotaxis
rno-miR-26a	malate metabolic process
rno-miR-26b	muscle contraction
rno-miR-26b	oxidation reduction
rno-miR-26b	carbohydrate metabolic process
rno-miR-26b	fatty acid metabolic process
rno-miR-26b	skeletal muscle contraction
rno-miR-26b	cellular carbohydrate metabolic process
rno-miR-26b	glycolysis
rno-miR-26b	regulation of muscle contraction
rno-miR-26b	neutrophil chemotaxis
rno-miR-26b	electron transport chain
rno-miR-26b	tricarboxylic acid cycle
rno-miR-26b	cardiac myofibril assembly
rno-miR-26b	chemotaxis
rno-miR-26b	malate metabolic process
rno-miR-299	muscle contraction
rno-miR-299	oxidation reduction
rno-miR-299	carbohydrate metabolic process
rno-miR-299	ion transport
rno-miR-299	cellular carbohydrate metabolic process
rno-miR-299	glycolysis
rno-miR-299	neurological system process
rno-miR-299	ureteric bud branching
rno-miR-299	striated muscle contraction
rno-miR-299	NAD metabolic process
rno-miR-29a	oxidation reduction
rno-miR-29a	fatty acid metabolic process
rno-miR-29a	fatty acid beta-oxidation
rno-miR-29a	ion transport
rno-miR-29a	electron transport chain
rno-miR-29a	response to glucocorticoid stimulus
rno-miR-29a	detection of chemical stimulus involved in sensory perception of smell
rno-miR-29a	chemotaxis
rno-miR-29a	phosphatidylcholine biosynthetic process
rno-miR-29a	cellular calcium ion homeostasis
rno-miR-29b	muscle contraction
rno-miR-29b	oxidation reduction
rno-miR-29b	fatty acid metabolic process
rno-miR-29b	fatty acid beta-oxidation
rno-miR-29b	electron transport chain
rno-miR-29b	ureteric bud branching
rno-miR-29b	chemotaxis
rno-miR-29b	phosphatidylcholine biosynthetic process
rno-miR-29c	muscle contraction
rno-miR-29c	oxidation reduction
rno-miR-29c	fatty acid metabolic process
rno-miR-29c	fatty acid beta-oxidation
rno-miR-29c	ion transport
rno-miR-29c	electron transport chain
rno-miR-29c	ureteric bud branching
rno-miR-29c	response to glucocorticoid stimulus
rno-miR-29c	chemotaxis
rno-miR-29c	phosphatidylcholine biosynthetic process
rno-miR-29c	cellular calcium ion homeostasis
rno-miR-29c*	muscle contraction
rno-miR-29c*	oxidation reduction
rno-miR-29c*	electron transport chain
rno-miR-29c*	regulation of circadian sleep/wake cycle, sleep
rno-miR-29c*	striated muscle contraction
rno-miR-29c*	response to glucocorticoid stimulus
rno-miR-300-3p	oxidation reduction
rno-miR-30a-5p	oxidation reduction
rno-miR-30a-5p	carbohydrate metabolic process
rno-miR-30a-5p	cellular carbohydrate metabolic process
rno-miR-30a-5p	glycolysis
rno-miR-30a-5p	muscle thin filament assembly
rno-miR-30a-5p	cardiac myofibril assembly
rno-miR-30a-5p	glycogen metabolic process
rno-miR-30a-5p	cardiac muscle contraction
rno-miR-30a-5p	NAD metabolic process
rno-miR-30a-5p	cellular calcium ion homeostasis
rno-miR-30a-5p	actin filament-based movement
rno-miR-30a-5p	negative regulation of axonogenesis
rno-miR-30a-3p	carbohydrate metabolic process
rno-miR-30a-3p	fatty acid metabolic process
rno-miR-30a-3p	fatty acid beta-oxidation
rno-miR-30a-3p	ion transport
rno-miR-30a-3p	electron transport chain
rno-miR-30a-3p	ureteric bud branching
rno-miR-30a-3p	long-chain fatty acid biosynthetic process
rno-miR-30a-3p	oxaloacetate metabolic process
rno-miR-30a-3p	response to glucocorticoid stimulus
rno-miR-30a-3p	heart development
rno-miR-30a-3p	negative regulation of protein kinase activity
rno-miR-30a-3p	anagen
rno-miR-30a-3p	embryonic heart tube development
rno-miR-30a-3p	actin filament-based movement
rno-miR-30b-5p	muscle contraction
rno-miR-30b-5p	oxidation reduction
rno-miR-30b-5p	carbohydrate metabolic process
rno-miR-30b-5p	ion transport
rno-miR-30b-5p	cellular carbohydrate metabolic process
rno-miR-30b-5p	glycolysis
rno-miR-30b-5p	muscle thin filament assembly
rno-miR-30b-5p	neutrophil chemotaxis
rno-miR-30b-5p	cardiac myofibril assembly
rno-miR-30b-5p	striated muscle contraction
rno-miR-30b-5p	somitogenesis
rno-miR-30b-5p	chemotaxis
rno-miR-30b-5p	glycogen metabolic process
rno-miR-30b-5p	cardiac muscle contraction
rno-miR-30b-5p	NAD metabolic process
rno-miR-30b-5p	anagen
rno-miR-30b-5p	cellular calcium ion homeostasis
rno-miR-30b-5p	actin filament-based movement
rno-miR-30b-5p	negative regulation of axonogenesis
rno-miR-30c-5p	oxidation reduction
rno-miR-30c-5p	carbohydrate metabolic process
rno-miR-30c-5p	cellular carbohydrate metabolic process
rno-miR-30c-5p	glycolysis
rno-miR-30c-5p	muscle thin filament assembly
rno-miR-30c-5p	neutrophil chemotaxis
rno-miR-30c-5p	cardiac myofibril assembly
rno-miR-30c-5p	somitogenesis
rno-miR-30c-5p	chemotaxis
rno-miR-30c-5p	glycogen metabolic process
rno-miR-30c-5p	cardiac muscle contraction
rno-miR-30c-5p	NAD metabolic process
rno-miR-30c-5p	anagen
rno-miR-30c-5p	cellular calcium ion homeostasis
rno-miR-30c-5p	actin filament-based movement
rno-miR-30c-5p	negative regulation of axonogenesis
rno-miR-30d-5p	muscle contraction
rno-miR-30d-5p	oxidation reduction
rno-miR-30d-5p	carbohydrate metabolic process
rno-miR-30d-5p	fatty acid metabolic process
rno-miR-30d-5p	fatty acid beta-oxidation
rno-miR-30d-5p	cellular carbohydrate metabolic process
rno-miR-30d-5p	glycolysis
rno-miR-30d-5p	muscle thin filament assembly
rno-miR-30d-5p	long-chain fatty acid biosynthetic process
rno-miR-30d-5p	cardiac myofibril assembly
rno-miR-30d-5p	somitogenesis
rno-miR-30d-5p	glycogen metabolic process
rno-miR-30d-5p	cardiac muscle contraction
rno-miR-30d-5p	NAD metabolic process
rno-miR-30d-5p	anagen
rno-miR-30d-5p	cellular calcium ion homeostasis
rno-miR-30d-5p	actin filament-based movement
rno-miR-30d-5p	negative regulation of axonogenesis
rno-miR-30e-5p	oxidation reduction
rno-miR-30e-5p	carbohydrate metabolic process
rno-miR-30e-5p	fatty acid metabolic process
rno-miR-30e-5p	fatty acid beta-oxidation
rno-miR-30e-5p	cellular carbohydrate metabolic process
rno-miR-30e-5p	glycolysis
rno-miR-30e-5p	muscle thin filament assembly
rno-miR-30e-5p	ureteric bud branching
rno-miR-30e-5p	long-chain fatty acid biosynthetic process
rno-miR-30e-5p	cardiac myofibril assembly
rno-miR-30e-5p	heart development
rno-miR-30e-5p	glycogen metabolic process
rno-miR-30e-5p	cardiac muscle contraction
rno-miR-30e-5p	NAD metabolic process
rno-miR-30e-5p	anagen
rno-miR-30e-5p	embryonic heart tube development
rno-miR-30e-5p	cellular calcium ion homeostasis
rno-miR-30e-5p	actin filament-based movement
rno-miR-30e-5p	negative regulation of axonogenesis
rno-miR-30e-3p	carbohydrate metabolic process
rno-miR-30e-3p	fatty acid metabolic process
rno-miR-30e-3p	fatty acid beta-oxidation
rno-miR-30e-3p	electron transport chain
rno-miR-30e-3p	ureteric bud branching
rno-miR-30e-3p	long-chain fatty acid biosynthetic process
rno-miR-30e-3p	oxaloacetate metabolic process
rno-miR-30e-3p	response to glucocorticoid stimulus
rno-miR-30e-3p	heart development
rno-miR-30e-3p	negative regulation of protein kinase activity
rno-miR-30e-3p	tissue regeneration
rno-miR-30e-3p	anagen
rno-miR-30e-3p	embryonic heart tube development
rno-miR-30e-3p	actin filament-based movement
rno-miR-31	muscle contraction
rno-miR-31	oxidation reduction
rno-miR-31	carbohydrate metabolic process
rno-miR-31	ion transport
rno-miR-31	skeletal muscle contraction
rno-miR-31	cellular carbohydrate metabolic process
rno-miR-31	glycolysis
rno-miR-31	regulation of muscle contraction
rno-miR-31	tricarboxylic acid cycle
rno-miR-31	oxaloacetate metabolic process
rno-miR-31	heart development
rno-miR-31	negative regulation of protein kinase activity
rno-miR-31	somitogenesis
rno-miR-31	positive regulation of immune response
rno-miR-31	cardiac muscle contraction
rno-miR-31	regulation of heart contraction
rno-miR-31	malate metabolic process
rno-miR-31	NAD metabolic process
rno-miR-31	anagen
rno-miR-31	negative regulation of axonogenesis
rno-miR-320	regulation of circadian sleep/wake cycle, sleep
rno-miR-320	response to glucocorticoid stimulus
rno-miR-322	muscle contraction
rno-miR-322	fatty acid metabolic process
rno-miR-322	fatty acid beta-oxidation
rno-miR-322	ion transport
rno-miR-322	cardiac myofibril assembly
rno-miR-322	somitogenesis
rno-miR-322	cardiac muscle contraction
rno-miR-322	anagen
rno-miR-322	cellular calcium ion homeostasis
rno-miR-338	oxidation reduction
rno-miR-338	fatty acid metabolic process
rno-miR-338	ion transport
rno-miR-338	neutrophil chemotaxis
rno-miR-338	ureteric bud branching
rno-miR-338	response to glucocorticoid stimulus
rno-miR-338	negative regulation of protein kinase activity
rno-miR-338	somitogenesis
rno-miR-338	chemotaxis
rno-miR-338	cardiac muscle contraction
rno-miR-338	anagen
rno-miR-352	fatty acid metabolic process
rno-miR-352	fatty acid beta-oxidation
rno-miR-352	ion transport
rno-miR-352	response to glucocorticoid stimulus
rno-miR-352	negative regulation of protein kinase activity
rno-miR-352	positive regulation of immune response
rno-miR-352	phosphatidylcholine biosynthetic process
rno-miR-378	carbohydrate metabolic process
rno-miR-378	ion transport
rno-miR-378	tricarboxylic acid cycle
rno-miR-378	response to glucocorticoid stimulus
rno-miR-378	tissue regeneration
rno-miR-378*	muscle contraction
rno-miR-378*	oxidation reduction
rno-miR-378*	ion transport
rno-miR-378*	skeletal muscle contraction
rno-miR-378*	defense response to Gram-positive bacterium
rno-miR-378*	regulation of muscle contraction
rno-miR-378*	calcium ion homeostasis
rno-miR-378*	cardiac myofibril assembly
rno-miR-378*	heart development
rno-miR-378*	positive regulation of immune response
rno-miR-378*	cardiac muscle contraction
rno-miR-378*	regulation of heart contraction
rno-miR-434	ion transport
rno-miR-434	neurological system process
rno-miR-434	muscle thin filament assembly
rno-miR-434	cardiac myofibril assembly
rno-miR-434	cardiac muscle contraction
rno-miR-434	actin filament-based movement
rno-miR-451	oxidation reduction
rno-miR-451	carbohydrate metabolic process
rno-miR-451	ureteric bud branching
rno-miR-451	positive regulation of immune response
rno-miR-451	tissue regeneration
rno-miR-497	oxidation reduction
rno-miR-497	carbohydrate metabolic process
rno-miR-497	ion transport
rno-miR-497	cellular carbohydrate metabolic process
rno-miR-497	glycolysis
rno-miR-497	neurological system process
rno-miR-497	glucose homeostasis
rno-miR-497	calcium ion homeostasis
rno-miR-497	somitogenesis
rno-miR-497	cardiac muscle contraction
rno-miR-497	NAD metabolic process
rno-miR-497	anagen
rno-miR-99a	oxidation reduction
rno-miR-99a	carbohydrate metabolic process
rno-miR-99a	ion transport
rno-miR-99a	skeletal muscle contraction
rno-miR-99a	cellular carbohydrate metabolic process
rno-miR-99a	glycolysis
rno-miR-99a	tricarboxylic acid cycle
rno-miR-99a	heart development
rno-miR-99a	malate metabolic process

## Sheet: MicroRNA and GO attributes
micro-RNA	Degree	feature
rno-miR-31	20	up
rno-miR-30b-5p	19	down
rno-miR-30e-5p	19	down
rno-miR-30d-5p	18	down
rno-miR-101a	17	down
rno-miR-30c-5p	16	down
rno-miR-21	15	up
rno-miR-26a	14	down
rno-miR-26b	14	down
rno-miR-30a-3p	14	down
rno-miR-30e-5p	14	down
rno-miR-10b	13	down
rno-miR-150	13	down
rno-miR-151	12	down
rno-miR-30a	12	down
rno-miR-378*	12	down
rno-miR-497	12	down
rno-miR-29c	11	down
rno-miR-338	11	down
rno-let-7d	10	down
rno-miR-100	10	down
rno-miR-126*	10	down
rno-miR-127	10	down
rno-miR-299	10	down
rno-miR-29a	10	down
rno-let-7a	9	down
rno-miR-322	9	down
rno-miR-99a	9	down
rno-let-7f	8	down
rno-miR-206	8	down
rno-miR-29b	8	down
rno-miR-136	7	down
rno-miR-22	7	down
rno-miR-352	7	down
rno-miR-133a	6	down
rno-miR-133b	6	down
rno-miR-222	6	up
rno-miR-223	6	up
rno-miR-29c*	6	down
rno-miR-434	6	down
rno-miR-126	5	down
rno-miR-148b-3p	5	down
rno-miR-221	5	up
rno-miR-378	5	down
rno-miR-451	5	down
rno-miR-195	4	down
rno-miR-204	4	down
rno-miR-224	4	down
rno-miR-143	3	down
rno-miR-185	3	down
rno-miR-1	2	down
rno-miR-128	2	down
rno-miR-146b	2	up
rno-miR-188	2	up
rno-miR-320	2	down
rno-miR-300-3p	1	down
Go	Degree
oxidation reduction	38			MicroRNA	GO
carbohydrate metabolic process	28		1	rno-let-7a	oxidation reduction
ion transport	28		2	rno-let-7d	oxidation reduction
glycolysis	23		3	rno-let-7f	oxidation reduction
fatty acid metabolic process	20		4	rno-miR-1	oxidation reduction
muscle contraction	20		5	rno-miR-100	oxidation reduction
cellular carbohydrate metabolic process	18		6	rno-miR-101a	oxidation reduction
fatty acid beta-oxidation	17		7	rno-miR-10b	oxidation reduction
cardiac muscle contraction	15		8	rno-miR-126*	oxidation reduction
electron transport chain	14		9	rno-miR-127	oxidation reduction
heart development	14		10	rno-miR-133a	oxidation reduction
anagen	13		11	rno-miR-133b	oxidation reduction
cardiac myofibril assembly	12		12	rno-miR-145	oxidation reduction
NAD metabolic process	12		13	rno-miR-150	oxidation reduction
somitogenesis	12		14	rno-miR-206	oxidation reduction
striated muscle contraction	12		15	rno-miR-21	oxidation reduction
tricarboxylic acid cycle	12		16	rno-miR-22	oxidation reduction
chemotaxis	11		17	rno-miR-221	oxidation reduction
malate metabolic process	11		18	rno-miR-222	oxidation reduction
muscle thin filament assembly	11		19	rno-miR-224	oxidation reduction
response to glucocorticoid stimulus	11		20	rno-miR-26a	oxidation reduction
actin filament-based movement	10		21	rno-miR-26b	oxidation reduction
phosphatidylcholine biosynthetic process	10		22	rno-miR-299	oxidation reduction
positive regulation of immune response	10		23	rno-miR-29a	oxidation reduction
cellular calcium ion homeostasis	9		24	rno-miR-29b	oxidation reduction
glycogen metabolic process	9		25	rno-miR-29c	oxidation reduction
ureteric bud branching	9		26	rno-miR-29c*	oxidation reduction
negative regulation of protein kinase activity	8		27	rno-miR-300-3p	oxidation reduction
neutrophil chemotaxis	8		28	rno-miR-30a	oxidation reduction
skeletal muscle contraction	8		29	rno-miR-30b-5p	oxidation reduction
long-chain fatty acid biosynthetic process	7		30	rno-miR-30c	oxidation reduction
oxaloacetate metabolic process	7		31	rno-miR-30d	oxidation reduction
defense response to Gram-positive bacterium	6		32	rno-miR-30e	oxidation reduction
glucose homeostasis	6		33	rno-miR-31	oxidation reduction
negative regulation of axonogenesis	6		34	rno-miR-338	oxidation reduction
regulation of heart contraction	6		35	rno-miR-378*	oxidation reduction
embryonic heart tube development	5		36	rno-miR-451	oxidation reduction
neurological system process	5		37	rno-miR-497	oxidation reduction
regulation of circadian sleep/wake cycle, sleep	5		38	rno-miR-99a	oxidation reduction
regulation of muscle contraction	5
tissue regeneration	5
thyroid hormone generation	4
calcium ion homeostasis	3
detection of chemical stimulus involved in sensory perception of smell	1

## Sheet: MicroRNA and oxidation reductio
rno-miR-30a	oxidation reduction
rno-miR-30a*	oxaloacetate metabolic process
rno-miR-30b-5p	oxidation reduction
rno-miR-30c	oxidation reduction
rno-miR-30d	oxidation reduction
rno-miR-30e	oxidation reduction
rno-miR-30e*	oxaloacetate metabolic process
	MicroRNA	GO
1	rno-let-7a	oxidation reduction
2	rno-let-7d	oxidation reduction
3	rno-let-7f	oxidation reduction
4	rno-miR-1	oxidation reduction
5	rno-miR-100	oxidation reduction
6	rno-miR-101a	oxidation reduction
7	rno-miR-10b	oxidation reduction
8	rno-miR-126*	oxidation reduction
9	rno-miR-127	oxidation reduction
10	rno-miR-133a	oxidation reduction
11	rno-miR-133b	oxidation reduction
12	rno-miR-145	oxidation reduction
13	rno-miR-150	oxidation reduction
14	rno-miR-206	oxidation reduction
15	rno-miR-21	oxidation reduction
16	rno-miR-22	oxidation reduction
17	rno-miR-221	oxidation reduction
18	rno-miR-222	oxidation reduction
19	rno-miR-224	oxidation reduction
20	rno-miR-26a	oxidation reduction
21	rno-miR-26b	oxidation reduction
22	rno-miR-299	oxidation reduction
23	rno-miR-29a	oxidation reduction
24	rno-miR-29b	oxidation reduction
25	rno-miR-29c	oxidation reduction
26	rno-miR-29c*	oxidation reduction
27	rno-miR-300-3p	oxidation reduction
28	rno-miR-30a	oxidation reduction
29	rno-miR-30b-5p	oxidation reduction
30	rno-miR-30c	oxidation reduction
31	rno-miR-30d	oxidation reduction
32	rno-miR-30e	oxidation reduction
33	rno-miR-31	oxidation reduction
34	rno-miR-338	oxidation reduction
35	rno-miR-378*	oxidation reduction
36	rno-miR-451	oxidation reduction
37	rno-miR-497	oxidation reduction
38	rno-miR-99a	oxidation reduction
