# Supplementary material for: Identification and Confirmation of the miR-30 Family as a Potential Central Player in Tobacco-Related Head and Neck Squamous Cell Carcinoma
Source: Front Oncol. 2021 Jul 13;11:616372. doi: 10.3389/fonc.2021.616372 (PMC8315965; doi:10.3389/fonc.2021.616372)
Supplement: Supplementary file 8 [file Table_6.xlsx]

## Sheet: hsa-miR-30e-5p
#please cite:
#1.Zhou KR, Liu S, Cai L, Bin L, et al. ENCORI: The Encyclopedia of RNA Interactomes.
#2.Li JH, et al.starBase v2.0: decoding miRNA-ceRNA, miRNA-ncRNA and protein-RNA interaction networks from large-scale CLIP-Seq data , Nucleic Acids Res. 2014 Jan;42:D92-7.
miRNAid	miRNAname	geneID	geneName	geneType	chromosome	narrowStart	narrowEnd	broadStart	broadEnd	strand	clipExpNum	degraExpNum	RBP	PITA	RNA22	miRmap	microT	miRanda	PicTar	TargetScan
MIMAT0000692	hsa-miR-30e-5p	ENSG00000160087	UBE2J2	protein_coding	chr1	1190026	1190032	1190025	1190046	-	2	0	AGO2	1	0	0	0	1	0	0	2
MIMAT0000692	hsa-miR-30e-5p	ENSG00000008130	NADK	protein_coding	chr1	1683545	1683551	1683544	1683572	-	4	0	AGO1-4,AGO2	1	0	0	1	1	0	1	4
MIMAT0000692	hsa-miR-30e-5p	ENSG00000198912	C1orf174	protein_coding	chr1	3805752	3805759	3805751	3805779	-	15	0	AGO1-4,AGO2	1	0	0	1	1	0	0	3
MIMAT0000692	hsa-miR-30e-5p	ENSG00000116251	RPL22	protein_coding	chr1	6245317	6245322	6245317	6245322	-	3	0	AGO1,AGO1-4,AGO2	1	0	0	0	0	0	0	1
MIMAT0000692	hsa-miR-30e-5p	ENSG00000116285	ERRFI1	protein_coding	chr1	8071991	8071997	8071990	8072014	-	8	0	AGO1,AGO1-4,AGO2	1	0	0	0	1	0	1	3
MIMAT0000692	hsa-miR-30e-5p	ENSG00000180758	GPR157	protein_coding	chr1	9160633	9160661	9160633	9160661	-	10	0	AGO1,AGO2,AGO3	0	0	0	1	0	0	0	1
MIMAT0000692	hsa-miR-30e-5p	ENSG00000180758	GPR157	protein_coding	chr1	9164136	9164143	9164136	9164164	-	7	0	AGO1-4,AGO2	0	0	0	1	0	0	1	2
MIMAT0000692	hsa-miR-30e-5p	ENSG00000169991	IFFO2	protein_coding	chr1	19230852	19230858	19230851	19230872	-	11	0	AGO1-4,AGO2	0	0	0	0	1	0	1	2
MIMAT0000692	hsa-miR-30e-5p	ENSG00000162545	CAMK2N1	protein_coding	chr1	20809693	20809699	20809692	20809720	-	9	0	AGO1-4,AGO2	1	0	0	1	1	0	1	4
MIMAT0000692	hsa-miR-30e-5p	ENSG00000090686	USP48	protein_coding	chr1	22005612	22005618	22005611	22005639	-	5	0	AGO1-4,AGO2,AGO3	1	0	1	1	1	0	1	5
MIMAT0000692	hsa-miR-30e-5p	ENSG00000090686	USP48	protein_coding	chr1	22032252	22032280	22032252	22032280	-	3	0	AGO1-4,AGO2	0	0	0	1	0	0	0	1
MIMAT0000692	hsa-miR-30e-5p	ENSG00000179163	FUCA1	protein_coding	chr1	24171664	24171670	24171663	24171691	-	15	0	AGO1-4,AGO2	1	0	0	1	1	0	1	4
MIMAT0000692	hsa-miR-30e-5p	ENSG00000188529	SRSF10	protein_coding	chr1	24291790	24291796	24291789	24291817	-	1	0	AGO2	0	0	1	1	0	0	0	2
MIMAT0000692	hsa-miR-30e-5p	ENSG00000188529	SRSF10	protein_coding	chr1	24293188	24293194	24293187	24293215	-	8	1	AGO1,AGO1-4,AGO2	0	0	1	1	1	0	0	3
MIMAT0000692	hsa-miR-30e-5p	ENSG00000188529	SRSF10	protein_coding	chr1	24293646	24293651	24293645	24293673	-	2	0	AGO1,AGO2	0	0	1	1	0	0	1	3
MIMAT0000692	hsa-miR-30e-5p	ENSG00000188529	SRSF10	protein_coding	chr1	24295778	24295783	24295778	24295783	-	1	0	AGO2	0	0	1	0	0	0	0	1
MIMAT0000692	hsa-miR-30e-5p	ENSG00000188529	SRSF10	protein_coding	chr1	24297572	24297577	24297571	24297594	-	6	0	AGO1,AGO2	0	0	1	0	1	0	0	2
MIMAT0000692	hsa-miR-30e-5p	ENSG00000185436	IFNLR1	protein_coding	chr1	24480919	24480925	24480918	24480946	-	2	0	AGO2	1	0	0	1	1	0	1	4
MIMAT0000692	hsa-miR-30e-5p	ENSG00000127423	AUNIP	protein_coding	chr1	26160503	26160509	26160502	26160530	-	6	0	AGO1-4,AGO2	1	0	1	1	1	0	0	4
MIMAT0000692	hsa-miR-30e-5p	ENSG00000198746	GPATCH3	protein_coding	chr1	27216986	27216991	27216986	27216991	-	1	0	AGO1-4	1	0	0	0	0	0	0	1
MIMAT0000692	hsa-miR-30e-5p	ENSG00000117748	RPA2	protein_coding	chr1	28218330	28218337	28218329	28218357	-	16	0	AGO1,AGO1-4,AGO2	1	0	0	1	1	0	0	3
MIMAT0000692	hsa-miR-30e-5p	ENSG00000117748	RPA2	protein_coding	chr1	28233495	28233523	28233495	28233523	-	38	0	AGO1,AGO1-4,AGO2,AGO3,AGO4	0	0	0	1	0	0	0	1
MIMAT0000692	hsa-miR-30e-5p	ENSG00000134644	PUM1	protein_coding	chr1	31405319	31405325	31405318	31405339	-	11	4	AGO1-4,AGO2	1	0	0	0	1	0	0	2
MIMAT0000692	hsa-miR-30e-5p	ENSG00000175130	MARCKSL1	protein_coding	chr1	32799850	32799856	32799849	32799871	-	9	1	AGO1-4,AGO2	1	0	0	0	1	0	0	2
MIMAT0000692	hsa-miR-30e-5p	ENSG00000116525	TRIM62	protein_coding	chr1	33612655	33612661	33612655	33612661	-	2	0	AGO1-4	1	0	0	0	0	0	0	1
MIMAT0000692	hsa-miR-30e-5p	ENSG00000163877	SNIP1	protein_coding	chr1	38002440	38002446	38002439	38002460	-	6	0	AGO1-4,AGO2	1	0	0	0	1	0	0	2
MIMAT0000692	hsa-miR-30e-5p	ENSG00000188786	MTF1	protein_coding	chr1	38276649	38276654	38276648	38276654	-	2	0	AGO1-4,AGO2	1	0	0	0	0	0	1	2
MIMAT0000692	hsa-miR-30e-5p	ENSG00000196517	SLC6A9	protein_coding	chr1	44463042	44463047	44463041	44463069	-	11	0	AGO1,AGO1-4,AGO2	1	0	0	1	1	1	1	5
MIMAT0000692	hsa-miR-30e-5p	ENSG00000126107	HECTD3	protein_coding	chr1	45468301	45468306	45468301	45468306	-	5	0	AGO1-4,AGO2	1	0	0	0	0	0	0	1
MIMAT0000692	hsa-miR-30e-5p	ENSG00000117461	PIK3R3	protein_coding	chr1	46506066	46506071	46506066	46506071	-	6	0	AGO1-4,AGO2	1	0	1	0	0	0	0	2
MIMAT0000692	hsa-miR-30e-5p	ENSG00000117461	PIK3R3	protein_coding	chr1	46507625	46507630	46507625	46507630	-	3	0	AGO1-4,AGO2	1	0	1	0	0	0	0	2
MIMAT0000692	hsa-miR-30e-5p	ENSG00000159658	EFCAB14	protein_coding	chr1	47141504	47141511	47141503	47141531	-	7	0	AGO1,AGO1-4,AGO2	1	0	0	1	1	0	0	3
MIMAT0000692	hsa-miR-30e-5p	ENSG00000085831	TTC39A	protein_coding	chr1	51753541	51753562	51753541	51753562	-	3	0	AGO1-4	0	0	0	0	1	0	0	1
MIMAT0000692	hsa-miR-30e-5p	ENSG00000117862	TXNDC12	protein_coding	chr1	52486304	52486311	52486303	52486322	-	14	0	AGO1,AGO1-4,AGO2,AGO3	1	0	0	0	1	0	0	2
MIMAT0000692	hsa-miR-30e-5p	ENSG00000134744	ZCCHC11	protein_coding	chr1	52991579	52991607	52991579	52991607	-	1	0	AGO2	0	0	0	1	0	0	0	1
MIMAT0000692	hsa-miR-30e-5p	ENSG00000162377	COA7	protein_coding	chr1	53152913	53152918	53152913	53152918	-	2	0	AGO2	1	0	0	0	0	0	0	1
MIMAT0000692	hsa-miR-30e-5p	ENSG00000162384	C1orf123	protein_coding	chr1	53680010	53680015	53680010	53680015	-	9	0	AGO1,AGO2	1	0	0	0	0	0	0	1
MIMAT0000692	hsa-miR-30e-5p	ENSG00000157193	LRP8	protein_coding	chr1	53711249	53711254	53711249	53711254	-	8	0	AGO1,AGO1-4,AGO2	1	0	1	0	0	0	0	2
MIMAT0000692	hsa-miR-30e-5p	ENSG00000157193	LRP8	protein_coding	chr1	53711554	53711559	53711554	53711559	-	1	0	AGO2	1	0	1	0	0	0	0	2
MIMAT0000692	hsa-miR-30e-5p	ENSG00000162601	MYSM1	protein_coding	chr1	59123021	59123028	59123021	59123028	-	7	0	AGO1-4,AGO2	0	0	0	0	0	0	1	1
MIMAT0000692	hsa-miR-30e-5p	ENSG00000177606	JUN	protein_coding	chr1	59247084	59247089	59247083	59247104	-	17	0	AGO1-4,AGO2,AGO3	1	0	0	0	1	0	0	2
MIMAT0000692	hsa-miR-30e-5p	ENSG00000116641	DOCK7	protein_coding	chr1	62920687	62920693	62920686	62920714	-	1	0	AGO2	1	0	0	1	1	0	1	4
MIMAT0000692	hsa-miR-30e-5p	ENSG00000116641	DOCK7	protein_coding	chr1	62943418	62943446	62943418	62943446	-	1	0	AGO1-4	0	0	0	1	0	0	0	1
MIMAT0000692	hsa-miR-30e-5p	ENSG00000116641	DOCK7	protein_coding	chr1	62954703	62954731	62954703	62954731	-	1	0	AGO1-4	0	0	0	1	0	0	0	1
MIMAT0000692	hsa-miR-30e-5p	ENSG00000116641	DOCK7	protein_coding	chr1	62979459	62979487	62979459	62979487	-	4	0	AGO1-4,AGO2	0	0	0	1	0	0	0	1
MIMAT0000692	hsa-miR-30e-5p	ENSG00000162434	JAK1	protein_coding	chr1	65298944	65298950	65298943	65298964	-	35	0	AGO1,AGO1-4,AGO2,AGO3	1	0	0	0	1	0	1	3
MIMAT0000692	hsa-miR-30e-5p	ENSG00000066557	LRRC40	protein_coding	chr1	70610696	70610702	70610695	70610723	-	5	0	AGO2	1	0	0	1	1	0	1	4
MIMAT0000692	hsa-miR-30e-5p	ENSG00000132485	ZRANB2	protein_coding	chr1	71529129	71529134	71529128	71529156	-	5	0	AGO1-4,AGO2	1	0	0	1	1	0	0	3
MIMAT0000692	hsa-miR-30e-5p	ENSG00000132485	ZRANB2	protein_coding	chr1	71530024	71530044	71530024	71530052	-	2	0	AGO1-4,AGO2	0	0	0	1	1	0	0	2
MIMAT0000692	hsa-miR-30e-5p	ENSG00000172260	NEGR1	protein_coding	chr1	71872792	71872797	71872791	71872819	-	2	0	AGO2	1	0	0	1	0	0	1	3
MIMAT0000692	hsa-miR-30e-5p	ENSG00000137968	SLC44A5	protein_coding	chr1	75668801	75668806	75668801	75668806	-	2	0	AGO2	0	0	1	0	0	0	0	1
MIMAT0000692	hsa-miR-30e-5p	ENSG00000137941	TTLL7	protein_coding	chr1	84331783	84331788	84331782	84331810	-	1	0	AGO2	0	0	1	1	0	0	0	2
MIMAT0000692	hsa-miR-30e-5p	ENSG00000137941	TTLL7	protein_coding	chr1	84335386	84335392	84335385	84335413	-	3	0	AGO2	1	0	1	1	1	0	1	5
MIMAT0000692	hsa-miR-30e-5p	ENSG00000137941	TTLL7	protein_coding	chr1	84335666	84335694	84335666	84335694	-	3	0	AGO1-4,AGO2	0	0	0	1	0	0	0	1
MIMAT0000692	hsa-miR-30e-5p	ENSG00000137941	TTLL7	protein_coding	chr1	84403589	84403617	84403589	84403617	-	1	0	AGO2	0	0	0	1	0	0	0	1
MIMAT0000692	hsa-miR-30e-5p	ENSG00000117155	SSX2IP	protein_coding	chr1	85112515	85112521	85112514	85112542	-	4	0	AGO2	1	0	0	1	1	0	1	4
MIMAT0000692	hsa-miR-30e-5p	ENSG00000142867	BCL10	protein_coding	chr1	85733222	85733228	85733221	85733249	-	14	0	AGO1,AGO1-4,AGO2,AGO3	1	0	0	1	1	0	0	3
MIMAT0000692	hsa-miR-30e-5p	ENSG00000153904	DDAH1	protein_coding	chr1	85787015	85787021	85787014	85787042	-	31	0	AGO1,AGO1-4,AGO2	1	0	1	1	1	0	1	5
MIMAT0000692	hsa-miR-30e-5p	ENSG00000183291	SELENOF	protein_coding	chr1	87328649	87328654	87328648	87328669	-	10	0	AGO1,AGO1-4,AGO2	1	0	0	0	1	0	0	2
MIMAT0000692	hsa-miR-30e-5p	ENSG00000117226	GBP3	protein_coding	chr1	89473288	89473293	89473287	89473308	-	1	0	AGO2	1	0	0	0	1	0	0	2
MIMAT0000692	hsa-miR-30e-5p	ENSG00000117228	GBP1	protein_coding	chr1	89518095	89518101	89518094	89518115	-	1	0	AGO2	1	0	0	0	1	0	0	2
MIMAT0000692	hsa-miR-30e-5p	ENSG00000122482	ZNF644	protein_coding	chr1	91381317	91381323	91381316	91381344	-	9	4	AGO1-4,AGO2	1	0	0	1	1	0	1	4
MIMAT0000692	hsa-miR-30e-5p	ENSG00000122482	ZNF644	protein_coding	chr1	91383622	91383650	91383622	91383650	-	18	0	AGO1,AGO1-4,AGO2	0	0	0	1	0	0	0	1
MIMAT0000692	hsa-miR-30e-5p	ENSG00000067208	EVI5	protein_coding	chr1	92974298	92974304	92974297	92974325	-	3	0	AGO1-4,AGO2	1	0	0	1	1	0	1	4
MIMAT0000692	hsa-miR-30e-5p	ENSG00000154511	FAM69A	protein_coding	chr1	93307779	93307785	93307778	93307799	-	1	0	AGO2	0	0	1	0	1	0	0	2
MIMAT0000692	hsa-miR-30e-5p	ENSG00000154511	FAM69A	protein_coding	chr1	93308434	93308439	93308433	93308457	-	3	0	AGO2	0	0	1	0	1	0	0	2
MIMAT0000692	hsa-miR-30e-5p	ENSG00000023909	GCLM	protein_coding	chr1	94352885	94352890	94352885	94352890	-	1	0	AGO2	1	0	1	0	0	0	0	2
MIMAT0000692	hsa-miR-30e-5p	ENSG00000137962	ARHGAP29	protein_coding	chr1	94638860	94638867	94638859	94638887	-	10	0	AGO1-4,AGO2	1	0	0	1	1	0	0	3
MIMAT0000692	hsa-miR-30e-5p	ENSG00000137962	ARHGAP29	protein_coding	chr1	94655578	94655606	94655578	94655606	-	8	0	AGO1-4,AGO2	0	0	0	1	0	0	0	1
MIMAT0000692	hsa-miR-30e-5p	ENSG00000137962	ARHGAP29	protein_coding	chr1	94668737	94668765	94668737	94668765	-	2	0	AGO1-4	0	0	0	1	0	0	0	1
MIMAT0000692	hsa-miR-30e-5p	ENSG00000137992	DBT	protein_coding	chr1	100652623	100652629	100652623	100652629	-	1	0	AGO2	1	0	0	0	0	0	0	1
MIMAT0000692	hsa-miR-30e-5p	ENSG00000162694	EXTL2	protein_coding	chr1	101338292	101338298	101338291	101338319	-	2	0	AGO2	1	0	1	1	1	0	0	4
MIMAT0000692	hsa-miR-30e-5p	ENSG00000162694	EXTL2	protein_coding	chr1	101339240	101339246	101339239	101339267	-	15	0	AGO1,AGO1-4,AGO2	1	0	1	1	1	0	1	5
MIMAT0000692	hsa-miR-30e-5p	ENSG00000134215	VAV3	protein_coding	chr1	108115105	108115111	108115104	108115132	-	4	0	AGO1-4,AGO2	1	0	0	1	1	0	1	4
MIMAT0000692	hsa-miR-30e-5p	ENSG00000085491	SLC25A24	protein_coding	chr1	108678922	108678927	108678922	108678927	-	6	0	AGO1-4,AGO2	1	0	0	0	0	0	0	1
MIMAT0000692	hsa-miR-30e-5p	ENSG00000121940	CLCC1	protein_coding	chr1	109474526	109474532	109474525	109474544	-	9	0	AGO1-4,AGO2	1	0	0	0	1	0	1	3
MIMAT0000692	hsa-miR-30e-5p	ENSG00000085433	WDR47	protein_coding	chr1	109513754	109513760	109513753	109513773	-	2	0	AGO1-4,AGO2	1	0	0	0	1	0	1	3
MIMAT0000692	hsa-miR-30e-5p	ENSG00000081019	RSBN1	protein_coding	chr1	114305451	114305457	114305450	114305471	-	3	0	AGO1-4,AGO2	1	0	0	0	1	0	0	2
MIMAT0000692	hsa-miR-30e-5p	ENSG00000197323	TRIM33	protein_coding	chr1	114936333	114936338	114936332	114936338	-	1	0	AGO1-4	1	0	0	0	0	0	1	2
MIMAT0000692	hsa-miR-30e-5p	ENSG00000175984	DENND2C	protein_coding	chr1	115125506	115125513	115125506	115125534	-	1	0	AGO1-4	0	0	0	1	0	0	1	2
MIMAT0000692	hsa-miR-30e-5p	ENSG00000052723	SIKE1	protein_coding	chr1	115315760	115315765	115315759	115315787	-	7	0	AGO1-4,AGO2	1	0	0	1	0	0	0	2
MIMAT0000692	hsa-miR-30e-5p	ENSG00000052723	SIKE1	protein_coding	chr1	115315945	115315951	115315944	115315972	-	12	0	AGO1,AGO1-4,AGO2	1	0	0	1	1	0	0	3
MIMAT0000692	hsa-miR-30e-5p	ENSG00000143061	IGSF3	protein_coding	chr1	117119566	117119571	117119566	117119571	-	4	0	AGO1-4,AGO2	1	0	0	0	0	0	0	1
MIMAT0000692	hsa-miR-30e-5p	ENSG00000134250	NOTCH2	protein_coding	chr1	120455933	120455938	120455932	120455960	-	9	0	AGO1-4,AGO2	1	0	0	1	0	0	0	2
MIMAT0000692	hsa-miR-30e-5p	ENSG00000134250	NOTCH2	protein_coding	chr1	120457307	120457312	120457306	120457334	-	5	0	AGO1-4	1	0	0	1	0	0	0	2
MIMAT0000692	hsa-miR-30e-5p	ENSG00000134250	NOTCH2	protein_coding	chr1	120457666	120457673	120457665	120457693	-	6	0	AGO1,AGO1-4,AGO2	1	0	0	1	1	0	0	3
MIMAT0000692	hsa-miR-30e-5p	ENSG00000134250	NOTCH2	protein_coding	chr1	120547953	120547981	120547953	120547981	-	6	0	AGO1-4	0	0	0	1	0	0	0	1
MIMAT0000692	hsa-miR-30e-5p	ENSG00000134250	NOTCH2	protein_coding	chr1	120548076	120548104	120548076	120548104	-	6	0	AGO1-4	0	0	0	1	0	0	0	1
MIMAT0000692	hsa-miR-30e-5p	ENSG00000178104	PDE4DIP	protein_coding	chr1	144898581	144898609	144898581	144898609	-	2	0	AGO2	0	0	0	1	0	0	0	1
MIMAT0000692	hsa-miR-30e-5p	ENSG00000203832	NBPF20	protein_coding	chr1	148255183	148255211	148255183	148255211	-	10	0	AGO1-4	0	0	0	1	0	0	0	1
MIMAT0000692	hsa-miR-30e-5p	ENSG00000203832	NBPF20	protein_coding	chr1	148259947	148259975	148259947	148259975	-	8	0	AGO1-4	0	0	0	1	0	0	0	1
MIMAT0000692	hsa-miR-30e-5p	ENSG00000203832	NBPF20	protein_coding	chr1	148264707	148264735	148264707	148264735	-	10	0	AGO1-4	0	0	0	1	0	0	0	1
MIMAT0000692	hsa-miR-30e-5p	ENSG00000203832	NBPF20	protein_coding	chr1	148269479	148269507	148269479	148269507	-	11	0	AGO1-4	0	0	0	1	0	0	0	1
MIMAT0000692	hsa-miR-30e-5p	ENSG00000203832	NBPF20	protein_coding	chr1	148274251	148274279	148274251	148274279	-	11	0	AGO1-4	0	0	0	1	0	0	0	1
MIMAT0000692	hsa-miR-30e-5p	ENSG00000203832	NBPF20	protein_coding	chr1	148279013	148279041	148279013	148279041	-	8	0	AGO1-4	0	0	0	1	0	0	0	1
MIMAT0000692	hsa-miR-30e-5p	ENSG00000203832	NBPF20	protein_coding	chr1	148282206	148282234	148282206	148282234	-	9	0	AGO1-4	0	0	0	1	0	0	0	1
MIMAT0000692	hsa-miR-30e-5p	ENSG00000203832	NBPF20	protein_coding	chr1	148285399	148285427	148285399	148285427	-	13	0	AGO1-4	0	0	0	1	0	0	0	1
MIMAT0000692	hsa-miR-30e-5p	ENSG00000203832	NBPF20	protein_coding	chr1	148288592	148288620	148288592	148288620	-	10	0	AGO1-4	0	0	0	1	0	0	0	1
MIMAT0000692	hsa-miR-30e-5p	ENSG00000203832	NBPF20	protein_coding	chr1	148293362	148293390	148293362	148293390	-	11	0	AGO1-4	0	0	0	1	0	0	0	1
MIMAT0000692	hsa-miR-30e-5p	ENSG00000203832	NBPF20	protein_coding	chr1	148298132	148298160	148298132	148298160	-	9	0	AGO1-4	0	0	0	1	0	0	0	1
MIMAT0000692	hsa-miR-30e-5p	ENSG00000203832	NBPF20	protein_coding	chr1	148302892	148302920	148302892	148302920	-	10	0	AGO1-4	0	0	0	1	0	0	0	1
MIMAT0000692	hsa-miR-30e-5p	ENSG00000203832	NBPF20	protein_coding	chr1	148307662	148307690	148307662	148307690	-	10	0	AGO1-4	0	0	0	1	0	0	0	1
MIMAT0000692	hsa-miR-30e-5p	ENSG00000203832	NBPF20	protein_coding	chr1	148312428	148312456	148312428	148312456	-	9	0	AGO1-4	0	0	0	1	0	0	0	1
MIMAT0000692	hsa-miR-30e-5p	ENSG00000203832	NBPF20	protein_coding	chr1	148317196	148317224	148317196	148317224	-	11	0	AGO1-4	0	0	0	1	0	0	0	1
MIMAT0000692	hsa-miR-30e-5p	ENSG00000203832	NBPF20	protein_coding	chr1	148321948	148321976	148321948	148321976	-	8	0	AGO1-4	0	0	0	1	0	0	0	1
MIMAT0000692	hsa-miR-30e-5p	ENSG00000203832	NBPF20	protein_coding	chr1	148326718	148326746	148326718	148326746	-	10	0	AGO1-4	0	0	0	1	0	0	0	1
MIMAT0000692	hsa-miR-30e-5p	ENSG00000197622	CDC42SE1	protein_coding	chr1	151025194	151025200	151025193	151025214	-	7	0	AGO1-4,AGO2	1	0	0	0	1	0	0	2
MIMAT0000692	hsa-miR-30e-5p	ENSG00000182134	TDRKH	protein_coding	chr1	151744246	151744252	151744245	151744266	-	2	0	AGO1-4	1	0	0	0	1	0	0	2
MIMAT0000692	hsa-miR-30e-5p	ENSG00000160803	UBQLN4	protein_coding	chr1	156006367	156006373	156006366	156006394	-	3	0	AGO1-4,AGO2	1	0	1	1	1	0	0	4
MIMAT0000692	hsa-miR-30e-5p	ENSG00000160803	UBQLN4	protein_coding	chr1	156006416	156006421	156006416	156006421	-	1	0	AGO2	1	0	1	0	0	0	0	2
MIMAT0000692	hsa-miR-30e-5p	ENSG00000116604	MEF2D	protein_coding	chr1	156433551	156433556	156433550	156433578	-	7	0	AGO1-4,AGO2	1	0	0	1	1	0	0	3
MIMAT0000692	hsa-miR-30e-5p	ENSG00000116604	MEF2D	protein_coding	chr1	156435315	156435321	156435314	156435342	-	5	0	AGO1-4,AGO2	1	0	0	1	0	0	1	3
MIMAT0000692	hsa-miR-30e-5p	ENSG00000132693	CRP	protein_coding	chr1	159682082	159682105	159682082	159682105	-	1	0	AGO1-4	0	0	0	0	1	0	0	1
MIMAT0000692	hsa-miR-30e-5p	ENSG00000186517	ARHGAP30	protein_coding	chr1	161017336	161017341	161017336	161017341	-	1	0	AGO1-4	1	0	0	0	0	0	0	1
MIMAT0000692	hsa-miR-30e-5p	ENSG00000143217	NECTIN4	protein_coding	chr1	161041451	161041469	161041451	161041469	-	1	0	AGO1-4	0	0	0	0	1	0	0	1
MIMAT0000692	hsa-miR-30e-5p	ENSG00000143149	ALDH9A1	protein_coding	chr1	165632223	165632229	165632223	165632229	-	4	0	AGO1-4,AGO2	1	0	0	0	0	0	0	1
MIMAT0000692	hsa-miR-30e-5p	ENSG00000143183	TMCO1	protein_coding	chr1	165693657	165693677	165693657	165693677	-	1	0	AGO1-4	0	0	0	0	1	0	0	1
MIMAT0000692	hsa-miR-30e-5p	ENSG00000143162	CREG1	protein_coding	chr1	167510717	167510722	167510716	167510744	-	1	0	AGO2	1	0	1	1	0	0	0	3
MIMAT0000692	hsa-miR-30e-5p	ENSG00000143162	CREG1	protein_coding	chr1	167511377	167511383	167511376	167511404	-	9	0	AGO1-4,AGO2	1	0	1	1	1	0	0	4
MIMAT0000692	hsa-miR-30e-5p	ENSG00000143162	CREG1	protein_coding	chr1	167511389	167511395	167511388	167511416	-	9	0	AGO1-4,AGO2	1	0	1	1	1	0	0	4
MIMAT0000692	hsa-miR-30e-5p	ENSG00000000457	SCYL3	protein_coding	chr1	169822376	169822382	169822375	169822403	-	6	0	AGO1-4,AGO2	1	0	0	1	1	0	1	4
MIMAT0000692	hsa-miR-30e-5p	ENSG00000135870	RC3H1	protein_coding	chr1	173903102	173903108	173903102	173903108	-	2	0	AGO1-4	1	0	0	0	0	0	0	1
MIMAT0000692	hsa-miR-30e-5p	ENSG00000135870	RC3H1	protein_coding	chr1	173903987	173903992	173903987	173903992	-	1	0	AGO1-4	1	0	0	0	0	0	0	1
MIMAT0000692	hsa-miR-30e-5p	ENSG00000235750	KIAA0040	protein_coding	chr1	175128878	175128897	175128878	175128897	-	1	0	AGO1-4	0	0	0	0	1	0	0	1
MIMAT0000692	hsa-miR-30e-5p	ENSG00000143322	ABL2	protein_coding	chr1	179070042	179070048	179070041	179070069	-	3	0	AGO2	1	0	0	1	0	1	0	3
MIMAT0000692	hsa-miR-30e-5p	ENSG00000143322	ABL2	protein_coding	chr1	179076703	179076708	179076702	179076730	-	5	0	AGO1-4,AGO2	1	0	0	1	0	1	1	4
MIMAT0000692	hsa-miR-30e-5p	ENSG00000135823	STX6	protein_coding	chr1	180943987	180943993	180943986	180944007	-	10	0	AGO1-4,AGO2	1	0	0	0	1	0	1	3
MIMAT0000692	hsa-miR-30e-5p	ENSG00000162704	ARPC5	protein_coding	chr1	183595611	183595617	183595610	183595638	-	7	6	AGO1-4,AGO2	1	0	1	1	1	0	0	4
MIMAT0000692	hsa-miR-30e-5p	ENSG00000116406	EDEM3	protein_coding	chr1	184660471	184660477	184660470	184660498	-	8	0	AGO1-4,AGO2	1	0	1	1	1	0	1	5
MIMAT0000692	hsa-miR-30e-5p	ENSG00000116406	EDEM3	protein_coding	chr1	184660569	184660575	184660568	184660596	-	20	0	AGO1,AGO1-4,AGO2	1	0	1	1	1	0	1	5
MIMAT0000692	hsa-miR-30e-5p	ENSG00000047410	TPR	protein_coding	chr1	186282264	186282269	186282264	186282269	-	1	0	AGO1-4	1	0	0	0	0	0	0	1
MIMAT0000692	hsa-miR-30e-5p	ENSG00000177888	ZBTB41	protein_coding	chr1	197123617	197123623	197123617	197123623	-	3	0	AGO1-4,AGO2	1	0	0	0	0	0	0	1
MIMAT0000692	hsa-miR-30e-5p	ENSG00000177888	ZBTB41	protein_coding	chr1	197126278	197126283	197126278	197126283	-	11	0	AGO1-4,AGO2	1	0	0	0	0	0	0	1
MIMAT0000692	hsa-miR-30e-5p	ENSG00000177888	ZBTB41	protein_coding	chr1	197127070	197127076	197127069	197127091	-	5	0	AGO2	1	0	0	0	1	0	1	3
MIMAT0000692	hsa-miR-30e-5p	ENSG00000177888	ZBTB41	protein_coding	chr1	197128334	197128340	197128334	197128340	-	5	0	AGO1-4,AGO2	1	0	0	0	0	0	1	2
MIMAT0000692	hsa-miR-30e-5p	ENSG00000213047	DENND1B	protein_coding	chr1	197478871	197478877	197478870	197478898	-	1	0	AGO1-4	1	0	0	1	0	0	0	2
MIMAT0000692	hsa-miR-30e-5p	ENSG00000213047	DENND1B	protein_coding	chr1	197509144	197509172	197509144	197509172	-	2	0	AGO2	0	0	0	1	0	0	0	1
MIMAT0000692	hsa-miR-30e-5p	ENSG00000116852	KIF21B	protein_coding	chr1	200940617	200940623	200940616	200940623	-	2	0	AGO1-4,AGO2	1	0	0	0	0	0	1	2
MIMAT0000692	hsa-miR-30e-5p	ENSG00000117139	KDM5B	protein_coding	chr1	202697726	202697732	202697725	202697746	-	4	0	AGO1-4,AGO2	1	0	0	0	1	0	1	3
MIMAT0000692	hsa-miR-30e-5p	ENSG00000183155	RABIF	protein_coding	chr1	202849347	202849353	202849347	202849353	-	1	0	AGO2	1	0	0	0	0	0	0	1
MIMAT0000692	hsa-miR-30e-5p	ENSG00000133048	CHI3L1	protein_coding	chr1	203148307	203148314	203148306	203148334	-	1	0	AGO1-4	1	0	0	1	1	0	0	3
MIMAT0000692	hsa-miR-30e-5p	ENSG00000143845	ETNK2	protein_coding	chr1	204100965	204100971	204100964	204100985	-	1	0	AGO1-4	1	0	0	0	1	0	0	2
MIMAT0000692	hsa-miR-30e-5p	ENSG00000158615	PPP1R15B	protein_coding	chr1	204373774	204373779	204373774	204373779	-	18	0	AGO1,AGO1-4,AGO2	1	0	0	0	0	0	0	1
MIMAT0000692	hsa-miR-30e-5p	ENSG00000133056	PIK3C2B	protein_coding	chr1	204391837	204391843	204391836	204391857	-	9	0	AGO1-4,AGO2	1	0	0	0	1	0	0	2
MIMAT0000692	hsa-miR-30e-5p	ENSG00000133059	DSTYK	protein_coding	chr1	205115542	205115548	205115541	205115569	-	5	0	AGO2	1	0	1	1	1	0	0	4
MIMAT0000692	hsa-miR-30e-5p	ENSG00000133059	DSTYK	protein_coding	chr1	205116091	205116097	205116090	205116118	-	6	0	AGO1-4,AGO2	1	0	1	1	1	0	1	5
MIMAT0000692	hsa-miR-30e-5p	ENSG00000158711	ELK4	protein_coding	chr1	205583161	205583189	205583161	205583189	-	11	0	AGO1-4,AGO2	0	0	0	1	0	0	0	1
MIMAT0000692	hsa-miR-30e-5p	ENSG00000158711	ELK4	protein_coding	chr1	205585054	205585082	205585054	205585082	-	1	0	AGO1-4	0	0	0	1	0	0	0	1
MIMAT0000692	hsa-miR-30e-5p	ENSG00000069275	NUCKS1	protein_coding	chr1	205682025	205682031	205682024	205682052	-	3	0	AGO2	0	0	1	1	1	0	0	3
MIMAT0000692	hsa-miR-30e-5p	ENSG00000069275	NUCKS1	protein_coding	chr1	205683170	205683176	205683169	205683197	-	20	0	AGO1,AGO1-4,AGO2	0	0	1	1	1	0	1	4
MIMAT0000692	hsa-miR-30e-5p	ENSG00000069275	NUCKS1	protein_coding	chr1	205684131	205684136	205684130	205684158	-	15	0	AGO1,AGO1-4,AGO2	0	0	1	1	0	0	0	2
MIMAT0000692	hsa-miR-30e-5p	ENSG00000069275	NUCKS1	protein_coding	chr1	205684797	205684802	205684796	205684824	-	29	0	AGO1-4,AGO2	0	0	1	1	0	0	0	2
MIMAT0000692	hsa-miR-30e-5p	ENSG00000069275	NUCKS1	protein_coding	chr1	205685767	205685772	205685767	205685772	-	12	0	AGO1-4,AGO2	0	0	1	0	0	0	0	1
MIMAT0000692	hsa-miR-30e-5p	ENSG00000133065	SLC41A1	protein_coding	chr1	205758350	205758355	205758350	205758355	-	7	0	AGO1-4,AGO2	1	0	0	0	0	0	0	1
MIMAT0000692	hsa-miR-30e-5p	ENSG00000180667	YOD1	protein_coding	chr1	207217686	207217692	207217685	207217713	-	11	0	AGO1,AGO1-4,AGO2	1	0	1	1	0	0	1	4
MIMAT0000692	hsa-miR-30e-5p	ENSG00000180667	YOD1	protein_coding	chr1	207218836	207218841	207218835	207218863	-	12	0	AGO1,AGO2,AGO3	1	0	1	1	0	0	1	4
MIMAT0000692	hsa-miR-30e-5p	ENSG00000180667	YOD1	protein_coding	chr1	207220037	207220043	207220036	207220064	-	5	0	AGO1,AGO2	1	0	1	1	1	0	1	5
MIMAT0000692	hsa-miR-30e-5p	ENSG00000180667	YOD1	protein_coding	chr1	207222186	207222191	207222185	207222213	-	14	0	AGO1,AGO1-4,AGO2	1	0	1	1	0	0	1	4
MIMAT0000692	hsa-miR-30e-5p	ENSG00000076356	PLXNA2	protein_coding	chr1	208199418	208199424	208199417	208199445	-	3	0	AGO2	1	0	0	1	1	0	1	4
MIMAT0000692	hsa-miR-30e-5p	ENSG00000076356	PLXNA2	protein_coding	chr1	208383675	208383703	208383675	208383703	-	1	0	AGO1-4	0	0	0	1	0	0	0	1
MIMAT0000692	hsa-miR-30e-5p	ENSG00000170385	SLC30A1	protein_coding	chr1	211748079	211748107	211748079	211748107	-	4	0	AGO1-4,AGO2	0	0	0	1	0	0	0	1
MIMAT0000692	hsa-miR-30e-5p	ENSG00000170385	SLC30A1	protein_coding	chr1	211748125	211748153	211748125	211748153	-	5	1	AGO1,AGO1-4,AGO2	0	0	0	1	0	0	0	1
MIMAT0000692	hsa-miR-30e-5p	ENSG00000123684	LPGAT1	protein_coding	chr1	211918595	211918601	211918594	211918622	-	2	0	AGO1-4,AGO2	1	0	1	1	0	0	1	4
MIMAT0000692	hsa-miR-30e-5p	ENSG00000123684	LPGAT1	protein_coding	chr1	211921541	211921546	211921540	211921568	-	6	0	AGO1-4,AGO2	1	0	1	1	0	0	0	3
MIMAT0000692	hsa-miR-30e-5p	ENSG00000123684	LPGAT1	protein_coding	chr1	211922594	211922600	211922593	211922621	-	11	0	AGO1-4,AGO2	1	0	1	1	0	0	1	4
MIMAT0000692	hsa-miR-30e-5p	ENSG00000117697	NSL1	protein_coding	chr1	212911335	212911340	212911335	212911340	-	2	0	AGO1-4,AGO2	1	0	0	0	0	0	0	1
MIMAT0000692	hsa-miR-30e-5p	ENSG00000196660	SLC30A10	protein_coding	chr1	220088146	220088153	220088145	220088166	-	1	0	AGO1-4	1	0	0	0	1	0	0	2
MIMAT0000692	hsa-miR-30e-5p	ENSG00000186063	AIDA	protein_coding	chr1	222842861	222842866	222842860	222842888	-	4	0	AGO1,AGO2	1	0	1	1	0	0	1	4
MIMAT0000692	hsa-miR-30e-5p	ENSG00000143514	TP53BP2	protein_coding	chr1	223967781	223967787	223967780	223967801	-	1	0	AGO2	1	0	0	0	1	0	0	2
MIMAT0000692	hsa-miR-30e-5p	ENSG00000162923	WDR26	protein_coding	chr1	224573062	224573079	224573051	224573090	-	6	2	AGO1,AGO1-4,AGO2	0	0	0	2	1	0	0	3
MIMAT0000692	hsa-miR-30e-5p	ENSG00000162923	WDR26	protein_coding	chr1	224606076	224606082	224606076	224606104	-	1	1	AGO1-4	0	0	0	1	0	0	1	2
MIMAT0000692	hsa-miR-30e-5p	ENSG00000143815	LBR	protein_coding	chr1	225590830	225590836	225590829	225590851	-	16	0	AGO1,AGO1-4,AGO2,AGO3,AGO4	1	0	0	0	1	0	0	2
MIMAT0000692	hsa-miR-30e-5p	ENSG00000154380	ENAH	protein_coding	chr1	225682401	225682406	225682400	225682406	-	4	0	AGO1,AGO2	1	0	0	0	0	0	1	2
MIMAT0000692	hsa-miR-30e-5p	ENSG00000243709	LEFTY1	protein_coding	chr1	226074119	226074125	226074118	226074140	-	1	0	AGO1-4	1	0	0	0	1	0	0	2
MIMAT0000692	hsa-miR-30e-5p	ENSG00000182827	ACBD3	protein_coding	chr1	226334211	226334216	226334211	226334216	-	6	0	AGO1,AGO1-4,AGO2	1	0	0	0	0	0	0	1
MIMAT0000692	hsa-miR-30e-5p	ENSG00000135776	ABCB10	protein_coding	chr1	229653539	229653544	229653539	229653544	-	4	0	AGO2	1	0	0	0	0	0	0	1
MIMAT0000692	hsa-miR-30e-5p	ENSG00000143633	C1orf131	protein_coding	chr1	231359676	231359681	231359675	231359696	-	5	0	AGO1-4,AGO2	1	0	1	0	1	0	0	3
MIMAT0000692	hsa-miR-30e-5p	ENSG00000168264	IRF2BP2	protein_coding	chr1	234740286	234740291	234740285	234740313	-	9	0	AGO1,AGO1-4,AGO2	1	0	0	1	1	1	1	5
MIMAT0000692	hsa-miR-30e-5p	ENSG00000168264	IRF2BP2	protein_coding	chr1	234742357	234742362	234742356	234742384	-	9	0	AGO1,AGO1-4,AGO2	1	0	0	1	0	0	0	2
MIMAT0000692	hsa-miR-30e-5p	ENSG00000173726	TOMM20	protein_coding	chr1	235275245	235275252	235275244	235275272	-	7	0	AGO1-4,AGO2	1	0	0	1	1	0	0	3
MIMAT0000692	hsa-miR-30e-5p	ENSG00000054267	ARID4B	protein_coding	chr1	235331248	235331253	235331247	235331275	-	10	0	AGO1-4,AGO2	1	0	0	1	1	1	1	5
MIMAT0000692	hsa-miR-30e-5p	ENSG00000054267	ARID4B	protein_coding	chr1	235338517	235338545	235338517	235338545	-	4	0	AGO1-4	0	0	0	1	0	0	0	1
MIMAT0000692	hsa-miR-30e-5p	ENSG00000143669	LYST	protein_coding	chr1	235825827	235825832	235825827	235825832	-	1	0	AGO2	1	0	0	0	0	0	0	1
MIMAT0000692	hsa-miR-30e-5p	ENSG00000116962	NID1	protein_coding	chr1	236139176	236139181	236139175	236139203	-	16	0	AGO1-4,AGO2	1	0	0	1	0	0	1	3
MIMAT0000692	hsa-miR-30e-5p	ENSG00000086619	ERO1B	protein_coding	chr1	236379960	236379980	236379960	236379980	-	2	0	AGO1-4,AGO2	0	0	0	0	1	0	0	1
MIMAT0000692	hsa-miR-30e-5p	ENSG00000180875	GREM2	protein_coding	chr1	240653926	240653931	240653926	240653931	-	3	0	AGO1-4,AGO2	1	0	0	0	0	0	0	1
MIMAT0000692	hsa-miR-30e-5p	ENSG00000143702	CEP170	protein_coding	chr1	243287889	243287917	243287889	243287917	-	2	0	AGO2	0	0	0	1	0	0	0	1
MIMAT0000692	hsa-miR-30e-5p	ENSG00000143702	CEP170	protein_coding	chr1	243289144	243289149	243289143	243289171	-	2	0	AGO1-4,AGO2	1	0	0	1	0	0	0	2
MIMAT0000692	hsa-miR-30e-5p	ENSG00000175137	SH3BP5L	protein_coding	chr1	249105211	249105217	249105210	249105231	-	8	0	AGO1-4,AGO2	1	0	0	0	1	0	0	2
MIMAT0000692	hsa-miR-30e-5p	ENSG00000197785	ATAD3A	protein_coding	chr1	1470034	1470040	1470019	1470041	+	1	0	AGO2	1	0	0	0	1	0	0	2
MIMAT0000692	hsa-miR-30e-5p	ENSG00000157916	RER1	protein_coding	chr1	2335681	2335687	2335668	2335688	+	2	0	AGO1,AGO2	1	0	0	0	1	0	0	2
MIMAT0000692	hsa-miR-30e-5p	ENSG00000157870	FAM213B	protein_coding	chr1	2522035	2522041	2522035	2522041	+	1	0	AGO1-4	1	0	0	0	0	0	0	1
MIMAT0000692	hsa-miR-30e-5p	ENSG00000142611	PRDM16	protein_coding	chr1	3352009	3352014	3352009	3352014	+	1	0	AGO1-4	1	0	0	0	0	0	0	1
MIMAT0000692	hsa-miR-30e-5p	ENSG00000158109	TPRG1L	protein_coding	chr1	3545613	3545619	3545597	3545620	+	7	0	AGO1-4,AGO2	1	0	0	0	1	0	1	3
MIMAT0000692	hsa-miR-30e-5p	ENSG00000187017	ESPN	protein_coding	chr1	6520738	6520744	6520717	6520745	+	4	0	AGO1-4	1	0	1	1	1	0	1	5
MIMAT0000692	hsa-miR-30e-5p	ENSG00000116273	PHF13	protein_coding	chr1	6683951	6683956	6683951	6683957	+	18	0	AGO1,AGO1-4,AGO2,AGO3,AGO4	1	0	0	0	0	0	1	2
MIMAT0000692	hsa-miR-30e-5p	ENSG00000171735	CAMTA1	protein_coding	chr1	6885218	6885239	6885218	6885239	+	11	0	AGO1-4,AGO2	0	0	0	0	1	0	0	1
MIMAT0000692	hsa-miR-30e-5p	ENSG00000049245	VAMP3	protein_coding	chr1	7840266	7840273	7840246	7840274	+	17	0	AGO1-4,AGO2	1	0	0	1	1	0	0	3
MIMAT0000692	hsa-miR-30e-5p	ENSG00000049246	PER3	protein_coding	chr1	7903918	7903924	7903901	7903925	+	6	0	AGO1-4,AGO2	1	0	0	0	1	0	0	2
MIMAT0000692	hsa-miR-30e-5p	ENSG00000049239	H6PD	protein_coding	chr1	9326745	9326751	9326745	9326752	+	1	0	AGO1-4	1	0	0	0	0	0	1	2
MIMAT0000692	hsa-miR-30e-5p	ENSG00000049239	H6PD	protein_coding	chr1	9327905	9327911	9327892	9327912	+	10	0	AGO1-4,AGO2	1	0	0	0	1	0	0	2
MIMAT0000692	hsa-miR-30e-5p	ENSG00000171608	PIK3CD	protein_coding	chr1	9787231	9787237	9787210	9787238	+	5	0	AGO1-4,AGO2	1	0	0	1	1	0	1	4
MIMAT0000692	hsa-miR-30e-5p	ENSG00000054523	KIF1B	protein_coding	chr1	10328246	10328267	10328246	10328267	+	1	0	AGO1-4	0	0	0	0	1	0	0	1
MIMAT0000692	hsa-miR-30e-5p	ENSG00000054523	KIF1B	protein_coding	chr1	10440817	10440823	10440804	10440824	+	14	0	AGO1-4,AGO2	1	0	0	0	1	0	0	2
MIMAT0000692	hsa-miR-30e-5p	ENSG00000120948	TARDBP	protein_coding	chr1	11084942	11084947	11084942	11084947	+	1	0	AGO2	1	0	0	0	0	0	0	1
MIMAT0000692	hsa-miR-30e-5p	ENSG00000116138	DNAJC16	protein_coding	chr1	15895194	15895199	15895194	15895199	+	4	0	AGO1-4,AGO2	1	0	0	0	0	0	0	1
MIMAT0000692	hsa-miR-30e-5p	ENSG00000116138	DNAJC16	protein_coding	chr1	15897270	15897276	15897258	15897277	+	1	0	AGO2	1	0	0	0	1	0	0	2
MIMAT0000692	hsa-miR-30e-5p	ENSG00000197312	DDI2	protein_coding	chr1	15989409	15989415	15989388	15989416	+	1	0	AGO2	0	0	1	1	0	0	1	3
MIMAT0000692	hsa-miR-30e-5p	ENSG00000197312	DDI2	protein_coding	chr1	15989990	15989995	15989968	15989996	+	2	0	AGO1-4,AGO2	0	0	1	1	0	0	0	2
MIMAT0000692	hsa-miR-30e-5p	ENSG00000197312	DDI2	protein_coding	chr1	15994251	15994279	15994251	15994279	+	2	0	AGO1-4,AGO2	0	0	0	1	0	0	0	1
MIMAT0000692	hsa-miR-30e-5p	ENSG00000197312	DDI2	protein_coding	chr1	15994650	15994656	15994629	15994672	+	7	0	AGO1-4,AGO2	0	0	1	2	0	0	1	4
MIMAT0000692	hsa-miR-30e-5p	ENSG00000197312	DDI2	protein_coding	chr1	15995048	15995054	15995027	15995055	+	8	0	AGO1-4,AGO2	0	0	1	1	0	0	1	3
MIMAT0000692	hsa-miR-30e-5p	ENSG00000065526	SPEN	protein_coding	chr1	16202894	16202922	16202894	16202922	+	3	0	AGO1-4	0	0	0	1	0	0	0	1
MIMAT0000692	hsa-miR-30e-5p	ENSG00000065526	SPEN	protein_coding	chr1	16266113	16266119	16266092	16266120	+	18	0	AGO1,AGO1-4,AGO2,AGO3	1	0	0	1	1	0	1	4
MIMAT0000692	hsa-miR-30e-5p	ENSG00000065526	SPEN	protein_coding	chr1	16266519	16266524	16266497	16266525	+	14	0	AGO1,AGO1-4,AGO2	1	0	0	1	0	0	1	3
MIMAT0000692	hsa-miR-30e-5p	ENSG00000169914	OTUD3	protein_coding	chr1	20237505	20237510	20237505	20237510	+	3	0	AGO1-4,AGO2	1	0	0	0	0	0	0	1
MIMAT0000692	hsa-miR-30e-5p	ENSG00000184677	ZBTB40	protein_coding	chr1	22854099	22854105	22854099	22854106	+	1	0	AGO2	1	0	0	0	0	0	1	2
MIMAT0000692	hsa-miR-30e-5p	ENSG00000133216	EPHB2	protein_coding	chr1	23240951	23240957	23240930	23240958	+	1	0	AGO1-4	1	0	0	1	1	0	1	4
MIMAT0000692	hsa-miR-30e-5p	ENSG00000162430	SELENON	protein_coding	chr1	26142865	26142870	26142865	26142870	+	3	0	AGO1,AGO1-4	1	0	0	0	0	0	0	1
MIMAT0000692	hsa-miR-30e-5p	ENSG00000131914	LIN28A	protein_coding	chr1	26754631	26754659	26754631	26754659	+	1	0	AGO2	0	0	0	1	0	0	0	1
MIMAT0000692	hsa-miR-30e-5p	ENSG00000117713	ARID1A	protein_coding	chr1	27107117	27107145	27107117	27107145	+	4	0	AGO1-4,AGO2	0	0	0	1	0	0	0	1
MIMAT0000692	hsa-miR-30e-5p	ENSG00000117713	ARID1A	protein_coding	chr1	27107348	27107353	27107326	27107354	+	25	1	AGO1,AGO1-4,AGO2,AGO3	1	0	0	1	0	0	0	2
MIMAT0000692	hsa-miR-30e-5p	ENSG00000117713	ARID1A	protein_coding	chr1	27107554	27107560	27107533	27107561	+	9	0	AGO1,AGO1-4,AGO2	1	0	0	1	1	0	1	4
MIMAT0000692	hsa-miR-30e-5p	ENSG00000117758	STX12	protein_coding	chr1	28149107	28149113	28149094	28149114	+	7	0	AGO1-4,AGO2	1	0	0	0	1	0	0	2
MIMAT0000692	hsa-miR-30e-5p	ENSG00000117758	STX12	protein_coding	chr1	28149463	28149468	28149463	28149468	+	3	0	AGO1,AGO1-4,AGO2	1	0	0	0	0	0	0	1
MIMAT0000692	hsa-miR-30e-5p	ENSG00000204138	PHACTR4	protein_coding	chr1	28826296	28826301	28826296	28826301	+	1	0	AGO1-4	1	0	0	0	0	0	0	1
MIMAT0000692	hsa-miR-30e-5p	ENSG00000198492	YTHDF2	protein_coding	chr1	29096137	29096142	29096115	29096143	+	14	1	AGO1,AGO1-4,AGO2	1	0	0	1	1	0	0	3
MIMAT0000692	hsa-miR-30e-5p	ENSG00000159023	EPB41	protein_coding	chr1	29359634	29359662	29359634	29359662	+	2	0	AGO1-4,AGO2	0	0	0	1	0	0	0	1
MIMAT0000692	hsa-miR-30e-5p	ENSG00000159023	EPB41	protein_coding	chr1	29446366	29446372	29446345	29446373	+	7	0	AGO1-4,AGO2	1	0	1	1	1	0	1	5
MIMAT0000692	hsa-miR-30e-5p	ENSG00000025800	KPNA6	protein_coding	chr1	32637378	32637384	32637364	32637385	+	27	0	AGO1,AGO1-4,AGO2	1	0	0	0	1	0	1	3
MIMAT0000692	hsa-miR-30e-5p	ENSG00000162522	KIAA1522	protein_coding	chr1	33238946	33238951	33238924	33238952	+	8	0	AGO1-4	1	0	0	1	1	1	1	5
MIMAT0000692	hsa-miR-30e-5p	ENSG00000162522	KIAA1522	protein_coding	chr1	33239023	33239028	33239001	33239029	+	1	0	AGO1-4	1	0	0	1	0	0	0	2
MIMAT0000692	hsa-miR-30e-5p	ENSG00000116497	S100PBP	protein_coding	chr1	33322332	33322338	33322311	33322339	+	23	0	AGO1,AGO1-4,AGO2	1	0	1	1	1	0	1	5
MIMAT0000692	hsa-miR-30e-5p	ENSG00000116497	S100PBP	protein_coding	chr1	33323450	33323469	33323441	33323469	+	2	0	AGO1,AGO2	0	0	0	1	1	0	0	2
MIMAT0000692	hsa-miR-30e-5p	ENSG00000116497	S100PBP	protein_coding	chr1	33324287	33324293	33324266	33324303	+	13	0	AGO1-4,AGO2	1	0	1	2	1	0	1	6
MIMAT0000692	hsa-miR-30e-5p	ENSG00000116497	S100PBP	protein_coding	chr1	33324296	33324302	33324296	33324302	+	13	0	AGO1-4,AGO2	1	0	1	0	0	0	0	2
MIMAT0000692	hsa-miR-30e-5p	ENSG00000197056	ZMYM1	protein_coding	chr1	35581295	35581300	35581295	35581300	+	2	0	AGO2	1	0	0	0	0	0	0	1
MIMAT0000692	hsa-miR-30e-5p	ENSG00000197056	ZMYM1	protein_coding	chr1	35581400	35581405	35581400	35581405	+	1	0	AGO1-4	1	0	0	0	0	0	0	1
MIMAT0000692	hsa-miR-30e-5p	ENSG00000134698	AGO4	protein_coding	chr1	36320735	36320740	36320735	36320740	+	1	0	AGO2	1	0	0	0	0	0	0	1
MIMAT0000692	hsa-miR-30e-5p	ENSG00000134698	AGO4	protein_coding	chr1	36321036	36321041	36321036	36321042	+	3	0	AGO1-4,AGO2	1	0	0	0	0	0	1	2
MIMAT0000692	hsa-miR-30e-5p	ENSG00000092847	AGO1	protein_coding	chr1	36386824	36386830	36386803	36386831	+	15	0	AGO1,AGO2	1	0	0	1	1	0	1	4
MIMAT0000692	hsa-miR-30e-5p	ENSG00000126070	AGO3	protein_coding	chr1	36521506	36521512	36521492	36521513	+	2	0	AGO2	1	0	0	0	1	0	1	3
MIMAT0000692	hsa-miR-30e-5p	ENSG00000134690	CDCA8	protein_coding	chr1	38174758	38174764	38174744	38174765	+	8	0	AGO1-4,AGO2	1	0	0	0	1	0	0	2
MIMAT0000692	hsa-miR-30e-5p	ENSG00000174574	AKIRIN1	protein_coding	chr1	39471558	39471564	39471537	39471565	+	9	0	AGO2	0	0	0	1	1	0	1	3
MIMAT0000692	hsa-miR-30e-5p	ENSG00000168653	NDUFS5	protein_coding	chr1	39500231	39500237	39500215	39500238	+	16	0	AGO1,AGO1-4,AGO2	1	0	0	0	1	0	0	2
MIMAT0000692	hsa-miR-30e-5p	ENSG00000084073	ZMPSTE24	protein_coding	chr1	40759411	40759418	40759401	40759419	+	3	0	AGO1-4,AGO2	1	0	0	0	1	0	0	2
MIMAT0000692	hsa-miR-30e-5p	ENSG00000171793	CTPS1	protein_coding	chr1	41449032	41449060	41449032	41449060	+	8	0	AGO1,AGO2,AGO3	0	0	0	1	0	0	0	1
MIMAT0000692	hsa-miR-30e-5p	ENSG00000171793	CTPS1	protein_coding	chr1	41477367	41477372	41477345	41477387	+	7	0	AGO1,AGO2	1	0	0	2	0	0	1	4
MIMAT0000692	hsa-miR-30e-5p	ENSG00000065978	YBX1	protein_coding	chr1	43167952	43167957	43167930	43167958	+	3	0	AGO1-4	1	0	0	1	1	1	1	5
MIMAT0000692	hsa-miR-30e-5p	ENSG00000187147	RNF220	protein_coding	chr1	45116831	45116837	45116810	45116838	+	16	2	AGO1-4,AGO2	1	0	0	1	1	0	1	4
MIMAT0000692	hsa-miR-30e-5p	ENSG00000159596	TMEM69	protein_coding	chr1	46159786	46159791	46159771	46159792	+	2	0	AGO1-4	1	0	0	0	1	0	0	2
MIMAT0000692	hsa-miR-30e-5p	ENSG00000086015	MAST2	protein_coding	chr1	46474005	46474026	46474005	46474026	+	9	0	AGO1-4,AGO2	0	0	0	0	1	0	0	1
MIMAT0000692	hsa-miR-30e-5p	ENSG00000117481	NSUN4	protein_coding	chr1	46830622	46830629	46830622	46830629	+	1	0	AGO2	1	0	0	0	0	0	0	1
MIMAT0000692	hsa-miR-30e-5p	ENSG00000162378	ZYG11B	protein_coding	chr1	53237220	53237248	53237220	53237248	+	1	0	AGO2	0	0	0	1	0	0	0	1
MIMAT0000692	hsa-miR-30e-5p	ENSG00000162378	ZYG11B	protein_coding	chr1	53290971	53290976	53290949	53290977	+	2	0	AGO1-4,AGO2	1	0	0	1	0	0	0	2
MIMAT0000692	hsa-miR-30e-5p	ENSG00000162378	ZYG11B	protein_coding	chr1	53291727	53291749	53291721	53291749	+	7	1	AGO2	0	0	0	1	1	0	0	2
MIMAT0000692	hsa-miR-30e-5p	ENSG00000162409	PRKAA2	protein_coding	chr1	57173761	57173766	57173739	57173767	+	1	0	AGO2	1	0	1	1	0	0	0	3
MIMAT0000692	hsa-miR-30e-5p	ENSG00000162409	PRKAA2	protein_coding	chr1	57176736	57176742	57176715	57176743	+	3	0	AGO2	1	0	1	1	0	0	0	3
MIMAT0000692	hsa-miR-30e-5p	ENSG00000162409	PRKAA2	protein_coding	chr1	57177772	57177778	57177751	57177779	+	2	0	AGO2	1	0	1	1	0	0	0	3
MIMAT0000692	hsa-miR-30e-5p	ENSG00000162409	PRKAA2	protein_coding	chr1	57178987	57179015	57178987	57179015	+	3	0	AGO2	0	0	0	1	0	0	0	1
MIMAT0000692	hsa-miR-30e-5p	ENSG00000134709	HOOK1	protein_coding	chr1	60339594	60339616	60339594	60339616	+	1	0	AGO2	0	0	0	0	1	0	0	1
MIMAT0000692	hsa-miR-30e-5p	ENSG00000162599	NFIA	protein_coding	chr1	61923648	61923654	61923630	61923655	+	8	0	AGO1-4,AGO2	0	0	0	0	1	0	1	2
MIMAT0000692	hsa-miR-30e-5p	ENSG00000088035	ALG6	protein_coding	chr1	63902962	63902983	63902962	63902983	+	7	0	AGO2	0	0	0	0	1	0	0	1
MIMAT0000692	hsa-miR-30e-5p	ENSG00000079739	PGM1	protein_coding	chr1	64117430	64117458	64117430	64117458	+	5	0	AGO1-4,AGO2	0	0	0	1	0	0	0	1
MIMAT0000692	hsa-miR-30e-5p	ENSG00000079739	PGM1	protein_coding	chr1	64125628	64125633	64125606	64125634	+	1	0	AGO2	1	0	1	1	0	0	0	3
MIMAT0000692	hsa-miR-30e-5p	ENSG00000079739	PGM1	protein_coding	chr1	64125757	64125763	64125736	64125764	+	4	0	AGO1-4,AGO2	1	0	1	1	1	0	1	5
MIMAT0000692	hsa-miR-30e-5p	ENSG00000185483	ROR1	protein_coding	chr1	64646152	64646158	64646131	64646159	+	2	0	AGO1-4	0	0	1	1	0	0	0	2
MIMAT0000692	hsa-miR-30e-5p	ENSG00000158966	CACHD1	protein_coding	chr1	65157989	65157995	65157968	65157996	+	3	0	AGO2	1	0	0	1	1	0	1	4
MIMAT0000692	hsa-miR-30e-5p	ENSG00000162437	RAVER2	protein_coding	chr1	65297277	65297283	65297256	65297284	+	3	0	AGO1-4,AGO2	1	0	1	1	1	0	0	4
MIMAT0000692	hsa-miR-30e-5p	ENSG00000162437	RAVER2	protein_coding	chr1	65297424	65297430	65297403	65297431	+	5	0	AGO1-4,AGO2	1	0	1	1	1	0	1	5
MIMAT0000692	hsa-miR-30e-5p	ENSG00000162433	AK4	protein_coding	chr1	65697567	65697572	65697567	65697572	+	1	0	AGO1-4	0	0	1	0	0	0	0	1
MIMAT0000692	hsa-miR-30e-5p	ENSG00000116678	LEPR	protein_coding	chr1	66101003	66101009	66100990	66101010	+	2	0	AGO1-4,AGO2	1	0	0	0	1	0	1	3
MIMAT0000692	hsa-miR-30e-5p	ENSG00000116761	CTH	protein_coding	chr1	70905243	70905248	70905221	70905249	+	5	0	AGO1-4,AGO2	1	0	1	1	1	0	1	5
MIMAT0000692	hsa-miR-30e-5p	ENSG00000116761	CTH	protein_coding	chr1	70905287	70905292	70905265	70905293	+	2	0	AGO1-4,AGO2	0	0	1	1	0	0	0	2
MIMAT0000692	hsa-miR-30e-5p	ENSG00000162624	LHX8	protein_coding	chr1	75626778	75626783	75626756	75626784	+	4	0	AGO2	1	0	1	1	1	1	1	6
MIMAT0000692	hsa-miR-30e-5p	ENSG00000180488	MIGA1	protein_coding	chr1	78343174	78343180	78343160	78343181	+	8	0	AGO1-4,AGO2	1	0	0	0	1	0	0	2
MIMAT0000692	hsa-miR-30e-5p	ENSG00000162614	NEXN	protein_coding	chr1	78408891	78408896	78408891	78408896	+	1	0	AGO1-4	1	0	0	0	0	0	0	1
MIMAT0000692	hsa-miR-30e-5p	ENSG00000162616	DNAJB4	protein_coding	chr1	78481991	78481996	78481991	78481996	+	4	0	AGO1-4,AGO2	1	0	1	0	0	0	0	2
MIMAT0000692	hsa-miR-30e-5p	ENSG00000162616	DNAJB4	protein_coding	chr1	78483213	78483218	78483213	78483218	+	1	0	AGO2	0	0	1	0	0	0	0	1
MIMAT0000692	hsa-miR-30e-5p	ENSG00000142875	PRKACB	protein_coding	chr1	84630459	84630481	84630459	84630481	+	1	0	AGO2	0	0	0	0	1	0	0	1
MIMAT0000692	hsa-miR-30e-5p	ENSG00000142875	PRKACB	protein_coding	chr1	84630575	84630595	84630575	84630595	+	1	0	AGO2	0	0	0	0	1	0	0	1
MIMAT0000692	hsa-miR-30e-5p	ENSG00000142875	PRKACB	protein_coding	chr1	84702036	84702041	84702036	84702041	+	1	0	AGO2	1	0	0	0	0	0	0	1
MIMAT0000692	hsa-miR-30e-5p	ENSG00000097033	SH3GLB1	protein_coding	chr1	87209429	87209435	87209414	87209436	+	2	0	AGO2	1	0	0	0	1	0	1	3
MIMAT0000692	hsa-miR-30e-5p	ENSG00000197147	LRRC8B	protein_coding	chr1	90058354	90058382	90058354	90058382	+	2	0	AGO2	0	0	0	1	0	0	0	1
MIMAT0000692	hsa-miR-30e-5p	ENSG00000197147	LRRC8B	protein_coding	chr1	90058552	90058580	90058552	90058580	+	8	0	AGO1,AGO1-4,AGO2	0	0	0	1	0	0	0	1
MIMAT0000692	hsa-miR-30e-5p	ENSG00000197147	LRRC8B	protein_coding	chr1	90059207	90059213	90059186	90059214	+	11	0	AGO1,AGO1-4,AGO2	1	0	1	1	0	0	0	3
MIMAT0000692	hsa-miR-30e-5p	ENSG00000197147	LRRC8B	protein_coding	chr1	90063057	90063063	90063036	90063064	+	13	0	AGO2	0	0	1	1	1	0	0	3
MIMAT0000692	hsa-miR-30e-5p	ENSG00000171488	LRRC8C	protein_coding	chr1	90152088	90152116	90152088	90152116	+	5	0	AGO1,AGO2	0	0	0	1	0	0	0	1
MIMAT0000692	hsa-miR-30e-5p	ENSG00000271949	AC093423.3	protein_coding	chr1	90152088	90152116	90152088	90152116	+	5	0	AGO1,AGO2	0	0	0	1	0	0	0	1
MIMAT0000692	hsa-miR-30e-5p	ENSG00000171488	LRRC8C	protein_coding	chr1	90180227	90180255	90180227	90180255	+	1	0	AGO1	0	0	0	1	0	0	0	1
MIMAT0000692	hsa-miR-30e-5p	ENSG00000171488	LRRC8C	protein_coding	chr1	90180903	90180909	90180882	90180910	+	11	0	AGO1,AGO2,AGO3	0	0	1	1	1	0	1	4
MIMAT0000692	hsa-miR-30e-5p	ENSG00000171488	LRRC8C	protein_coding	chr1	90184923	90184929	90184902	90184930	+	4	0	AGO1,AGO2	0	0	1	1	1	0	0	3
MIMAT0000692	hsa-miR-30e-5p	ENSG00000171492	LRRC8D	protein_coding	chr1	90400785	90400813	90400785	90400813	+	8	0	AGO1,AGO1-4,AGO2	0	0	0	1	0	0	0	1
MIMAT0000692	hsa-miR-30e-5p	ENSG00000171492	LRRC8D	protein_coding	chr1	90401503	90401509	90401482	90401510	+	27	0	AGO1-4,AGO2	1	0	0	1	1	0	1	4
MIMAT0000692	hsa-miR-30e-5p	ENSG00000097046	CDC7	protein_coding	chr1	91990011	91990017	91990000	91990018	+	13	0	AGO1,AGO1-4,AGO2,AGO3	1	0	1	0	1	0	0	3
MIMAT0000692	hsa-miR-30e-5p	ENSG00000097046	CDC7	protein_coding	chr1	91990719	91990725	91990705	91990726	+	4	0	AGO1-4,AGO2	1	0	1	0	1	0	1	4
MIMAT0000692	hsa-miR-30e-5p	ENSG00000122484	RPAP2	protein_coding	chr1	92846315	92846335	92846315	92846335	+	1	0	AGO1-4	0	0	0	0	1	0	0	1
MIMAT0000692	hsa-miR-30e-5p	ENSG00000122484	RPAP2	protein_coding	chr1	92846403	92846424	92846403	92846424	+	1	0	AGO2	0	0	0	0	1	0	0	1
MIMAT0000692	hsa-miR-30e-5p	ENSG00000143033	MTF2	protein_coding	chr1	93604210	93604216	93604196	93604217	+	8	0	AGO1,AGO1-4,AGO2	0	0	0	0	1	0	1	2
MIMAT0000692	hsa-miR-30e-5p	ENSG00000122483	CCDC18	protein_coding	chr1	93744085	93744091	93744064	93744092	+	2	0	AGO2	1	0	0	1	1	0	0	3
MIMAT0000692	hsa-miR-30e-5p	ENSG00000117505	DR1	protein_coding	chr1	93827158	93827163	93827143	93827164	+	3	0	AGO2	1	0	0	0	1	0	0	2
MIMAT0000692	hsa-miR-30e-5p	ENSG00000152078	TMEM56	protein_coding	chr1	95660792	95660797	95660770	95660798	+	2	0	AGO1-4,AGO2	0	0	1	1	0	0	0	2
MIMAT0000692	hsa-miR-30e-5p	ENSG00000152078	TMEM56	protein_coding	chr1	95661528	95661556	95661528	95661556	+	1	0	AGO2	0	0	0	1	0	0	0	1
MIMAT0000692	hsa-miR-30e-5p	ENSG00000152078	TMEM56	protein_coding	chr1	95662148	95662154	95662127	95662155	+	1	0	AGO1-4	0	0	1	1	1	0	1	4
MIMAT0000692	hsa-miR-30e-5p	ENSG00000162688	AGL	protein_coding	chr1	100388457	100388462	100388457	100388462	+	1	0	AGO2	1	0	0	0	0	0	0	1
MIMAT0000692	hsa-miR-30e-5p	ENSG00000117620	SLC35A3	protein_coding	chr1	100489039	100489045	100489018	100489046	+	1	0	AGO2	0	0	1	1	0	0	0	2
MIMAT0000692	hsa-miR-30e-5p	ENSG00000117620	SLC35A3	protein_coding	chr1	100491582	100491588	100491561	100491589	+	1	0	AGO2	0	0	1	1	0	0	1	3
MIMAT0000692	hsa-miR-30e-5p	ENSG00000156875	MFSD14A	protein_coding	chr1	100548789	100548794	100548767	100548795	+	11	0	AGO1-4,AGO2	1	0	0	1	1	0	1	4
MIMAT0000692	hsa-miR-30e-5p	ENSG00000283761	AC118553.2	protein_coding	chr1	100548789	100548794	100548767	100548795	+	11	0	AGO1-4,AGO2	1	0	0	1	1	0	1	4
MIMAT0000692	hsa-miR-30e-5p	ENSG00000122435	TRMT13	protein_coding	chr1	100606159	100606165	100606159	100606165	+	1	0	AGO1-4	0	0	1	0	0	0	0	1
MIMAT0000692	hsa-miR-30e-5p	ENSG00000198890	PRMT6	protein_coding	chr1	107600647	107600654	107600627	107600655	+	7	0	AGO1,AGO1-4,AGO2	1	0	0	1	1	0	0	3
MIMAT0000692	hsa-miR-30e-5p	ENSG00000162631	NTNG1	protein_coding	chr1	108024354	108024375	108024354	108024375	+	1	0	AGO1-4	0	0	0	0	1	0	0	1
MIMAT0000692	hsa-miR-30e-5p	ENSG00000162636	FAM102B	protein_coding	chr1	109180507	109180512	109180507	109180512	+	3	0	AGO1-4,AGO2	1	0	0	0	0	0	0	1
MIMAT0000692	hsa-miR-30e-5p	ENSG00000168765	GSTM4	protein_coding	chr1	110204251	110204256	110204251	110204256	+	2	0	AGO2	1	0	0	0	0	0	0	1
MIMAT0000692	hsa-miR-30e-5p	ENSG00000134184	GSTM1	protein_coding	chr1	110236296	110236301	110236296	110236301	+	1	0	AGO2	1	0	0	0	0	0	0	1
MIMAT0000692	hsa-miR-30e-5p	ENSG00000143093	STRIP1	protein_coding	chr1	110597236	110597242	110597215	110597243	+	12	0	AGO1-4,AGO2	1	0	1	1	1	0	1	5
MIMAT0000692	hsa-miR-30e-5p	ENSG00000162775	RBM15	protein_coding	chr1	110889013	110889018	110889013	110889018	+	2	0	AGO1-4	1	0	0	0	0	0	0	1
MIMAT0000692	hsa-miR-30e-5p	ENSG00000116459	ATP5PB	protein_coding	chr1	112003719	112003724	112003702	112003725	+	8	0	AGO1-4,AGO2	1	0	0	0	1	0	0	2
MIMAT0000692	hsa-miR-30e-5p	ENSG00000143079	CTTNBP2NL	protein_coding	chr1	113003399	113003406	113003378	113003406	+	5	0	AGO1,AGO1-4,AGO2	0	0	0	1	1	0	1	3
MIMAT0000692	hsa-miR-30e-5p	ENSG00000116489	CAPZA1	protein_coding	chr1	113213939	113213945	113213918	113213946	+	30	0	AGO1,AGO1-4,AGO2,AGO3	1	0	0	1	1	0	1	4
MIMAT0000692	hsa-miR-30e-5p	ENSG00000155363	MOV10	protein_coding	chr1	113243241	113243246	113243241	113243247	+	7	0	AGO1-4,AGO2	1	0	0	0	0	0	1	2
MIMAT0000692	hsa-miR-30e-5p	ENSG00000081026	MAGI3	protein_coding	chr1	114227084	114227090	114227063	114227091	+	1	0	AGO1-4	1	0	0	1	1	0	1	4
MIMAT0000692	hsa-miR-30e-5p	ENSG00000163349	HIPK1	protein_coding	chr1	114517791	114517796	114517769	114517797	+	15	0	AGO1-4,AGO2	1	0	0	1	0	0	1	3
MIMAT0000692	hsa-miR-30e-5p	ENSG00000173218	VANGL1	protein_coding	chr1	116234568	116234573	116234568	116234573	+	5	0	AGO1-4,AGO2	1	0	1	0	0	0	0	2
MIMAT0000692	hsa-miR-30e-5p	ENSG00000134247	PTGFRN	protein_coding	chr1	117529758	117529764	117529737	117529765	+	8	0	AGO1-4,AGO2	1	0	1	1	1	0	1	5
MIMAT0000692	hsa-miR-30e-5p	ENSG00000134247	PTGFRN	protein_coding	chr1	117532295	117532301	117532274	117532316	+	25	0	AGO1,AGO1-4,AGO2,AGO3	1	0	1	2	2	0	1	7
MIMAT0000692	hsa-miR-30e-5p	ENSG00000134247	PTGFRN	protein_coding	chr1	117532309	117532315	117532308	117532316	+	25	0	AGO1,AGO1-4,AGO2,AGO3	1	0	1	0	0	0	1	3
MIMAT0000692	hsa-miR-30e-5p	ENSG00000198162	MAN1A2	protein_coding	chr1	118065615	118065621	118065594	118065622	+	13	0	AGO1-4,AGO2	1	0	0	1	1	0	1	4
MIMAT0000692	hsa-miR-30e-5p	ENSG00000183508	FAM46C	protein_coding	chr1	118167301	118167306	118167279	118167307	+	3	0	AGO1-4	1	0	1	1	0	0	0	3
MIMAT0000692	hsa-miR-30e-5p	ENSG00000183508	FAM46C	protein_coding	chr1	118170060	118170065	118170038	118170066	+	1	0	AGO1-4	1	0	1	1	0	0	0	3
MIMAT0000692	hsa-miR-30e-5p	ENSG00000183508	FAM46C	protein_coding	chr1	118170514	118170520	118170493	118170521	+	7	0	AGO1-4,AGO2	1	0	1	1	1	1	1	6
MIMAT0000692	hsa-miR-30e-5p	ENSG00000162825	NBPF8	protein_coding	chr1	144201815	144201835	144201815	144201835	+	11	0	AGO1-4	0	0	0	0	1	0	0	1
MIMAT0000692	hsa-miR-30e-5p	ENSG00000162825	NBPF8	protein_coding	chr1	144209770	144209790	144209770	144209790	+	9	0	AGO1-4	0	0	0	0	1	0	0	1
MIMAT0000692	hsa-miR-30e-5p	ENSG00000162825	NBPF8	protein_coding	chr1	144212955	144212975	144212955	144212975	+	9	0	AGO1-4	0	0	0	0	1	0	0	1
MIMAT0000692	hsa-miR-30e-5p	ENSG00000271425	NBPF10	protein_coding	chr1	145351213	145351233	145351213	145351233	+	12	0	AGO1-4	0	0	0	0	1	0	0	1
MIMAT0000692	hsa-miR-30e-5p	ENSG00000265491	RNF115	protein_coding	chr1	145689899	145689905	145689899	145689905	+	3	0	AGO1-4	0	0	0	0	0	0	1	1
MIMAT0000692	hsa-miR-30e-5p	ENSG00000174827	PDZK1	protein_coding	chr1	145763712	145763718	145763697	145763719	+	1	0	AGO1-4	1	0	0	0	1	0	0	2
MIMAT0000692	hsa-miR-30e-5p	ENSG00000116128	BCL9	protein_coding	chr1	147096099	147096127	147096099	147096127	+	2	0	AGO1-4,AGO2	0	0	0	1	0	0	0	1
MIMAT0000692	hsa-miR-30e-5p	ENSG00000116128	BCL9	protein_coding	chr1	147097089	147097095	147097068	147097096	+	10	0	AGO1-4,AGO2	1	0	0	1	1	0	1	4
MIMAT0000692	hsa-miR-30e-5p	ENSG00000116128	BCL9	protein_coding	chr1	147097246	147097252	147097225	147097253	+	2	0	AGO1-4,AGO2	1	0	0	1	1	0	1	4
MIMAT0000692	hsa-miR-30e-5p	ENSG00000163125	RPRD2	protein_coding	chr1	150447865	150447871	150447850	150447872	+	7	0	AGO1-4,AGO2	0	0	0	0	1	0	1	2
MIMAT0000692	hsa-miR-30e-5p	ENSG00000143376	SNX27	protein_coding	chr1	151667496	151667501	151667474	151667502	+	5	0	AGO1-4,AGO2	1	0	0	1	0	0	1	3
MIMAT0000692	hsa-miR-30e-5p	ENSG00000143553	SNAPIN	protein_coding	chr1	153634171	153634177	153634150	153634178	+	15	0	AGO1,AGO1-4,AGO2,AGO3	1	0	0	1	1	0	1	4
MIMAT0000692	hsa-miR-30e-5p	ENSG00000143515	ATP8B2	protein_coding	chr1	154319137	154319165	154319137	154319165	+	1	0	AGO1-4	0	0	0	1	0	0	0	1
MIMAT0000692	hsa-miR-30e-5p	ENSG00000143515	ATP8B2	protein_coding	chr1	154323450	154323478	154323450	154323478	+	2	0	AGO2	0	0	0	1	0	0	0	1
MIMAT0000692	hsa-miR-30e-5p	ENSG00000143590	EFNA3	protein_coding	chr1	155059486	155059492	155059465	155059493	+	1	0	AGO2	1	0	0	1	1	0	1	4
MIMAT0000692	hsa-miR-30e-5p	ENSG00000143590	EFNA3	protein_coding	chr1	155059556	155059561	155059534	155059562	+	6	0	AGO1-4,AGO2	1	0	0	1	0	0	1	3
MIMAT0000692	hsa-miR-30e-5p	ENSG00000143630	HCN3	protein_coding	chr1	155259141	155259147	155259127	155259148	+	2	0	AGO1-4	1	0	0	0	1	0	0	2
MIMAT0000692	hsa-miR-30e-5p	ENSG00000143630	HCN3	protein_coding	chr1	155259324	155259329	155259324	155259329	+	2	0	AGO1-4	1	0	0	0	0	0	0	1
MIMAT0000692	hsa-miR-30e-5p	ENSG00000163472	TMEM79	protein_coding	chr1	156261956	156261962	156261942	156261963	+	1	0	AGO2	1	0	0	0	1	0	0	2
MIMAT0000692	hsa-miR-30e-5p	ENSG00000143258	USP21	protein_coding	chr1	161135297	161135302	161135297	161135302	+	3	0	AGO1-4,AGO2	1	0	0	0	0	0	0	1
MIMAT0000692	hsa-miR-30e-5p	ENSG00000162746	FCRLB	protein_coding	chr1	161697884	161697905	161697884	161697905	+	1	0	AGO1-4	0	0	0	0	1	0	0	1
MIMAT0000692	hsa-miR-30e-5p	ENSG00000152332	UHMK1	protein_coding	chr1	162493291	162493296	162493269	162493297	+	14	0	AGO1-4,AGO2	1	0	1	1	0	0	0	3
MIMAT0000692	hsa-miR-30e-5p	ENSG00000152332	UHMK1	protein_coding	chr1	162494820	162494825	162494798	162494826	+	4	0	AGO1-4	0	0	1	1	0	0	0	2
MIMAT0000692	hsa-miR-30e-5p	ENSG00000152332	UHMK1	protein_coding	chr1	162496440	162496445	162496418	162496446	+	4	1	AGO1-4	0	0	1	1	0	0	0	2
MIMAT0000692	hsa-miR-30e-5p	ENSG00000152332	UHMK1	protein_coding	chr1	162496498	162496503	162496498	162496503	+	2	0	AGO2	0	0	1	0	0	0	0	1
MIMAT0000692	hsa-miR-30e-5p	ENSG00000152332	UHMK1	protein_coding	chr1	162497258	162497263	162497236	162497264	+	16	0	AGO1,AGO1-4,AGO2,AGO3	0	0	1	1	0	0	0	2
MIMAT0000692	hsa-miR-30e-5p	ENSG00000152332	UHMK1	protein_coding	chr1	162498888	162498893	162498888	162498893	+	3	0	AGO1-4	0	0	1	0	0	0	0	1
MIMAT0000692	hsa-miR-30e-5p	ENSG00000117143	UAP1	protein_coding	chr1	162569456	162569461	162569456	162569461	+	6	0	AGO1-4,AGO2	1	0	0	0	0	0	0	1
MIMAT0000692	hsa-miR-30e-5p	ENSG00000198771	RCSD1	protein_coding	chr1	167674377	167674383	167674363	167674384	+	1	0	AGO1-4	1	0	0	0	1	0	0	2
MIMAT0000692	hsa-miR-30e-5p	ENSG00000000460	C1orf112	protein_coding	chr1	169777015	169777036	169777015	169777036	+	4	0	AGO1-4,AGO2	0	0	0	0	1	0	0	1
MIMAT0000692	hsa-miR-30e-5p	ENSG00000120370	GORAB	protein_coding	chr1	170521832	170521837	170521832	170521837	+	2	0	AGO2	1	0	1	0	0	0	0	2
MIMAT0000692	hsa-miR-30e-5p	ENSG00000120370	GORAB	protein_coding	chr1	170522211	170522216	170522211	170522216	+	1	0	AGO2	1	0	1	0	0	0	0	2
MIMAT0000692	hsa-miR-30e-5p	ENSG00000116132	PRRX1	protein_coding	chr1	170705293	170705298	170705293	170705299	+	2	0	AGO1-4	1	0	0	0	0	0	1	2
MIMAT0000692	hsa-miR-30e-5p	ENSG00000116132	PRRX1	protein_coding	chr1	170706913	170706918	170706913	170706918	+	4	0	AGO1-4	1	0	0	0	0	0	0	1
MIMAT0000692	hsa-miR-30e-5p	ENSG00000117523	PRRC2C	protein_coding	chr1	171562480	171562485	171562480	171562485	+	10	1	AGO1-4,AGO2,AGO3	1	0	0	0	0	0	0	1
MIMAT0000692	hsa-miR-30e-5p	ENSG00000010165	METTL13	protein_coding	chr1	171766722	171766727	171766722	171766727	+	2	0	AGO1-4,AGO2	1	0	0	0	0	0	0	1
MIMAT0000692	hsa-miR-30e-5p	ENSG00000076321	KLHL20	protein_coding	chr1	173703094	173703122	173703094	173703122	+	8	0	AGO1,AGO1-4,AGO2	0	0	0	1	0	0	0	1
MIMAT0000692	hsa-miR-30e-5p	ENSG00000076321	KLHL20	protein_coding	chr1	173755693	173755699	173755672	173755700	+	15	0	AGO1-4,AGO2	1	0	1	1	1	0	1	5
MIMAT0000692	hsa-miR-30e-5p	ENSG00000076321	KLHL20	protein_coding	chr1	173755753	173755759	173755732	173755760	+	19	0	AGO1,AGO1-4,AGO2	1	0	1	1	1	0	1	5
MIMAT0000692	hsa-miR-30e-5p	ENSG00000152061	RABGAP1L	protein_coding	chr1	174963096	174963102	174963075	174963103	+	1	0	AGO1-4	0	0	1	1	0	0	0	2
MIMAT0000692	hsa-miR-30e-5p	ENSG00000152061	RABGAP1L	protein_coding	chr1	174964249	174964255	174964228	174964256	+	5	0	AGO1-4,AGO2	0	0	1	1	0	0	1	3
MIMAT0000692	hsa-miR-30e-5p	ENSG00000075391	RASAL2	protein_coding	chr1	178442452	178442457	178442430	178442458	+	4	0	AGO1-4,AGO2	1	0	1	1	0	0	1	4
MIMAT0000692	hsa-miR-30e-5p	ENSG00000075391	RASAL2	protein_coding	chr1	178443161	178443189	178443161	178443189	+	1	1	AGO2	0	0	0	1	0	0	0	1
MIMAT0000692	hsa-miR-30e-5p	ENSG00000116191	RALGPS2	protein_coding	chr1	178888654	178888661	178888633	178888661	+	4	0	AGO1-4,AGO2	0	0	0	1	1	0	1	3
MIMAT0000692	hsa-miR-30e-5p	ENSG00000057252	SOAT1	protein_coding	chr1	179323439	179323444	179323439	179323444	+	4	0	AGO1-4,AGO2	1	0	0	0	0	0	0	1
MIMAT0000692	hsa-miR-30e-5p	ENSG00000135837	CEP350	protein_coding	chr1	180063315	180063343	180063315	180063343	+	3	0	AGO1-4,AGO2	0	0	0	1	0	0	0	1
MIMAT0000692	hsa-miR-30e-5p	ENSG00000135837	CEP350	protein_coding	chr1	180081038	180081043	180081038	180081043	+	3	0	AGO1-4,AGO2	1	0	0	0	0	0	0	1
MIMAT0000692	hsa-miR-30e-5p	ENSG00000135837	CEP350	protein_coding	chr1	180083549	180083555	180083528	180083556	+	18	0	AGO1,AGO1-4,AGO2	1	0	0	1	1	0	1	4
MIMAT0000692	hsa-miR-30e-5p	ENSG00000135837	CEP350	protein_coding	chr1	180083792	180083797	180083770	180083798	+	9	0	AGO1-4,AGO2	1	0	0	1	0	0	0	2
MIMAT0000692	hsa-miR-30e-5p	ENSG00000143324	XPR1	protein_coding	chr1	180853481	180853487	180853460	180853488	+	2	0	AGO2	1	0	0	1	1	0	1	4
MIMAT0000692	hsa-miR-30e-5p	ENSG00000135862	LAMC1	protein_coding	chr1	183114032	183114037	183114032	183114037	+	2	0	AGO1-4,AGO2	1	0	0	0	0	0	0	1
MIMAT0000692	hsa-miR-30e-5p	ENSG00000116698	SMG7	protein_coding	chr1	183523031	183523036	183523031	183523036	+	7	0	AGO1,AGO1-4,AGO2	1	0	0	0	0	0	0	1
MIMAT0000692	hsa-miR-30e-5p	ENSG00000143344	RGL1	protein_coding	chr1	183775529	183775557	183775529	183775557	+	2	0	AGO1-4,AGO2	0	0	0	1	0	0	0	1
MIMAT0000692	hsa-miR-30e-5p	ENSG00000143344	RGL1	protein_coding	chr1	183885730	183885758	183885730	183885758	+	5	0	AGO1,AGO1-4,AGO2	0	0	0	1	0	0	0	1
MIMAT0000692	hsa-miR-30e-5p	ENSG00000143344	RGL1	protein_coding	chr1	183897596	183897602	183897575	183897603	+	3	0	AGO2	1	0	0	1	1	0	1	4
MIMAT0000692	hsa-miR-30e-5p	ENSG00000198860	TSEN15	protein_coding	chr1	184043009	184043015	184042988	184043016	+	10	0	AGO1-4,AGO2	1	0	1	1	1	0	0	4
MIMAT0000692	hsa-miR-30e-5p	ENSG00000121481	RNF2	protein_coding	chr1	185069562	185069567	185069562	185069567	+	5	0	AGO1-4,AGO2	1	0	0	0	0	0	0	1
MIMAT0000692	hsa-miR-30e-5p	ENSG00000143341	HMCN1	protein_coding	chr1	186159297	186159302	186159281	186159303	+	1	0	AGO1-4	1	0	0	0	1	0	0	2
MIMAT0000692	hsa-miR-30e-5p	ENSG00000116690	PRG4	protein_coding	chr1	186283089	186283095	186283068	186283096	+	1	0	AGO1-4	1	0	1	1	1	0	0	4
MIMAT0000692	hsa-miR-30e-5p	ENSG00000090104	RGS1	protein_coding	chr1	192549078	192549084	192549057	192549085	+	5	0	AGO1-4,AGO2	1	0	0	1	1	0	0	3
MIMAT0000692	hsa-miR-30e-5p	ENSG00000116741	RGS2	protein_coding	chr1	192781156	192781162	192781144	192781163	+	3	0	AGO1-4,AGO2	1	0	0	0	1	0	0	2
MIMAT0000692	hsa-miR-30e-5p	ENSG00000134371	CDC73	protein_coding	chr1	193221402	193221423	193221402	193221423	+	6	0	AGO2	0	0	0	0	1	0	0	1
MIMAT0000692	hsa-miR-30e-5p	ENSG00000116833	NR5A2	protein_coding	chr1	200144755	200144761	200144734	200144762	+	1	0	AGO2	1	0	0	1	1	0	1	4
MIMAT0000692	hsa-miR-30e-5p	ENSG00000134369	NAV1	protein_coding	chr1	201790697	201790702	201790697	201790702	+	1	0	AGO2	1	0	0	0	0	0	0	1
MIMAT0000692	hsa-miR-30e-5p	ENSG00000134369	NAV1	protein_coding	chr1	201791901	201791907	201791901	201791908	+	5	0	AGO1-4,AGO2	1	0	0	0	0	0	1	2
MIMAT0000692	hsa-miR-30e-5p	ENSG00000077157	PPP1R12B	protein_coding	chr1	202553342	202553348	202553342	202553348	+	1	0	AGO2	1	0	0	0	0	0	0	1
MIMAT0000692	hsa-miR-30e-5p	ENSG00000077157	PPP1R12B	protein_coding	chr1	202555304	202555310	202555304	202555310	+	1	0	AGO2	1	0	0	0	0	0	0	1
MIMAT0000692	hsa-miR-30e-5p	ENSG00000143842	SOX13	protein_coding	chr1	204096810	204096816	204096789	204096817	+	1	0	AGO2	1	0	0	1	1	0	1	4
MIMAT0000692	hsa-miR-30e-5p	ENSG00000198625	MDM4	protein_coding	chr1	204523660	204523667	204523660	204523667	+	12	0	AGO1,AGO1-4,AGO2	0	0	0	0	0	0	1	1
MIMAT0000692	hsa-miR-30e-5p	ENSG00000163531	NFASC	protein_coding	chr1	204986399	204986405	204986399	204986405	+	1	0	AGO1-4	1	0	0	0	0	0	0	1
MIMAT0000692	hsa-miR-30e-5p	ENSG00000123836	PFKFB2	protein_coding	chr1	207250741	207250748	207250741	207250748	+	1	0	AGO2	1	0	0	0	0	0	0	1
MIMAT0000692	hsa-miR-30e-5p	ENSG00000117625	RCOR3	protein_coding	chr1	211486530	211486552	211486530	211486552	+	2	0	AGO1-4,AGO2	0	0	0	0	1	0	0	1
MIMAT0000692	hsa-miR-30e-5p	ENSG00000162769	FLVCR1	protein_coding	chr1	213068831	213068837	213068810	213068838	+	17	0	AGO1,AGO1-4,AGO2	0	0	1	1	1	0	0	3
MIMAT0000692	hsa-miR-30e-5p	ENSG00000162769	FLVCR1	protein_coding	chr1	213068916	213068921	213068894	213068922	+	1	0	AGO1-4	0	0	1	1	0	0	0	2
MIMAT0000692	hsa-miR-30e-5p	ENSG00000162769	FLVCR1	protein_coding	chr1	213069861	213069867	213069840	213069868	+	5	0	AGO1,AGO1-4,AGO2	0	0	1	1	1	0	1	4
MIMAT0000692	hsa-miR-30e-5p	ENSG00000136643	RPS6KC1	protein_coding	chr1	213414933	213414961	213414933	213414961	+	6	0	AGO1,AGO2,AGO3	0	0	0	1	0	0	0	1
MIMAT0000692	hsa-miR-30e-5p	ENSG00000136643	RPS6KC1	protein_coding	chr1	213415332	213415360	213415332	213415360	+	22	0	AGO1-4,AGO2	0	0	0	1	0	0	0	1
MIMAT0000692	hsa-miR-30e-5p	ENSG00000136643	RPS6KC1	protein_coding	chr1	213446137	213446142	213446115	213446143	+	6	0	AGO1-4,AGO2	1	0	0	1	1	0	0	3
MIMAT0000692	hsa-miR-30e-5p	ENSG00000117707	PROX1	protein_coding	chr1	214211826	214211854	214211826	214211854	+	1	0	AGO2	0	0	0	1	0	0	0	1
MIMAT0000692	hsa-miR-30e-5p	ENSG00000117707	PROX1	protein_coding	chr1	214213245	214213273	214213245	214213273	+	1	0	AGO2	0	0	0	1	0	0	0	1
MIMAT0000692	hsa-miR-30e-5p	ENSG00000136636	KCTD3	protein_coding	chr1	215759846	215759874	215759846	215759874	+	6	0	AGO1-4,AGO2	0	0	0	1	0	0	0	1
MIMAT0000692	hsa-miR-30e-5p	ENSG00000136636	KCTD3	protein_coding	chr1	215775500	215775528	215775500	215775528	+	20	0	AGO1,AGO1-4,AGO2	0	0	0	1	0	0	0	1
MIMAT0000692	hsa-miR-30e-5p	ENSG00000136636	KCTD3	protein_coding	chr1	215794417	215794423	215794396	215794424	+	8	0	AGO1-4,AGO2	1	0	0	1	1	0	1	4
MIMAT0000692	hsa-miR-30e-5p	ENSG00000143353	LYPLAL1	protein_coding	chr1	219384959	219384987	219384959	219384987	+	3	0	AGO1-4,AGO2	0	0	0	1	0	0	0	1
MIMAT0000692	hsa-miR-30e-5p	ENSG00000143353	LYPLAL1	protein_coding	chr1	219386110	219386131	219386103	219386131	+	6	0	AGO1-4,AGO2	0	0	0	1	1	0	0	2
MIMAT0000692	hsa-miR-30e-5p	ENSG00000116141	MARK1	protein_coding	chr1	220752804	220752832	220752804	220752832	+	1	0	AGO2	0	0	0	1	0	0	0	1
MIMAT0000692	hsa-miR-30e-5p	ENSG00000136630	HLX	protein_coding	chr1	221058382	221058388	221058361	221058389	+	1	0	AGO2	1	0	1	1	1	0	1	5
MIMAT0000692	hsa-miR-30e-5p	ENSG00000154305	MIA3	protein_coding	chr1	222794565	222794593	222794565	222794593	+	3	0	AGO1-4,AGO2	0	0	0	1	0	0	0	1
MIMAT0000692	hsa-miR-30e-5p	ENSG00000154305	MIA3	protein_coding	chr1	222801149	222801177	222801149	222801177	+	2	0	AGO1-4,AGO2	0	0	0	1	0	0	0	1
MIMAT0000692	hsa-miR-30e-5p	ENSG00000154305	MIA3	protein_coding	chr1	222839404	222839410	222839383	222839411	+	9	0	AGO1-4,AGO2	1	0	1	1	1	0	1	5
MIMAT0000692	hsa-miR-30e-5p	ENSG00000154305	MIA3	protein_coding	chr1	222839733	222839738	222839711	222839739	+	4	0	AGO2	1	0	1	1	0	0	0	3
MIMAT0000692	hsa-miR-30e-5p	ENSG00000143756	FBXO28	protein_coding	chr1	224347437	224347444	224347416	224347452	+	1	0	AGO1-4	0	0	0	2	1	0	1	4
MIMAT0000692	hsa-miR-30e-5p	ENSG00000143756	FBXO28	protein_coding	chr1	224349620	224349648	224349620	224349648	+	1	0	AGO2	0	0	0	1	0	0	0	1
MIMAT0000692	hsa-miR-30e-5p	ENSG00000143801	PSEN2	protein_coding	chr1	227083401	227083407	227083385	227083408	+	1	0	AGO1-4	1	0	0	0	1	0	1	3
MIMAT0000692	hsa-miR-30e-5p	ENSG00000168118	RAB4A	protein_coding	chr1	229440053	229440054	229440049	229440076	+	10	0	AGO1,AGO2	1	0	0	0	1	0	0	2
MIMAT0000692	hsa-miR-30e-5p	ENSG00000168118	RAB4A	protein_coding	chr1	229440069	229440075	229440069	229440075	+	5	0	AGO2	1	0	0	0	0	0	1	2
MIMAT0000692	hsa-miR-30e-5p	ENSG00000143641	GALNT2	protein_coding	chr1	230415683	230415688	230415661	230415689	+	2	0	AGO2	1	0	0	1	0	0	0	2
MIMAT0000692	hsa-miR-30e-5p	ENSG00000143641	GALNT2	protein_coding	chr1	230417506	230417512	230417485	230417513	+	8	0	AGO1-4,AGO2	1	0	0	1	1	0	1	4
MIMAT0000692	hsa-miR-30e-5p	ENSG00000135775	COG2	protein_coding	chr1	230829389	230829394	230829367	230829395	+	6	0	AGO2	1	0	0	1	1	0	0	3
MIMAT0000692	hsa-miR-30e-5p	ENSG00000116906	GNPAT	protein_coding	chr1	231413451	231413456	231413451	231413456	+	3	0	AGO1-4,AGO2	1	0	0	0	0	0	0	1
MIMAT0000692	hsa-miR-30e-5p	ENSG00000143674	MAP3K21	protein_coding	chr1	233519886	233519914	233519886	233519914	+	1	0	AGO2	0	0	0	1	0	0	0	1
MIMAT0000692	hsa-miR-30e-5p	ENSG00000143674	MAP3K21	protein_coding	chr1	233520835	233520841	233520814	233520842	+	16	1	AGO1,AGO1-4,AGO2	1	0	1	1	1	0	1	5
MIMAT0000692	hsa-miR-30e-5p	ENSG00000183780	SLC35F3	protein_coding	chr1	234460025	234460053	234460025	234460053	+	1	0	AGO2	0	0	0	1	0	0	0	1
MIMAT0000692	hsa-miR-30e-5p	ENSG00000284770	TBCE	protein_coding	chr1	235612179	235612184	235612179	235612184	+	2	0	AGO1-4,AGO2	1	0	0	0	0	0	0	1
MIMAT0000692	hsa-miR-30e-5p	ENSG00000285053	TBCE	protein_coding	chr1	235612179	235612184	235612179	235612184	+	2	0	AGO1-4,AGO2	1	0	0	0	0	0	0	1
MIMAT0000692	hsa-miR-30e-5p	ENSG00000186197	EDARADD	protein_coding	chr1	236647026	236647031	236647026	236647031	+	5	0	AGO1-4	1	0	0	0	0	0	0	1
MIMAT0000692	hsa-miR-30e-5p	ENSG00000116984	MTR	protein_coding	chr1	237063847	237063853	237063847	237063853	+	12	0	AGO1-4,AGO2	1	0	0	0	0	0	0	1
MIMAT0000692	hsa-miR-30e-5p	ENSG00000133019	CHRM3	protein_coding	chr1	240072644	240072665	240072637	240072665	+	1	0	AGO2	0	0	0	1	1	0	0	2
MIMAT0000692	hsa-miR-30e-5p	ENSG00000133019	CHRM3	protein_coding	chr1	240074153	240074160	240074132	240074160	+	2	0	AGO1-4	0	0	0	1	0	0	1	2
MIMAT0000692	hsa-miR-30e-5p	ENSG00000179456	ZBTB18	protein_coding	chr1	244219736	244219742	244219715	244219743	+	28	0	AGO1,AGO1-4,AGO2	1	0	0	1	1	0	1	4
MIMAT0000692	hsa-miR-30e-5p	ENSG00000121644	DESI2	protein_coding	chr1	244869363	244869368	244869341	244869391	+	4	0	AGO1-4,AGO2	1	0	1	2	1	0	1	6
MIMAT0000692	hsa-miR-30e-5p	ENSG00000121644	DESI2	protein_coding	chr1	244869384	244869390	244869371	244869391	+	4	0	AGO1-4,AGO2	1	0	1	0	1	0	1	4
MIMAT0000692	hsa-miR-30e-5p	ENSG00000203667	COX20	protein_coding	chr1	245007606	245007611	245007606	245007611	+	1	0	AGO1-4	1	0	0	0	0	0	0	1
MIMAT0000692	hsa-miR-30e-5p	ENSG00000185220	PGBD2	protein_coding	chr1	249211709	249211737	249211709	249211737	+	3	0	AGO1-4	0	0	0	1	0	0	0	1
MIMAT0000692	hsa-miR-30e-5p	ENSG00000185220	PGBD2	protein_coding	chr1	249212597	249212604	249212577	249212605	+	3	0	AGO1-4,AGO2	1	0	0	1	1	0	0	3
MIMAT0000692	hsa-miR-30e-5p	ENSG00000151240	DIP2C	protein_coding	chr10	320298	320305	320298	320326	-	1	0	AGO1-4	0	0	0	1	1	0	1	3
MIMAT0000692	hsa-miR-30e-5p	ENSG00000148429	USP6NL	protein_coding	chr10	11503695	11503700	11503695	11503700	-	3	0	AGO2	1	0	0	0	0	0	0	1
MIMAT0000692	hsa-miR-30e-5p	ENSG00000165609	NUDT5	protein_coding	chr10	12207327	12207355	12207327	12207355	-	1	0	AGO2	0	0	0	1	0	0	0	1
MIMAT0000692	hsa-miR-30e-5p	ENSG00000165609	NUDT5	protein_coding	chr10	12209466	12209472	12209465	12209493	-	1	0	AGO1-4	0	0	1	1	0	0	0	2
MIMAT0000692	hsa-miR-30e-5p	ENSG00000086475	SEPHS1	protein_coding	chr10	13361336	13361342	13361335	13361356	-	2	0	AGO1-4	0	0	0	0	1	0	1	2
MIMAT0000692	hsa-miR-30e-5p	ENSG00000165626	BEND7	protein_coding	chr10	13483364	13483370	13483363	13483391	-	4	0	AGO1,AGO2	1	0	1	1	1	0	1	5
MIMAT0000692	hsa-miR-30e-5p	ENSG00000151474	FRMD4A	protein_coding	chr10	13688463	13688468	13688462	13688490	-	1	0	AGO1-4	1	0	0	1	0	0	0	2
MIMAT0000692	hsa-miR-30e-5p	ENSG00000077943	ITGA8	protein_coding	chr10	15557627	15557634	15557627	15557655	-	5	0	AGO1-4,AGO2	0	0	0	1	0	0	1	2
MIMAT0000692	hsa-miR-30e-5p	ENSG00000078114	NEBL	protein_coding	chr10	21073178	21073183	21073177	21073205	-	1	0	AGO1-4	1	0	1	1	0	0	0	3
MIMAT0000692	hsa-miR-30e-5p	ENSG00000180592	SKIDA1	protein_coding	chr10	21803807	21803812	21803806	21803834	-	4	0	AGO1-4	1	0	0	1	0	0	0	2
MIMAT0000692	hsa-miR-30e-5p	ENSG00000150867	PIP4K2A	protein_coding	chr10	22824061	22824066	22824060	22824088	-	4	0	AGO1-4	1	0	1	1	0	0	0	3
MIMAT0000692	hsa-miR-30e-5p	ENSG00000150867	PIP4K2A	protein_coding	chr10	22824957	22824962	22824956	22824984	-	4	0	AGO1-4,AGO2	1	0	1	1	1	0	1	5
MIMAT0000692	hsa-miR-30e-5p	ENSG00000150867	PIP4K2A	protein_coding	chr10	22825028	22825033	22825027	22825055	-	10	0	AGO1,AGO2,AGO3	1	0	1	1	1	1	1	6
MIMAT0000692	hsa-miR-30e-5p	ENSG00000150867	PIP4K2A	protein_coding	chr10	22826008	22826013	22826007	22826035	-	15	0	AGO1,AGO1-4,AGO2,AGO3	1	0	1	1	1	1	1	6
MIMAT0000692	hsa-miR-30e-5p	ENSG00000136758	YME1L1	protein_coding	chr10	27399544	27399550	27399543	27399565	-	8	0	AGO1-4,AGO2	1	0	0	0	1	0	0	2
MIMAT0000692	hsa-miR-30e-5p	ENSG00000107897	ACBD5	protein_coding	chr10	27486051	27486058	27486050	27486078	-	10	0	AGO1-4,AGO2	1	0	0	1	1	0	0	3
MIMAT0000692	hsa-miR-30e-5p	ENSG00000150054	MPP7	protein_coding	chr10	28340669	28340675	28340668	28340689	-	1	0	AGO2	1	0	0	0	1	0	0	2
MIMAT0000692	hsa-miR-30e-5p	ENSG00000170759	KIF5B	protein_coding	chr10	32300217	32300222	32300217	32300222	-	21	0	AGO1,AGO1-4,AGO2,AGO3	1	0	0	0	0	0	0	1
MIMAT0000692	hsa-miR-30e-5p	ENSG00000120616	EPC1	protein_coding	chr10	32557561	32557568	32557561	32557589	-	6	1	AGO1-4,AGO2	0	0	0	1	0	0	1	2
MIMAT0000692	hsa-miR-30e-5p	ENSG00000150093	ITGB1	protein_coding	chr10	33189459	33189466	33189458	33189486	-	14	1	AGO1-4	1	0	0	1	1	0	0	3
MIMAT0000692	hsa-miR-30e-5p	ENSG00000150093	ITGB1	protein_coding	chr10	33211570	33211598	33211570	33211598	-	3	0	AGO1-4,AGO2	0	0	0	1	0	0	0	1
MIMAT0000692	hsa-miR-30e-5p	ENSG00000099250	NRP1	protein_coding	chr10	33468435	33468441	33468434	33468455	-	17	0	AGO1-4,AGO2	1	0	0	0	1	0	1	3
MIMAT0000692	hsa-miR-30e-5p	ENSG00000108094	CUL2	protein_coding	chr10	35299112	35299117	35299111	35299139	-	6	0	AGO1,AGO1-4,AGO2	1	0	0	1	1	1	1	5
MIMAT0000692	hsa-miR-30e-5p	ENSG00000198105	ZNF248	protein_coding	chr10	38119620	38119626	38119619	38119639	-	2	1	AGO1-4	1	0	0	0	1	0	0	2
MIMAT0000692	hsa-miR-30e-5p	ENSG00000107562	CXCL12	protein_coding	chr10	44866486	44866492	44866486	44866492	-	3	0	AGO1-4	1	0	0	0	0	0	0	1
MIMAT0000692	hsa-miR-30e-5p	ENSG00000165406	2020-03-08	protein_coding	chr10	45953629	45953635	45953628	45953656	-	6	0	AGO1-4,AGO2	1	0	1	1	1	0	1	5
MIMAT0000692	hsa-miR-30e-5p	ENSG00000148584	A1CF	protein_coding	chr10	52566204	52566211	52566204	52566224	-	1	0	AGO1-4	0	1	0	0	0	0	1	2
MIMAT0000692	hsa-miR-30e-5p	ENSG00000177613	CSTF2T	protein_coding	chr10	53455423	53455428	53455423	53455428	-	2	0	AGO1-4	1	0	1	0	0	0	0	2
MIMAT0000692	hsa-miR-30e-5p	ENSG00000177613	CSTF2T	protein_coding	chr10	53457025	53457030	53457025	53457030	-	1	0	AGO2	1	0	1	0	0	0	0	2
MIMAT0000692	hsa-miR-30e-5p	ENSG00000122952	ZWINT	protein_coding	chr10	58118071	58118076	58118071	58118076	-	1	0	AGO2	1	0	0	0	0	0	0	1
MIMAT0000692	hsa-miR-30e-5p	ENSG00000151151	IPMK	protein_coding	chr10	59953702	59953709	59953702	59953730	-	2	0	AGO1-4,AGO2	0	0	0	1	0	0	1	2
MIMAT0000692	hsa-miR-30e-5p	ENSG00000148541	FAM13C	protein_coding	chr10	61006563	61006568	61006562	61006583	-	3	0	AGO2	1	0	1	0	1	0	0	3
MIMAT0000692	hsa-miR-30e-5p	ENSG00000108091	CCDC6	protein_coding	chr10	61552240	61552246	61552239	61552261	-	18	0	AGO1,AGO1-4,AGO2	1	0	0	0	1	0	1	3
MIMAT0000692	hsa-miR-30e-5p	ENSG00000072422	RHOBTB1	protein_coding	chr10	62630396	62630401	62630396	62630401	-	1	0	AGO1-4	1	0	0	0	0	0	0	1
MIMAT0000692	hsa-miR-30e-5p	ENSG00000182010	RTKN2	protein_coding	chr10	63953585	63953591	63953584	63953612	-	2	0	AGO2	1	0	1	1	1	0	0	4
MIMAT0000692	hsa-miR-30e-5p	ENSG00000182010	RTKN2	protein_coding	chr10	63954093	63954099	63954092	63954120	-	2	0	AGO2	1	0	1	1	1	0	0	4
MIMAT0000692	hsa-miR-30e-5p	ENSG00000182010	RTKN2	protein_coding	chr10	63954103	63954109	63954102	63954130	-	2	0	AGO2	1	0	1	1	1	0	1	5
MIMAT0000692	hsa-miR-30e-5p	ENSG00000171988	JMJD1C	protein_coding	chr10	64927449	64927454	64927448	64927476	-	10	0	AGO1-4,AGO2	1	0	0	1	1	0	0	3
MIMAT0000692	hsa-miR-30e-5p	ENSG00000171988	JMJD1C	protein_coding	chr10	64968163	64968191	64968163	64968191	-	5	0	AGO1-4,AGO2	0	0	0	1	0	0	0	1
MIMAT0000692	hsa-miR-30e-5p	ENSG00000171988	JMJD1C	protein_coding	chr10	64973784	64973812	64973784	64973812	-	2	0	AGO1-4	0	0	0	1	0	0	0	1
MIMAT0000692	hsa-miR-30e-5p	ENSG00000148634	HERC4	protein_coding	chr10	69785417	69785423	69785417	69785423	-	1	0	AGO1-4	0	0	0	0	0	0	1	1
MIMAT0000692	hsa-miR-30e-5p	ENSG00000122884	P4HA1	protein_coding	chr10	74767568	74767574	74767567	74767595	-	2	0	AGO1-4	1	0	0	1	0	0	0	2
MIMAT0000692	hsa-miR-30e-5p	ENSG00000122884	P4HA1	protein_coding	chr10	74767895	74767900	74767894	74767922	-	6	0	AGO1-4	1	0	0	1	1	1	1	5
MIMAT0000692	hsa-miR-30e-5p	ENSG00000213551	DNAJC9	protein_coding	chr10	75002725	75002730	75002725	75002730	-	4	0	AGO1,AGO1-4,AGO2	1	0	0	0	0	0	0	1
MIMAT0000692	hsa-miR-30e-5p	ENSG00000107758	PPP3CB	protein_coding	chr10	75197700	75197705	75197699	75197727	-	11	0	AGO1-4,AGO2	1	0	0	1	1	0	1	4
MIMAT0000692	hsa-miR-30e-5p	ENSG00000185009	AP3M1	protein_coding	chr10	75883102	75883107	75883101	75883129	-	3	0	AGO1-4	1	0	0	1	0	0	1	3
MIMAT0000692	hsa-miR-30e-5p	ENSG00000151208	DLG5	protein_coding	chr10	79551842	79551848	79551841	79551869	-	15	0	AGO1-4,AGO2	1	0	1	1	1	0	1	5
MIMAT0000692	hsa-miR-30e-5p	ENSG00000151208	DLG5	protein_coding	chr10	79551877	79551882	79551876	79551904	-	13	0	AGO1-4,AGO2	1	0	1	1	0	0	1	4
MIMAT0000692	hsa-miR-30e-5p	ENSG00000165424	ZCCHC24	protein_coding	chr10	81143632	81143638	81143631	81143652	-	4	0	AGO1-4,AGO2	1	0	0	0	1	0	1	3
MIMAT0000692	hsa-miR-30e-5p	ENSG00000165424	ZCCHC24	protein_coding	chr10	81144538	81144544	81144538	81144544	-	4	0	AGO1-4,AGO2	1	0	0	0	0	0	1	2
MIMAT0000692	hsa-miR-30e-5p	ENSG00000122359	ANXA11	protein_coding	chr10	81911204	81911232	81911204	81911232	-	3	0	AGO1-4	0	0	0	1	0	0	0	1
MIMAT0000692	hsa-miR-30e-5p	ENSG00000062650	WAPL	protein_coding	chr10	88220169	88220197	88220169	88220197	-	1	0	AGO1-4	0	0	0	1	0	0	0	1
MIMAT0000692	hsa-miR-30e-5p	ENSG00000148672	GLUD1	protein_coding	chr10	88811440	88811445	88811439	88811467	-	10	0	AGO1-4,AGO2	1	0	0	1	1	0	1	4
MIMAT0000692	hsa-miR-30e-5p	ENSG00000138138	ATAD1	protein_coding	chr10	89513659	89513664	89513658	89513679	-	6	0	AGO1-4,AGO2	1	0	0	0	1	0	0	2
MIMAT0000692	hsa-miR-30e-5p	ENSG00000227268	KLLN	protein_coding	chr10	89621385	89621406	89621385	89621406	-	2	0	AGO1-4,AGO2	0	0	0	0	1	0	0	1
MIMAT0000692	hsa-miR-30e-5p	ENSG00000152782	PANK1	protein_coding	chr10	91343814	91343819	91343814	91343819	-	2	0	AGO1-4	1	0	0	0	0	0	0	1
MIMAT0000692	hsa-miR-30e-5p	ENSG00000107864	CPEB3	protein_coding	chr10	93808488	93808493	93808487	93808515	-	4	0	AGO1-4,AGO2	1	0	0	1	0	0	1	3
MIMAT0000692	hsa-miR-30e-5p	ENSG00000107864	CPEB3	protein_coding	chr10	93811098	93811104	93811097	93811125	-	4	0	AGO2	1	0	0	1	1	0	1	4
MIMAT0000692	hsa-miR-30e-5p	ENSG00000119912	IDE	protein_coding	chr10	94212023	94212030	94212023	94212051	-	2	0	AGO1-4	0	0	0	1	0	0	1	2
MIMAT0000692	hsa-miR-30e-5p	ENSG00000095637	SORBS1	protein_coding	chr10	97101401	97101426	97101401	97101429	-	1	0	AGO1-4	0	0	0	1	1	0	0	2
MIMAT0000692	hsa-miR-30e-5p	ENSG00000119977	TCTN3	protein_coding	chr10	97423513	97423520	97423512	97423531	-	2	0	AGO1-4	1	0	0	0	1	0	0	2
MIMAT0000692	hsa-miR-30e-5p	ENSG00000095587	TLL2	protein_coding	chr10	98126523	98126529	98126522	98126550	-	2	0	AGO1-4,AGO2	1	0	1	1	1	0	1	5
MIMAT0000692	hsa-miR-30e-5p	ENSG00000095587	TLL2	protein_coding	chr10	98126674	98126680	98126673	98126701	-	1	0	AGO1-4	1	0	1	1	1	0	1	5
MIMAT0000692	hsa-miR-30e-5p	ENSG00000077147	TM9SF3	protein_coding	chr10	98287204	98287232	98287204	98287232	-	11	0	AGO1,AGO1-4,AGO2	0	0	0	1	0	0	0	1
MIMAT0000692	hsa-miR-30e-5p	ENSG00000171311	EXOSC1	protein_coding	chr10	99196077	99196082	99196077	99196082	-	2	0	AGO1-4,AGO2	1	0	0	0	0	0	0	1
MIMAT0000692	hsa-miR-30e-5p	ENSG00000107566	ERLIN1	protein_coding	chr10	101911539	101911545	101911538	101911566	-	29	0	AGO1,AGO1-4,AGO2	1	0	0	1	1	0	1	4
MIMAT0000692	hsa-miR-30e-5p	ENSG00000107566	ERLIN1	protein_coding	chr10	101935714	101935742	101935714	101935742	-	2	0	AGO1-4,AGO2	0	0	0	1	0	0	0	1
MIMAT0000692	hsa-miR-30e-5p	ENSG00000198408	MGEA5	protein_coding	chr10	103545502	103545508	103545501	103545522	-	17	0	AGO1,AGO1-4,AGO2	1	0	0	0	1	0	0	2
MIMAT0000692	hsa-miR-30e-5p	ENSG00000120029	C10orf76	protein_coding	chr10	103606047	103606053	103606046	103606074	-	2	0	AGO1-4,AGO2	1	0	0	1	1	0	1	4
MIMAT0000692	hsa-miR-30e-5p	ENSG00000138107	ACTR1A	protein_coding	chr10	104239769	104239775	104239768	104239796	-	9	0	AGO1,AGO1-4,AGO2	1	0	0	1	1	0	1	4
MIMAT0000692	hsa-miR-30e-5p	ENSG00000138107	ACTR1A	protein_coding	chr10	104240315	104240320	104240314	104240342	-	4	0	AGO1-4,AGO2	1	0	0	1	0	0	0	2
MIMAT0000692	hsa-miR-30e-5p	ENSG00000156374	PCGF6	protein_coding	chr10	105062868	105062873	105062867	105062887	-	1	0	AGO1-4	1	0	0	0	1	0	0	2
MIMAT0000692	hsa-miR-30e-5p	ENSG00000107957	SH3PXD2A	protein_coding	chr10	105353839	105353845	105353838	105353866	-	9	0	AGO1-4,AGO2	1	0	1	1	1	0	1	5
MIMAT0000692	hsa-miR-30e-5p	ENSG00000107957	SH3PXD2A	protein_coding	chr10	105354470	105354498	105354470	105354498	-	1	0	AGO2	0	0	0	1	0	0	0	1
MIMAT0000692	hsa-miR-30e-5p	ENSG00000107957	SH3PXD2A	protein_coding	chr10	105358799	105358805	105358798	105358826	-	12	0	AGO1-4,AGO2	1	0	1	1	0	0	1	4
MIMAT0000692	hsa-miR-30e-5p	ENSG00000107957	SH3PXD2A	protein_coding	chr10	105360840	105360868	105360840	105360868	-	2	0	AGO2	0	0	0	1	0	0	0	1
MIMAT0000692	hsa-miR-30e-5p	ENSG00000119927	GPAM	protein_coding	chr10	113911979	113911984	113911979	113911984	-	1	0	AGO2	1	0	1	0	0	0	0	2
MIMAT0000692	hsa-miR-30e-5p	ENSG00000165813	CCDC186	protein_coding	chr10	115884172	115884178	115884171	115884192	-	1	0	AGO2	1	0	0	0	1	0	0	2
MIMAT0000692	hsa-miR-30e-5p	ENSG00000151893	CACUL1	protein_coding	chr10	120441660	120441665	120441660	120441665	-	4	0	AGO1-4,AGO2	1	0	0	0	0	0	0	1
MIMAT0000692	hsa-miR-30e-5p	ENSG00000119965	C10orf88	protein_coding	chr10	124691477	124691482	124691477	124691482	-	4	0	AGO2	1	0	0	0	0	0	0	1
MIMAT0000692	hsa-miR-30e-5p	ENSG00000148848	ADAM12	protein_coding	chr10	127702759	127702765	127702758	127702786	-	5	0	AGO1-4,AGO2	0	0	1	1	0	0	1	3
MIMAT0000692	hsa-miR-30e-5p	ENSG00000148848	ADAM12	protein_coding	chr10	127727892	127727920	127727892	127727920	-	1	0	AGO2	0	0	0	1	0	0	0	1
MIMAT0000692	hsa-miR-30e-5p	ENSG00000148773	MKI67	protein_coding	chr10	129896650	129896655	129896650	129896655	-	4	0	AGO1-4,AGO2	1	0	0	0	0	0	0	1
MIMAT0000692	hsa-miR-30e-5p	ENSG00000108001	EBF3	protein_coding	chr10	131634589	131634595	131634588	131634610	-	1	0	AGO2	1	0	0	0	1	0	1	3
MIMAT0000692	hsa-miR-30e-5p	ENSG00000047056	WDR37	protein_coding	chr10	1175746	1175752	1175746	1175752	+	7	0	AGO1-4,AGO2	1	0	0	0	0	0	1	2
MIMAT0000692	hsa-miR-30e-5p	ENSG00000108021	FAM208B	protein_coding	chr10	5805282	5805288	5805268	5805289	+	15	0	AGO1,AGO1-4,AGO2	1	0	0	0	1	0	1	3
MIMAT0000692	hsa-miR-30e-5p	ENSG00000048740	CELF2	protein_coding	chr10	11374828	11374834	11374828	11374834	+	2	0	AGO2	1	0	0	0	0	0	1	2
MIMAT0000692	hsa-miR-30e-5p	ENSG00000181192	DHTKD1	protein_coding	chr10	12163887	12163892	12163887	12163892	+	8	0	AGO1-4,AGO2	1	0	0	0	0	0	0	1
MIMAT0000692	hsa-miR-30e-5p	ENSG00000065665	SEC61A2	protein_coding	chr10	12206645	12206650	12206623	12206651	+	3	0	AGO1-4,AGO2	1	0	0	1	1	0	1	4
MIMAT0000692	hsa-miR-30e-5p	ENSG00000284024	HSPA14	protein_coding	chr10	14886146	14886174	14886146	14886174	+	2	0	AGO1-4	0	0	0	1	0	0	0	1
MIMAT0000692	hsa-miR-30e-5p	ENSG00000284024	HSPA14	protein_coding	chr10	14886341	14886362	14886334	14886362	+	13	0	AGO1-4,AGO2	0	0	0	1	1	0	0	2
MIMAT0000692	hsa-miR-30e-5p	ENSG00000152455	SUV39H2	protein_coding	chr10	14945966	14945972	14945945	14945973	+	9	0	AGO1,AGO1-4,AGO2	1	0	0	1	1	0	1	4
MIMAT0000692	hsa-miR-30e-5p	ENSG00000026025	VIM	protein_coding	chr10	17279450	17279453	17279426	17279471	+	28	0	AGO1,AGO1-4,AGO2	1	0	1	2	2	0	1	7
MIMAT0000692	hsa-miR-30e-5p	ENSG00000026025	VIM	protein_coding	chr10	17279465	17279470	17279465	17279470	+	27	0	AGO1,AGO1-4,AGO2	1	0	1	0	0	0	0	2
MIMAT0000692	hsa-miR-30e-5p	ENSG00000165997	ARL5B	protein_coding	chr10	18965002	18965007	18965002	18965007	+	4	0	AGO1,AGO2	1	0	0	0	0	0	0	1
MIMAT0000692	hsa-miR-30e-5p	ENSG00000165997	ARL5B	protein_coding	chr10	18966039	18966045	18966026	18966046	+	11	0	AGO1-4,AGO2	1	0	0	0	1	0	0	2
MIMAT0000692	hsa-miR-30e-5p	ENSG00000120594	PLXDC2	protein_coding	chr10	20568779	20568784	20568779	20568784	+	2	0	AGO1-4,AGO2	1	0	0	0	0	0	0	1
MIMAT0000692	hsa-miR-30e-5p	ENSG00000078403	MLLT10	protein_coding	chr10	21845952	21845973	21845952	21845973	+	9	0	AGO1-4,AGO2	0	0	0	0	1	0	0	1
MIMAT0000692	hsa-miR-30e-5p	ENSG00000168283	BMI1	protein_coding	chr10	22619425	22619432	22619405	22619433	+	12	0	AGO1,AGO1-4,AGO2	1	0	0	1	1	0	0	3
MIMAT0000692	hsa-miR-30e-5p	ENSG00000148459	PDSS1	protein_coding	chr10	27035661	27035667	27035640	27035668	+	3	0	AGO1-4,AGO2	1	0	0	1	1	0	1	4
MIMAT0000692	hsa-miR-30e-5p	ENSG00000095794	CREM	protein_coding	chr10	35500346	35500352	35500332	35500353	+	3	0	AGO1-4,AGO2	1	0	1	0	1	0	0	3
MIMAT0000692	hsa-miR-30e-5p	ENSG00000108100	CCNY	protein_coding	chr10	35859097	35859103	35859083	35859104	+	9	0	AGO1,AGO1-4,AGO2	1	0	0	0	1	0	1	3
MIMAT0000692	hsa-miR-30e-5p	ENSG00000165731	RET	protein_coding	chr10	43622325	43622330	43622325	43622330	+	2	0	AGO1-4	1	0	0	0	0	0	0	1
MIMAT0000692	hsa-miR-30e-5p	ENSG00000169826	CSGALNACT2	protein_coding	chr10	43680622	43680627	43680622	43680627	+	1	0	AGO1-4	1	0	0	0	0	0	0	1
MIMAT0000692	hsa-miR-30e-5p	ENSG00000107551	RASSF4	protein_coding	chr10	45484729	45484735	45484729	45484735	+	2	0	AGO1-4	0	0	0	0	0	0	1	1
MIMAT0000692	hsa-miR-30e-5p	ENSG00000107643	MAPK8	protein_coding	chr10	49644397	49644404	49644376	49644404	+	4	0	AGO1-4,AGO2	0	0	0	1	0	0	1	2
MIMAT0000692	hsa-miR-30e-5p	ENSG00000107643	MAPK8	protein_coding	chr10	49646021	49646049	49646021	49646049	+	13	0	AGO1,AGO1-4,AGO2,AGO3	0	0	0	1	0	0	0	1
MIMAT0000692	hsa-miR-30e-5p	ENSG00000122873	CISD1	protein_coding	chr10	60049253	60049281	60049253	60049281	+	1	0	AGO1-4	0	0	0	1	0	0	0	1
MIMAT0000692	hsa-miR-30e-5p	ENSG00000072401	UBE2D1	protein_coding	chr10	60128603	60128609	60128582	60128610	+	13	0	AGO1,AGO1-4,AGO2,AGO3	1	0	0	1	1	0	0	3
MIMAT0000692	hsa-miR-30e-5p	ENSG00000150347	ARID5B	protein_coding	chr10	63853573	63853578	63853551	63853579	+	19	0	AGO1-4,AGO2	1	0	0	1	1	1	1	5
MIMAT0000692	hsa-miR-30e-5p	ENSG00000181915	ADO	protein_coding	chr10	64566285	64566290	64566285	64566290	+	2	0	AGO1-4,AGO2	1	0	0	0	0	0	0	1
MIMAT0000692	hsa-miR-30e-5p	ENSG00000181915	ADO	protein_coding	chr10	64566962	64566968	64566947	64566969	+	15	0	AGO1,AGO1-4,AGO2	1	0	0	0	1	0	1	3
MIMAT0000692	hsa-miR-30e-5p	ENSG00000148572	NRBF2	protein_coding	chr10	64914614	64914619	64914592	64914620	+	12	0	AGO1,AGO1-4,AGO2	1	0	0	1	1	0	1	4
MIMAT0000692	hsa-miR-30e-5p	ENSG00000165476	REEP3	protein_coding	chr10	65380749	65380754	65380727	65380755	+	8	0	AGO1-4,AGO2	1	0	1	1	0	0	0	3
MIMAT0000692	hsa-miR-30e-5p	ENSG00000165476	REEP3	protein_coding	chr10	65380994	65381000	65380973	65381001	+	14	0	AGO1-4,AGO2	1	0	1	1	1	0	1	5
MIMAT0000692	hsa-miR-30e-5p	ENSG00000165476	REEP3	protein_coding	chr10	65381230	65381236	65381209	65381237	+	41	0	AGO1,AGO1-4,AGO2	1	0	1	1	1	0	1	5
MIMAT0000692	hsa-miR-30e-5p	ENSG00000165476	REEP3	protein_coding	chr10	65382067	65382073	65382046	65382074	+	8	0	AGO1-4,AGO2	0	0	1	1	0	0	0	2
MIMAT0000692	hsa-miR-30e-5p	ENSG00000165476	REEP3	protein_coding	chr10	65383394	65383399	65383372	65383400	+	3	0	AGO1-4,AGO2	0	0	1	1	0	0	0	2
MIMAT0000692	hsa-miR-30e-5p	ENSG00000096717	SIRT1	protein_coding	chr10	69676417	69676423	69676396	69676424	+	9	0	AGO1-4,AGO2	1	0	0	1	1	0	1	4
MIMAT0000692	hsa-miR-30e-5p	ENSG00000138347	MYPN	protein_coding	chr10	69909845	69909865	69909845	69909865	+	1	0	AGO1-4	0	0	0	0	1	0	0	1
MIMAT0000692	hsa-miR-30e-5p	ENSG00000138336	TET1	protein_coding	chr10	70451651	70451656	70451629	70451657	+	2	0	AGO2	1	0	1	1	0	0	0	3
MIMAT0000692	hsa-miR-30e-5p	ENSG00000138336	TET1	protein_coding	chr10	70451873	70451879	70451852	70451880	+	4	0	AGO2	1	0	1	1	1	0	1	5
MIMAT0000692	hsa-miR-30e-5p	ENSG00000198954	KIF1BP	protein_coding	chr10	70776251	70776258	70776231	70776259	+	19	1	AGO1,AGO1-4,AGO2	1	0	0	1	1	0	0	3
MIMAT0000692	hsa-miR-30e-5p	ENSG00000198246	SLC29A3	protein_coding	chr10	73123085	73123091	73123064	73123092	+	2	0	AGO1-4	1	0	0	1	1	0	1	4
MIMAT0000692	hsa-miR-30e-5p	ENSG00000168209	DDIT4	protein_coding	chr10	74035687	74035693	74035666	74035694	+	38	1	AGO1,AGO1-4,AGO2	1	0	0	1	1	0	1	4
MIMAT0000692	hsa-miR-30e-5p	ENSG00000156026	MCU	protein_coding	chr10	74646440	74646445	74646440	74646445	+	5	0	AGO1-4,AGO2	1	0	0	0	0	0	0	1
MIMAT0000692	hsa-miR-30e-5p	ENSG00000035403	VCL	protein_coding	chr10	75879705	75879710	75879705	75879710	+	25	0	AGO1,AGO1-4,AGO2,AGO3	1	0	0	0	0	0	0	1
MIMAT0000692	hsa-miR-30e-5p	ENSG00000156671	SAMD8	protein_coding	chr10	76939359	76939365	76939338	76939366	+	2	0	AGO2	0	0	1	1	0	0	1	3
MIMAT0000692	hsa-miR-30e-5p	ENSG00000156671	SAMD8	protein_coding	chr10	76939535	76939541	76939514	76939542	+	6	0	AGO1-4,AGO2	0	0	1	1	0	0	1	3
MIMAT0000692	hsa-miR-30e-5p	ENSG00000107771	CCSER2	protein_coding	chr10	86278049	86278054	86278049	86278054	+	1	0	AGO2	1	0	0	0	0	0	0	1
MIMAT0000692	hsa-miR-30e-5p	ENSG00000107789	MINPP1	protein_coding	chr10	89312476	89312482	89312465	89312483	+	9	1	AGO1-4,AGO2	1	0	0	0	1	0	1	3
MIMAT0000692	hsa-miR-30e-5p	ENSG00000171862	PTEN	protein_coding	chr10	89728009	89728014	89727987	89728015	+	9	0	AGO1-4,AGO2	1	0	0	1	0	0	0	2
MIMAT0000692	hsa-miR-30e-5p	ENSG00000171862	PTEN	protein_coding	chr10	89728134	89728139	89728112	89728140	+	13	0	AGO1-4,AGO2	1	0	0	1	0	0	0	2
MIMAT0000692	hsa-miR-30e-5p	ENSG00000171862	PTEN	protein_coding	chr10	89729164	89729192	89729164	89729192	+	1	0	AGO1-4	0	0	0	1	0	0	0	1
MIMAT0000692	hsa-miR-30e-5p	ENSG00000171862	PTEN	protein_coding	chr10	89731088	89731116	89731088	89731116	+	2	0	AGO1-4	0	0	0	1	0	0	0	1
MIMAT0000692	hsa-miR-30e-5p	ENSG00000138182	KIF20B	protein_coding	chr10	91534115	91534120	91534100	91534121	+	2	0	AGO1,AGO2	1	0	0	0	1	0	0	2
MIMAT0000692	hsa-miR-30e-5p	ENSG00000180628	PCGF5	protein_coding	chr10	93011135	93011163	93011135	93011163	+	2	0	AGO1-4	0	0	0	1	0	0	0	1
MIMAT0000692	hsa-miR-30e-5p	ENSG00000180628	PCGF5	protein_coding	chr10	93038116	93038122	93038095	93038123	+	13	0	AGO1,AGO1-4,AGO2,AGO3	1	0	1	1	1	0	1	5
MIMAT0000692	hsa-miR-30e-5p	ENSG00000180628	PCGF5	protein_coding	chr10	93042961	93042967	93042940	93042968	+	1	0	AGO2	1	0	1	1	1	0	0	4
MIMAT0000692	hsa-miR-30e-5p	ENSG00000165338	HECTD2	protein_coding	chr10	93272618	93272623	93272596	93272624	+	6	0	AGO1-4,AGO2	1	0	1	1	0	0	0	3
MIMAT0000692	hsa-miR-30e-5p	ENSG00000165338	HECTD2	protein_coding	chr10	93273656	93273662	93273635	93273663	+	1	0	AGO2	1	0	1	1	1	0	0	4
MIMAT0000692	hsa-miR-30e-5p	ENSG00000165338	HECTD2	protein_coding	chr10	93274184	93274189	93274162	93274190	+	3	0	AGO1-4,AGO2	1	0	1	1	1	0	0	4
MIMAT0000692	hsa-miR-30e-5p	ENSG00000107854	TNKS2	protein_coding	chr10	93623234	93623239	93623212	93623240	+	10	0	AGO1-4,AGO2	1	0	1	1	1	0	0	4
MIMAT0000692	hsa-miR-30e-5p	ENSG00000107854	TNKS2	protein_coding	chr10	93624683	93624688	93624661	93624689	+	10	0	AGO1-4,AGO2	1	0	1	1	0	0	0	3
MIMAT0000692	hsa-miR-30e-5p	ENSG00000198060	2020-03-05	protein_coding	chr10	94113548	94113554	94113534	94113555	+	4	0	AGO2	1	0	0	0	1	0	0	2
MIMAT0000692	hsa-miR-30e-5p	ENSG00000138160	KIF11	protein_coding	chr10	94366384	94366412	94366384	94366412	+	2	0	AGO1-4,AGO2	0	0	0	1	0	0	0	1
MIMAT0000692	hsa-miR-30e-5p	ENSG00000138160	KIF11	protein_coding	chr10	94414716	94414722	94414695	94414723	+	14	0	AGO1,AGO1-4,AGO2	1	0	0	1	1	0	0	3
MIMAT0000692	hsa-miR-30e-5p	ENSG00000138190	EXOC6	protein_coding	chr10	94714438	94714461	94714438	94714461	+	6	0	AGO1-4,AGO2	0	0	0	0	1	0	0	1
MIMAT0000692	hsa-miR-30e-5p	ENSG00000138190	EXOC6	protein_coding	chr10	94733961	94733980	94733961	94733980	+	2	0	AGO1-4,AGO2	0	0	0	0	1	0	0	1
MIMAT0000692	hsa-miR-30e-5p	ENSG00000119969	HELLS	protein_coding	chr10	96361826	96361831	96361811	96361832	+	3	0	AGO1-4,AGO2	1	0	0	0	1	0	0	2
MIMAT0000692	hsa-miR-30e-5p	ENSG00000177853	ZNF518A	protein_coding	chr10	97921464	97921470	97921450	97921471	+	5	0	AGO1-4,AGO2	1	0	0	0	1	0	0	2
MIMAT0000692	hsa-miR-30e-5p	ENSG00000177853	ZNF518A	protein_coding	chr10	97922165	97922170	97922165	97922171	+	7	0	AGO1,AGO1-4,AGO2	1	0	0	0	0	1	0	2
MIMAT0000692	hsa-miR-30e-5p	ENSG00000177853	ZNF518A	protein_coding	chr10	97922486	97922491	97922471	97922492	+	4	0	AGO1,AGO1-4,AGO2	1	0	0	0	1	1	0	3
MIMAT0000692	hsa-miR-30e-5p	ENSG00000196233	LCOR	protein_coding	chr10	98722686	98722692	98722664	98722692	+	14	0	AGO1,AGO1-4,AGO2	0	1	0	1	0	0	1	3
MIMAT0000692	hsa-miR-30e-5p	ENSG00000196233	LCOR	protein_coding	chr10	98723723	98723730	98723702	98723730	+	27	0	AGO1,AGO1-4,AGO2	0	0	0	1	0	0	1	2
MIMAT0000692	hsa-miR-30e-5p	ENSG00000171314	PGAM1	protein_coding	chr10	99192579	99192585	99192565	99192586	+	10	1	AGO1-4,AGO2	1	0	0	0	1	0	0	2
MIMAT0000692	hsa-miR-30e-5p	ENSG00000166024	R3HCC1L	protein_coding	chr10	100004397	100004402	100004397	100004402	+	1	0	AGO2	1	0	0	0	0	0	0	1
MIMAT0000692	hsa-miR-30e-5p	ENSG00000166135	HIF1AN	protein_coding	chr10	102309533	102309538	102309533	102309538	+	4	0	AGO1-4,AGO2	1	0	0	0	0	0	0	1
MIMAT0000692	hsa-miR-30e-5p	ENSG00000119906	SLF2	protein_coding	chr10	102723197	102723203	102723183	102723204	+	8	0	AGO1-4,AGO2	1	0	0	0	1	1	1	4
MIMAT0000692	hsa-miR-30e-5p	ENSG00000166272	WBP1L	protein_coding	chr10	104574915	104574921	104574901	104574922	+	5	0	AGO1-4,AGO2	1	0	0	0	1	0	1	3
MIMAT0000692	hsa-miR-30e-5p	ENSG00000108061	SHOC2	protein_coding	chr10	112772051	112772057	112772030	112772058	+	10	0	AGO1,AGO1-4,AGO2	1	0	0	1	1	0	1	4
MIMAT0000692	hsa-miR-30e-5p	ENSG00000150594	ADRA2A	protein_coding	chr10	112840403	112840409	112840382	112840410	+	2	0	AGO1-4,AGO2	1	0	0	1	1	0	1	4
MIMAT0000692	hsa-miR-30e-5p	ENSG00000150594	ADRA2A	protein_coding	chr10	112840530	112840536	112840508	112840536	+	1	0	AGO2	0	0	0	1	1	0	1	3
MIMAT0000692	hsa-miR-30e-5p	ENSG00000043591	ADRB1	protein_coding	chr10	115805383	115805389	115805369	115805390	+	5	0	AGO1-4,AGO2	1	0	0	0	1	1	1	4
MIMAT0000692	hsa-miR-30e-5p	ENSG00000151553	FAM160B1	protein_coding	chr10	116622255	116622261	116622234	116622262	+	24	0	AGO1,AGO1-4,AGO2	1	0	1	1	1	0	1	5
MIMAT0000692	hsa-miR-30e-5p	ENSG00000151553	FAM160B1	protein_coding	chr10	116624240	116624245	116624218	116624246	+	2	1	AGO1,AGO2	1	0	1	1	1	1	1	6
MIMAT0000692	hsa-miR-30e-5p	ENSG00000165832	TRUB1	protein_coding	chr10	116736846	116736851	116736846	116736851	+	1	0	AGO1-4	1	0	0	0	0	0	0	1
MIMAT0000692	hsa-miR-30e-5p	ENSG00000188613	NANOS1	protein_coding	chr10	120791416	120791421	120791416	120791421	+	1	0	AGO1-4	1	0	0	0	0	0	0	1
MIMAT0000692	hsa-miR-30e-5p	ENSG00000198873	GRK5	protein_coding	chr10	121214936	121214941	121214914	121214942	+	1	0	AGO2	1	0	0	1	1	1	1	5
MIMAT0000692	hsa-miR-30e-5p	ENSG00000107651	SEC23IP	protein_coding	chr10	121663627	121663655	121663627	121663655	+	6	0	AGO1,AGO1-4,AGO2	0	0	0	1	0	0	0	1
MIMAT0000692	hsa-miR-30e-5p	ENSG00000107651	SEC23IP	protein_coding	chr10	121701125	121701131	121701104	121701132	+	3	0	AGO2	1	0	0	1	1	0	1	4
MIMAT0000692	hsa-miR-30e-5p	ENSG00000179988	PSTK	protein_coding	chr10	124742814	124742842	124742814	124742842	+	1	1	AGO1-4	0	0	0	1	0	0	0	1
MIMAT0000692	hsa-miR-30e-5p	ENSG00000154473	BUB3	protein_coding	chr10	124924180	124924185	124924166	124924186	+	3	3	AGO1,AGO2	1	0	0	0	1	0	0	2
MIMAT0000692	hsa-miR-30e-5p	ENSG00000150760	DOCK1	protein_coding	chr10	129249770	129249776	129249770	129249776	+	4	0	AGO1-4,AGO2	1	0	0	0	0	0	0	1
MIMAT0000692	hsa-miR-30e-5p	ENSG00000177225	GATD1	protein_coding	chr11	770263	770268	770263	770268	-	2	0	AGO2	1	0	0	0	0	0	0	1
MIMAT0000692	hsa-miR-30e-5p	ENSG00000167244	IGF2	protein_coding	chr11	2151052	2151057	2151052	2151057	-	4	0	AGO1-4,AGO2	1	0	0	0	0	0	0	1
MIMAT0000692	hsa-miR-30e-5p	ENSG00000284779	IGF2	protein_coding	chr11	2151052	2151057	2151052	2151057	-	4	0	AGO1-4,AGO2	1	0	0	0	0	0	0	1
MIMAT0000692	hsa-miR-30e-5p	ENSG00000110619	CARS	protein_coding	chr11	3022254	3022259	3022253	3022281	-	6	0	AGO1,AGO1-4,AGO2	1	0	0	1	1	1	1	5
MIMAT0000692	hsa-miR-30e-5p	ENSG00000132256	TRIM5	protein_coding	chr11	5685624	5685629	5685624	5685629	-	9	0	AGO1-4,AGO2	1	0	0	0	0	0	0	1
MIMAT0000692	hsa-miR-30e-5p	ENSG00000166340	TPP1	protein_coding	chr11	6634126	6634131	6634126	6634131	-	12	0	AGO1-4,AGO2	1	0	1	0	0	0	0	2
MIMAT0000692	hsa-miR-30e-5p	ENSG00000166340	TPP1	protein_coding	chr11	6635174	6635179	6635174	6635179	-	1	0	AGO1-4	1	0	1	0	0	0	0	2
MIMAT0000692	hsa-miR-30e-5p	ENSG00000166340	TPP1	protein_coding	chr11	6635396	6635401	6635396	6635401	-	2	0	AGO2	1	0	1	0	0	0	0	2
MIMAT0000692	hsa-miR-30e-5p	ENSG00000158042	MRPL17	protein_coding	chr11	6703000	6703005	6703000	6703005	-	9	0	AGO1,AGO1-4,AGO2	1	0	0	0	0	0	0	1
MIMAT0000692	hsa-miR-30e-5p	ENSG00000175348	TMEM9B	protein_coding	chr11	8969164	8969169	8969164	8969169	-	4	0	AGO1-4,AGO2	1	0	0	0	0	0	0	1
MIMAT0000692	hsa-miR-30e-5p	ENSG00000110315	RNF141	protein_coding	chr11	10533616	10533621	10533616	10533621	-	3	0	AGO1-4,AGO2	1	0	0	0	0	0	0	1
MIMAT0000692	hsa-miR-30e-5p	ENSG00000110321	EIF4G2	protein_coding	chr11	10818795	10818800	10818794	10818815	-	40	0	AGO1,AGO1-4,AGO2,AGO3	1	0	0	0	1	0	0	2
MIMAT0000692	hsa-miR-30e-5p	ENSG00000148925	BTBD10	protein_coding	chr11	13410154	13410160	13410153	13410180	-	2	0	AGO2	1	0	0	0	1	0	1	3
MIMAT0000692	hsa-miR-30e-5p	ENSG00000133818	RRAS2	protein_coding	chr11	14300815	14300820	14300814	14300842	-	3	1	AGO1-4,AGO2	1	0	0	1	0	0	0	2
MIMAT0000692	hsa-miR-30e-5p	ENSG00000166689	PLEKHA7	protein_coding	chr11	16809906	16809912	16809905	16809927	-	11	0	AGO1,AGO1-4,AGO2	1	0	0	0	1	0	1	3
MIMAT0000692	hsa-miR-30e-5p	ENSG00000151116	UEVLD	protein_coding	chr11	18553255	18553260	18553254	18553275	-	2	0	AGO1-4,AGO2	1	0	1	0	1	0	0	3
MIMAT0000692	hsa-miR-30e-5p	ENSG00000179119	SPTY2D1	protein_coding	chr11	18629118	18629123	18629117	18629145	-	9	0	AGO1-4,AGO2	1	0	1	1	0	0	0	3
MIMAT0000692	hsa-miR-30e-5p	ENSG00000179119	SPTY2D1	protein_coding	chr11	18629457	18629462	18629456	18629484	-	2	0	AGO2	1	0	1	1	0	0	0	3
MIMAT0000692	hsa-miR-30e-5p	ENSG00000129173	E2F8	protein_coding	chr11	19245869	19245874	19245869	19245874	-	11	0	AGO1-4,AGO2	1	0	0	0	0	0	0	1
MIMAT0000692	hsa-miR-30e-5p	ENSG00000183161	FANCF	protein_coding	chr11	22645043	22645048	22645042	22645070	-	1	0	AGO1-4	1	0	1	1	0	0	0	3
MIMAT0000692	hsa-miR-30e-5p	ENSG00000183161	FANCF	protein_coding	chr11	22646190	22646195	22646189	22646217	-	22	0	AGO1,AGO1-4,AGO2	1	0	1	1	0	0	1	4
MIMAT0000692	hsa-miR-30e-5p	ENSG00000109881	CCDC34	protein_coding	chr11	27370849	27370854	27370849	27370854	-	2	0	AGO1-4,AGO2	1	0	1	0	0	0	0	2
MIMAT0000692	hsa-miR-30e-5p	ENSG00000109881	CCDC34	protein_coding	chr11	27371382	27371388	27371381	27371404	-	1	0	AGO2	1	0	1	0	1	0	0	3
MIMAT0000692	hsa-miR-30e-5p	ENSG00000148943	LIN7C	protein_coding	chr11	27516630	27516636	27516629	27516657	-	13	0	AGO1,AGO1-4,AGO2	1	0	0	1	1	0	1	4
MIMAT0000692	hsa-miR-30e-5p	ENSG00000176697	BDNF	protein_coding	chr11	27678966	27678971	27678965	27678986	-	1	1	AGO2	1	0	0	0	1	1	1	4
MIMAT0000692	hsa-miR-30e-5p	ENSG00000121621	KIF18A	protein_coding	chr11	28042628	28042633	28042628	28042633	-	1	0	AGO1-4	1	0	0	0	0	0	0	1
MIMAT0000692	hsa-miR-30e-5p	ENSG00000085063	CD59	protein_coding	chr11	33727435	33727440	33727435	33727440	-	1	0	AGO1-4	1	0	0	0	0	0	0	1
MIMAT0000692	hsa-miR-30e-5p	ENSG00000175264	CHST1	protein_coding	chr11	45670951	45670957	45670935	45670978	-	1	0	AGO1-4	1	0	0	2	1	0	1	5
MIMAT0000692	hsa-miR-30e-5p	ENSG00000175216	CKAP5	protein_coding	chr11	46765533	46765538	46765533	46765538	-	3	0	AGO1-4,AGO2	1	0	0	0	0	0	0	1
MIMAT0000692	hsa-miR-30e-5p	ENSG00000165912	PACSIN3	protein_coding	chr11	47199452	47199457	47199452	47199457	-	1	0	AGO1-4	1	0	0	0	0	0	0	1
MIMAT0000692	hsa-miR-30e-5p	ENSG00000134575	ACP2	protein_coding	chr11	47261471	47261478	47261470	47261498	-	9	0	AGO1-4,AGO2	1	0	0	1	1	0	0	3
MIMAT0000692	hsa-miR-30e-5p	ENSG00000149187	CELF1	protein_coding	chr11	47489054	47489061	47489054	47489082	-	4	0	AGO1-4,AGO2	0	0	0	1	0	0	1	2
MIMAT0000692	hsa-miR-30e-5p	ENSG00000149187	CELF1	protein_coding	chr11	47492534	47492540	47492534	47492562	-	5	0	AGO1-4	0	0	0	1	0	0	1	2
MIMAT0000692	hsa-miR-30e-5p	ENSG00000109920	FNBP4	protein_coding	chr11	47738221	47738226	47738221	47738226	-	15	0	AGO1-4,AGO2	1	0	0	0	0	0	0	1
MIMAT0000692	hsa-miR-30e-5p	ENSG00000109920	FNBP4	protein_coding	chr11	47738498	47738503	47738498	47738503	-	4	0	AGO1-4,AGO2	1	0	0	0	0	0	0	1
MIMAT0000692	hsa-miR-30e-5p	ENSG00000166889	PATL1	protein_coding	chr11	59405726	59405732	59405725	59405753	-	6	0	AGO1-4,AGO2	1	0	0	1	1	0	0	3
MIMAT0000692	hsa-miR-30e-5p	ENSG00000149532	CPSF7	protein_coding	chr11	61170394	61170399	61170394	61170399	-	8	0	AGO1,AGO1-4,AGO2	1	0	0	0	0	0	0	1
MIMAT0000692	hsa-miR-30e-5p	ENSG00000124942	AHNAK	protein_coding	chr11	62283922	62283928	62283921	62283942	-	32	0	AGO1-4,AGO2	1	0	0	0	1	0	1	3
MIMAT0000692	hsa-miR-30e-5p	ENSG00000214753	HNRNPUL2	protein_coding	chr11	62480204	62480210	62480204	62480232	-	6	0	AGO1-4,AGO2	0	0	0	1	0	1	1	3
MIMAT0000692	hsa-miR-30e-5p	ENSG00000184743	ATL3	protein_coding	chr11	63393518	63393523	63393517	63393545	-	5	0	AGO1-4	0	0	1	1	0	0	0	2
MIMAT0000692	hsa-miR-30e-5p	ENSG00000184743	ATL3	protein_coding	chr11	63394805	63394811	63394804	63394832	-	18	0	AGO1-4,AGO2	0	0	1	1	0	0	0	2
MIMAT0000692	hsa-miR-30e-5p	ENSG00000184743	ATL3	protein_coding	chr11	63395617	63395622	63395616	63395644	-	3	0	AGO1-4	0	0	1	1	0	0	0	2
MIMAT0000692	hsa-miR-30e-5p	ENSG00000184743	ATL3	protein_coding	chr11	63395994	63395999	63395993	63396021	-	1	0	AGO2	0	0	1	1	0	0	0	2
MIMAT0000692	hsa-miR-30e-5p	ENSG00000184743	ATL3	protein_coding	chr11	63411642	63411670	63411642	63411670	-	8	0	AGO1-4,AGO2	0	0	0	1	0	0	0	1
MIMAT0000692	hsa-miR-30e-5p	ENSG00000149806	FAU	protein_coding	chr11	64888829	64888850	64888829	64888850	-	3	0	AGO1-4	0	0	0	0	1	0	0	1
MIMAT0000692	hsa-miR-30e-5p	ENSG00000173599	PC	protein_coding	chr11	66616021	66616026	66616021	66616026	-	3	0	AGO1,AGO2	1	0	0	0	0	0	0	1
MIMAT0000692	hsa-miR-30e-5p	ENSG00000175505	CLCF1	protein_coding	chr11	67131821	67131826	67131820	67131848	-	5	0	AGO1-4,AGO2	1	0	0	1	0	0	1	3
MIMAT0000692	hsa-miR-30e-5p	ENSG00000110721	CHKA	protein_coding	chr11	67821270	67821276	67821269	67821290	-	3	0	AGO1-4,AGO2	1	0	0	0	1	0	1	3
MIMAT0000692	hsa-miR-30e-5p	ENSG00000165434	PGM2L1	protein_coding	chr11	74047054	74047060	74047053	74047081	-	7	0	AGO1-4,AGO2	1	0	0	1	1	0	1	4
MIMAT0000692	hsa-miR-30e-5p	ENSG00000137492	THAP12	protein_coding	chr11	76061310	76061316	76061309	76061337	-	10	0	AGO1,AGO1-4,AGO2	1	0	0	1	1	0	1	4
MIMAT0000692	hsa-miR-30e-5p	ENSG00000074201	CLNS1A	protein_coding	chr11	77327527	77327532	77327526	77327547	-	6	0	AGO1-4,AGO2	1	0	0	0	1	0	0	2
MIMAT0000692	hsa-miR-30e-5p	ENSG00000048649	RSF1	protein_coding	chr11	77377392	77377398	77377391	77377412	-	3	0	AGO1-4,AGO2	1	0	0	0	1	0	1	3
MIMAT0000692	hsa-miR-30e-5p	ENSG00000151366	NDUFC2	protein_coding	chr11	77780719	77780725	77780718	77780746	-	2	0	AGO1-4	1	0	0	1	1	0	0	3
MIMAT0000692	hsa-miR-30e-5p	ENSG00000137504	CREBZF	protein_coding	chr11	85374823	85374828	85374823	85374828	-	6	0	AGO1,AGO2	1	0	0	0	0	0	0	1
MIMAT0000692	hsa-miR-30e-5p	ENSG00000073921	PICALM	protein_coding	chr11	85668789	85668795	85668788	85668816	-	21	0	AGO1,AGO1-4,AGO2	1	0	1	1	1	0	1	5
MIMAT0000692	hsa-miR-30e-5p	ENSG00000174804	FZD4	protein_coding	chr11	86657938	86657943	86657938	86657943	-	1	0	AGO2	1	0	0	0	0	0	0	1
MIMAT0000692	hsa-miR-30e-5p	ENSG00000110172	CHORDC1	protein_coding	chr11	89935008	89935014	89935007	89935035	-	6	0	AGO1,AGO2,AGO3	1	0	0	1	1	0	0	3
MIMAT0000692	hsa-miR-30e-5p	ENSG00000020922	MRE11	protein_coding	chr11	94153222	94153227	94153222	94153227	-	5	0	AGO1-4	1	0	0	0	0	0	0	1
MIMAT0000692	hsa-miR-30e-5p	ENSG00000170903	MSANTD4	protein_coding	chr11	105878714	105878720	105878713	105878741	-	14	0	AGO1,AGO1-4,AGO2	1	0	0	1	1	0	0	3
MIMAT0000692	hsa-miR-30e-5p	ENSG00000170903	MSANTD4	protein_coding	chr11	105879995	105880000	105879994	105880022	-	9	0	AGO1,AGO1-4,AGO2	1	0	0	1	0	0	1	3
MIMAT0000692	hsa-miR-30e-5p	ENSG00000178202	KDELC2	protein_coding	chr11	108344884	108344889	108344883	108344911	-	14	0	AGO1,AGO2	1	0	1	1	1	0	0	4
MIMAT0000692	hsa-miR-30e-5p	ENSG00000178202	KDELC2	protein_coding	chr11	108344900	108344906	108344899	108344927	-	12	0	AGO1,AGO1-4,AGO2	1	0	1	1	1	0	0	4
MIMAT0000692	hsa-miR-30e-5p	ENSG00000178202	KDELC2	protein_coding	chr11	108356955	108356983	108356955	108356983	-	2	0	AGO1-4,AGO2	0	0	0	1	0	0	0	1
MIMAT0000692	hsa-miR-30e-5p	ENSG00000137710	RDX	protein_coding	chr11	110101806	110101811	110101806	110101811	-	2	0	AGO1-4,AGO2	1	0	0	0	0	0	0	1
MIMAT0000692	hsa-miR-30e-5p	ENSG00000137713	PPP2R1B	protein_coding	chr11	111611265	111611270	111611264	111611292	-	4	0	AGO1-4,AGO2	1	0	1	1	0	0	0	3
MIMAT0000692	hsa-miR-30e-5p	ENSG00000137713	PPP2R1B	protein_coding	chr11	111611934	111611939	111611933	111611961	-	5	0	AGO1,AGO1-4,AGO2	1	0	1	1	0	0	0	3
MIMAT0000692	hsa-miR-30e-5p	ENSG00000086848	ALG9	protein_coding	chr11	111652975	111652981	111652974	111653002	-	12	0	AGO1,AGO2	1	0	0	1	1	0	1	4
MIMAT0000692	hsa-miR-30e-5p	ENSG00000086848	ALG9	protein_coding	chr11	111656040	111656045	111656039	111656067	-	1	0	AGO1-4	1	0	0	1	0	0	0	2
MIMAT0000692	hsa-miR-30e-5p	ENSG00000160584	SIK3	protein_coding	chr11	116714391	116714396	116714390	116714411	-	3	0	AGO1-4,AGO2	1	0	0	0	1	1	1	4
MIMAT0000692	hsa-miR-30e-5p	ENSG00000160588	MPZL3	protein_coding	chr11	118098105	118098133	118098105	118098133	-	1	0	AGO2	0	0	0	1	0	0	0	1
MIMAT0000692	hsa-miR-30e-5p	ENSG00000160588	MPZL3	protein_coding	chr11	118098278	118098306	118098278	118098306	-	5	0	AGO1-4,AGO2	0	0	0	1	0	0	0	1
MIMAT0000692	hsa-miR-30e-5p	ENSG00000149573	MPZL2	protein_coding	chr11	118125540	118125560	118125540	118125560	-	1	0	AGO1-4	0	0	0	0	1	0	0	1
MIMAT0000692	hsa-miR-30e-5p	ENSG00000110367	DDX6	protein_coding	chr11	118621535	118621540	118621535	118621540	-	2	0	AGO1-4	1	0	0	0	0	0	0	1
MIMAT0000692	hsa-miR-30e-5p	ENSG00000036672	USP2	protein_coding	chr11	119226001	119226007	119226000	119226028	-	2	0	AGO2	0	0	0	1	1	1	1	4
MIMAT0000692	hsa-miR-30e-5p	ENSG00000110013	SIAE	protein_coding	chr11	124505774	124505779	124505774	124505779	-	1	0	AGO1-4	1	0	0	0	0	0	0	1
MIMAT0000692	hsa-miR-30e-5p	ENSG00000120458	MSANTD2	protein_coding	chr11	124637636	124637642	124637636	124637642	-	2	0	AGO1,AGO2	0	0	1	0	0	0	1	2
MIMAT0000692	hsa-miR-30e-5p	ENSG00000165526	RPUSD4	protein_coding	chr11	126073212	126073218	126073211	126073232	-	10	0	AGO1-4,AGO2	1	0	0	0	1	0	0	2
MIMAT0000692	hsa-miR-30e-5p	ENSG00000182934	SRPRA	protein_coding	chr11	126133261	126133267	126133260	126133279	-	44	0	AGO1,AGO1-4,AGO2,AGO3,AGO4	1	0	0	0	1	0	0	2
MIMAT0000692	hsa-miR-30e-5p	ENSG00000134909	ARHGAP32	protein_coding	chr11	128837362	128837381	128837362	128837381	-	6	0	AGO1,AGO1-4,AGO2	0	0	0	0	1	0	0	1
MIMAT0000692	hsa-miR-30e-5p	ENSG00000196323	ZBTB44	protein_coding	chr11	130098056	130098062	130098056	130098062	-	3	0	AGO1-4,AGO2	0	0	1	0	0	0	0	1
MIMAT0000692	hsa-miR-30e-5p	ENSG00000196323	ZBTB44	protein_coding	chr11	130099757	130099762	130099757	130099762	-	1	0	AGO1-4	0	0	1	0	0	0	0	1
MIMAT0000692	hsa-miR-30e-5p	ENSG00000196323	ZBTB44	protein_coding	chr11	130102594	130102600	130102594	130102600	-	1	0	AGO1-4	0	0	1	0	0	0	0	1
MIMAT0000692	hsa-miR-30e-5p	ENSG00000196323	ZBTB44	protein_coding	chr11	130103137	130103143	130103137	130103143	-	1	0	AGO2	1	0	1	0	0	0	0	2
MIMAT0000692	hsa-miR-30e-5p	ENSG00000161328	LRRC56	protein_coding	chr11	554869	554874	554869	554874	+	1	0	AGO2	1	0	0	0	0	0	0	1
MIMAT0000692	hsa-miR-30e-5p	ENSG00000177697	CD151	protein_coding	chr11	836114	836135	836114	836135	+	46	0	AGO1,AGO1-4,AGO2,AGO3,AGO4	0	0	0	0	1	0	0	1
MIMAT0000692	hsa-miR-30e-5p	ENSG00000166441	RPL27A	protein_coding	chr11	8708333	8708340	8708320	8708341	+	2	0	AGO2	1	0	0	0	1	0	0	2
MIMAT0000692	hsa-miR-30e-5p	ENSG00000205339	IPO7	protein_coding	chr11	9446488	9446516	9446488	9446516	+	6	0	AGO1,AGO1-4,AGO2,AGO3	0	0	0	1	0	0	0	1
MIMAT0000692	hsa-miR-30e-5p	ENSG00000205339	IPO7	protein_coding	chr11	9468881	9468909	9468881	9468909	+	9	0	AGO1,AGO1-4,AGO2	0	0	0	1	0	0	0	1
MIMAT0000692	hsa-miR-30e-5p	ENSG00000133789	SWAP70	protein_coding	chr11	9772059	9772065	9772042	9772066	+	2	0	AGO1-4,AGO2	1	0	0	0	1	0	0	2
MIMAT0000692	hsa-miR-30e-5p	ENSG00000187079	TEAD1	protein_coding	chr11	12961248	12961253	12961248	12961253	+	4	0	AGO1-4,AGO2	1	0	1	0	0	0	0	2
MIMAT0000692	hsa-miR-30e-5p	ENSG00000187079	TEAD1	protein_coding	chr11	12961290	12961295	12961290	12961295	+	2	0	AGO1-4,AGO2	1	0	1	0	0	0	0	2
MIMAT0000692	hsa-miR-30e-5p	ENSG00000187079	TEAD1	protein_coding	chr11	12962251	12962256	12962251	12962256	+	2	0	AGO1-4	1	0	1	0	0	0	0	2
MIMAT0000692	hsa-miR-30e-5p	ENSG00000187079	TEAD1	protein_coding	chr11	12963868	12963873	12963868	12963873	+	2	0	AGO1-4	1	0	1	0	0	0	0	2
MIMAT0000692	hsa-miR-30e-5p	ENSG00000187079	TEAD1	protein_coding	chr11	12964204	12964209	12964204	12964210	+	3	0	AGO1-4	1	0	1	0	0	0	1	3
MIMAT0000692	hsa-miR-30e-5p	ENSG00000070081	NUCB2	protein_coding	chr11	17316906	17316926	17316906	17316926	+	9	2	AGO1,AGO1-4,AGO2	0	0	0	0	1	0	0	1
MIMAT0000692	hsa-miR-30e-5p	ENSG00000188211	NCR3LG1	protein_coding	chr11	17395821	17395849	17395821	17395849	+	2	0	AGO1,AGO2	0	0	0	1	0	0	0	1
MIMAT0000692	hsa-miR-30e-5p	ENSG00000110768	GTF2H1	protein_coding	chr11	18387716	18387722	18387695	18387723	+	4	0	AGO1-4,AGO2	1	0	0	1	1	0	1	4
MIMAT0000692	hsa-miR-30e-5p	ENSG00000134333	LDHA	protein_coding	chr11	18429131	18429138	18429116	18429139	+	28	0	AGO1-4,AGO2	1	0	0	0	1	0	0	2
MIMAT0000692	hsa-miR-30e-5p	ENSG00000176148	TCP11L1	protein_coding	chr11	33094430	33094435	33094415	33094436	+	7	0	AGO1-4,AGO2	1	0	1	0	1	0	0	3
MIMAT0000692	hsa-miR-30e-5p	ENSG00000176148	TCP11L1	protein_coding	chr11	33095006	33095011	33095006	33095011	+	1	0	AGO2	0	0	1	0	0	0	0	1
MIMAT0000692	hsa-miR-30e-5p	ENSG00000110422	HIPK3	protein_coding	chr11	33377642	33377670	33377642	33377670	+	4	0	AGO1-4	0	0	0	1	0	0	0	1
MIMAT0000692	hsa-miR-30e-5p	ENSG00000121691	CAT	protein_coding	chr11	34493298	34493304	34493277	34493305	+	9	0	AGO1-4,AGO2	1	0	1	1	1	0	1	5
MIMAT0000692	hsa-miR-30e-5p	ENSG00000166326	TRIM44	protein_coding	chr11	35829589	35829595	35829575	35829596	+	3	0	AGO1-4	1	0	0	0	1	0	0	2
MIMAT0000692	hsa-miR-30e-5p	ENSG00000052841	TTC17	protein_coding	chr11	43467925	43467946	43467925	43467946	+	2	0	AGO1-4	0	0	0	0	1	0	0	1
MIMAT0000692	hsa-miR-30e-5p	ENSG00000149084	HSD17B12	protein_coding	chr11	43776607	43776627	43776607	43776627	+	1	0	AGO2	0	0	0	0	1	0	0	1
MIMAT0000692	hsa-miR-30e-5p	ENSG00000181830	SLC35C1	protein_coding	chr11	45833046	45833052	45833025	45833053	+	15	0	AGO1-4,AGO2	1	0	1	1	1	0	0	4
MIMAT0000692	hsa-miR-30e-5p	ENSG00000181830	SLC35C1	protein_coding	chr11	45833082	45833088	45833061	45833089	+	10	0	AGO1-4,AGO2	1	0	1	1	1	0	0	4
MIMAT0000692	hsa-miR-30e-5p	ENSG00000149091	DGKZ	protein_coding	chr11	46402059	46402065	46402038	46402066	+	8	0	AGO1-4,AGO2	1	0	0	1	1	0	1	4
MIMAT0000692	hsa-miR-30e-5p	ENSG00000175224	ATG13	protein_coding	chr11	46695182	46695187	46695182	46695187	+	1	0	AGO1-4	1	0	0	0	0	0	0	1
MIMAT0000692	hsa-miR-30e-5p	ENSG00000149179	C11orf49	protein_coding	chr11	47182926	47182931	47182926	47182931	+	1	0	AGO2	1	0	0	0	0	0	0	1
MIMAT0000692	hsa-miR-30e-5p	ENSG00000242689	CNTF	protein_coding	chr11	58392526	58392531	58392526	58392531	+	1	0	AGO2	1	0	0	0	0	0	0	1
MIMAT0000692	hsa-miR-30e-5p	ENSG00000189057	FAM111B	protein_coding	chr11	58894814	58894819	58894814	58894819	+	2	0	AGO1-4,AGO2	1	0	0	0	0	0	0	1
MIMAT0000692	hsa-miR-30e-5p	ENSG00000166927	MS4A7	protein_coding	chr11	60161467	60161473	60161451	60161474	+	2	0	AGO1-4	1	0	1	0	1	0	0	3
MIMAT0000692	hsa-miR-30e-5p	ENSG00000134780	DAGLA	protein_coding	chr11	61512480	61512486	61512464	61512487	+	1	0	AGO1-4	1	0	0	0	1	0	1	3
MIMAT0000692	hsa-miR-30e-5p	ENSG00000110025	SNX15	protein_coding	chr11	64807827	64807832	64807827	64807832	+	1	0	AGO1-4	1	0	0	0	0	0	0	1
MIMAT0000692	hsa-miR-30e-5p	ENSG00000273003	ARL2-SNX15	protein_coding	chr11	64807827	64807832	64807827	64807832	+	1	0	AGO1-4	1	0	0	0	0	0	0	1
MIMAT0000692	hsa-miR-30e-5p	ENSG00000172818	OVOL1	protein_coding	chr11	65564573	65564579	65564552	65564580	+	4	0	AGO1-4	1	0	1	1	1	0	1	5
MIMAT0000692	hsa-miR-30e-5p	ENSG00000173653	RCE1	protein_coding	chr11	66613764	66613770	66613750	66613771	+	3	0	AGO1-4,AGO2	1	0	0	0	1	0	0	2
MIMAT0000692	hsa-miR-30e-5p	ENSG00000110075	PPP6R3	protein_coding	chr11	68381642	68381648	68381628	68381649	+	4	0	AGO1-4,AGO2	1	0	0	0	1	0	0	2
MIMAT0000692	hsa-miR-30e-5p	ENSG00000110092	CCND1	protein_coding	chr11	69467369	69467374	69467369	69467374	+	7	0	AGO1-4	1	0	0	0	0	0	0	1
MIMAT0000692	hsa-miR-30e-5p	ENSG00000137522	RNF121	protein_coding	chr11	71698103	71698131	71698103	71698131	+	3	0	AGO2	0	0	0	1	0	0	0	1
MIMAT0000692	hsa-miR-30e-5p	ENSG00000175575	PAAF1	protein_coding	chr11	73638709	73638715	73638688	73638716	+	14	0	AGO1-4,AGO2	1	0	1	1	1	0	1	5
MIMAT0000692	hsa-miR-30e-5p	ENSG00000077514	POLD3	protein_coding	chr11	74352248	74352253	74352248	74352253	+	6	0	AGO1-4,AGO2	1	0	0	0	0	0	0	1
MIMAT0000692	hsa-miR-30e-5p	ENSG00000166439	RNF169	protein_coding	chr11	74549821	74549826	74549821	74549826	+	7	0	AGO1-4,AGO2	1	0	0	0	0	0	0	1
MIMAT0000692	hsa-miR-30e-5p	ENSG00000166439	RNF169	protein_coding	chr11	74553081	74553087	74553067	74553088	+	4	0	AGO1-4,AGO2	1	0	0	0	1	0	1	3
MIMAT0000692	hsa-miR-30e-5p	ENSG00000062282	DGAT2	protein_coding	chr11	75512320	75512325	75512320	75512325	+	1	0	AGO2	1	0	0	0	0	0	0	1
MIMAT0000692	hsa-miR-30e-5p	ENSG00000198382	UVRAG	protein_coding	chr11	75853686	75853691	75853686	75853691	+	4	0	AGO1-4,AGO2	1	0	0	0	0	0	0	1
MIMAT0000692	hsa-miR-30e-5p	ENSG00000149260	CAPN5	protein_coding	chr11	76835244	76835250	76835223	76835251	+	2	0	AGO1-4	1	0	0	1	1	0	1	4
MIMAT0000692	hsa-miR-30e-5p	ENSG00000074266	EED	protein_coding	chr11	85989704	85989710	85989683	85989720	+	19	2	AGO1,AGO1-4,AGO2,AGO3	1	0	1	2	1	0	1	6
MIMAT0000692	hsa-miR-30e-5p	ENSG00000074266	EED	protein_coding	chr11	85989713	85989719	85989713	85989720	+	17	1	AGO1,AGO1-4,AGO2,AGO3	1	0	1	0	0	0	1	3
MIMAT0000692	hsa-miR-30e-5p	ENSG00000166575	TMEM135	protein_coding	chr11	87034029	87034035	87034015	87034036	+	2	0	AGO2	1	0	0	0	1	0	1	3
MIMAT0000692	hsa-miR-30e-5p	ENSG00000182919	C11orf54	protein_coding	chr11	93495626	93495631	93495626	93495631	+	1	0	AGO2	1	0	0	0	0	0	0	1
MIMAT0000692	hsa-miR-30e-5p	ENSG00000196371	FUT4	protein_coding	chr11	94279813	94279819	94279792	94279820	+	1	0	AGO1-4	1	0	0	1	1	0	1	4
MIMAT0000692	hsa-miR-30e-5p	ENSG00000166025	AMOTL1	protein_coding	chr11	94609108	94609114	94609087	94609115	+	4	3	AGO1-4,AGO2	1	0	1	1	0	0	0	3
MIMAT0000692	hsa-miR-30e-5p	ENSG00000166025	AMOTL1	protein_coding	chr11	94609272	94609278	94609251	94609279	+	18	0	AGO1-4,AGO2,AGO3	1	0	1	1	0	0	1	4
MIMAT0000692	hsa-miR-30e-5p	ENSG00000149218	ENDOD1	protein_coding	chr11	94862947	94862953	94862947	94862953	+	1	0	AGO2	1	0	0	0	0	0	0	1
MIMAT0000692	hsa-miR-30e-5p	ENSG00000137693	YAP1	protein_coding	chr11	102101995	102102000	102101995	102102000	+	5	0	AGO1-4,AGO2	1	0	0	0	0	0	0	1
MIMAT0000692	hsa-miR-30e-5p	ENSG00000149313	AASDHPPT	protein_coding	chr11	105967811	105967818	105967791	105967819	+	8	0	AGO1,AGO1-4,AGO2	1	0	0	1	1	0	0	3
MIMAT0000692	hsa-miR-30e-5p	ENSG00000149313	AASDHPPT	protein_coding	chr11	105968602	105968607	105968580	105968608	+	8	0	AGO1-4,AGO2	1	0	0	1	0	0	0	2
MIMAT0000692	hsa-miR-30e-5p	ENSG00000149311	ATM	protein_coding	chr11	108239497	108239503	108239497	108239503	+	4	0	AGO1-4,AGO2	1	0	0	0	0	0	0	1
MIMAT0000692	hsa-miR-30e-5p	ENSG00000137714	FDX1	protein_coding	chr11	110333495	110333501	110333481	110333502	+	1	0	AGO2	1	0	0	0	1	0	0	2
MIMAT0000692	hsa-miR-30e-5p	ENSG00000150776	NKAPD1	protein_coding	chr11	111954207	111954212	111954207	111954212	+	1	0	AGO2	1	0	0	0	0	0	0	1
MIMAT0000692	hsa-miR-30e-5p	ENSG00000149294	NCAM1	protein_coding	chr11	113135876	113135881	113135876	113135881	+	1	0	AGO2	1	0	0	0	0	0	0	1
MIMAT0000692	hsa-miR-30e-5p	ENSG00000149294	NCAM1	protein_coding	chr11	113146831	113146836	113146809	113146837	+	3	0	AGO1-4,AGO2	1	0	1	1	1	1	1	6
MIMAT0000692	hsa-miR-30e-5p	ENSG00000168092	PAFAH1B2	protein_coding	chr11	117040380	117040386	117040359	117040400	+	2	1	AGO2	0	0	1	2	2	0	1	6
MIMAT0000692	hsa-miR-30e-5p	ENSG00000168092	PAFAH1B2	protein_coding	chr11	117040393	117040399	117040393	117040399	+	2	0	AGO2	0	0	1	0	0	0	1	2
MIMAT0000692	hsa-miR-30e-5p	ENSG00000168092	PAFAH1B2	protein_coding	chr11	117041402	117041408	117041381	117041409	+	24	0	AGO1,AGO1-4,AGO2	0	0	1	1	1	0	1	4
MIMAT0000692	hsa-miR-30e-5p	ENSG00000149577	SIDT2	protein_coding	chr11	117067878	117067883	117067856	117067884	+	2	0	AGO1-4	1	0	0	1	0	0	1	3
MIMAT0000692	hsa-miR-30e-5p	ENSG00000110344	UBE4A	protein_coding	chr11	118268097	118268104	118268081	118268105	+	6	0	AGO1,AGO1-4,AGO2	1	0	0	0	1	0	0	2
MIMAT0000692	hsa-miR-30e-5p	ENSG00000118058	KMT2A	protein_coding	chr11	118393127	118393133	118393106	118393134	+	7	0	AGO2	1	0	1	1	1	0	0	4
MIMAT0000692	hsa-miR-30e-5p	ENSG00000118058	KMT2A	protein_coding	chr11	118394251	118394257	118394230	118394265	+	18	0	AGO1-4,AGO2	1	0	1	2	1	0	1	6
MIMAT0000692	hsa-miR-30e-5p	ENSG00000118058	KMT2A	protein_coding	chr11	118394259	118394264	118394259	118394264	+	15	0	AGO1-4,AGO2	1	0	1	0	0	0	0	2
MIMAT0000692	hsa-miR-30e-5p	ENSG00000095139	ARCN1	protein_coding	chr11	118472235	118472241	118472214	118472242	+	16	0	AGO1-4,AGO2	1	0	0	0	1	0	0	2
MIMAT0000692	hsa-miR-30e-5p	ENSG00000173456	RNF26	protein_coding	chr11	119207726	119207731	119207726	119207731	+	2	0	AGO1,AGO1-4	1	0	0	0	0	0	0	1
MIMAT0000692	hsa-miR-30e-5p	ENSG00000154114	TBCEL	protein_coding	chr11	120959202	120959223	120959202	120959223	+	4	0	AGO1-4,AGO2	0	0	0	0	1	0	0	1
MIMAT0000692	hsa-miR-30e-5p	ENSG00000154144	TBRG1	protein_coding	chr11	124502337	124502343	124502323	124502344	+	3	0	AGO1,AGO2	1	0	1	0	1	0	0	3
MIMAT0000692	hsa-miR-30e-5p	ENSG00000154144	TBRG1	protein_coding	chr11	124503231	124503236	124503231	124503236	+	8	0	AGO2	1	0	1	0	0	0	0	2
MIMAT0000692	hsa-miR-30e-5p	ENSG00000110074	FOXRED1	protein_coding	chr11	126147979	126147985	126147965	126147986	+	5	0	AGO2	1	0	0	0	1	0	0	2
MIMAT0000692	hsa-miR-30e-5p	ENSG00000084234	APLP2	protein_coding	chr11	130014119	130014125	130014105	130014126	+	17	0	AGO1-4,AGO2	1	0	0	0	1	0	0	2
MIMAT0000692	hsa-miR-30e-5p	ENSG00000166086	JAM3	protein_coding	chr11	134020021	134020026	134020021	134020026	+	1	0	AGO1-4	1	0	0	0	0	0	0	1
MIMAT0000692	hsa-miR-30e-5p	ENSG00000151502	VPS26B	protein_coding	chr11	134116736	134116742	134116715	134116743	+	3	0	AGO2	1	0	0	1	1	0	0	3
MIMAT0000692	hsa-miR-30e-5p	ENSG00000151502	VPS26B	protein_coding	chr11	134117559	134117565	134117538	134117566	+	3	0	AGO1-4	1	0	0	1	1	0	1	4
MIMAT0000692	hsa-miR-30e-5p	ENSG00000073614	KDM5A	protein_coding	chr12	394371	394376	394371	394376	-	2	0	AGO2	1	0	0	0	0	0	0	1
MIMAT0000692	hsa-miR-30e-5p	ENSG00000171823	FBXL14	protein_coding	chr12	1675280	1675286	1675279	1675307	-	2	0	AGO1-4,AGO2	1	0	1	1	1	0	1	5
MIMAT0000692	hsa-miR-30e-5p	ENSG00000111224	PARP11	protein_coding	chr12	3920975	3920980	3920975	3920980	-	1	0	AGO1-4	1	0	0	0	0	0	0	1
MIMAT0000692	hsa-miR-30e-5p	ENSG00000089693	MLF2	protein_coding	chr12	6857537	6857542	6857537	6857542	-	14	0	AGO1-4,AGO2	1	0	0	0	0	0	0	1
MIMAT0000692	hsa-miR-30e-5p	ENSG00000173262	SLC2A14	protein_coding	chr12	7965756	7965784	7965756	7965784	-	10	0	AGO1-4,AGO2	0	0	0	1	0	0	0	1
MIMAT0000692	hsa-miR-30e-5p	ENSG00000173262	SLC2A14	protein_coding	chr12	7966099	7966127	7966099	7966127	-	7	0	AGO1-4,AGO2	0	0	0	1	0	0	0	1
MIMAT0000692	hsa-miR-30e-5p	ENSG00000059804	SLC2A3	protein_coding	chr12	8073112	8073117	8073112	8073117	-	8	0	AGO1-4,AGO2	1	0	0	0	0	0	0	1
MIMAT0000692	hsa-miR-30e-5p	ENSG00000060138	YBX3	protein_coding	chr12	10852126	10852132	10852125	10852153	-	5	1	AGO1,AGO1-4,AGO2	1	0	1	1	1	0	0	4
MIMAT0000692	hsa-miR-30e-5p	ENSG00000070018	LRP6	protein_coding	chr12	12271876	12271882	12271875	12271903	-	7	0	AGO1,AGO1-4,AGO2	1	0	0	1	1	0	1	4
MIMAT0000692	hsa-miR-30e-5p	ENSG00000070018	LRP6	protein_coding	chr12	12273328	12273335	12273327	12273355	-	1	0	AGO1-4	1	0	0	1	0	0	0	2
MIMAT0000692	hsa-miR-30e-5p	ENSG00000070018	LRP6	protein_coding	chr12	12318136	12318164	12318136	12318164	-	4	0	AGO1-4,AGO2	0	0	0	1	0	0	0	1
MIMAT0000692	hsa-miR-30e-5p	ENSG00000048540	LMO3	protein_coding	chr12	16713384	16713412	16713384	16713412	-	1	0	AGO2	0	0	0	1	0	0	0	1
MIMAT0000692	hsa-miR-30e-5p	ENSG00000069431	ABCC9	protein_coding	chr12	21951010	21951016	21951009	21951037	-	1	0	AGO1-4	1	0	1	1	1	0	1	5
MIMAT0000692	hsa-miR-30e-5p	ENSG00000133703	KRAS	protein_coding	chr12	25358477	25358483	25358476	25358504	-	17	0	AGO1,AGO1-4,AGO2,AGO3	1	0	0	1	1	1	1	5
MIMAT0000692	hsa-miR-30e-5p	ENSG00000064115	TM7SF3	protein_coding	chr12	27126637	27126642	27126636	27126657	-	7	0	AGO1-4,AGO2	1	0	0	0	1	0	0	2
MIMAT0000692	hsa-miR-30e-5p	ENSG00000133687	TMTC1	protein_coding	chr12	29654368	29654396	29654368	29654396	-	1	0	AGO2	0	0	0	1	0	0	0	1
MIMAT0000692	hsa-miR-30e-5p	ENSG00000170456	DENND5B	protein_coding	chr12	31536092	31536097	31536091	31536097	-	1	0	AGO2	1	0	0	0	0	0	1	2
MIMAT0000692	hsa-miR-30e-5p	ENSG00000151743	AMN1	protein_coding	chr12	31824871	31824876	31824871	31824876	-	1	0	AGO2	1	0	0	0	0	0	0	1
MIMAT0000692	hsa-miR-30e-5p	ENSG00000188375	H3F3C	protein_coding	chr12	31944540	31944546	31944539	31944562	-	6	0	AGO1-4,AGO2	1	0	0	0	1	0	0	2
MIMAT0000692	hsa-miR-30e-5p	ENSG00000139117	CPNE8	protein_coding	chr12	39047302	39047308	39047301	39047329	-	4	0	AGO2	1	0	0	1	1	0	1	4
MIMAT0000692	hsa-miR-30e-5p	ENSG00000151233	GXYLT1	protein_coding	chr12	42478235	42478240	42478234	42478262	-	1	0	AGO1-4	1	0	0	1	0	0	0	2
MIMAT0000692	hsa-miR-30e-5p	ENSG00000151233	GXYLT1	protein_coding	chr12	42481158	42481164	42481157	42481185	-	30	0	AGO1,AGO1-4,AGO2	1	0	0	1	1	0	1	4
MIMAT0000692	hsa-miR-30e-5p	ENSG00000151233	GXYLT1	protein_coding	chr12	42491294	42491322	42491294	42491322	-	2	0	AGO1-4	0	0	0	1	0	0	0	1
MIMAT0000692	hsa-miR-30e-5p	ENSG00000015153	YAF2	protein_coding	chr12	42553224	42553230	42553223	42553244	-	2	0	AGO1-4,AGO2	1	0	1	0	1	0	1	4
MIMAT0000692	hsa-miR-30e-5p	ENSG00000015153	YAF2	protein_coding	chr12	42553328	42553333	42553328	42553333	-	3	0	AGO1-4,AGO2	1	0	1	0	0	0	0	2
MIMAT0000692	hsa-miR-30e-5p	ENSG00000139168	ZCRB1	protein_coding	chr12	42706678	42706684	42706677	42706705	-	10	0	AGO1,AGO1-4,AGO2	1	0	0	1	1	0	0	3
MIMAT0000692	hsa-miR-30e-5p	ENSG00000139174	PRICKLE1	protein_coding	chr12	42853471	42853477	42853470	42853498	-	4	0	AGO1-4,AGO2	1	0	0	1	1	0	1	4
MIMAT0000692	hsa-miR-30e-5p	ENSG00000151239	TWF1	protein_coding	chr12	44187669	44187674	44187668	44187696	-	6	1	AGO1,AGO2	1	0	1	1	1	0	0	4
MIMAT0000692	hsa-miR-30e-5p	ENSG00000151239	TWF1	protein_coding	chr12	44187997	44188003	44187996	44188024	-	22	0	AGO1,AGO1-4,AGO2	1	0	1	1	1	0	1	5
MIMAT0000692	hsa-miR-30e-5p	ENSG00000151239	TWF1	protein_coding	chr12	44188060	44188066	44188059	44188087	-	11	0	AGO1-4,AGO2	1	0	1	1	1	0	1	5
MIMAT0000692	hsa-miR-30e-5p	ENSG00000139218	SCAF11	protein_coding	chr12	46315170	46315176	46315169	46315190	-	2	0	AGO2	1	0	0	0	1	0	0	2
MIMAT0000692	hsa-miR-30e-5p	ENSG00000111371	SLC38A1	protein_coding	chr12	46578188	46578193	46578188	46578193	-	3	0	AGO1-4,AGO2	1	0	0	0	0	0	0	1
MIMAT0000692	hsa-miR-30e-5p	ENSG00000111371	SLC38A1	protein_coding	chr12	46582663	46582668	46582662	46582668	-	9	0	AGO1,AGO1-4,AGO2	1	0	0	0	0	0	1	2
MIMAT0000692	hsa-miR-30e-5p	ENSG00000134294	SLC38A2	protein_coding	chr12	46753603	46753609	46753602	46753630	-	34	0	AGO1,AGO1-4,AGO2	1	0	0	1	1	0	1	4
MIMAT0000692	hsa-miR-30e-5p	ENSG00000139209	SLC38A4	protein_coding	chr12	47160010	47160016	47160009	47160030	-	1	0	AGO1-4	1	0	0	0	1	0	0	2
MIMAT0000692	hsa-miR-30e-5p	ENSG00000139209	SLC38A4	protein_coding	chr12	47160359	47160364	47160359	47160364	-	1	0	AGO1-4	1	0	0	0	0	0	0	1
MIMAT0000692	hsa-miR-30e-5p	ENSG00000005175	RPAP3	protein_coding	chr12	48056273	48056294	48056273	48056294	-	2	0	AGO1-4	0	0	0	0	1	0	0	1
MIMAT0000692	hsa-miR-30e-5p	ENSG00000111424	VDR	protein_coding	chr12	48237255	48237260	48237255	48237260	-	2	0	AGO1-4	1	0	0	0	0	0	0	1
MIMAT0000692	hsa-miR-30e-5p	ENSG00000167548	KMT2D	protein_coding	chr12	49413120	49413125	49413119	49413147	-	14	0	AGO1-4,AGO2	1	0	0	1	0	0	1	3
MIMAT0000692	hsa-miR-30e-5p	ENSG00000167550	RHEBL1	protein_coding	chr12	49458699	49458705	49458698	49458726	-	14	0	AGO1-4,AGO2	1	0	0	1	1	0	1	4
MIMAT0000692	hsa-miR-30e-5p	ENSG00000139636	LMBR1L	protein_coding	chr12	49491143	49491149	49491142	49491170	-	31	0	AGO1,AGO1-4,AGO2,AGO3	1	0	0	1	1	0	1	4
MIMAT0000692	hsa-miR-30e-5p	ENSG00000139636	LMBR1L	protein_coding	chr12	49491194	49491200	49491193	49491221	-	26	0	AGO1,AGO1-4,AGO2,AGO3	1	0	0	1	1	0	0	3
MIMAT0000692	hsa-miR-30e-5p	ENSG00000110911	SLC11A2	protein_coding	chr12	51382048	51382053	51382048	51382053	-	6	0	AGO1-4,AGO2	1	0	0	0	0	0	0	1
MIMAT0000692	hsa-miR-30e-5p	ENSG00000139629	GALNT6	protein_coding	chr12	51747071	51747077	51747070	51747094	-	1	0	AGO1-4	1	0	0	0	1	0	0	2
MIMAT0000692	hsa-miR-30e-5p	ENSG00000170421	KRT8	protein_coding	chr12	53291071	53291076	53291071	53291076	-	7	0	AGO1-4,AGO2	1	0	0	0	0	0	0	1
MIMAT0000692	hsa-miR-30e-5p	ENSG00000167778	SPRYD3	protein_coding	chr12	53459528	53459533	53459528	53459533	-	3	0	AGO1,AGO1-4	1	0	0	0	0	0	0	1
MIMAT0000692	hsa-miR-30e-5p	ENSG00000139631	CSAD	protein_coding	chr12	53551769	53551775	53551768	53551796	-	1	0	AGO2	1	0	1	1	1	0	1	5
MIMAT0000692	hsa-miR-30e-5p	ENSG00000172819	RARG	protein_coding	chr12	53604426	53604432	53604425	53604453	-	15	0	AGO1,AGO1-4,AGO2	1	0	0	1	1	0	1	4
MIMAT0000692	hsa-miR-30e-5p	ENSG00000172819	RARG	protein_coding	chr12	53604599	53604605	53604598	53604626	-	13	0	AGO1-4,AGO2	1	0	0	1	1	0	1	4
MIMAT0000692	hsa-miR-30e-5p	ENSG00000139625	MAP3K12	protein_coding	chr12	53874562	53874568	53874561	53874582	-	8	0	AGO1,AGO2	1	0	0	0	1	0	1	3
MIMAT0000692	hsa-miR-30e-5p	ENSG00000139625	MAP3K12	protein_coding	chr12	53874571	53874576	53874571	53874576	-	1	0	AGO2	1	0	0	0	0	0	0	1
MIMAT0000692	hsa-miR-30e-5p	ENSG00000170653	ATF7	protein_coding	chr12	53909936	53909941	53909936	53909941	-	3	0	AGO1-4,AGO2	1	0	0	0	0	0	0	1
MIMAT0000692	hsa-miR-30e-5p	ENSG00000012822	CALCOCO1	protein_coding	chr12	54105294	54105299	54105294	54105299	-	1	0	AGO1-4	1	0	0	0	0	0	0	1
MIMAT0000692	hsa-miR-30e-5p	ENSG00000123415	SMUG1	protein_coding	chr12	54575512	54575517	54575512	54575517	-	11	0	AGO1,AGO1-4,AGO2	1	0	0	0	0	0	0	1
MIMAT0000692	hsa-miR-30e-5p	ENSG00000161638	ITGA5	protein_coding	chr12	54789866	54789872	54789865	54789893	-	13	0	AGO1-4,AGO2	1	0	0	1	1	0	0	3
MIMAT0000692	hsa-miR-30e-5p	ENSG00000123342	MMP19	protein_coding	chr12	56231079	56231085	56231078	56231101	-	1	0	AGO1-4	0	0	0	0	1	0	1	2
MIMAT0000692	hsa-miR-30e-5p	ENSG00000139645	ANKRD52	protein_coding	chr12	56635340	56635345	56635339	56635345	-	12	0	AGO1,AGO1-4,AGO2	1	0	0	0	0	0	1	2
MIMAT0000692	hsa-miR-30e-5p	ENSG00000166860	ZBTB39	protein_coding	chr12	57392767	57392773	57392766	57392794	-	24	0	AGO1,AGO1-4,AGO2,AGO3	1	0	1	1	1	0	1	5
MIMAT0000692	hsa-miR-30e-5p	ENSG00000166860	ZBTB39	protein_coding	chr12	57393741	57393746	57393740	57393768	-	3	0	AGO2	1	0	1	1	0	0	0	3
MIMAT0000692	hsa-miR-30e-5p	ENSG00000166860	ZBTB39	protein_coding	chr12	57395478	57395484	57395477	57395505	-	8	0	AGO1-4,AGO2	1	0	1	1	0	0	1	4
MIMAT0000692	hsa-miR-30e-5p	ENSG00000166860	ZBTB39	protein_coding	chr12	57396237	57396242	57396236	57396264	-	12	0	AGO1-4,AGO2	1	0	1	1	0	0	0	3
MIMAT0000692	hsa-miR-30e-5p	ENSG00000198673	FAM19A2	protein_coding	chr12	62103365	62103372	62103364	62103385	-	1	0	AGO2	1	0	0	0	1	0	0	2
MIMAT0000692	hsa-miR-30e-5p	ENSG00000111110	PPM1H	protein_coding	chr12	63039130	63039136	63039130	63039136	-	2	0	AGO1-4	1	0	0	0	0	0	0	1
MIMAT0000692	hsa-miR-30e-5p	ENSG00000174206	C12orf66	protein_coding	chr12	64587536	64587541	64587536	64587541	-	3	0	AGO1-4,AGO2	1	0	0	0	0	0	0	1
MIMAT0000692	hsa-miR-30e-5p	ENSG00000127324	TSPAN8	protein_coding	chr12	71526478	71526506	71526478	71526506	-	1	0	AGO2	0	0	0	1	0	0	0	1
MIMAT0000692	hsa-miR-30e-5p	ENSG00000127324	TSPAN8	protein_coding	chr12	71551417	71551445	71551417	71551445	-	2	0	AGO2	0	0	0	1	0	0	0	1
MIMAT0000692	hsa-miR-30e-5p	ENSG00000133858	ZFC3H1	protein_coding	chr12	72003797	72003803	72003796	72003824	-	8	1	AGO1-4,AGO2	1	0	0	1	1	0	1	4
MIMAT0000692	hsa-miR-30e-5p	ENSG00000133858	ZFC3H1	protein_coding	chr12	72005601	72005629	72005601	72005629	-	2	0	AGO1-4,AGO2	0	0	0	1	0	0	0	1
MIMAT0000692	hsa-miR-30e-5p	ENSG00000133858	ZFC3H1	protein_coding	chr12	72050264	72050269	72050264	72050269	-	1	0	AGO1-4	0	0	1	0	0	0	0	1
MIMAT0000692	hsa-miR-30e-5p	ENSG00000133858	ZFC3H1	protein_coding	chr12	72050500	72050506	72050499	72050520	-	3	0	AGO1,AGO2	0	0	1	0	1	0	0	2
MIMAT0000692	hsa-miR-30e-5p	ENSG00000187109	NAP1L1	protein_coding	chr12	76441013	76441019	76441013	76441019	-	53	0	AGO1,AGO1-4,AGO2,AGO3,AGO4	1	0	1	0	0	0	1	3
MIMAT0000692	hsa-miR-30e-5p	ENSG00000187109	NAP1L1	protein_coding	chr12	76441043	76441049	76441042	76441063	-	37	0	AGO1,AGO1-4,AGO2	1	0	1	0	1	0	0	3
MIMAT0000692	hsa-miR-30e-5p	ENSG00000179941	BBS10	protein_coding	chr12	76739006	76739011	76739006	76739011	-	3	0	AGO1-4,AGO2	1	0	1	0	0	0	0	2
MIMAT0000692	hsa-miR-30e-5p	ENSG00000091039	OSBPL8	protein_coding	chr12	76746326	76746331	76746325	76746353	-	3	0	AGO1,AGO2	1	0	1	1	0	0	0	3
MIMAT0000692	hsa-miR-30e-5p	ENSG00000165891	E2F7	protein_coding	chr12	77415334	77415339	77415333	77415361	-	31	0	AGO1,AGO1-4,AGO2,AGO3	1	0	1	1	1	0	1	5
MIMAT0000692	hsa-miR-30e-5p	ENSG00000165891	E2F7	protein_coding	chr12	77416128	77416133	77416105	77416155	-	12	0	AGO1,AGO2	1	0	1	2	1	0	1	6
MIMAT0000692	hsa-miR-30e-5p	ENSG00000165891	E2F7	protein_coding	chr12	77417276	77417281	77417275	77417303	-	26	0	AGO1,AGO1-4,AGO2,AGO3	1	0	1	1	0	0	1	4
MIMAT0000692	hsa-miR-30e-5p	ENSG00000177425	PAWR	protein_coding	chr12	79982341	79982369	79982341	79982369	-	1	0	AGO1-4	0	0	0	1	0	0	0	1
MIMAT0000692	hsa-miR-30e-5p	ENSG00000177425	PAWR	protein_coding	chr12	79986032	79986038	79986031	79986059	-	21	0	AGO1,AGO1-4,AGO2,AGO3	1	0	0	1	1	0	1	4
MIMAT0000692	hsa-miR-30e-5p	ENSG00000058272	PPP1R12A	protein_coding	chr12	80169424	80169429	80169423	80169451	-	17	0	AGO1,AGO1-4,AGO2	1	0	0	1	1	1	1	5
MIMAT0000692	hsa-miR-30e-5p	ENSG00000072041	SLC6A15	protein_coding	chr12	85255230	85255235	85255229	85255235	-	1	0	AGO2	1	0	0	0	0	0	1	2
MIMAT0000692	hsa-miR-30e-5p	ENSG00000257594	GALNT4	protein_coding	chr12	89913518	89913524	89913517	89913538	-	1	0	AGO2	1	0	0	0	1	0	0	2
MIMAT0000692	hsa-miR-30e-5p	ENSG00000259075	POC1B-GALNT4	protein_coding	chr12	89913518	89913524	89913517	89913538	-	1	0	AGO2	1	0	0	0	1	0	0	2
MIMAT0000692	hsa-miR-30e-5p	ENSG00000257594	GALNT4	protein_coding	chr12	89914844	89914849	89914844	89914849	-	4	0	AGO1-4,AGO2	1	0	0	0	0	0	0	1
MIMAT0000692	hsa-miR-30e-5p	ENSG00000259075	POC1B-GALNT4	protein_coding	chr12	89914844	89914849	89914844	89914849	-	4	0	AGO1-4,AGO2	1	0	0	0	0	0	0	1
MIMAT0000692	hsa-miR-30e-5p	ENSG00000070961	ATP2B1	protein_coding	chr12	89983035	89983040	89983034	89983062	-	3	0	AGO1-4	1	0	0	1	0	0	0	2
MIMAT0000692	hsa-miR-30e-5p	ENSG00000070961	ATP2B1	protein_coding	chr12	89984309	89984315	89984308	89984336	-	9	0	AGO1,AGO1-4,AGO2	1	0	0	1	1	0	1	4
MIMAT0000692	hsa-miR-30e-5p	ENSG00000102189	EEA1	protein_coding	chr12	93166510	93166516	93166509	93166537	-	4	0	AGO1-4,AGO2	1	0	1	1	1	0	1	5
MIMAT0000692	hsa-miR-30e-5p	ENSG00000102189	EEA1	protein_coding	chr12	93167782	93167788	93167781	93167809	-	2	0	AGO2	1	0	1	1	1	0	0	4
MIMAT0000692	hsa-miR-30e-5p	ENSG00000102189	EEA1	protein_coding	chr12	93169101	93169107	93169100	93169128	-	4	0	AGO2	1	0	1	1	1	0	0	4
MIMAT0000692	hsa-miR-30e-5p	ENSG00000184752	NDUFA12	protein_coding	chr12	95365147	95365153	95365146	95365167	-	18	0	AGO1,AGO1-4,AGO2	1	0	1	0	1	0	0	3
MIMAT0000692	hsa-miR-30e-5p	ENSG00000180263	FGD6	protein_coding	chr12	95475086	95475092	95475085	95475113	-	3	0	AGO1-4,AGO2	1	0	1	1	1	0	1	5
MIMAT0000692	hsa-miR-30e-5p	ENSG00000136014	USP44	protein_coding	chr12	95911714	95911720	95911713	95911741	-	2	0	AGO2	1	0	0	1	1	0	1	4
MIMAT0000692	hsa-miR-30e-5p	ENSG00000136014	USP44	protein_coding	chr12	95927383	95927411	95927383	95927411	-	1	0	AGO2	0	0	0	1	0	0	0	1
MIMAT0000692	hsa-miR-30e-5p	ENSG00000059758	CDK17	protein_coding	chr12	96672961	96672967	96672960	96672981	-	2	0	AGO2	1	0	0	0	1	0	0	2
MIMAT0000692	hsa-miR-30e-5p	ENSG00000166130	IKBIP	protein_coding	chr12	99018064	99018070	99018063	99018084	-	11	0	AGO1,AGO1-4,AGO2	1	0	1	0	1	0	0	3
MIMAT0000692	hsa-miR-30e-5p	ENSG00000166130	IKBIP	protein_coding	chr12	99018889	99018894	99018889	99018894	-	1	0	AGO2	1	0	1	0	0	0	0	2
MIMAT0000692	hsa-miR-30e-5p	ENSG00000111696	NT5DC3	protein_coding	chr12	104169175	104169181	104169175	104169181	-	4	0	AGO1-4,AGO2	1	0	1	0	0	0	1	3
MIMAT0000692	hsa-miR-30e-5p	ENSG00000111696	NT5DC3	protein_coding	chr12	104171355	104171361	104171355	104171361	-	1	0	AGO1-4	1	0	1	0	0	0	0	2
MIMAT0000692	hsa-miR-30e-5p	ENSG00000120837	NFYB	protein_coding	chr12	104512868	104512874	104512867	104512895	-	3	0	AGO2	1	0	0	1	1	0	1	4
MIMAT0000692	hsa-miR-30e-5p	ENSG00000120837	NFYB	protein_coding	chr12	104514195	104514223	104514195	104514223	-	5	0	AGO1,AGO2	0	0	0	1	0	0	0	1
MIMAT0000692	hsa-miR-30e-5p	ENSG00000136052	SLC41A2	protein_coding	chr12	105198647	105198652	105198646	105198674	-	2	0	AGO1-4,AGO2	1	0	0	1	1	1	1	5
MIMAT0000692	hsa-miR-30e-5p	ENSG00000136052	SLC41A2	protein_coding	chr12	105255084	105255112	105255084	105255112	-	2	0	AGO1-4,AGO2	0	0	0	1	0	0	0	1
MIMAT0000692	hsa-miR-30e-5p	ENSG00000136044	APPL2	protein_coding	chr12	105593227	105593255	105593227	105593255	-	6	0	AGO1-4,AGO2	0	0	0	1	0	0	0	1
MIMAT0000692	hsa-miR-30e-5p	ENSG00000084112	SSH1	protein_coding	chr12	109177189	109177195	109177189	109177195	-	8	0	AGO1-4,AGO2	0	0	0	0	0	0	1	1
MIMAT0000692	hsa-miR-30e-5p	ENSG00000174456	C12orf76	protein_coding	chr12	110479318	110479324	110479317	110479335	-	16	0	AGO1,AGO1-4,AGO2	1	0	0	0	1	0	1	3
MIMAT0000692	hsa-miR-30e-5p	ENSG00000111237	VPS29	protein_coding	chr12	110929622	110929627	110929621	110929642	-	2	0	AGO1-4,AGO2	1	0	0	0	1	0	0	2
MIMAT0000692	hsa-miR-30e-5p	ENSG00000196850	PPTC7	protein_coding	chr12	110973682	110973688	110973681	110973709	-	6	0	AGO1-4,AGO2	1	0	0	1	1	0	1	4
MIMAT0000692	hsa-miR-30e-5p	ENSG00000186298	PPP1CC	protein_coding	chr12	111159127	111159133	111159127	111159133	-	1	0	AGO2	0	0	1	0	0	0	0	1
MIMAT0000692	hsa-miR-30e-5p	ENSG00000186298	PPP1CC	protein_coding	chr12	111159584	111159590	111159584	111159590	-	1	0	AGO2	0	0	1	0	0	0	0	1
MIMAT0000692	hsa-miR-30e-5p	ENSG00000186298	PPP1CC	protein_coding	chr12	111159898	111159904	111159898	111159904	-	6	0	AGO1,AGO2	0	0	1	0	0	0	0	1
MIMAT0000692	hsa-miR-30e-5p	ENSG00000198324	FAM109A	protein_coding	chr12	111799293	111799298	111799292	111799320	-	3	0	AGO1-4,AGO2	1	0	0	1	1	1	1	5
MIMAT0000692	hsa-miR-30e-5p	ENSG00000089234	BRAP	protein_coding	chr12	112081106	112081113	112081106	112081134	-	5	0	AGO1-4,AGO2	0	0	0	1	1	0	1	3
MIMAT0000692	hsa-miR-30e-5p	ENSG00000111300	NAA25	protein_coding	chr12	112464927	112464933	112464926	112464954	-	9	0	AGO1-4,AGO2	1	0	0	1	1	0	1	4
MIMAT0000692	hsa-miR-30e-5p	ENSG00000111300	NAA25	protein_coding	chr12	112466237	112466243	112466236	112466264	-	3	0	AGO1,AGO2	1	0	0	1	1	0	0	3
MIMAT0000692	hsa-miR-30e-5p	ENSG00000135108	FBXO21	protein_coding	chr12	117582344	117582350	117582343	117582364	-	1	0	AGO1-4	1	0	0	0	1	0	0	2
MIMAT0000692	hsa-miR-30e-5p	ENSG00000122966	CIT	protein_coding	chr12	120125380	120125387	120125379	120125399	-	2	0	AGO1-4,AGO2	1	0	0	0	1	0	0	2
MIMAT0000692	hsa-miR-30e-5p	ENSG00000170855	TRIAP1	protein_coding	chr12	120881832	120881838	120881831	120881851	-	17	4	AGO1-4,AGO2,AGO3	1	0	0	0	1	0	0	2
MIMAT0000692	hsa-miR-30e-5p	ENSG00000110871	COQ5	protein_coding	chr12	120941089	120941094	120941089	120941094	-	1	0	AGO1-4	1	0	0	0	0	0	0	1
MIMAT0000692	hsa-miR-30e-5p	ENSG00000157837	SPPL3	protein_coding	chr12	121201558	121201563	121201558	121201563	-	1	0	AGO2	1	0	0	0	0	0	0	1
MIMAT0000692	hsa-miR-30e-5p	ENSG00000157837	SPPL3	protein_coding	chr12	121202015	121202020	121202015	121202020	-	7	0	AGO1-4,AGO2	1	0	0	0	0	0	0	1
MIMAT0000692	hsa-miR-30e-5p	ENSG00000110931	CAMKK2	protein_coding	chr12	121676509	121676515	121676508	121676529	-	3	0	AGO2	1	0	0	0	1	0	1	3
MIMAT0000692	hsa-miR-30e-5p	ENSG00000184047	DIABLO	protein_coding	chr12	122692360	122692366	122692360	122692366	-	4	0	AGO1-4,AGO2	1	0	0	0	0	0	0	1
MIMAT0000692	hsa-miR-30e-5p	ENSG00000256861	AC048338.1	protein_coding	chr12	122692360	122692366	122692360	122692366	-	4	0	AGO1-4,AGO2	1	0	0	0	0	0	0	1
MIMAT0000692	hsa-miR-30e-5p	ENSG00000284934	DIABLO	protein_coding	chr12	122692360	122692366	122692360	122692366	-	4	0	AGO1-4,AGO2	1	0	0	0	0	0	0	1
MIMAT0000692	hsa-miR-30e-5p	ENSG00000139719	VPS33A	protein_coding	chr12	122714188	122714195	122714188	122714195	-	1	0	AGO2	0	0	0	0	0	0	1	1
MIMAT0000692	hsa-miR-30e-5p	ENSG00000139719	VPS33A	protein_coding	chr12	122716647	122716653	122716646	122716669	-	15	0	AGO1,AGO1-4,AGO2	1	0	0	0	1	0	0	2
MIMAT0000692	hsa-miR-30e-5p	ENSG00000090975	PITPNM2	protein_coding	chr12	123468439	123468445	123468438	123468466	-	6	0	AGO1-4,AGO2	1	0	0	1	1	0	1	4
MIMAT0000692	hsa-miR-30e-5p	ENSG00000111361	EIF2B1	protein_coding	chr12	124106363	124106370	124106363	124106370	-	4	0	AGO1-4,AGO2	0	0	0	0	0	0	1	1
MIMAT0000692	hsa-miR-30e-5p	ENSG00000196498	NCOR2	protein_coding	chr12	124809277	124809282	124809276	124809304	-	9	0	AGO1-4,AGO2	1	0	0	1	0	0	0	2
MIMAT0000692	hsa-miR-30e-5p	ENSG00000196498	NCOR2	protein_coding	chr12	124809718	124809725	124809717	124809745	-	4	0	AGO1-4,AGO2	1	0	0	1	1	0	0	3
MIMAT0000692	hsa-miR-30e-5p	ENSG00000060709	RIMBP2	protein_coding	chr12	130916461	130916466	130916460	130916481	-	1	0	AGO2	0	0	1	0	1	0	0	2
MIMAT0000692	hsa-miR-30e-5p	ENSG00000060709	RIMBP2	protein_coding	chr12	130916477	130916482	130916476	130916497	-	1	0	AGO2	0	0	1	0	1	0	0	2
MIMAT0000692	hsa-miR-30e-5p	ENSG00000111450	STX2	protein_coding	chr12	131274261	131274267	131274260	131274288	-	10	0	AGO1-4,AGO2	1	0	1	1	1	0	1	5
MIMAT0000692	hsa-miR-30e-5p	ENSG00000111450	STX2	protein_coding	chr12	131275301	131275306	131275300	131275328	-	3	0	AGO1-4,AGO2	1	0	1	1	0	0	0	3
MIMAT0000692	hsa-miR-30e-5p	ENSG00000196458	ZNF605	protein_coding	chr12	133501412	133501418	133501412	133501418	-	1	0	AGO1-4	1	0	0	0	0	0	0	1
MIMAT0000692	hsa-miR-30e-5p	ENSG00000118971	CCND2	protein_coding	chr12	4411166	4411171	4411166	4411171	+	16	0	AGO1,AGO1-4,AGO2	1	0	0	0	0	0	0	1
MIMAT0000692	hsa-miR-30e-5p	ENSG00000010278	CD9	protein_coding	chr12	6347022	6347027	6347022	6347027	+	4	0	AGO1,AGO1-4,AGO2	1	0	0	0	0	0	0	1
MIMAT0000692	hsa-miR-30e-5p	ENSG00000089818	NECAP1	protein_coding	chr12	8249167	8249173	8249146	8249174	+	5	0	AGO1-4	1	0	0	1	1	0	1	4
MIMAT0000692	hsa-miR-30e-5p	ENSG00000089818	NECAP1	protein_coding	chr12	8249305	8249311	8249284	8249312	+	4	0	AGO1-4	1	0	0	1	1	0	1	4
MIMAT0000692	hsa-miR-30e-5p	ENSG00000166527	CLEC4D	protein_coding	chr12	8674129	8674135	8674116	8674136	+	1	0	AGO1	1	0	0	0	1	0	0	2
MIMAT0000692	hsa-miR-30e-5p	ENSG00000139187	KLRG1	protein_coding	chr12	9163025	9163046	9163025	9163046	+	1	0	AGO2	0	0	0	0	1	0	0	1
MIMAT0000692	hsa-miR-30e-5p	ENSG00000178878	APOLD1	protein_coding	chr12	12982640	12982645	12982640	12982645	+	6	0	AGO1-4	1	0	0	0	0	0	0	1
MIMAT0000692	hsa-miR-30e-5p	ENSG00000213782	DDX47	protein_coding	chr12	12982640	12982645	12982640	12982645	+	6	0	AGO1-4	1	0	0	0	0	0	0	1
MIMAT0000692	hsa-miR-30e-5p	ENSG00000246705	H2AFJ	protein_coding	chr12	14930049	14930054	14930049	14930054	+	2	0	AGO1-4	1	0	0	0	0	0	0	1
MIMAT0000692	hsa-miR-30e-5p	ENSG00000111711	GOLT1B	protein_coding	chr12	21669602	21669609	21669589	21669610	+	3	0	AGO2	1	0	0	0	1	0	0	2
MIMAT0000692	hsa-miR-30e-5p	ENSG00000111726	CMAS	protein_coding	chr12	22208413	22208434	22208413	22208434	+	18	0	AGO1,AGO1-4,AGO2	0	0	0	0	1	0	0	1
MIMAT0000692	hsa-miR-30e-5p	ENSG00000139163	ETNK1	protein_coding	chr12	22842684	22842690	22842684	22842690	+	2	0	AGO1,AGO1-4	1	0	0	0	0	0	0	1
MIMAT0000692	hsa-miR-30e-5p	ENSG00000211455	STK38L	protein_coding	chr12	27477463	27477468	27477441	27477469	+	3	0	AGO1-4,AGO2	1	0	1	1	0	0	0	3
MIMAT0000692	hsa-miR-30e-5p	ENSG00000087470	DNM1L	protein_coding	chr12	32875371	32875393	32875371	32875393	+	3	0	AGO1-4	0	0	0	0	1	0	0	1
MIMAT0000692	hsa-miR-30e-5p	ENSG00000139133	ALG10	protein_coding	chr12	34180465	34180471	34180450	34180472	+	3	0	AGO1-4,AGO2	1	0	1	0	1	0	0	3
MIMAT0000692	hsa-miR-30e-5p	ENSG00000139133	ALG10	protein_coding	chr12	34180971	34180978	34180958	34180979	+	5	0	AGO1-4,AGO2	1	0	0	0	1	0	0	2
MIMAT0000692	hsa-miR-30e-5p	ENSG00000175548	ALG10B	protein_coding	chr12	38715631	38715637	38715610	38715638	+	2	0	AGO1-4	1	0	1	1	0	0	0	3
MIMAT0000692	hsa-miR-30e-5p	ENSG00000175548	ALG10B	protein_coding	chr12	38716125	38716131	38716104	38716132	+	6	0	AGO1,AGO1-4,AGO2	1	0	1	1	0	0	0	3
MIMAT0000692	hsa-miR-30e-5p	ENSG00000134283	PPHLN1	protein_coding	chr12	42840691	42840697	42840670	42840698	+	2	0	AGO1-4	1	0	1	1	1	0	0	4
MIMAT0000692	hsa-miR-30e-5p	ENSG00000134283	PPHLN1	protein_coding	chr12	42842217	42842223	42842196	42842224	+	6	1	AGO1-4,AGO2	1	0	1	1	1	0	0	4
MIMAT0000692	hsa-miR-30e-5p	ENSG00000161813	LARP4	protein_coding	chr12	50870846	50870851	50870824	50870852	+	10	0	AGO1-4,AGO2	1	0	0	1	1	1	1	5
MIMAT0000692	hsa-miR-30e-5p	ENSG00000161813	LARP4	protein_coding	chr12	50871035	50871040	50871013	50871041	+	5	1	AGO1,AGO1-4,AGO2	1	0	0	1	0	0	1	3
MIMAT0000692	hsa-miR-30e-5p	ENSG00000161813	LARP4	protein_coding	chr12	50871659	50871664	50871659	50871664	+	1	0	AGO2	1	0	0	0	0	0	0	1
MIMAT0000692	hsa-miR-30e-5p	ENSG00000066084	DIP2B	protein_coding	chr12	51072619	51072647	51072619	51072647	+	4	0	AGO1-4,AGO2	0	0	0	1	0	0	0	1
MIMAT0000692	hsa-miR-30e-5p	ENSG00000066084	DIP2B	protein_coding	chr12	51126290	51126318	51126290	51126318	+	4	1	AGO1-4	0	0	0	1	0	0	0	1
MIMAT0000692	hsa-miR-30e-5p	ENSG00000066084	DIP2B	protein_coding	chr12	51142247	51142253	51142226	51142254	+	3	0	AGO1-4,AGO2	1	0	0	1	1	0	1	4
MIMAT0000692	hsa-miR-30e-5p	ENSG00000123268	ATF1	protein_coding	chr12	51214390	51214396	51214369	51214397	+	12	0	AGO1-4,AGO2	1	0	0	1	1	0	1	4
MIMAT0000692	hsa-miR-30e-5p	ENSG00000196876	SCN8A	protein_coding	chr12	52201267	52201272	52201251	52201273	+	5	0	AGO1-4,AGO2	1	0	1	0	1	1	1	5
MIMAT0000692	hsa-miR-30e-5p	ENSG00000185591	SP1	protein_coding	chr12	53807655	53807660	53807655	53807660	+	13	0	AGO1,AGO1-4,AGO2	1	0	0	0	0	0	0	1
MIMAT0000692	hsa-miR-30e-5p	ENSG00000037965	HOXC8	protein_coding	chr12	54405240	54405245	54405240	54405245	+	2	0	AGO1-4	1	0	0	0	0	0	0	1
MIMAT0000692	hsa-miR-30e-5p	ENSG00000135486	HNRNPA1	protein_coding	chr12	54680773	54680801	54680773	54680801	+	13	0	AGO1,AGO1-4,AGO2	0	0	0	1	0	0	0	1
MIMAT0000692	hsa-miR-30e-5p	ENSG00000166987	MBD6	protein_coding	chr12	57923406	57923411	57923406	57923412	+	4	0	AGO1-4,AGO2	1	0	0	0	0	0	1	2
MIMAT0000692	hsa-miR-30e-5p	ENSG00000123427	EEF1AKMT3	protein_coding	chr12	58174795	58174801	58174779	58174802	+	2	0	AGO1-4,AGO2	1	0	0	0	1	0	0	2
MIMAT0000692	hsa-miR-30e-5p	ENSG00000123427	EEF1AKMT3	protein_coding	chr12	58176082	58176087	58176082	58176087	+	1	0	AGO1-4	1	0	0	0	0	0	0	1
MIMAT0000692	hsa-miR-30e-5p	ENSG00000135655	USP15	protein_coding	chr12	62785087	62785115	62785087	62785115	+	15	0	AGO1-4,AGO2	0	0	0	1	0	0	0	1
MIMAT0000692	hsa-miR-30e-5p	ENSG00000135655	USP15	protein_coding	chr12	62799838	62799843	62799816	62799844	+	7	0	AGO2	1	0	0	1	1	0	1	4
MIMAT0000692	hsa-miR-30e-5p	ENSG00000061987	MON2	protein_coding	chr12	62954828	62954856	62954828	62954856	+	11	0	AGO1-4,AGO2	0	0	0	1	0	0	0	1
MIMAT0000692	hsa-miR-30e-5p	ENSG00000111530	CAND1	protein_coding	chr12	67707214	67707219	67707192	67707220	+	5	0	AGO1-4,AGO2	1	0	1	1	1	0	1	5
MIMAT0000692	hsa-miR-30e-5p	ENSG00000111530	CAND1	protein_coding	chr12	67707938	67707943	67707916	67707944	+	19	0	AGO1,AGO1-4,AGO2	0	0	1	1	1	0	1	4
MIMAT0000692	hsa-miR-30e-5p	ENSG00000111530	CAND1	protein_coding	chr12	67708861	67708889	67708861	67708889	+	1	0	AGO1-4	0	0	0	1	0	0	0	1
MIMAT0000692	hsa-miR-30e-5p	ENSG00000127314	RAP1B	protein_coding	chr12	69053728	69053734	69053707	69053735	+	18	0	AGO1,AGO1-4,AGO2,AGO3	1	0	0	1	1	0	1	4
MIMAT0000692	hsa-miR-30e-5p	ENSG00000127314	RAP1B	protein_coding	chr12	69054363	69054368	69054341	69054369	+	5	0	AGO1,AGO1-4,AGO2	1	0	0	1	0	0	0	2
MIMAT0000692	hsa-miR-30e-5p	ENSG00000111605	CPSF6	protein_coding	chr12	69663750	69663756	69663729	69663757	+	16	0	AGO1,AGO1-4,AGO2,AGO3	1	0	1	1	1	0	1	5
MIMAT0000692	hsa-miR-30e-5p	ENSG00000111605	CPSF6	protein_coding	chr12	69667648	69667653	69667626	69667654	+	8	0	AGO1,AGO1-4,AGO2	0	0	1	1	0	0	0	2
MIMAT0000692	hsa-miR-30e-5p	ENSG00000111605	CPSF6	protein_coding	chr12	69667999	69668005	69667978	69668006	+	11	0	AGO1-4,AGO2	0	0	1	1	1	0	0	3
MIMAT0000692	hsa-miR-30e-5p	ENSG00000127337	YEATS4	protein_coding	chr12	69784563	69784568	69784548	69784569	+	7	0	AGO1-4,AGO2	1	0	0	0	1	0	0	2
MIMAT0000692	hsa-miR-30e-5p	ENSG00000166225	FRS2	protein_coding	chr12	69969793	69969799	69969772	69969800	+	15	0	AGO1,AGO1-4,AGO2	1	0	0	1	1	0	1	4
MIMAT0000692	hsa-miR-30e-5p	ENSG00000127328	RAB3IP	protein_coding	chr12	70214853	70214858	70214853	70214858	+	1	0	AGO2	1	0	0	0	0	0	0	1
MIMAT0000692	hsa-miR-30e-5p	ENSG00000111596	CNOT2	protein_coding	chr12	70739351	70739356	70739329	70739357	+	1	0	AGO1-4	0	0	1	1	0	0	0	2
MIMAT0000692	hsa-miR-30e-5p	ENSG00000111596	CNOT2	protein_coding	chr12	70747989	70748010	70747989	70748010	+	1	0	AGO2	0	0	0	0	1	0	0	1
MIMAT0000692	hsa-miR-30e-5p	ENSG00000080371	RAB21	protein_coding	chr12	72183147	72183175	72183147	72183175	+	9	0	AGO1,AGO2,AGO3	0	0	0	1	0	0	0	1
MIMAT0000692	hsa-miR-30e-5p	ENSG00000121749	TBC1D15	protein_coding	chr12	72317440	72317446	72317419	72317447	+	5	0	AGO1-4,AGO2	1	0	0	1	1	0	1	4
MIMAT0000692	hsa-miR-30e-5p	ENSG00000186908	ZDHHC17	protein_coding	chr12	77245988	77245994	77245967	77245995	+	17	0	AGO1,AGO1-4,AGO2,AGO3	1	0	0	1	1	0	1	4
MIMAT0000692	hsa-miR-30e-5p	ENSG00000067798	NAV3	protein_coding	chr12	78606485	78606490	78606463	78606491	+	1	0	AGO2	1	0	1	1	0	0	1	4
MIMAT0000692	hsa-miR-30e-5p	ENSG00000180318	ALX1	protein_coding	chr12	85695445	85695450	85695430	85695451	+	4	0	AGO1-4,AGO2	1	0	0	0	1	0	0	2
MIMAT0000692	hsa-miR-30e-5p	ENSG00000133641	C12orf29	protein_coding	chr12	88443754	88443760	88443740	88443761	+	2	0	AGO1-4,AGO2	1	0	0	0	1	0	0	2
MIMAT0000692	hsa-miR-30e-5p	ENSG00000198015	MRPL42	protein_coding	chr12	93896349	93896354	93896349	93896354	+	1	0	AGO1-4	1	0	0	0	0	0	0	1
MIMAT0000692	hsa-miR-30e-5p	ENSG00000136040	PLXNC1	protein_coding	chr12	94699306	94699313	94699285	94699313	+	2	0	AGO1-4,AGO2	0	0	0	1	0	0	1	2
MIMAT0000692	hsa-miR-30e-5p	ENSG00000028203	VEZT	protein_coding	chr12	95694536	95694541	95694536	95694541	+	13	0	AGO1,AGO1-4,AGO2	1	0	1	0	0	0	0	2
MIMAT0000692	hsa-miR-30e-5p	ENSG00000028203	VEZT	protein_coding	chr12	95695943	95695948	95695943	95695948	+	1	0	AGO2	1	0	1	0	0	0	0	2
MIMAT0000692	hsa-miR-30e-5p	ENSG00000111142	METAP2	protein_coding	chr12	95909529	95909535	95909508	95909536	+	7	0	AGO1,AGO1-4,AGO2	1	0	0	1	1	0	1	4
MIMAT0000692	hsa-miR-30e-5p	ENSG00000111145	ELK3	protein_coding	chr12	96661020	96661025	96660998	96661026	+	11	0	AGO1-4,AGO2	1	0	1	1	0	0	0	3
MIMAT0000692	hsa-miR-30e-5p	ENSG00000111145	ELK3	protein_coding	chr12	96661674	96661680	96661653	96661681	+	1	0	AGO1-4	0	0	1	1	0	0	1	3
MIMAT0000692	hsa-miR-30e-5p	ENSG00000111145	ELK3	protein_coding	chr12	96663135	96663141	96663114	96663142	+	4	0	AGO2	0	0	1	1	0	0	0	2
MIMAT0000692	hsa-miR-30e-5p	ENSG00000120868	APAF1	protein_coding	chr12	99128483	99128488	99128483	99128488	+	7	0	AGO1-4,AGO2	1	0	0	0	0	0	0	1
MIMAT0000692	hsa-miR-30e-5p	ENSG00000151572	ANO4	protein_coding	chr12	101522095	101522101	101522074	101522102	+	1	0	AGO2	1	0	1	1	1	0	1	5
MIMAT0000692	hsa-miR-30e-5p	ENSG00000139372	TDG	protein_coding	chr12	104382263	104382269	104382242	104382270	+	17	1	AGO1,AGO1-4,AGO2,AGO3	1	0	0	1	1	0	1	4
MIMAT0000692	hsa-miR-30e-5p	ENSG00000111727	HCFC2	protein_coding	chr12	104497561	104497582	104497554	104497582	+	10	0	AGO1-4,AGO2	0	0	0	1	1	0	0	2
MIMAT0000692	hsa-miR-30e-5p	ENSG00000111727	HCFC2	protein_coding	chr12	104498690	104498697	104498676	104498697	+	17	0	AGO1-4,AGO2	0	0	0	0	1	0	1	2
MIMAT0000692	hsa-miR-30e-5p	ENSG00000136051	WASHC4	protein_coding	chr12	105561333	105561338	105561333	105561339	+	13	0	AGO1,AGO1-4,AGO2	1	0	0	0	0	0	1	2
MIMAT0000692	hsa-miR-30e-5p	ENSG00000111785	RIC8B	protein_coding	chr12	107219536	107219556	107219536	107219556	+	3	0	AGO1-4	0	0	0	0	1	0	0	1
MIMAT0000692	hsa-miR-30e-5p	ENSG00000151135	TMEM263	protein_coding	chr12	107367187	107367193	107367174	107367194	+	2	0	AGO1-4,AGO2	1	0	0	0	1	0	0	2
MIMAT0000692	hsa-miR-30e-5p	ENSG00000151135	TMEM263	protein_coding	chr12	107367465	107367470	107367465	107367470	+	1	0	AGO2	1	0	0	0	0	0	0	1
MIMAT0000692	hsa-miR-30e-5p	ENSG00000151136	BTBD11	protein_coding	chr12	108044285	108044307	108044285	108044307	+	1	0	AGO1-4	0	0	0	0	1	0	0	1
MIMAT0000692	hsa-miR-30e-5p	ENSG00000151136	BTBD11	protein_coding	chr12	108044574	108044595	108044574	108044595	+	2	0	AGO1,AGO1-4	0	0	0	0	1	0	0	1
MIMAT0000692	hsa-miR-30e-5p	ENSG00000139437	TCHP	protein_coding	chr12	110354662	110354668	110354662	110354668	+	2	0	AGO1-4,AGO2	1	0	0	0	0	0	0	1
MIMAT0000692	hsa-miR-30e-5p	ENSG00000122970	IFT81	protein_coding	chr12	110656286	110656291	110656286	110656291	+	2	0	AGO2	1	0	0	0	0	0	0	1
MIMAT0000692	hsa-miR-30e-5p	ENSG00000174437	ATP2A2	protein_coding	chr12	110770427	110770455	110770427	110770455	+	2	0	AGO1-4,AGO2	0	0	0	1	0	0	0	1
MIMAT0000692	hsa-miR-30e-5p	ENSG00000174437	ATP2A2	protein_coding	chr12	110777130	110777158	110777130	110777158	+	3	0	AGO1,AGO1-4,AGO2	0	0	0	1	0	0	0	1
MIMAT0000692	hsa-miR-30e-5p	ENSG00000174437	ATP2A2	protein_coding	chr12	110784902	110784907	110784880	110784908	+	14	0	AGO1,AGO1-4,AGO2	1	0	0	1	0	1	1	4
MIMAT0000692	hsa-miR-30e-5p	ENSG00000111249	CUX2	protein_coding	chr12	111786257	111786262	111786257	111786262	+	1	0	AGO1-4	1	0	0	0	0	0	0	1
MIMAT0000692	hsa-miR-30e-5p	ENSG00000111252	SH2B3	protein_coding	chr12	111886316	111886322	111886295	111886323	+	18	0	AGO1,AGO1-4,AGO2,AGO3	1	0	0	1	1	0	1	4
MIMAT0000692	hsa-miR-30e-5p	ENSG00000111252	SH2B3	protein_coding	chr12	111887003	111887008	111886981	111887020	+	3	0	AGO1-4	1	0	0	2	0	0	1	4
MIMAT0000692	hsa-miR-30e-5p	ENSG00000111275	ALDH2	protein_coding	chr12	112247698	112247704	112247684	112247705	+	4	1	AGO1-4,AGO2	1	0	1	0	1	0	0	3
MIMAT0000692	hsa-miR-30e-5p	ENSG00000179295	PTPN11	protein_coding	chr12	112946149	112946154	112946149	112946154	+	1	0	AGO1-4	1	0	0	0	0	0	0	1
MIMAT0000692	hsa-miR-30e-5p	ENSG00000111331	OAS3	protein_coding	chr12	113408657	113408662	113408657	113408662	+	4	0	AGO1-4,AGO2	1	0	0	0	0	0	0	1
MIMAT0000692	hsa-miR-30e-5p	ENSG00000111335	OAS2	protein_coding	chr12	113426329	113426335	113426314	113426336	+	1	0	AGO2	1	0	0	0	1	0	0	2
MIMAT0000692	hsa-miR-30e-5p	ENSG00000111707	SUDS3	protein_coding	chr12	118853852	118853859	118853839	118853860	+	3	0	AGO1-4,AGO2	1	0	0	0	1	0	0	2
MIMAT0000692	hsa-miR-30e-5p	ENSG00000110917	MLEC	protein_coding	chr12	121137659	121137664	121137659	121137664	+	3	0	AGO1-4,AGO2	1	0	0	0	0	0	0	1
MIMAT0000692	hsa-miR-30e-5p	ENSG00000170633	RNF34	protein_coding	chr12	121862064	121862069	121862049	121862070	+	13	0	AGO1-4,AGO2	1	0	0	0	1	0	1	3
MIMAT0000692	hsa-miR-30e-5p	ENSG00000139718	SETD1B	protein_coding	chr12	122268934	122268940	122268922	122268941	+	13	0	AGO1,AGO1-4,AGO2	0	0	0	0	1	0	1	2
MIMAT0000692	hsa-miR-30e-5p	ENSG00000110987	BCL7A	protein_coding	chr12	122497186	122497191	122497186	122497191	+	8	0	AGO1,AGO1-4,AGO2	1	0	0	0	0	0	0	1
MIMAT0000692	hsa-miR-30e-5p	ENSG00000175727	MLXIP	protein_coding	chr12	122627968	122627974	122627947	122627975	+	5	0	AGO1-4,AGO2	1	0	0	1	0	0	1	3
MIMAT0000692	hsa-miR-30e-5p	ENSG00000175727	MLXIP	protein_coding	chr12	122628754	122628760	122628733	122628761	+	3	0	AGO1-4,AGO2	1	0	0	1	1	0	1	4
MIMAT0000692	hsa-miR-30e-5p	ENSG00000086598	TMED2	protein_coding	chr12	124081313	124081319	124081292	124081320	+	14	0	AGO1,AGO1-4,AGO2	1	0	0	1	1	0	1	4
MIMAT0000692	hsa-miR-30e-5p	ENSG00000185344	ATP6V0A2	protein_coding	chr12	124242752	124242757	124242752	124242757	+	2	0	AGO1-4,AGO2	1	0	0	0	0	0	0	1
MIMAT0000692	hsa-miR-30e-5p	ENSG00000185344	ATP6V0A2	protein_coding	chr12	124244698	124244722	124244698	124244722	+	4	3	AGO2	0	0	0	0	1	0	0	1
MIMAT0000692	hsa-miR-30e-5p	ENSG00000179195	ZNF664	protein_coding	chr12	124498612	124498617	124498612	124498617	+	4	0	AGO1-4,AGO2	1	0	0	0	0	0	0	1
MIMAT0000692	hsa-miR-30e-5p	ENSG00000111432	FZD10	protein_coding	chr12	130649360	130649366	130649346	130649367	+	2	0	AGO2	1	0	0	0	1	0	0	2
MIMAT0000692	hsa-miR-30e-5p	ENSG00000090612	ZNF268	protein_coding	chr12	133783514	133783519	133783514	133783519	+	1	0	AGO1-4	0	0	1	0	0	0	0	1
MIMAT0000692	hsa-miR-30e-5p	ENSG00000150457	LATS2	protein_coding	chr13	21547397	21547402	21547396	21547424	-	13	0	AGO1-4,AGO2	1	0	0	1	0	0	1	3
MIMAT0000692	hsa-miR-30e-5p	ENSG00000180776	ZDHHC20	protein_coding	chr13	21946899	21946905	21946898	21946926	-	6	0	AGO1-4	0	0	1	1	0	0	0	2
MIMAT0000692	hsa-miR-30e-5p	ENSG00000180776	ZDHHC20	protein_coding	chr13	21947481	21947487	21947480	21947508	-	14	0	AGO1-4,AGO2	0	0	1	1	0	0	1	3
MIMAT0000692	hsa-miR-30e-5p	ENSG00000180776	ZDHHC20	protein_coding	chr13	21947521	21947527	21947520	21947548	-	9	0	AGO1,AGO1-4,AGO2	0	0	1	1	0	0	1	3
MIMAT0000692	hsa-miR-30e-5p	ENSG00000180776	ZDHHC20	protein_coding	chr13	21947648	21947653	21947647	21947675	-	7	0	AGO1-4,AGO2	0	0	1	1	0	0	1	3
MIMAT0000692	hsa-miR-30e-5p	ENSG00000180776	ZDHHC20	protein_coding	chr13	21947743	21947748	21947743	21947748	-	2	0	AGO1-4	0	0	1	0	0	0	0	1
MIMAT0000692	hsa-miR-30e-5p	ENSG00000151835	SACS	protein_coding	chr13	23903626	23903632	23903625	23903646	-	19	0	AGO1,AGO1-4,AGO2	1	0	0	0	1	0	1	3
MIMAT0000692	hsa-miR-30e-5p	ENSG00000102755	FLT1	protein_coding	chr13	28877212	28877217	28877211	28877239	-	1	0	AGO2	1	0	0	1	0	0	0	2
MIMAT0000692	hsa-miR-30e-5p	ENSG00000102781	KATNAL1	protein_coding	chr13	30779156	30779163	30779156	30779163	-	2	0	AGO2	1	0	0	0	0	0	0	1
MIMAT0000692	hsa-miR-30e-5p	ENSG00000120669	SOHLH2	protein_coding	chr13	36742619	36742624	36742619	36742624	-	1	0	AGO2	1	0	0	0	0	0	0	1
MIMAT0000692	hsa-miR-30e-5p	ENSG00000133104	SPART	protein_coding	chr13	36876070	36876092	36876070	36876092	-	2	0	AGO2	0	0	0	0	1	0	0	1
MIMAT0000692	hsa-miR-30e-5p	ENSG00000133104	SPART	protein_coding	chr13	36876595	36876601	36876594	36876615	-	1	0	AGO2	1	0	1	0	1	0	0	3
MIMAT0000692	hsa-miR-30e-5p	ENSG00000102710	SUPT20H	protein_coding	chr13	37596865	37596886	37596865	37596886	-	4	0	AGO1-4,AGO2	0	0	0	0	1	0	0	1
MIMAT0000692	hsa-miR-30e-5p	ENSG00000133110	POSTN	protein_coding	chr13	38136970	38136975	38136970	38136975	-	5	0	AGO1-4	1	0	0	0	0	0	0	1
MIMAT0000692	hsa-miR-30e-5p	ENSG00000133107	TRPC4	protein_coding	chr13	38211017	38211022	38211017	38211022	-	1	0	AGO1-4	1	0	0	0	0	0	0	1
MIMAT0000692	hsa-miR-30e-5p	ENSG00000120685	PROSER1	protein_coding	chr13	39584699	39584705	39584698	39584726	-	14	0	AGO1,AGO1-4,AGO2,AGO3	1	0	0	1	1	0	1	4
MIMAT0000692	hsa-miR-30e-5p	ENSG00000120690	ELF1	protein_coding	chr13	41506675	41506681	41506674	41506694	-	6	0	AGO1-4,AGO2	1	0	0	0	1	0	0	2
MIMAT0000692	hsa-miR-30e-5p	ENSG00000165572	KBTBD6	protein_coding	chr13	41704318	41704324	41704317	41704338	-	12	0	AGO1,AGO1-4,AGO2,AGO3	1	0	0	0	1	0	0	2
MIMAT0000692	hsa-miR-30e-5p	ENSG00000120696	KBTBD7	protein_coding	chr13	41764100	41764128	41764100	41764128	-	3	0	AGO1-4,AGO2,AGO3	0	0	0	1	0	0	0	1
MIMAT0000692	hsa-miR-30e-5p	ENSG00000102763	VWA8	protein_coding	chr13	42141601	42141606	42141601	42141606	-	1	0	AGO2	1	0	0	0	0	0	0	1
MIMAT0000692	hsa-miR-30e-5p	ENSG00000174032	SLC25A30	protein_coding	chr13	45969220	45969241	45969220	45969241	-	1	0	AGO1-4	0	0	0	0	1	0	0	1
MIMAT0000692	hsa-miR-30e-5p	ENSG00000136167	LCP1	protein_coding	chr13	46700692	46700699	46700691	46700719	-	13	0	AGO1,AGO1-4,AGO2	1	0	0	1	1	0	0	3
MIMAT0000692	hsa-miR-30e-5p	ENSG00000102445	RUBCNL	protein_coding	chr13	46917312	46917318	46917311	46917339	-	5	0	AGO1-4,AGO2	1	0	1	1	1	0	1	5
MIMAT0000692	hsa-miR-30e-5p	ENSG00000136144	RCBTB1	protein_coding	chr13	50106539	50106545	50106538	50106566	-	1	0	AGO2	1	0	0	1	1	0	1	4
MIMAT0000692	hsa-miR-30e-5p	ENSG00000136144	RCBTB1	protein_coding	chr13	50129718	50129746	50129718	50129746	-	2	0	AGO2	0	0	0	1	0	0	0	1
MIMAT0000692	hsa-miR-30e-5p	ENSG00000102753	KPNA3	protein_coding	chr13	50274504	50274510	50274503	50274531	-	4	0	AGO1-4,AGO2	1	0	1	1	1	0	1	5
MIMAT0000692	hsa-miR-30e-5p	ENSG00000102753	KPNA3	protein_coding	chr13	50274889	50274895	50274888	50274916	-	2	0	AGO1,AGO2	1	0	1	1	1	1	1	6
MIMAT0000692	hsa-miR-30e-5p	ENSG00000102786	INTS6	protein_coding	chr13	51938307	51938313	51938306	51938328	-	4	0	AGO1-4,AGO2	1	0	0	0	1	0	0	2
MIMAT0000692	hsa-miR-30e-5p	ENSG00000123191	ATP7B	protein_coding	chr13	52507715	52507721	52507715	52507721	-	1	0	AGO1-4	1	0	0	0	0	0	0	1
MIMAT0000692	hsa-miR-30e-5p	ENSG00000123191	ATP7B	protein_coding	chr13	52508431	52508436	52508431	52508436	-	5	0	AGO1-4	1	0	0	0	0	0	0	1
MIMAT0000692	hsa-miR-30e-5p	ENSG00000136100	VPS36	protein_coding	chr13	52988157	52988163	52988156	52988177	-	4	0	AGO1,AGO2	1	0	0	0	1	0	0	2
MIMAT0000692	hsa-miR-30e-5p	ENSG00000204899	MZT1	protein_coding	chr13	73282654	73282660	73282653	73282681	-	15	1	AGO1-4,AGO2	1	0	1	1	1	0	1	5
MIMAT0000692	hsa-miR-30e-5p	ENSG00000204899	MZT1	protein_coding	chr13	73284265	73284271	73284264	73284292	-	20	0	AGO1,AGO1-4,AGO2,AGO3	1	0	1	1	1	0	1	5
MIMAT0000692	hsa-miR-30e-5p	ENSG00000118922	KLF12	protein_coding	chr13	74260935	74260940	74260934	74260962	-	1	0	AGO2	1	0	0	1	0	0	0	2
MIMAT0000692	hsa-miR-30e-5p	ENSG00000118922	KLF12	protein_coding	chr13	74266075	74266081	74266074	74266102	-	2	0	AGO2	1	0	0	1	0	0	1	3
MIMAT0000692	hsa-miR-30e-5p	ENSG00000178695	KCTD12	protein_coding	chr13	77458114	77458119	77458114	77458119	-	4	0	AGO1,AGO2	1	0	0	0	0	0	0	1
MIMAT0000692	hsa-miR-30e-5p	ENSG00000005812	FBXL3	protein_coding	chr13	77581007	77581012	77581007	77581012	-	1	0	AGO2	1	0	0	0	0	0	0	1
MIMAT0000692	hsa-miR-30e-5p	ENSG00000136160	EDNRB	protein_coding	chr13	78472157	78472163	78472157	78472163	-	1	0	AGO2	1	0	0	0	0	1	1	3
MIMAT0000692	hsa-miR-30e-5p	ENSG00000139746	RBM26	protein_coding	chr13	79887089	79887095	79887088	79887116	-	4	0	AGO1-4,AGO2	0	0	1	1	0	0	0	2
MIMAT0000692	hsa-miR-30e-5p	ENSG00000139746	RBM26	protein_coding	chr13	79887653	79887658	79887653	79887658	-	1	0	AGO2	0	0	1	0	0	0	0	1
MIMAT0000692	hsa-miR-30e-5p	ENSG00000139746	RBM26	protein_coding	chr13	79888992	79888998	79888991	79889019	-	7	0	AGO1-4,AGO2	0	0	1	1	0	0	0	2
MIMAT0000692	hsa-miR-30e-5p	ENSG00000088451	TGDS	protein_coding	chr13	95226427	95226433	95226426	95226447	-	4	0	AGO1,AGO2	1	0	1	0	1	0	0	3
MIMAT0000692	hsa-miR-30e-5p	ENSG00000125285	SOX21	protein_coding	chr13	95362609	95362614	95362609	95362614	-	2	0	AGO2	1	0	0	0	0	0	0	1
MIMAT0000692	hsa-miR-30e-5p	ENSG00000125257	ABCC4	protein_coding	chr13	95672628	95672633	95672628	95672633	-	1	0	AGO1-4	1	0	1	0	0	0	0	2
MIMAT0000692	hsa-miR-30e-5p	ENSG00000185950	IRS2	protein_coding	chr13	110406577	110406582	110406576	110406604	-	7	0	AGO1,AGO1-4,AGO2	1	0	0	1	1	0	1	4
MIMAT0000692	hsa-miR-30e-5p	ENSG00000185950	IRS2	protein_coding	chr13	110408034	110408041	110408033	110408061	-	17	0	AGO1-4,AGO2	1	0	0	1	0	0	0	2
MIMAT0000692	hsa-miR-30e-5p	ENSG00000088448	ANKRD10	protein_coding	chr13	111545117	111545137	111545117	111545137	-	2	0	AGO2	0	0	0	0	1	0	0	1
MIMAT0000692	hsa-miR-30e-5p	ENSG00000126216	TUBGCP3	protein_coding	chr13	113139710	113139715	113139709	113139730	-	6	0	AGO1,AGO2	1	0	0	0	1	0	1	3
MIMAT0000692	hsa-miR-30e-5p	ENSG00000153531	ADPRHL1	protein_coding	chr13	114076811	114076817	114076810	114076831	-	2	0	AGO2	1	0	0	0	1	0	0	2
MIMAT0000692	hsa-miR-30e-5p	ENSG00000121741	ZMYM2	protein_coding	chr13	20660237	20660242	20660215	20660243	+	12	0	AGO1-4,AGO2	1	0	0	1	1	0	0	3
MIMAT0000692	hsa-miR-30e-5p	ENSG00000121741	ZMYM2	protein_coding	chr13	20661149	20661177	20661149	20661177	+	7	0	AGO1-4,AGO2	0	0	0	1	0	0	0	1
MIMAT0000692	hsa-miR-30e-5p	ENSG00000150459	SAP18	protein_coding	chr13	21722787	21722792	21722787	21722792	+	1	0	AGO1-4	1	0	0	0	0	0	0	1
MIMAT0000692	hsa-miR-30e-5p	ENSG00000127863	TNFRSF19	protein_coding	chr13	24248112	24248117	24248112	24248117	+	1	0	AGO2	1	0	0	0	0	0	0	1
MIMAT0000692	hsa-miR-30e-5p	ENSG00000139496	NUP58	protein_coding	chr13	25907070	25907075	25907048	25907076	+	10	0	AGO1,AGO1-4,AGO2	0	0	1	1	0	0	0	2
MIMAT0000692	hsa-miR-30e-5p	ENSG00000139496	NUP58	protein_coding	chr13	25908492	25908498	25908471	25908499	+	21	0	AGO1,AGO1-4,AGO2	0	0	1	1	0	0	1	3
MIMAT0000692	hsa-miR-30e-5p	ENSG00000139496	NUP58	protein_coding	chr13	25914588	25914593	25914573	25914594	+	9	0	AGO1,AGO1-4,AGO2,AGO3	1	0	0	0	1	0	0	2
MIMAT0000692	hsa-miR-30e-5p	ENSG00000132964	CDK8	protein_coding	chr13	26978463	26978468	26978448	26978469	+	4	0	AGO2	1	0	0	0	1	0	0	2
MIMAT0000692	hsa-miR-30e-5p	ENSG00000132970	WASF3	protein_coding	chr13	27260277	27260282	27260277	27260282	+	1	0	AGO1-4	1	0	0	0	0	0	0	1
MIMAT0000692	hsa-miR-30e-5p	ENSG00000186184	POLR1D	protein_coding	chr13	28240896	28240902	28240875	28240903	+	1	0	AGO2	1	0	0	1	1	0	1	4
MIMAT0000692	hsa-miR-30e-5p	ENSG00000152520	PAN3	protein_coding	chr13	28868796	28868801	28868796	28868801	+	4	0	AGO1-4,AGO2	1	0	0	0	0	0	0	1
MIMAT0000692	hsa-miR-30e-5p	ENSG00000132963	POMP	protein_coding	chr13	29252390	29252395	29252390	29252395	+	3	0	AGO1,AGO2	1	0	0	0	0	0	0	1
MIMAT0000692	hsa-miR-30e-5p	ENSG00000083642	PDS5B	protein_coding	chr13	33349726	33349732	33349705	33349733	+	10	0	AGO1-4,AGO2	1	0	0	1	1	0	1	4
MIMAT0000692	hsa-miR-30e-5p	ENSG00000133119	RFC3	protein_coding	chr13	34411179	34411184	34411179	34411184	+	1	0	AGO2	1	0	0	0	0	0	0	1
MIMAT0000692	hsa-miR-30e-5p	ENSG00000133101	CCNA1	protein_coding	chr13	37016894	37016900	37016873	37016901	+	1	0	AGO2	1	0	1	1	1	0	0	4
MIMAT0000692	hsa-miR-30e-5p	ENSG00000120686	UFM1	protein_coding	chr13	38937078	38937083	38937078	38937083	+	3	0	AGO1-4,AGO2	1	0	0	0	0	0	0	1
MIMAT0000692	hsa-miR-30e-5p	ENSG00000102760	RGCC	protein_coding	chr13	42044819	42044825	42044798	42044826	+	1	0	AGO1-4	1	0	0	1	1	0	0	3
MIMAT0000692	hsa-miR-30e-5p	ENSG00000102780	DGKH	protein_coding	chr13	42816658	42816665	42816654	42816676	+	5	0	AGO1-4,AGO2	0	0	0	0	1	0	1	2
MIMAT0000692	hsa-miR-30e-5p	ENSG00000102780	DGKH	protein_coding	chr13	42816669	42816676	42816669	42816676	+	5	0	AGO1-4,AGO2	0	0	0	0	0	0	1	1
MIMAT0000692	hsa-miR-30e-5p	ENSG00000023516	AKAP11	protein_coding	chr13	42896462	42896467	42896446	42896468	+	5	0	AGO1-4,AGO2	1	0	0	0	1	0	0	2
MIMAT0000692	hsa-miR-30e-5p	ENSG00000102531	FNDC3A	protein_coding	chr13	49765406	49765434	49765406	49765434	+	4	0	AGO1-4,AGO2	0	0	0	1	0	0	0	1
MIMAT0000692	hsa-miR-30e-5p	ENSG00000102531	FNDC3A	protein_coding	chr13	49777327	49777350	49777322	49777350	+	4	0	AGO1-4,AGO2	0	0	0	1	1	0	0	2
MIMAT0000692	hsa-miR-30e-5p	ENSG00000102531	FNDC3A	protein_coding	chr13	49782181	49782181	49782154	49782209	+	4	0	AGO2	1	0	1	2	0	0	0	4
MIMAT0000692	hsa-miR-30e-5p	ENSG00000102531	FNDC3A	protein_coding	chr13	49782202	49782208	49782188	49782209	+	1	0	AGO2	1	0	1	0	1	0	1	4
MIMAT0000692	hsa-miR-30e-5p	ENSG00000102531	FNDC3A	protein_coding	chr13	49783193	49783199	49783172	49783200	+	7	0	AGO1-4,AGO2	1	0	1	1	1	0	1	5
MIMAT0000692	hsa-miR-30e-5p	ENSG00000139668	WDFY2	protein_coding	chr13	52334297	52334303	52334283	52334304	+	18	0	AGO1-4,AGO2	1	0	0	0	1	0	0	2
MIMAT0000692	hsa-miR-30e-5p	ENSG00000136108	CKAP2	protein_coding	chr13	53049527	53049532	53049527	53049532	+	3	0	AGO1,AGO1-4	1	0	1	0	0	0	0	2
MIMAT0000692	hsa-miR-30e-5p	ENSG00000136108	CKAP2	protein_coding	chr13	53049941	53049946	53049941	53049946	+	9	0	AGO1,AGO1-4,AGO2	1	0	1	0	0	0	0	2
MIMAT0000692	hsa-miR-30e-5p	ENSG00000118946	PCDH17	protein_coding	chr13	58300413	58300433	58300405	58300433	+	2	0	AGO2	0	0	0	1	1	0	0	2
MIMAT0000692	hsa-miR-30e-5p	ENSG00000136153	LMO7	protein_coding	chr13	76433020	76433026	76433005	76433027	+	1	0	AGO2	1	0	0	0	1	0	0	2
MIMAT0000692	hsa-miR-30e-5p	ENSG00000139737	SLAIN1	protein_coding	chr13	78337802	78337807	78337780	78337808	+	7	0	AGO2	1	0	0	1	1	1	0	4
MIMAT0000692	hsa-miR-30e-5p	ENSG00000152749	GPR180	protein_coding	chr13	95281454	95281460	95281440	95281461	+	4	0	AGO1-4,AGO2	1	0	0	0	1	0	1	3
MIMAT0000692	hsa-miR-30e-5p	ENSG00000102580	DNAJC3	protein_coding	chr13	96446864	96446885	96446864	96446885	+	4	0	AGO1,AGO1-4,AGO2	0	0	0	0	1	0	0	1
MIMAT0000692	hsa-miR-30e-5p	ENSG00000139793	MBNL2	protein_coding	chr13	98043859	98043864	98043837	98043865	+	3	0	AGO1-4	1	0	0	1	1	0	0	3
MIMAT0000692	hsa-miR-30e-5p	ENSG00000139793	MBNL2	protein_coding	chr13	98043949	98043954	98043927	98043955	+	2	0	AGO2	1	0	1	1	0	0	0	3
MIMAT0000692	hsa-miR-30e-5p	ENSG00000139793	MBNL2	protein_coding	chr13	98044872	98044878	98044851	98044879	+	4	0	AGO2	1	0	1	1	1	0	1	5
MIMAT0000692	hsa-miR-30e-5p	ENSG00000043355	ZIC2	protein_coding	chr13	100638439	100638444	100638439	100638444	+	8	0	AGO1,AGO1-4,AGO2	1	0	1	0	0	0	0	2
MIMAT0000692	hsa-miR-30e-5p	ENSG00000043355	ZIC2	protein_coding	chr13	100638674	100638679	100638659	100638680	+	13	0	AGO1,AGO1-4,AGO2	1	0	1	0	1	0	1	4
MIMAT0000692	hsa-miR-30e-5p	ENSG00000175198	PCCA	protein_coding	chr13	101182527	101182532	101182527	101182532	+	1	0	AGO2	1	0	0	0	0	0	0	1
MIMAT0000692	hsa-miR-30e-5p	ENSG00000139826	ABHD13	protein_coding	chr13	108884452	108884457	108884430	108884458	+	3	0	AGO1-4,AGO2	1	0	1	1	0	0	0	3
MIMAT0000692	hsa-miR-30e-5p	ENSG00000139826	ABHD13	protein_coding	chr13	108884989	108885017	108884989	108885017	+	1	0	AGO2	0	0	0	1	0	0	0	1
MIMAT0000692	hsa-miR-30e-5p	ENSG00000102606	ARHGEF7	protein_coding	chr13	111956984	111956990	111956984	111956990	+	1	0	AGO2	1	0	0	0	0	0	0	1
MIMAT0000692	hsa-miR-30e-5p	ENSG00000126217	MCF2L	protein_coding	chr13	113751671	113751677	113751650	113751678	+	5	0	AGO1-4,AGO2	0	0	1	1	1	0	1	4
MIMAT0000692	hsa-miR-30e-5p	ENSG00000126217	MCF2L	protein_coding	chr13	113751711	113751739	113751711	113751739	+	1	0	AGO2	0	0	0	1	0	0	0	1
MIMAT0000692	hsa-miR-30e-5p	ENSG00000198176	TFDP1	protein_coding	chr13	114295383	114295389	114295362	114295390	+	15	0	AGO1,AGO1-4,AGO2,AGO3	1	0	0	1	1	0	1	4
MIMAT0000692	hsa-miR-30e-5p	ENSG00000092199	HNRNPC	protein_coding	chr14	21678668	21678674	21678667	21678689	-	7	0	AGO1,AGO2	1	0	0	0	1	0	1	3
MIMAT0000692	hsa-miR-30e-5p	ENSG00000129472	RAB2B	protein_coding	chr14	21927515	21927521	21927514	21927533	-	2	0	AGO1-4,AGO2	1	0	0	0	1	0	0	2
MIMAT0000692	hsa-miR-30e-5p	ENSG00000157379	DHRS1	protein_coding	chr14	24759972	24759978	24759971	24759992	-	2	0	AGO1-4,AGO2	1	0	0	0	1	0	0	2
MIMAT0000692	hsa-miR-30e-5p	ENSG00000196792	STRN3	protein_coding	chr14	31363482	31363487	31363481	31363502	-	3	0	AGO1-4,AGO2	1	0	0	0	1	0	0	2
MIMAT0000692	hsa-miR-30e-5p	ENSG00000129480	DTD2	protein_coding	chr14	31916561	31916567	31916560	31916581	-	1	0	AGO1-4	1	0	0	0	1	0	0	2
MIMAT0000692	hsa-miR-30e-5p	ENSG00000129521	EGLN3	protein_coding	chr14	34394836	34394841	34394836	34394841	-	4	0	AGO1,AGO2	1	0	1	0	0	0	0	2
MIMAT0000692	hsa-miR-30e-5p	ENSG00000129515	SNX6	protein_coding	chr14	35031034	35031040	35031033	35031061	-	1	0	AGO1-4	1	0	0	1	1	0	1	4
MIMAT0000692	hsa-miR-30e-5p	ENSG00000165410	CFL2	protein_coding	chr14	35181369	35181375	35181368	35181396	-	34	0	AGO1,AGO1-4,AGO2	1	0	1	1	1	1	1	6
MIMAT0000692	hsa-miR-30e-5p	ENSG00000198604	BAZ1A	protein_coding	chr14	35222479	35222484	35222478	35222506	-	9	0	AGO1-4,AGO2	1	0	0	1	1	0	1	4
MIMAT0000692	hsa-miR-30e-5p	ENSG00000129514	FOXA1	protein_coding	chr14	38059979	38059984	38059978	38060006	-	2	0	AGO1-4,AGO2	1	0	0	1	0	0	0	2
MIMAT0000692	hsa-miR-30e-5p	ENSG00000129514	FOXA1	protein_coding	chr14	38060133	38060138	38060132	38060160	-	24	0	AGO1,AGO1-4,AGO2,AGO3	1	0	0	1	0	0	1	3
MIMAT0000692	hsa-miR-30e-5p	ENSG00000100934	SEC23A	protein_coding	chr14	39501385	39501391	39501384	39501412	-	24	0	AGO1-4,AGO2	1	0	1	1	1	0	1	5
MIMAT0000692	hsa-miR-30e-5p	ENSG00000100934	SEC23A	protein_coding	chr14	39501404	39501409	39501403	39501431	-	23	0	AGO1,AGO1-4,AGO2	1	0	1	1	1	0	0	4
MIMAT0000692	hsa-miR-30e-5p	ENSG00000100934	SEC23A	protein_coding	chr14	39501559	39501564	39501558	39501586	-	18	0	AGO1,AGO1-4,AGO2	1	0	1	1	1	0	0	4
MIMAT0000692	hsa-miR-30e-5p	ENSG00000100934	SEC23A	protein_coding	chr14	39502492	39502520	39502492	39502520	-	12	0	AGO1-4,AGO2	0	0	0	1	0	0	0	1
MIMAT0000692	hsa-miR-30e-5p	ENSG00000182400	TRAPPC6B	protein_coding	chr14	39619088	39619095	39619087	39619115	-	5	0	AGO1-4,AGO2	1	0	0	1	1	0	0	3
MIMAT0000692	hsa-miR-30e-5p	ENSG00000179454	KLHL28	protein_coding	chr14	45393673	45393679	45393672	45393693	-	18	0	AGO1,AGO1-4,AGO2,AGO3	1	0	0	0	1	0	1	3
MIMAT0000692	hsa-miR-30e-5p	ENSG00000179454	KLHL28	protein_coding	chr14	45394126	45394131	45394125	45394131	-	2	0	AGO2	1	0	0	0	0	0	1	2
MIMAT0000692	hsa-miR-30e-5p	ENSG00000179454	KLHL28	protein_coding	chr14	45395363	45395370	45395362	45395382	-	3	0	AGO1-4,AGO2	1	0	0	0	1	0	0	2
MIMAT0000692	hsa-miR-30e-5p	ENSG00000179454	KLHL28	protein_coding	chr14	45396917	45396923	45396916	45396937	-	10	0	AGO1-4,AGO2	1	0	0	0	1	0	1	3
MIMAT0000692	hsa-miR-30e-5p	ENSG00000100442	FKBP3	protein_coding	chr14	45585258	45585264	45585257	45585278	-	11	0	AGO1-4,AGO2	1	0	1	0	1	0	1	4
MIMAT0000692	hsa-miR-30e-5p	ENSG00000129534	MIS18BP1	protein_coding	chr14	45673030	45673036	45673029	45673050	-	2	0	AGO1-4,AGO2	1	0	0	0	1	0	1	3
MIMAT0000692	hsa-miR-30e-5p	ENSG00000100483	VCPKMT	protein_coding	chr14	50575596	50575602	50575595	50575623	-	23	0	AGO1-4,AGO2	1	0	0	1	1	0	0	3
MIMAT0000692	hsa-miR-30e-5p	ENSG00000100485	SOS2	protein_coding	chr14	50587072	50587100	50587072	50587100	-	1	0	AGO1-4	0	0	0	1	0	0	0	1
MIMAT0000692	hsa-miR-30e-5p	ENSG00000100485	SOS2	protein_coding	chr14	50605349	50605377	50605349	50605377	-	1	0	AGO1-4	0	0	0	1	0	0	0	1
MIMAT0000692	hsa-miR-30e-5p	ENSG00000151748	SAV1	protein_coding	chr14	51101515	51101520	51101515	51101520	-	1	0	AGO2	1	0	0	0	0	0	0	1
MIMAT0000692	hsa-miR-30e-5p	ENSG00000087303	NID2	protein_coding	chr14	52472171	52472176	52472171	52472176	-	1	0	AGO2	1	0	0	0	0	0	0	1
MIMAT0000692	hsa-miR-30e-5p	ENSG00000197930	ERO1A	protein_coding	chr14	53108693	53108698	53108693	53108698	-	9	0	AGO1,AGO1-4,AGO2	1	0	0	0	0	0	0	1
MIMAT0000692	hsa-miR-30e-5p	ENSG00000197045	GMFB	protein_coding	chr14	54942191	54942196	54942191	54942196	-	2	0	AGO1-4,AGO2	1	0	0	0	0	0	0	1
MIMAT0000692	hsa-miR-30e-5p	ENSG00000070367	EXOC5	protein_coding	chr14	57670417	57670422	57670417	57670422	-	3	0	AGO2	1	0	0	0	0	0	0	1
MIMAT0000692	hsa-miR-30e-5p	ENSG00000126778	SIX1	protein_coding	chr14	61111755	61111761	61111754	61111782	-	3	0	AGO2	0	0	1	1	1	0	1	4
MIMAT0000692	hsa-miR-30e-5p	ENSG00000126778	SIX1	protein_coding	chr14	61112434	61112439	61112433	61112461	-	3	0	AGO2	0	0	1	1	1	0	1	4
MIMAT0000692	hsa-miR-30e-5p	ENSG00000100625	SIX4	protein_coding	chr14	61177849	61177854	61177848	61177876	-	1	0	AGO2	1	0	0	1	0	0	0	2
MIMAT0000692	hsa-miR-30e-5p	ENSG00000100625	SIX4	protein_coding	chr14	61179722	61179728	61179721	61179749	-	18	0	AGO1,AGO2,AGO3	1	0	0	1	1	0	1	4
MIMAT0000692	hsa-miR-30e-5p	ENSG00000126814	TRMT5	protein_coding	chr14	61441179	61441185	61441178	61441206	-	1	0	AGO2	1	0	0	1	1	0	1	4
MIMAT0000692	hsa-miR-30e-5p	ENSG00000182107	TMEM30B	protein_coding	chr14	61745208	61745213	61745208	61745213	-	3	0	AGO1-4	1	0	1	0	0	0	0	2
MIMAT0000692	hsa-miR-30e-5p	ENSG00000154001	PPP2R5E	protein_coding	chr14	63842143	63842149	63842142	63842165	-	2	0	AGO1-4,AGO2	1	0	0	0	1	0	1	3
MIMAT0000692	hsa-miR-30e-5p	ENSG00000140006	WDR89	protein_coding	chr14	64065437	64065443	64065436	64065457	-	5	0	AGO1-4,AGO2,AGO3	1	0	1	0	1	0	0	3
MIMAT0000692	hsa-miR-30e-5p	ENSG00000139998	RAB15	protein_coding	chr14	65412557	65412562	65412556	65412584	-	9	1	AGO1-4,AGO2	1	0	1	1	1	1	1	6
MIMAT0000692	hsa-miR-30e-5p	ENSG00000139998	RAB15	protein_coding	chr14	65412726	65412732	65412725	65412753	-	1	1	AGO2	1	0	1	1	0	0	0	3
MIMAT0000692	hsa-miR-30e-5p	ENSG00000072121	ZFYVE26	protein_coding	chr14	68214847	68214853	68214846	68214868	-	12	0	AGO1-4,AGO2	1	0	0	0	1	1	1	4
MIMAT0000692	hsa-miR-30e-5p	ENSG00000185650	ZFP36L1	protein_coding	chr14	69255894	69255899	69255893	69255899	-	14	0	AGO1-4,AGO2	1	0	0	0	0	0	1	2
MIMAT0000692	hsa-miR-30e-5p	ENSG00000072110	ACTN1	protein_coding	chr14	69341414	69341419	69341413	69341441	-	8	0	AGO1-4,AGO2	1	0	0	1	1	0	1	4
MIMAT0000692	hsa-miR-30e-5p	ENSG00000139990	DCAF5	protein_coding	chr14	69520146	69520152	69520145	69520166	-	5	0	AGO1-4,AGO2	1	0	0	0	1	0	1	3
MIMAT0000692	hsa-miR-30e-5p	ENSG00000133997	MED6	protein_coding	chr14	71050351	71050356	71050350	71050378	-	5	0	AGO1-4,AGO2	0	0	1	1	0	0	0	2
MIMAT0000692	hsa-miR-30e-5p	ENSG00000133997	MED6	protein_coding	chr14	71050997	71051003	71050996	71051024	-	22	0	AGO1,AGO1-4,AGO2,AGO3	1	0	1	1	1	0	0	4
MIMAT0000692	hsa-miR-30e-5p	ENSG00000176903	PNMA1	protein_coding	chr14	74178836	74178842	74178835	74178863	-	10	0	AGO1-4,AGO2,AGO3	1	0	1	1	1	0	0	4
MIMAT0000692	hsa-miR-30e-5p	ENSG00000176903	PNMA1	protein_coding	chr14	74178917	74178923	74178916	74178944	-	4	0	AGO1-4,AGO2	1	0	1	1	1	0	0	4
MIMAT0000692	hsa-miR-30e-5p	ENSG00000156030	ELMSAN1	protein_coding	chr14	74182332	74182337	74182331	74182337	-	4	0	AGO1-4,AGO2	1	0	0	0	0	0	1	2
MIMAT0000692	hsa-miR-30e-5p	ENSG00000198208	RPS6KL1	protein_coding	chr14	75372375	75372380	75372375	75372380	-	1	0	AGO1-4	1	0	0	0	0	0	0	1
MIMAT0000692	hsa-miR-30e-5p	ENSG00000198208	RPS6KL1	protein_coding	chr14	75372828	75372834	75372828	75372834	-	2	0	AGO2	1	0	0	0	0	0	0	1
MIMAT0000692	hsa-miR-30e-5p	ENSG00000119684	MLH3	protein_coding	chr14	75481781	75481786	75481781	75481786	-	1	0	AGO2	1	0	0	0	0	0	0	1
MIMAT0000692	hsa-miR-30e-5p	ENSG00000170348	TMED10	protein_coding	chr14	75601096	75601103	75601095	75601123	-	25	1	AGO1,AGO1-4,AGO2	1	0	0	1	1	0	0	3
MIMAT0000692	hsa-miR-30e-5p	ENSG00000100596	SPTLC2	protein_coding	chr14	77973354	77973360	77973354	77973360	-	6	0	AGO1,AGO1-4,AGO2	1	0	0	0	0	0	1	2
MIMAT0000692	hsa-miR-30e-5p	ENSG00000211448	DIO2	protein_coding	chr14	80666120	80666127	80666120	80666127	-	1	0	AGO2	0	0	0	0	0	0	1	1
MIMAT0000692	hsa-miR-30e-5p	ENSG00000071537	SEL1L	protein_coding	chr14	81941168	81941173	81941168	81941173	-	4	0	AGO1-4,AGO2	1	0	0	0	0	0	0	1
MIMAT0000692	hsa-miR-30e-5p	ENSG00000070778	PTPN21	protein_coding	chr14	88934438	88934443	88934437	88934465	-	2	0	AGO1-4	1	0	0	1	0	0	1	3
MIMAT0000692	hsa-miR-30e-5p	ENSG00000053254	FOXN3	protein_coding	chr14	89622947	89622952	89622947	89622952	-	1	0	AGO1-4	1	0	0	0	0	0	0	1
MIMAT0000692	hsa-miR-30e-5p	ENSG00000165929	TC2N	protein_coding	chr14	92247721	92247726	92247721	92247726	-	1	0	AGO1-4	1	0	1	0	0	0	0	2
MIMAT0000692	hsa-miR-30e-5p	ENSG00000165929	TC2N	protein_coding	chr14	92248989	92248995	92248989	92248995	-	6	0	AGO1-4,AGO2	1	0	1	0	0	0	0	2
MIMAT0000692	hsa-miR-30e-5p	ENSG00000100605	ITPK1	protein_coding	chr14	93406190	93406197	93406190	93406211	-	10	0	AGO1-4,AGO2	0	0	0	0	1	0	1	2
MIMAT0000692	hsa-miR-30e-5p	ENSG00000100605	ITPK1	protein_coding	chr14	93406346	93406351	93406345	93406373	-	13	1	AGO1-4,AGO2	1	0	1	1	0	0	1	4
MIMAT0000692	hsa-miR-30e-5p	ENSG00000100605	ITPK1	protein_coding	chr14	93406591	93406596	93406590	93406618	-	2	0	AGO1-4	1	0	1	1	0	0	0	3
MIMAT0000692	hsa-miR-30e-5p	ENSG00000100605	ITPK1	protein_coding	chr14	93407650	93407655	93407649	93407677	-	9	0	AGO1-4,AGO2	1	0	1	1	0	0	1	4
MIMAT0000692	hsa-miR-30e-5p	ENSG00000011114	BTBD7	protein_coding	chr14	93704130	93704136	93704129	93704157	-	12	0	AGO1-4,AGO2	1	0	0	1	1	0	1	4
MIMAT0000692	hsa-miR-30e-5p	ENSG00000011114	BTBD7	protein_coding	chr14	93704808	93704813	93704808	93704813	-	7	0	AGO1-4,AGO2	1	0	0	0	0	0	0	1
MIMAT0000692	hsa-miR-30e-5p	ENSG00000011114	BTBD7	protein_coding	chr14	93705613	93705618	93705612	93705640	-	9	0	AGO1,AGO1-4,AGO2	1	0	0	1	0	0	0	2
MIMAT0000692	hsa-miR-30e-5p	ENSG00000011114	BTBD7	protein_coding	chr14	93712516	93712544	93712516	93712544	-	7	0	AGO1-4,AGO2	0	0	0	1	0	0	0	1
MIMAT0000692	hsa-miR-30e-5p	ENSG00000066739	ATG2B	protein_coding	chr14	96747990	96747996	96747989	96748017	-	6	1	AGO1-4,AGO2	1	0	1	1	1	0	0	4
MIMAT0000692	hsa-miR-30e-5p	ENSG00000066739	ATG2B	protein_coding	chr14	96748468	96748474	96748467	96748495	-	1	0	AGO2	1	0	1	1	0	0	0	3
MIMAT0000692	hsa-miR-30e-5p	ENSG00000066739	ATG2B	protein_coding	chr14	96750255	96750260	96750254	96750282	-	5	0	AGO1-4,AGO2	1	0	1	1	0	0	0	3
MIMAT0000692	hsa-miR-30e-5p	ENSG00000127152	BCL11B	protein_coding	chr14	99635939	99635945	99635938	99635966	-	3	0	AGO1-4,AGO2	1	0	1	1	1	0	1	5
MIMAT0000692	hsa-miR-30e-5p	ENSG00000127152	BCL11B	protein_coding	chr14	99638446	99638451	99638445	99638473	-	2	0	AGO1-4,AGO2	1	0	1	1	0	0	1	4
MIMAT0000692	hsa-miR-30e-5p	ENSG00000127152	BCL11B	protein_coding	chr14	99639974	99639980	99639973	99640001	-	1	0	AGO2	1	0	1	1	1	0	0	4
MIMAT0000692	hsa-miR-30e-5p	ENSG00000183576	SETD3	protein_coding	chr14	99864370	99864376	99864369	99864392	-	9	0	AGO1-4,AGO2	1	0	1	0	1	0	1	4
MIMAT0000692	hsa-miR-30e-5p	ENSG00000140105	WARS	protein_coding	chr14	100800567	100800572	100800567	100800572	-	3	0	AGO1-4	1	0	0	0	0	0	0	1
MIMAT0000692	hsa-miR-30e-5p	ENSG00000156411	ATP5MPL	protein_coding	chr14	104378887	104378892	104378887	104378892	-	16	0	AGO1,AGO1-4,AGO2,AGO3	1	0	0	0	0	0	0	1
MIMAT0000692	hsa-miR-30e-5p	ENSG00000142208	AKT1	protein_coding	chr14	105236085	105236090	105236085	105236090	-	1	0	AGO2	1	0	0	0	0	0	0	1
MIMAT0000692	hsa-miR-30e-5p	ENSG00000184916	JAG2	protein_coding	chr14	105608702	105608708	105608701	105608729	-	6	0	AGO1-4,AGO2	1	0	0	1	1	0	1	4
MIMAT0000692	hsa-miR-30e-5p	ENSG00000165801	ARHGEF40	protein_coding	chr14	21553047	21553068	21553040	21553068	+	1	0	AGO1-4	0	0	0	1	1	0	0	2
MIMAT0000692	hsa-miR-30e-5p	ENSG00000100441	KHNYN	protein_coding	chr14	24907426	24907432	24907405	24907433	+	25	1	AGO1,AGO1-4,AGO2	1	0	0	1	1	0	1	4
MIMAT0000692	hsa-miR-30e-5p	ENSG00000176165	FOXG1	protein_coding	chr14	29238460	29238466	29238439	29238467	+	2	0	AGO2	1	0	1	1	1	0	1	5
MIMAT0000692	hsa-miR-30e-5p	ENSG00000176165	FOXG1	protein_coding	chr14	29238829	29238835	29238808	29238836	+	5	0	AGO1,AGO2	1	0	1	1	1	0	1	5
MIMAT0000692	hsa-miR-30e-5p	ENSG00000151320	AKAP6	protein_coding	chr14	33015210	33015238	33015210	33015238	+	1	0	AGO2	0	0	0	1	0	0	0	1
MIMAT0000692	hsa-miR-30e-5p	ENSG00000151322	NPAS3	protein_coding	chr14	34272492	34272513	34272492	34272513	+	2	0	AGO1-4,AGO2	0	0	0	0	1	0	0	1
MIMAT0000692	hsa-miR-30e-5p	ENSG00000151327	FAM177A1	protein_coding	chr14	35551337	35551342	35551337	35551342	+	4	0	AGO1-4,AGO2	1	0	1	0	0	0	0	2
MIMAT0000692	hsa-miR-30e-5p	ENSG00000151327	FAM177A1	protein_coding	chr14	35552402	35552407	35552402	35552407	+	2	0	AGO2	1	0	1	0	0	0	0	2
MIMAT0000692	hsa-miR-30e-5p	ENSG00000198807	PAX9	protein_coding	chr14	37146879	37146884	37146879	37146885	+	4	0	AGO1-4,AGO2	1	0	0	0	0	0	1	2
MIMAT0000692	hsa-miR-30e-5p	ENSG00000100941	PNN	protein_coding	chr14	39651206	39651212	39651193	39651213	+	7	0	AGO1-4,AGO2	1	0	0	0	1	0	1	3
MIMAT0000692	hsa-miR-30e-5p	ENSG00000179476	C14orf28	protein_coding	chr14	45375555	45375561	45375534	45375562	+	1	0	AGO1-4	1	0	1	1	1	0	0	4
MIMAT0000692	hsa-miR-30e-5p	ENSG00000179476	C14orf28	protein_coding	chr14	45375884	45375890	45375863	45375891	+	4	0	AGO1-4,AGO2	1	0	1	1	1	0	1	5
MIMAT0000692	hsa-miR-30e-5p	ENSG00000198718	TOGARAM1	protein_coding	chr14	45542798	45542804	45542784	45542805	+	3	0	AGO1-4	1	0	1	0	1	0	1	4
MIMAT0000692	hsa-miR-30e-5p	ENSG00000185246	PRPF39	protein_coding	chr14	45579799	45579827	45579799	45579827	+	1	0	AGO1-4	0	0	0	1	0	0	0	1
MIMAT0000692	hsa-miR-30e-5p	ENSG00000168282	MGAT2	protein_coding	chr14	50090072	50090078	50090056	50090079	+	1	0	AGO2	1	0	0	0	1	0	0	2
MIMAT0000692	hsa-miR-30e-5p	ENSG00000165516	KLHDC2	protein_coding	chr14	50249831	50249836	50249816	50249837	+	5	0	AGO1-4,AGO2	1	0	0	0	1	0	0	2
MIMAT0000692	hsa-miR-30e-5p	ENSG00000165527	ARF6	protein_coding	chr14	50362021	50362026	50362021	50362026	+	1	0	AGO2	1	0	0	0	0	0	0	1
MIMAT0000692	hsa-miR-30e-5p	ENSG00000139921	TMX1	protein_coding	chr14	51722008	51722013	51722008	51722013	+	1	0	AGO1-4	1	0	0	0	0	0	0	1
MIMAT0000692	hsa-miR-30e-5p	ENSG00000139926	FRMD6	protein_coding	chr14	52195497	52195502	52195475	52195503	+	10	0	AGO1-4,AGO2	1	0	0	1	0	0	0	2
MIMAT0000692	hsa-miR-30e-5p	ENSG00000139926	FRMD6	protein_coding	chr14	52196261	52196267	52196240	52196268	+	5	0	AGO1-4,AGO2	1	0	0	1	1	0	1	4
MIMAT0000692	hsa-miR-30e-5p	ENSG00000100519	PSMC6	protein_coding	chr14	53194889	53194917	53194889	53194917	+	1	0	AGO2	0	0	0	1	0	0	0	1
MIMAT0000692	hsa-miR-30e-5p	ENSG00000198252	STYX	protein_coding	chr14	53241376	53241382	53241354	53241382	+	13	0	AGO1-4,AGO2	0	0	0	1	0	0	1	2
MIMAT0000692	hsa-miR-30e-5p	ENSG00000020577	SAMD4A	protein_coding	chr14	55256272	55256279	55256251	55256279	+	8	0	AGO1-4,AGO2	0	0	0	1	1	0	1	3
MIMAT0000692	hsa-miR-30e-5p	ENSG00000168175	MAPK1IP1L	protein_coding	chr14	55536661	55536666	55536661	55536666	+	1	0	AGO1-4	1	0	0	0	0	0	0	1
MIMAT0000692	hsa-miR-30e-5p	ENSG00000178974	FBXO34	protein_coding	chr14	55819795	55819801	55819774	55819802	+	13	0	AGO1,AGO1-4,AGO2	1	0	0	1	1	0	1	4
MIMAT0000692	hsa-miR-30e-5p	ENSG00000070269	TMEM260	protein_coding	chr14	57116067	57116072	57116052	57116073	+	2	0	AGO1-4,AGO2	1	0	0	0	1	0	0	2
MIMAT0000692	hsa-miR-30e-5p	ENSG00000053770	AP5M1	protein_coding	chr14	57762191	57762198	57762191	57762198	+	5	0	AGO1-4,AGO2	0	0	0	0	0	0	1	1
MIMAT0000692	hsa-miR-30e-5p	ENSG00000139977	NAA30	protein_coding	chr14	57876982	57876987	57876966	57876988	+	11	0	AGO1,AGO1-4,AGO2,AGO3	1	0	0	0	1	0	0	2
MIMAT0000692	hsa-miR-30e-5p	ENSG00000131966	ACTR10	protein_coding	chr14	58701389	58701395	58701375	58701396	+	18	0	AGO1,AGO1-4,AGO2	1	0	0	0	1	0	0	2
MIMAT0000692	hsa-miR-30e-5p	ENSG00000032219	ARID4A	protein_coding	chr14	58839369	58839375	58839348	58839376	+	10	0	AGO1-4,AGO2	1	0	0	1	1	0	1	4
MIMAT0000692	hsa-miR-30e-5p	ENSG00000165617	DACT1	protein_coding	chr14	59115024	59115030	59115003	59115031	+	1	0	AGO2	1	0	0	1	1	0	1	4
MIMAT0000692	hsa-miR-30e-5p	ENSG00000100614	PPM1A	protein_coding	chr14	60759222	60759227	60759222	60759227	+	1	0	AGO1-4	1	0	1	0	0	0	0	2
MIMAT0000692	hsa-miR-30e-5p	ENSG00000100614	PPM1A	protein_coding	chr14	60762414	60762419	60762414	60762419	+	1	0	AGO1-4	0	0	1	0	0	0	0	1
MIMAT0000692	hsa-miR-30e-5p	ENSG00000100614	PPM1A	protein_coding	chr14	60764582	60764587	60764582	60764587	+	1	0	AGO2	0	0	1	0	0	0	0	1
MIMAT0000692	hsa-miR-30e-5p	ENSG00000139974	SLC38A6	protein_coding	chr14	61519540	61519561	61519540	61519561	+	1	0	AGO1-4	0	0	0	0	1	0	0	1
MIMAT0000692	hsa-miR-30e-5p	ENSG00000139974	SLC38A6	protein_coding	chr14	61550326	61550345	61550326	61550345	+	1	0	AGO1-4	0	0	0	0	1	0	0	1
MIMAT0000692	hsa-miR-30e-5p	ENSG00000100714	MTHFD1	protein_coding	chr14	64926676	64926682	64926662	64926683	+	12	0	AGO1-4,AGO2	1	0	1	0	1	0	0	3
MIMAT0000692	hsa-miR-30e-5p	ENSG00000125954	CHURC1-FNTB	protein_coding	chr14	65398987	65398992	65398987	65398992	+	7	0	AGO1-4,AGO2	1	0	0	0	0	0	0	1
MIMAT0000692	hsa-miR-30e-5p	ENSG00000258289	CHURC1	protein_coding	chr14	65398987	65398992	65398987	65398992	+	7	0	AGO1-4,AGO2	1	0	0	0	0	0	0	1
MIMAT0000692	hsa-miR-30e-5p	ENSG00000258289	CHURC1	protein_coding	chr14	65410681	65410687	65410662	65410688	+	1	0	AGO1-4	0	0	1	0	1	0	0	2
MIMAT0000692	hsa-miR-30e-5p	ENSG00000072415	MPP5	protein_coding	chr14	67801552	67801557	67801552	67801557	+	11	0	AGO1-4,AGO2	1	0	0	0	0	0	0	1
MIMAT0000692	hsa-miR-30e-5p	ENSG00000134001	EIF2S1	protein_coding	chr14	67851706	67851712	67851692	67851713	+	2	0	AGO1-4	1	0	0	0	1	0	0	2
MIMAT0000692	hsa-miR-30e-5p	ENSG00000182185	RAD51B	protein_coding	chr14	69061988	69061993	69061988	69061993	+	2	0	AGO1-4	1	0	0	0	0	0	0	1
MIMAT0000692	hsa-miR-30e-5p	ENSG00000081177	EXD2	protein_coding	chr14	69709034	69709040	69709013	69709041	+	7	0	AGO1-4,AGO2	1	0	1	1	1	0	0	4
MIMAT0000692	hsa-miR-30e-5p	ENSG00000100647	SUSD6	protein_coding	chr14	70178058	70178064	70178058	70178064	+	4	0	AGO1-4,AGO2	1	0	0	0	0	0	1	2
MIMAT0000692	hsa-miR-30e-5p	ENSG00000205659	LIN52	protein_coding	chr14	74666088	74666109	74666088	74666109	+	2	0	AGO1-4,AGO2	0	0	0	0	1	0	0	1
MIMAT0000692	hsa-miR-30e-5p	ENSG00000165898	ISCA2	protein_coding	chr14	74961779	74961784	74961779	74961784	+	3	0	AGO1-4,AGO2	1	0	0	0	0	0	0	1
MIMAT0000692	hsa-miR-30e-5p	ENSG00000119596	YLPM1	protein_coding	chr14	75288499	75288520	75288499	75288520	+	1	0	AGO1-4	0	0	0	0	1	0	0	1
MIMAT0000692	hsa-miR-30e-5p	ENSG00000140044	JDP2	protein_coding	chr14	75936818	75936823	75936796	75936824	+	17	0	AGO1-4,AGO2	1	0	0	1	1	1	1	5
MIMAT0000692	hsa-miR-30e-5p	ENSG00000119686	FLVCR2	protein_coding	chr14	76114380	76114386	76114359	76114387	+	3	0	AGO1-4,AGO2	1	0	1	1	1	0	0	4
MIMAT0000692	hsa-miR-30e-5p	ENSG00000119686	FLVCR2	protein_coding	chr14	76114417	76114423	76114396	76114424	+	3	0	AGO1-4,AGO2	1	0	1	1	1	0	0	4
MIMAT0000692	hsa-miR-30e-5p	ENSG00000089916	GPATCH2L	protein_coding	chr14	76669628	76669633	76669606	76669634	+	3	0	AGO1-4	0	0	1	1	0	0	0	2
MIMAT0000692	hsa-miR-30e-5p	ENSG00000089916	GPATCH2L	protein_coding	chr14	76673751	76673779	76673751	76673779	+	1	0	AGO2	0	0	0	1	0	0	0	1
MIMAT0000692	hsa-miR-30e-5p	ENSG00000089916	GPATCH2L	protein_coding	chr14	76675832	76675838	76675811	76675839	+	1	0	AGO1-4	0	0	1	1	0	0	0	2
MIMAT0000692	hsa-miR-30e-5p	ENSG00000021645	NRXN3	protein_coding	chr14	80329882	80329888	80329861	80329889	+	4	0	AGO2	1	0	0	1	1	0	1	4
MIMAT0000692	hsa-miR-30e-5p	ENSG00000100722	ZC3H14	protein_coding	chr14	89079625	89079630	89079625	89079630	+	1	0	AGO2	1	0	0	0	0	0	0	1
MIMAT0000692	hsa-miR-30e-5p	ENSG00000165533	TTC8	protein_coding	chr14	89344033	89344039	89344012	89344040	+	7	0	AGO1-4,AGO2	1	0	1	1	1	0	0	4
MIMAT0000692	hsa-miR-30e-5p	ENSG00000198668	CALM1	protein_coding	chr14	90871500	90871505	90871500	90871505	+	11	0	AGO1-4,AGO2	1	0	1	0	0	0	0	2
MIMAT0000692	hsa-miR-30e-5p	ENSG00000198668	CALM1	protein_coding	chr14	90871530	90871535	90871530	90871535	+	17	0	AGO1-4,AGO2	1	0	1	0	0	0	0	2
MIMAT0000692	hsa-miR-30e-5p	ENSG00000198668	CALM1	protein_coding	chr14	90871882	90871887	90871882	90871887	+	6	0	AGO1,AGO1-4,AGO2	1	0	1	0	0	0	0	2
MIMAT0000692	hsa-miR-30e-5p	ENSG00000165934	CPSF2	protein_coding	chr14	92629685	92629690	92629685	92629690	+	9	0	AGO1-4,AGO2	1	0	0	0	0	0	0	1
MIMAT0000692	hsa-miR-30e-5p	ENSG00000012963	UBR7	protein_coding	chr14	93694224	93694229	93694224	93694229	+	2	0	AGO1-4,AGO2	1	0	0	0	0	0	0	1
MIMAT0000692	hsa-miR-30e-5p	ENSG00000168398	BDKRB2	protein_coding	chr14	96708804	96708811	96708791	96708812	+	5	0	AGO1-4,AGO2	1	0	0	0	1	0	0	2
MIMAT0000692	hsa-miR-30e-5p	ENSG00000100744	GSKIP	protein_coding	chr14	96852859	96852865	96852838	96852866	+	9	0	AGO1-4,AGO2	1	0	1	1	1	0	1	5
MIMAT0000692	hsa-miR-30e-5p	ENSG00000100744	GSKIP	protein_coding	chr14	96852907	96852912	96852885	96852913	+	6	0	AGO1-4,AGO2	1	0	1	1	0	0	0	3
MIMAT0000692	hsa-miR-30e-5p	ENSG00000100744	GSKIP	protein_coding	chr14	96853537	96853543	96853516	96853544	+	5	0	AGO1-4,AGO2	1	0	1	1	1	0	0	4
MIMAT0000692	hsa-miR-30e-5p	ENSG00000090060	PAPOLA	protein_coding	chr14	97032526	97032547	97032526	97032547	+	2	0	AGO2	0	0	0	0	1	0	0	1
MIMAT0000692	hsa-miR-30e-5p	ENSG00000090060	PAPOLA	protein_coding	chr14	97033164	97033170	97033151	97033171	+	7	0	AGO1-4,AGO2	1	0	1	0	1	0	1	4
MIMAT0000692	hsa-miR-30e-5p	ENSG00000090061	CCNK	protein_coding	chr14	99977714	99977720	99977693	99977721	+	10	0	AGO1-4,AGO2	1	0	0	1	1	0	1	4
MIMAT0000692	hsa-miR-30e-5p	ENSG00000066629	EML1	protein_coding	chr14	100407574	100407580	100407553	100407581	+	5	0	AGO1-4,AGO2	1	0	1	1	1	0	1	5
MIMAT0000692	hsa-miR-30e-5p	ENSG00000066629	EML1	protein_coding	chr14	100408078	100408106	100408078	100408106	+	1	0	AGO1	0	0	0	1	0	0	0	1
MIMAT0000692	hsa-miR-30e-5p	ENSG00000196405	EVL	protein_coding	chr14	100610560	100610565	100610560	100610565	+	1	0	AGO2	1	0	0	0	0	0	0	1
MIMAT0000692	hsa-miR-30e-5p	ENSG00000100811	YY1	protein_coding	chr14	100746722	100746728	100746722	100746728	+	2	0	AGO1-4,AGO2	0	0	0	0	0	0	1	1
MIMAT0000692	hsa-miR-30e-5p	ENSG00000089902	RCOR1	protein_coding	chr14	103196456	103196462	103196435	103196463	+	7	0	AGO1-4,AGO2	1	0	0	1	1	0	1	4
MIMAT0000692	hsa-miR-30e-5p	ENSG00000100664	EIF5	protein_coding	chr14	103811218	103811224	103811203	103811225	+	2	0	AGO2	1	0	0	0	1	0	0	2
MIMAT0000692	hsa-miR-30e-5p	ENSG00000075413	MARK3	protein_coding	chr14	103970021	103970026	103969999	103970027	+	3	0	AGO1-4,AGO2	1	0	0	1	1	1	1	5
MIMAT0000692	hsa-miR-30e-5p	ENSG00000100711	ZFYVE21	protein_coding	chr14	104199788	104199793	104199788	104199793	+	6	0	AGO1-4,AGO2	1	0	0	0	0	0	0	1
MIMAT0000692	hsa-miR-30e-5p	ENSG00000185100	ADSSL1	protein_coding	chr14	105207475	105207499	105207475	105207499	+	1	0	AGO1-4	0	0	0	0	1	0	0	1
MIMAT0000692	hsa-miR-30e-5p	ENSG00000099814	CEP170B	protein_coding	chr14	105362579	105362585	105362558	105362586	+	1	0	AGO1-4	1	0	0	1	0	0	1	3
MIMAT0000692	hsa-miR-30e-5p	ENSG00000099814	CEP170B	protein_coding	chr14	105362647	105362653	105362626	105362654	+	5	0	AGO1-4,AGO2	1	0	0	1	0	0	1	3
MIMAT0000692	hsa-miR-30e-5p	ENSG00000179364	PACS2	protein_coding	chr14	105861082	105861087	105861082	105861087	+	3	0	AGO1-4,AGO2	1	0	0	0	0	0	0	1
MIMAT0000692	hsa-miR-30e-5p	ENSG00000182979	MTA1	protein_coding	chr14	105936765	105936771	105936751	105936772	+	13	0	AGO1-4,AGO2	1	0	0	0	1	0	1	3
MIMAT0000692	hsa-miR-30e-5p	ENSG00000184986	TMEM121	protein_coding	chr14	105996494	105996522	105996494	105996522	+	2	0	AGO2	0	0	0	1	0	0	0	1
MIMAT0000692	hsa-miR-30e-5p	ENSG00000170113	NIPA1	protein_coding	chr15	23046294	23046299	23046294	23046299	-	5	0	AGO1,AGO2	1	0	0	0	0	0	0	1
MIMAT0000692	hsa-miR-30e-5p	ENSG00000170113	NIPA1	protein_coding	chr15	23047806	23047812	23047806	23047812	-	3	0	AGO1-4	1	0	0	0	0	0	0	1
MIMAT0000692	hsa-miR-30e-5p	ENSG00000114062	UBE3A	protein_coding	chr15	25583452	25583457	25583452	25583457	-	11	0	AGO1-4,AGO2	1	0	1	0	0	0	0	2
MIMAT0000692	hsa-miR-30e-5p	ENSG00000128731	HERC2	protein_coding	chr15	28356649	28356655	28356648	28356671	-	10	0	AGO1,AGO1-4,AGO2	1	0	0	0	1	0	1	3
MIMAT0000692	hsa-miR-30e-5p	ENSG00000166912	MTMR10	protein_coding	chr15	31235189	31235217	31235189	31235217	-	1	0	AGO2	0	0	0	1	0	0	0	1
MIMAT0000692	hsa-miR-30e-5p	ENSG00000166912	MTMR10	protein_coding	chr15	31247047	31247054	31247047	31247075	-	2	0	AGO1-4,AGO2	0	0	0	1	0	0	1	2
MIMAT0000692	hsa-miR-30e-5p	ENSG00000169857	AVEN	protein_coding	chr15	34158514	34158520	34158513	34158541	-	2	0	AGO1-4,AGO2	1	0	0	1	1	0	1	4
MIMAT0000692	hsa-miR-30e-5p	ENSG00000169857	AVEN	protein_coding	chr15	34158532	34158538	34158531	34158559	-	3	0	AGO1-4,AGO2	1	0	0	1	1	0	0	3
MIMAT0000692	hsa-miR-30e-5p	ENSG00000169857	AVEN	protein_coding	chr15	34158725	34158730	34158724	34158752	-	1	0	AGO2	1	0	0	1	0	0	0	2
MIMAT0000692	hsa-miR-30e-5p	ENSG00000140199	SLC12A6	protein_coding	chr15	34522268	34522273	34522267	34522290	-	3	0	AGO2	1	0	0	0	1	1	1	4
MIMAT0000692	hsa-miR-30e-5p	ENSG00000175265	GOLGA8A	protein_coding	chr15	34672227	34672234	34672226	34672254	-	8	0	AGO1-4,AGO2	1	0	0	1	1	0	0	3
MIMAT0000692	hsa-miR-30e-5p	ENSG00000215252	GOLGA8B	protein_coding	chr15	34818448	34818454	34818447	34818468	-	19	0	AGO1,AGO1-4,AGO2	1	0	0	0	1	0	1	3
MIMAT0000692	hsa-miR-30e-5p	ENSG00000159251	ACTC1	protein_coding	chr15	35082502	35082508	35082501	35082529	-	1	0	AGO2	1	0	0	1	1	0	1	4
MIMAT0000692	hsa-miR-30e-5p	ENSG00000198146	ZNF770	protein_coding	chr15	35271615	35271620	35271614	35271642	-	1	0	AGO2	1	0	0	1	0	0	0	2
MIMAT0000692	hsa-miR-30e-5p	ENSG00000198146	ZNF770	protein_coding	chr15	35272547	35272553	35272546	35272574	-	13	0	AGO1,AGO1-4,AGO2	1	0	0	1	1	0	1	4
MIMAT0000692	hsa-miR-30e-5p	ENSG00000134138	MEIS2	protein_coding	chr15	37183465	37183471	37183464	37183492	-	7	0	AGO1-4,AGO2	1	0	0	1	1	1	1	5
MIMAT0000692	hsa-miR-30e-5p	ENSG00000103978	TMEM87A	protein_coding	chr15	42503273	42503279	42503272	42503300	-	8	0	AGO1-4,AGO2	1	0	0	1	1	0	1	4
MIMAT0000692	hsa-miR-30e-5p	ENSG00000159459	UBR1	protein_coding	chr15	43235521	43235526	43235521	43235526	-	8	0	AGO1-4,AGO2	1	0	1	0	0	0	0	2
MIMAT0000692	hsa-miR-30e-5p	ENSG00000140265	ZSCAN29	protein_coding	chr15	43650424	43650430	43650423	43650451	-	14	0	AGO1-4,AGO2	1	0	0	1	1	0	1	4
MIMAT0000692	hsa-miR-30e-5p	ENSG00000104133	SPG11	protein_coding	chr15	44855424	44855430	44855423	44855443	-	3	0	AGO1-4,AGO2	0	0	1	0	1	0	0	2
MIMAT0000692	hsa-miR-30e-5p	ENSG00000171766	GATM	protein_coding	chr15	45653467	45653473	45653466	45653494	-	5	0	AGO1-4,AGO2	1	0	0	1	1	0	1	4
MIMAT0000692	hsa-miR-30e-5p	ENSG00000104154	SLC30A4	protein_coding	chr15	45777136	45777142	45777135	45777163	-	2	0	AGO1-4	1	0	0	1	1	0	1	4
MIMAT0000692	hsa-miR-30e-5p	ENSG00000104177	MYEF2	protein_coding	chr15	48434342	48434348	48434341	48434363	-	1	0	AGO1-4	1	0	0	0	1	0	0	2
MIMAT0000692	hsa-miR-30e-5p	ENSG00000166147	FBN1	protein_coding	chr15	48933873	48933901	48933873	48933901	-	1	0	AGO2	0	0	0	1	0	0	0	1
MIMAT0000692	hsa-miR-30e-5p	ENSG00000166200	COPS2	protein_coding	chr15	49417651	49417679	49417651	49417679	-	1	0	AGO2	0	0	0	1	0	0	0	1
MIMAT0000692	hsa-miR-30e-5p	ENSG00000166200	COPS2	protein_coding	chr15	49417937	49417958	49417937	49417965	-	2	0	AGO1-4,AGO2	0	0	0	1	1	0	0	2
MIMAT0000692	hsa-miR-30e-5p	ENSG00000166200	COPS2	protein_coding	chr15	49419130	49419158	49419130	49419158	-	8	0	AGO1-4,AGO2	0	0	0	1	0	0	0	1
MIMAT0000692	hsa-miR-30e-5p	ENSG00000092439	TRPM7	protein_coding	chr15	50852493	50852499	50852492	50852520	-	2	0	AGO1-4,AGO2	1	0	1	1	1	0	1	5
MIMAT0000692	hsa-miR-30e-5p	ENSG00000104093	DMXL2	protein_coding	chr15	51740137	51740144	51740136	51740164	-	1	0	AGO2	1	0	0	1	1	0	0	3
MIMAT0000692	hsa-miR-30e-5p	ENSG00000104093	DMXL2	protein_coding	chr15	51766694	51766722	51766694	51766722	-	2	0	AGO1-4,AGO2	0	0	0	1	0	0	0	1
MIMAT0000692	hsa-miR-30e-5p	ENSG00000104093	DMXL2	protein_coding	chr15	51839488	51839516	51839488	51839516	-	1	0	AGO1-4	0	0	0	1	0	0	0	1
MIMAT0000692	hsa-miR-30e-5p	ENSG00000197535	MYO5A	protein_coding	chr15	52605185	52605190	52605184	52605212	-	11	0	AGO1-4,AGO2	1	0	0	1	1	1	1	5
MIMAT0000692	hsa-miR-30e-5p	ENSG00000197535	MYO5A	protein_coding	chr15	52605276	52605281	52605275	52605303	-	10	0	AGO1-4,AGO2	1	0	0	1	0	0	0	2
MIMAT0000692	hsa-miR-30e-5p	ENSG00000197535	MYO5A	protein_coding	chr15	52605649	52605654	52605648	52605676	-	3	0	AGO1-4,AGO2	1	0	0	1	0	0	0	2
MIMAT0000692	hsa-miR-30e-5p	ENSG00000128989	ARPP19	protein_coding	chr15	52842412	52842417	52842412	52842417	-	10	0	AGO1,AGO1-4,AGO2	1	0	0	0	0	0	0	1
MIMAT0000692	hsa-miR-30e-5p	ENSG00000128989	ARPP19	protein_coding	chr15	52843263	52843268	52843263	52843268	-	10	0	AGO1-4,AGO2	1	0	0	0	0	0	0	1
MIMAT0000692	hsa-miR-30e-5p	ENSG00000047346	FAM214A	protein_coding	chr15	52874087	52874093	52874086	52874114	-	8	0	AGO1-4,AGO2	1	0	1	1	1	0	1	5
MIMAT0000692	hsa-miR-30e-5p	ENSG00000260916	CCPG1	protein_coding	chr15	55647692	55647698	55647691	55647712	-	1	0	AGO2	1	0	0	0	1	0	0	2
MIMAT0000692	hsa-miR-30e-5p	ENSG00000171016	PYGO1	protein_coding	chr15	55833074	55833080	55833073	55833080	-	1	0	AGO2	0	0	1	0	0	0	1	2
MIMAT0000692	hsa-miR-30e-5p	ENSG00000166450	PRTG	protein_coding	chr15	55908995	55909001	55908995	55909001	-	3	0	AGO1-4,AGO2	0	0	0	0	0	1	1	2
MIMAT0000692	hsa-miR-30e-5p	ENSG00000069869	NEDD4	protein_coding	chr15	56120973	56120979	56120972	56121000	-	3	0	AGO1-4,AGO2	1	0	1	1	1	0	1	5
MIMAT0000692	hsa-miR-30e-5p	ENSG00000069869	NEDD4	protein_coding	chr15	56121129	56121134	56121128	56121156	-	13	0	AGO1-4,AGO2	1	0	1	1	1	1	1	6
MIMAT0000692	hsa-miR-30e-5p	ENSG00000069869	NEDD4	protein_coding	chr15	56121147	56121152	56121146	56121174	-	13	0	AGO1-4,AGO2	1	0	1	1	1	1	1	6
MIMAT0000692	hsa-miR-30e-5p	ENSG00000069869	NEDD4	protein_coding	chr15	56121469	56121475	56121468	56121496	-	9	1	AGO1-4,AGO2	1	0	1	1	1	0	0	4
MIMAT0000692	hsa-miR-30e-5p	ENSG00000181827	RFX7	protein_coding	chr15	56383166	56383172	56383165	56383193	-	12	0	AGO1-4,AGO2	1	0	1	1	1	0	1	5
MIMAT0000692	hsa-miR-30e-5p	ENSG00000181827	RFX7	protein_coding	chr15	56383710	56383716	56383709	56383737	-	12	0	AGO1,AGO1-4,AGO2	1	0	1	1	1	0	1	5
MIMAT0000692	hsa-miR-30e-5p	ENSG00000138587	MNS1	protein_coding	chr15	56720977	56720995	56720977	56720995	-	1	0	AGO1-4	0	0	0	0	1	0	0	1
MIMAT0000692	hsa-miR-30e-5p	ENSG00000137845	ADAM10	protein_coding	chr15	58888268	58888274	58888268	58888274	-	16	0	AGO1,AGO1-4,AGO2	0	0	0	0	0	0	1	1
MIMAT0000692	hsa-miR-30e-5p	ENSG00000157483	MYO1E	protein_coding	chr15	59429009	59429014	59429009	59429014	-	5	0	AGO1,AGO1-4,AGO2,AGO3	1	0	0	0	0	0	0	1
MIMAT0000692	hsa-miR-30e-5p	ENSG00000128915	ICE2	protein_coding	chr15	60743639	60743662	60743639	60743662	-	1	0	AGO1-4	0	0	0	0	1	0	0	1
MIMAT0000692	hsa-miR-30e-5p	ENSG00000069667	RORA	protein_coding	chr15	60781578	60781584	60781577	60781605	-	6	0	AGO1,AGO1-4,AGO2	0	0	1	1	0	0	1	3
MIMAT0000692	hsa-miR-30e-5p	ENSG00000069667	RORA	protein_coding	chr15	60782831	60782837	60782830	60782858	-	1	0	AGO2	0	0	1	1	0	1	1	4
MIMAT0000692	hsa-miR-30e-5p	ENSG00000069667	RORA	protein_coding	chr15	60788867	60788872	60788866	60788894	-	14	0	AGO1-4,AGO2	0	0	1	1	0	1	1	4
MIMAT0000692	hsa-miR-30e-5p	ENSG00000069667	RORA	protein_coding	chr15	60789385	60789413	60789385	60789413	-	1	0	AGO2	0	0	0	1	0	0	0	1
MIMAT0000692	hsa-miR-30e-5p	ENSG00000129003	VPS13C	protein_coding	chr15	62144598	62144619	62144598	62144626	-	1	0	AGO2	0	0	0	1	1	0	0	2
MIMAT0000692	hsa-miR-30e-5p	ENSG00000129003	VPS13C	protein_coding	chr15	62173075	62173103	62173075	62173103	-	4	0	AGO1-4,AGO2	0	0	0	1	0	0	0	1
MIMAT0000692	hsa-miR-30e-5p	ENSG00000169118	CSNK1G1	protein_coding	chr15	64463786	64463791	64463786	64463791	-	5	0	AGO1-4,AGO2	1	0	0	0	0	0	0	1
MIMAT0000692	hsa-miR-30e-5p	ENSG00000169118	CSNK1G1	protein_coding	chr15	64463847	64463853	64463846	64463867	-	28	0	AGO1,AGO1-4,AGO2	1	0	0	0	1	0	1	3
MIMAT0000692	hsa-miR-30e-5p	ENSG00000166803	PCLAF	protein_coding	chr15	64658189	64658195	64658188	64658209	-	21	0	AGO1,AGO1-4,AGO2	1	0	0	0	2	0	1	4
MIMAT0000692	hsa-miR-30e-5p	ENSG00000259316	AC087632.1	protein_coding	chr15	64658189	64658195	64658188	64658209	-	21	0	AGO1,AGO1-4,AGO2	1	0	0	0	2	0	1	4
MIMAT0000692	hsa-miR-30e-5p	ENSG00000138617	PARP16	protein_coding	chr15	65551403	65551409	65551402	65551430	-	3	0	AGO1-4,AGO2	1	0	0	1	1	0	1	4
MIMAT0000692	hsa-miR-30e-5p	ENSG00000137831	UACA	protein_coding	chr15	70947984	70947989	70947983	70948011	-	1	0	AGO2	1	0	1	1	0	0	0	3
MIMAT0000692	hsa-miR-30e-5p	ENSG00000137831	UACA	protein_coding	chr15	70970454	70970482	70970454	70970482	-	3	0	AGO1-4,AGO2	0	0	0	1	0	0	0	1
MIMAT0000692	hsa-miR-30e-5p	ENSG00000067221	STOML1	protein_coding	chr15	74275566	74275572	74275565	74275593	-	2	0	AGO2	1	0	1	1	1	0	1	5
MIMAT0000692	hsa-miR-30e-5p	ENSG00000179151	EDC3	protein_coding	chr15	74924638	74924643	74924637	74924665	-	19	0	AGO1,AGO1-4,AGO2	1	0	0	1	0	0	1	3
MIMAT0000692	hsa-miR-30e-5p	ENSG00000179151	EDC3	protein_coding	chr15	74924676	74924682	74924675	74924703	-	24	0	AGO1,AGO1-4,AGO2	1	0	0	1	1	0	1	4
MIMAT0000692	hsa-miR-30e-5p	ENSG00000178761	FAM219B	protein_coding	chr15	75194065	75194071	75194064	75194085	-	4	0	AGO1,AGO2	1	0	0	0	1	0	0	2
MIMAT0000692	hsa-miR-30e-5p	ENSG00000173517	PEAK1	protein_coding	chr15	77404946	77404952	77404946	77404952	-	8	0	AGO1,AGO1-4,AGO2	1	0	0	0	0	0	1	2
MIMAT0000692	hsa-miR-30e-5p	ENSG00000173517	PEAK1	protein_coding	chr15	77405510	77405515	77405510	77405515	-	1	0	AGO1-4	1	0	0	0	0	0	0	1
MIMAT0000692	hsa-miR-30e-5p	ENSG00000167202	TBC1D2B	protein_coding	chr15	78290314	78290320	78290313	78290341	-	8	0	AGO1-4,AGO2	1	0	0	1	1	0	1	4
MIMAT0000692	hsa-miR-30e-5p	ENSG00000117899	MESD	protein_coding	chr15	81271328	81271335	81271327	81271355	-	9	0	AGO1,AGO1-4,AGO2	1	0	0	1	1	0	0	3
MIMAT0000692	hsa-miR-30e-5p	ENSG00000183496	MEX3B	protein_coding	chr15	82334396	82334402	82334395	82334423	-	11	0	AGO1-4,AGO2	1	0	1	1	1	0	1	5
MIMAT0000692	hsa-miR-30e-5p	ENSG00000183496	MEX3B	protein_coding	chr15	82334797	82334803	82334796	82334824	-	10	0	AGO1-4,AGO2	1	0	1	1	1	0	1	5
MIMAT0000692	hsa-miR-30e-5p	ENSG00000169609	C15orf40	protein_coding	chr15	83673566	83673571	83673565	83673593	-	4	0	AGO1,AGO2	1	0	0	1	0	0	0	2
MIMAT0000692	hsa-miR-30e-5p	ENSG00000064726	BTBD1	protein_coding	chr15	83685237	83685243	83685236	83685259	-	17	0	AGO1,AGO1-4,AGO2	1	0	0	0	1	0	0	2
MIMAT0000692	hsa-miR-30e-5p	ENSG00000166503	HDGFL3	protein_coding	chr15	83806991	83806996	83806990	83807018	-	6	0	AGO1-4,AGO2	1	0	0	1	1	0	0	3
MIMAT0000692	hsa-miR-30e-5p	ENSG00000169594	BNC1	protein_coding	chr15	83925920	83925926	83925919	83925947	-	1	0	AGO1-4	1	0	0	1	1	0	1	4
MIMAT0000692	hsa-miR-30e-5p	ENSG00000140543	DET1	protein_coding	chr15	89055803	89055809	89055802	89055824	-	4	0	AGO1-4,AGO2	1	0	1	0	1	0	0	3
MIMAT0000692	hsa-miR-30e-5p	ENSG00000198901	PRC1	protein_coding	chr15	91509351	91509357	91509350	91509370	-	15	0	AGO1,AGO1-4,AGO2	1	0	0	0	1	0	0	2
MIMAT0000692	hsa-miR-30e-5p	ENSG00000131871	SELENOS	protein_coding	chr15	101811462	101811468	101811461	101811489	-	1	0	AGO2	1	0	0	1	1	0	0	3
MIMAT0000692	hsa-miR-30e-5p	ENSG00000140479	PCSK6	protein_coding	chr15	101845155	101845160	101845155	101845160	-	1	0	AGO1-4	1	0	0	0	0	0	0	1
MIMAT0000692	hsa-miR-30e-5p	ENSG00000185418	TARSL2	protein_coding	chr15	102215892	102215920	102215892	102215920	-	1	0	AGO2	0	0	0	1	0	0	0	1
MIMAT0000692	hsa-miR-30e-5p	ENSG00000275835	TUBGCP5	protein_coding	chr15	22873772	22873778	22873758	22873779	+	3	0	AGO2	1	0	0	0	1	0	0	2
MIMAT0000692	hsa-miR-30e-5p	ENSG00000179455	MKRN3	protein_coding	chr15	23812865	23812888	23812865	23812888	+	1	0	AGO2	0	0	0	0	1	0	0	1
MIMAT0000692	hsa-miR-30e-5p	ENSG00000179455	MKRN3	protein_coding	chr15	23812982	23812988	23812969	23812989	+	13	0	AGO1,AGO1-4,AGO2,AGO3	1	0	1	0	1	0	1	4
MIMAT0000692	hsa-miR-30e-5p	ENSG00000198690	FAN1	protein_coding	chr15	31203359	31203365	31203343	31203366	+	1	0	AGO1-4	0	0	1	0	1	0	0	2
MIMAT0000692	hsa-miR-30e-5p	ENSG00000198826	ARHGAP11A	protein_coding	chr15	32930595	32930601	32930579	32930602	+	8	0	AGO1,AGO1-4,AGO2	1	0	0	0	1	0	0	2
MIMAT0000692	hsa-miR-30e-5p	ENSG00000128463	EMC4	protein_coding	chr15	34520715	34520722	34520694	34520722	+	2	0	AGO1-4,AGO2	0	0	0	1	1	0	1	3
MIMAT0000692	hsa-miR-30e-5p	ENSG00000140320	BAHD1	protein_coding	chr15	40760329	40760334	40760307	40760335	+	8	0	AGO1-4,AGO2	1	0	0	1	1	1	1	5
MIMAT0000692	hsa-miR-30e-5p	ENSG00000128917	DLL4	protein_coding	chr15	41230291	41230297	41230270	41230298	+	1	0	AGO1-4	1	0	0	1	1	0	1	4
MIMAT0000692	hsa-miR-30e-5p	ENSG00000137815	RTF1	protein_coding	chr15	41774726	41774731	41774726	41774731	+	5	0	AGO1-4,AGO2	1	0	0	0	0	0	0	1
MIMAT0000692	hsa-miR-30e-5p	ENSG00000137802	MAPKBP1	protein_coding	chr15	42118521	42118526	42118521	42118526	+	4	0	AGO1-4,AGO2	1	0	0	0	0	0	0	1
MIMAT0000692	hsa-miR-30e-5p	ENSG00000137770	CTDSPL2	protein_coding	chr15	44817858	44817864	44817844	44817865	+	7	0	AGO1,AGO2	1	0	0	0	1	0	1	3
MIMAT0000692	hsa-miR-30e-5p	ENSG00000104164	BLOC1S6	protein_coding	chr15	45900189	45900195	45900170	45900196	+	15	0	AGO1,AGO1-4,AGO2,AGO3	1	0	0	0	1	0	0	2
MIMAT0000692	hsa-miR-30e-5p	ENSG00000137872	SEMA6D	protein_coding	chr15	48064645	48064651	48064624	48064652	+	6	0	AGO2	1	0	0	1	1	0	1	4
MIMAT0000692	hsa-miR-30e-5p	ENSG00000137872	SEMA6D	protein_coding	chr15	48065250	48065255	48065228	48065256	+	2	0	AGO2	1	0	0	1	0	0	0	2
MIMAT0000692	hsa-miR-30e-5p	ENSG00000104047	DTWD1	protein_coding	chr15	49936445	49936466	49936445	49936466	+	1	0	AGO1-4	0	0	0	0	1	0	0	1
MIMAT0000692	hsa-miR-30e-5p	ENSG00000081014	AP4E1	protein_coding	chr15	51294898	51294903	51294876	51294904	+	1	0	AGO2	1	0	1	1	1	0	1	5
MIMAT0000692	hsa-miR-30e-5p	ENSG00000081014	AP4E1	protein_coding	chr15	51295180	51295185	51295158	51295186	+	1	0	AGO2	1	0	1	1	0	0	0	3
MIMAT0000692	hsa-miR-30e-5p	ENSG00000128872	TMOD2	protein_coding	chr15	52101039	52101045	52101018	52101046	+	2	0	AGO1-4,AGO2	1	0	0	1	0	0	1	3
MIMAT0000692	hsa-miR-30e-5p	ENSG00000137766	UNC13C	protein_coding	chr15	54556501	54556529	54556501	54556529	+	1	0	AGO2	0	0	0	1	0	0	0	1
MIMAT0000692	hsa-miR-30e-5p	ENSG00000255529	POLR2M	protein_coding	chr15	58009706	58009711	58009706	58009711	+	8	0	AGO1,AGO1-4,AGO2,AGO3	1	0	0	0	0	0	0	1
MIMAT0000692	hsa-miR-30e-5p	ENSG00000157450	RNF111	protein_coding	chr15	59388663	59388668	59388648	59388669	+	7	0	AGO1-4,AGO2	1	0	0	0	1	0	0	2
MIMAT0000692	hsa-miR-30e-5p	ENSG00000157470	FAM81A	protein_coding	chr15	59813721	59813727	59813700	59813728	+	1	0	AGO1-4	1	0	1	1	1	0	1	5
MIMAT0000692	hsa-miR-30e-5p	ENSG00000157470	FAM81A	protein_coding	chr15	59815010	59815016	59814989	59815017	+	4	0	AGO1-4,AGO2	1	0	1	1	1	0	1	5
MIMAT0000692	hsa-miR-30e-5p	ENSG00000171956	FOXB1	protein_coding	chr15	60298889	60298896	60298889	60298896	+	4	0	AGO2	0	0	0	0	0	0	1	1
MIMAT0000692	hsa-miR-30e-5p	ENSG00000171956	FOXB1	protein_coding	chr15	60298993	60298999	60298993	60298999	+	11	0	AGO1,AGO2,AGO3	0	0	0	0	0	0	1	1
MIMAT0000692	hsa-miR-30e-5p	ENSG00000103642	LACTB	protein_coding	chr15	63422288	63422293	63422288	63422293	+	1	0	AGO2	0	0	1	0	0	0	0	1
MIMAT0000692	hsa-miR-30e-5p	ENSG00000028528	SNX1	protein_coding	chr15	64431663	64431669	64431642	64431670	+	2	0	AGO2	1	0	1	1	1	0	0	4
MIMAT0000692	hsa-miR-30e-5p	ENSG00000028528	SNX1	protein_coding	chr15	64436063	64436069	64436042	64436070	+	1	0	AGO1-4	1	0	1	1	0	0	1	4
MIMAT0000692	hsa-miR-30e-5p	ENSG00000241839	PLEKHO2	protein_coding	chr15	65158455	65158460	65158433	65158461	+	1	0	AGO1-4	1	0	0	1	0	0	1	3
MIMAT0000692	hsa-miR-30e-5p	ENSG00000241839	PLEKHO2	protein_coding	chr15	65159402	65159408	65159381	65159409	+	21	0	AGO1,AGO1-4,AGO2	1	0	0	1	1	0	1	4
MIMAT0000692	hsa-miR-30e-5p	ENSG00000103769	RAB11A	protein_coding	chr15	66180428	66180434	66180407	66180435	+	9	0	AGO1,AGO1-4,AGO2	1	0	1	1	1	0	1	5
MIMAT0000692	hsa-miR-30e-5p	ENSG00000103769	RAB11A	protein_coding	chr15	66184089	66184095	66184068	66184096	+	1	0	AGO2	0	0	1	1	0	0	0	2
MIMAT0000692	hsa-miR-30e-5p	ENSG00000033800	PIAS1	protein_coding	chr15	68483732	68483738	68483732	68483738	+	6	0	AGO1-4,AGO2	0	0	0	0	0	0	1	1
MIMAT0000692	hsa-miR-30e-5p	ENSG00000138604	GLCE	protein_coding	chr15	69563897	69563903	69563876	69563904	+	6	0	AGO1,AGO2	1	0	1	1	1	0	1	5
MIMAT0000692	hsa-miR-30e-5p	ENSG00000138604	GLCE	protein_coding	chr15	69564330	69564336	69564309	69564337	+	17	0	AGO1,AGO1-4,AGO2	1	0	1	1	1	0	1	5
MIMAT0000692	hsa-miR-30e-5p	ENSG00000166192	SENP8	protein_coding	chr15	72432871	72432876	72432871	72432876	+	4	0	AGO1-4,AGO2	1	0	0	0	0	0	0	1
MIMAT0000692	hsa-miR-30e-5p	ENSG00000166233	ARIH1	protein_coding	chr15	72877329	72877335	72877314	72877336	+	2	0	AGO1-4,AGO2	0	0	0	0	1	0	1	2
MIMAT0000692	hsa-miR-30e-5p	ENSG00000178802	MPI	protein_coding	chr15	75190521	75190527	75190506	75190528	+	5	0	AGO1-4,AGO2	1	0	0	0	1	0	0	2
MIMAT0000692	hsa-miR-30e-5p	ENSG00000173548	SNX33	protein_coding	chr15	75950791	75950797	75950770	75950798	+	3	0	AGO1-4,AGO2	1	0	0	1	1	0	1	4
MIMAT0000692	hsa-miR-30e-5p	ENSG00000136381	IREB2	protein_coding	chr15	78792848	78792854	78792833	78792855	+	14	0	AGO1-4,AGO2	1	0	0	0	1	0	0	2
MIMAT0000692	hsa-miR-30e-5p	ENSG00000156232	WHAMM	protein_coding	chr15	83503270	83503275	83503270	83503275	+	11	0	AGO1,AGO1-4,AGO2	1	0	0	0	0	0	0	1
MIMAT0000692	hsa-miR-30e-5p	ENSG00000136383	ALPK3	protein_coding	chr15	85411949	85411977	85411949	85411977	+	1	0	AGO2	0	0	0	1	0	0	0	1
MIMAT0000692	hsa-miR-30e-5p	ENSG00000170776	AKAP13	protein_coding	chr15	86288712	86288719	86288712	86288719	+	1	0	AGO1-4	1	0	0	0	0	0	0	1
MIMAT0000692	hsa-miR-30e-5p	ENSG00000140526	ABHD2	protein_coding	chr15	89739712	89739717	89739712	89739717	+	1	0	AGO2	1	0	0	0	0	0	0	1
MIMAT0000692	hsa-miR-30e-5p	ENSG00000140526	ABHD2	protein_coding	chr15	89741702	89741707	89741702	89741707	+	1	0	AGO1-4	1	0	0	0	0	0	0	1
MIMAT0000692	hsa-miR-30e-5p	ENSG00000140526	ABHD2	protein_coding	chr15	89744756	89744762	89744756	89744762	+	5	0	AGO1,AGO1-4,AGO2	1	0	0	0	0	0	0	1
MIMAT0000692	hsa-miR-30e-5p	ENSG00000140575	IQGAP1	protein_coding	chr15	91045100	91045105	91045100	91045105	+	18	0	AGO1-4,AGO2	1	0	0	0	0	0	0	1
MIMAT0000692	hsa-miR-30e-5p	ENSG00000197299	BLM	protein_coding	chr15	91303367	91303395	91303367	91303395	+	1	0	AGO1-4	0	0	0	1	0	0	0	1
MIMAT0000692	hsa-miR-30e-5p	ENSG00000197299	BLM	protein_coding	chr15	91303984	91304012	91303984	91304012	+	2	0	AGO2	0	0	0	1	0	0	0	1
MIMAT0000692	hsa-miR-30e-5p	ENSG00000185551	NR2F2	protein_coding	chr15	96881878	96881883	96881856	96881884	+	15	0	AGO1-4,AGO2	1	0	0	1	0	0	1	3
MIMAT0000692	hsa-miR-30e-5p	ENSG00000140450	ARRDC4	protein_coding	chr15	98515375	98515381	98515361	98515382	+	12	0	AGO1-4,AGO2	1	0	0	0	1	0	0	2
MIMAT0000692	hsa-miR-30e-5p	ENSG00000140443	IGF1R	protein_coding	chr15	99506300	99506305	99506278	99506306	+	31	0	AGO1-4,AGO2	1	0	0	1	0	0	1	3
MIMAT0000692	hsa-miR-30e-5p	ENSG00000140443	IGF1R	protein_coding	chr15	99506469	99506475	99506448	99506489	+	10	1	AGO1,AGO1-4,AGO2	1	0	0	2	0	0	0	3
MIMAT0000692	hsa-miR-30e-5p	ENSG00000168904	LRRC28	protein_coding	chr15	99903404	99903410	99903389	99903411	+	1	0	AGO1-4	0	0	0	0	1	0	1	2
MIMAT0000692	hsa-miR-30e-5p	ENSG00000059145	UNKL	protein_coding	chr16	1413262	1413267	1413261	1413289	-	15	0	AGO1-4,AGO2	1	0	0	1	0	0	1	3
MIMAT0000692	hsa-miR-30e-5p	ENSG00000059145	UNKL	protein_coding	chr16	1414499	1414504	1414499	1414504	-	4	0	AGO1-4,AGO2	1	0	0	0	0	0	0	1
MIMAT0000692	hsa-miR-30e-5p	ENSG00000184207	PGP	protein_coding	chr16	2263549	2263555	2263548	2263569	-	5	0	AGO1,AGO1-4,AGO2	1	0	0	0	1	0	1	3
MIMAT0000692	hsa-miR-30e-5p	ENSG00000167972	ABCA3	protein_coding	chr16	2326300	2326305	2326300	2326305	-	3	0	AGO2	1	0	0	0	0	0	0	1
MIMAT0000692	hsa-miR-30e-5p	ENSG00000010539	ZNF200	protein_coding	chr16	3273359	3273365	3273358	3273386	-	8	0	AGO1-4,AGO2	1	0	1	1	1	0	1	5
MIMAT0000692	hsa-miR-30e-5p	ENSG00000103174	NAGPA	protein_coding	chr16	5074941	5074947	5074940	5074968	-	2	0	AGO1-4,AGO2	1	0	0	1	1	0	1	4
MIMAT0000692	hsa-miR-30e-5p	ENSG00000187555	USP7	protein_coding	chr16	8987152	8987157	8987152	8987157	-	4	0	AGO1-4,AGO2	1	0	0	0	0	0	0	1
MIMAT0000692	hsa-miR-30e-5p	ENSG00000183454	GRIN2A	protein_coding	chr16	9853358	9853365	9853358	9853386	-	1	0	AGO2	0	0	0	1	0	0	1	2
MIMAT0000692	hsa-miR-30e-5p	ENSG00000182108	DEXI	protein_coding	chr16	11023201	11023207	11023200	11023224	-	1	0	AGO1-4	1	0	0	0	1	0	1	3
MIMAT0000692	hsa-miR-30e-5p	ENSG00000185338	SOCS1	protein_coding	chr16	11348409	11348415	11348408	11348436	-	36	0	AGO1-4,AGO2	1	0	0	1	1	0	1	4
MIMAT0000692	hsa-miR-30e-5p	ENSG00000103342	GSPT1	protein_coding	chr16	11962822	11962842	11962822	11962842	-	1	0	AGO1-4	0	0	0	0	1	0	0	1
MIMAT0000692	hsa-miR-30e-5p	ENSG00000085721	RRN3	protein_coding	chr16	15154416	15154422	15154415	15154443	-	14	0	AGO1-4,AGO2	1	0	0	1	1	0	0	3
MIMAT0000692	hsa-miR-30e-5p	ENSG00000133392	MYH11	protein_coding	chr16	15797044	15797050	15797043	15797071	-	1	0	AGO1-4	1	0	0	1	1	0	0	3
MIMAT0000692	hsa-miR-30e-5p	ENSG00000133392	MYH11	protein_coding	chr16	15797276	15797282	15797275	15797303	-	1	0	AGO1-4	1	0	0	1	1	0	0	3
MIMAT0000692	hsa-miR-30e-5p	ENSG00000133393	FOPNL	protein_coding	chr16	15959788	15959793	15959788	15959793	-	14	0	AGO1,AGO1-4,AGO2,AGO3	1	0	0	0	0	0	0	1
MIMAT0000692	hsa-miR-30e-5p	ENSG00000103489	XYLT1	protein_coding	chr16	17197759	17197765	17197759	17197765	-	2	0	AGO1-4	1	0	0	0	0	0	0	1
MIMAT0000692	hsa-miR-30e-5p	ENSG00000103489	XYLT1	protein_coding	chr16	17197897	17197902	17197897	17197902	-	2	0	AGO1-4	1	0	0	0	0	0	0	1
MIMAT0000692	hsa-miR-30e-5p	ENSG00000170540	ARL6IP1	protein_coding	chr16	18804112	18804117	18804112	18804117	-	8	0	AGO1-4,AGO2	1	0	0	0	0	0	0	1
MIMAT0000692	hsa-miR-30e-5p	ENSG00000006007	GDE1	protein_coding	chr16	19513665	19513671	19513664	19513685	-	4	0	AGO1-4,AGO2	1	0	0	0	1	0	0	2
MIMAT0000692	hsa-miR-30e-5p	ENSG00000180269	GPR139	protein_coding	chr16	20043659	20043687	20043659	20043687	-	2	0	AGO1-4	0	0	0	1	0	0	0	1
MIMAT0000692	hsa-miR-30e-5p	ENSG00000196678	ERI2	protein_coding	chr16	20808942	20808948	20808941	20808962	-	6	0	AGO1,AGO1-4,AGO2	0	0	1	0	1	0	0	2
MIMAT0000692	hsa-miR-30e-5p	ENSG00000188215	DCUN1D3	protein_coding	chr16	20866252	20866258	20866252	20866258	-	5	0	AGO1-4,AGO2	0	0	0	0	0	0	1	1
MIMAT0000692	hsa-miR-30e-5p	ENSG00000188215	DCUN1D3	protein_coding	chr16	20870726	20870732	20870725	20870753	-	8	0	AGO1-4,AGO2	1	0	0	1	1	0	1	4
MIMAT0000692	hsa-miR-30e-5p	ENSG00000149927	DOC2A	protein_coding	chr16	30017428	30017433	30017427	30017455	-	3	0	AGO1,AGO1-4,AGO2	1	0	0	1	0	0	1	3
MIMAT0000692	hsa-miR-30e-5p	ENSG00000169221	TBC1D10B	protein_coding	chr16	30368496	30368502	30368495	30368523	-	22	0	AGO1,AGO1-4,AGO2	1	0	1	1	1	0	1	5
MIMAT0000692	hsa-miR-30e-5p	ENSG00000155330	C16orf87	protein_coding	chr16	46831114	46831142	46831114	46831142	-	1	0	AGO1-4	0	0	0	1	0	0	0	1
MIMAT0000692	hsa-miR-30e-5p	ENSG00000155330	C16orf87	protein_coding	chr16	46836666	46836672	46836665	46836693	-	2	0	AGO1-4	1	0	0	1	1	0	1	4
MIMAT0000692	hsa-miR-30e-5p	ENSG00000172775	FAM192A	protein_coding	chr16	57187414	57187420	57187413	57187434	-	1	0	AGO1-4	1	0	0	0	1	0	0	2
MIMAT0000692	hsa-miR-30e-5p	ENSG00000005194	CIAPIN1	protein_coding	chr16	57462660	57462665	57462660	57462665	-	3	0	AGO1-4,AGO2	1	0	0	0	0	0	0	1
MIMAT0000692	hsa-miR-30e-5p	ENSG00000070770	CSNK2A2	protein_coding	chr16	58196462	58196490	58196462	58196490	-	9	0	AGO1,AGO2	0	0	0	1	0	0	0	1
MIMAT0000692	hsa-miR-30e-5p	ENSG00000103042	SLC38A7	protein_coding	chr16	58700604	58700610	58700603	58700631	-	8	0	AGO1-4,AGO2	1	0	0	1	1	0	1	4
MIMAT0000692	hsa-miR-30e-5p	ENSG00000125166	GOT2	protein_coding	chr16	58741815	58741820	58741814	58741820	-	2	0	AGO1-4	1	0	0	0	0	0	1	2
MIMAT0000692	hsa-miR-30e-5p	ENSG00000140937	CDH11	protein_coding	chr16	64977731	64977737	64977709	64977759	-	1	0	AGO1-4	0	0	0	2	0	0	0	2
MIMAT0000692	hsa-miR-30e-5p	ENSG00000135720	DYNC1LI2	protein_coding	chr16	66756210	66756215	66756210	66756215	-	14	0	AGO1-4,AGO2	1	0	1	0	0	0	0	2
MIMAT0000692	hsa-miR-30e-5p	ENSG00000135720	DYNC1LI2	protein_coding	chr16	66756799	66756804	66756799	66756804	-	1	0	AGO1-4	1	0	1	0	0	0	0	2
MIMAT0000692	hsa-miR-30e-5p	ENSG00000141084	RANBP10	protein_coding	chr16	67757891	67757897	67757890	67757911	-	1	0	AGO1-4	1	0	0	0	1	0	1	3
MIMAT0000692	hsa-miR-30e-5p	ENSG00000140836	ZFHX3	protein_coding	chr16	72817204	72817210	72817203	72817231	-	5	0	AGO1-4,AGO2	1	0	0	1	1	0	1	4
MIMAT0000692	hsa-miR-30e-5p	ENSG00000153774	CFDP1	protein_coding	chr16	75327811	75327817	75327810	75327832	-	10	1	AGO1-4,AGO2	1	0	0	0	1	0	1	3
MIMAT0000692	hsa-miR-30e-5p	ENSG00000166822	TMEM170A	protein_coding	chr16	75477560	75477579	75477560	75477588	-	9	0	AGO1,AGO1-4,AGO2	0	0	0	1	1	0	0	2
MIMAT0000692	hsa-miR-30e-5p	ENSG00000166822	TMEM170A	protein_coding	chr16	75480471	75480492	75480471	75480499	-	2	0	AGO1-4	0	0	0	1	1	0	0	2
MIMAT0000692	hsa-miR-30e-5p	ENSG00000205084	TMEM231	protein_coding	chr16	75572537	75572542	75572537	75572542	-	1	0	AGO1-4	1	0	0	0	0	0	0	1
MIMAT0000692	hsa-miR-30e-5p	ENSG00000178573	MAF	protein_coding	chr16	79631066	79631072	79631065	79631084	-	4	0	AGO1,AGO2	1	0	0	0	1	0	1	3
MIMAT0000692	hsa-miR-30e-5p	ENSG00000135698	MPHOSPH6	protein_coding	chr16	82182230	82182235	82182229	82182250	-	4	0	AGO1,AGO1-4,AGO2	1	0	0	0	1	0	0	2
MIMAT0000692	hsa-miR-30e-5p	ENSG00000103187	COTL1	protein_coding	chr16	84599233	84599261	84599233	84599261	-	1	1	AGO2	0	0	0	1	0	0	0	1
MIMAT0000692	hsa-miR-30e-5p	ENSG00000153786	ZDHHC7	protein_coding	chr16	85009505	85009510	85009505	85009510	-	6	0	AGO1-4,AGO2	1	0	0	0	0	0	0	1
MIMAT0000692	hsa-miR-30e-5p	ENSG00000131148	EMC8	protein_coding	chr16	85812437	85812442	85812437	85812442	-	2	0	AGO1-4	1	0	0	0	0	0	0	1
MIMAT0000692	hsa-miR-30e-5p	ENSG00000140948	ZCCHC14	protein_coding	chr16	87441995	87442001	87441994	87442022	-	10	0	AGO1-4,AGO2	1	0	0	1	1	0	1	4
MIMAT0000692	hsa-miR-30e-5p	ENSG00000140948	ZCCHC14	protein_coding	chr16	87443142	87443147	87443141	87443169	-	11	0	AGO1,AGO1-4,AGO2	1	0	0	1	0	0	0	2
MIMAT0000692	hsa-miR-30e-5p	ENSG00000103257	SLC7A5	protein_coding	chr16	87866300	87866306	87866299	87866320	-	11	0	AGO1,AGO1-4,AGO2	1	0	0	0	1	0	0	2
MIMAT0000692	hsa-miR-30e-5p	ENSG00000131165	CHMP1A	protein_coding	chr16	89711336	89711341	89711336	89711341	-	3	0	AGO1-4,AGO2	1	0	0	0	0	0	0	1
MIMAT0000692	hsa-miR-30e-5p	ENSG00000103275	UBE2I	protein_coding	chr16	1374847	1374852	1374825	1374853	+	8	0	AGO1-4,AGO2	1	0	1	1	1	1	1	6
MIMAT0000692	hsa-miR-30e-5p	ENSG00000206053	JPT2	protein_coding	chr16	1751126	1751131	1751126	1751131	+	12	0	AGO1-4,AGO2	1	0	0	0	0	0	0	1
MIMAT0000692	hsa-miR-30e-5p	ENSG00000180185	FAHD1	protein_coding	chr16	1878704	1878710	1878683	1878711	+	2	0	AGO1,AGO1-4	1	0	1	1	1	0	0	4
MIMAT0000692	hsa-miR-30e-5p	ENSG00000127561	SYNGR3	protein_coding	chr16	2044153	2044158	2044131	2044159	+	2	0	AGO1-4,AGO2	1	0	1	1	1	1	1	6
MIMAT0000692	hsa-miR-30e-5p	ENSG00000162063	CCNF	protein_coding	chr16	2506878	2506906	2506878	2506906	+	8	0	AGO1-4,AGO2	0	0	0	1	0	0	0	1
MIMAT0000692	hsa-miR-30e-5p	ENSG00000162063	CCNF	protein_coding	chr16	2508199	2508205	2508178	2508206	+	6	0	AGO1,AGO2	1	0	0	1	1	0	0	3
MIMAT0000692	hsa-miR-30e-5p	ENSG00000167977	KCTD5	protein_coding	chr16	2758236	2758242	2758215	2758243	+	5	0	AGO1-4,AGO2,AGO3	1	0	0	1	1	0	1	4
MIMAT0000692	hsa-miR-30e-5p	ENSG00000006194	ZNF263	protein_coding	chr16	3340876	3340881	3340876	3340881	+	1	0	AGO1-4	1	0	0	0	0	0	0	1
MIMAT0000692	hsa-miR-30e-5p	ENSG00000103351	CLUAP1	protein_coding	chr16	3586360	3586366	3586346	3586367	+	4	0	AGO1-4,AGO2	1	0	0	0	1	0	0	2
MIMAT0000692	hsa-miR-30e-5p	ENSG00000118900	UBN1	protein_coding	chr16	4930431	4930437	4930410	4930438	+	1	0	AGO1-4	1	0	0	1	0	0	0	2
MIMAT0000692	hsa-miR-30e-5p	ENSG00000118900	UBN1	protein_coding	chr16	4931778	4931784	4931757	4931785	+	21	0	AGO1-4,AGO2	1	0	0	1	1	0	1	4
MIMAT0000692	hsa-miR-30e-5p	ENSG00000140650	PMM2	protein_coding	chr16	8942162	8942167	8942162	8942167	+	2	0	AGO1-4	1	0	0	0	0	0	0	1
MIMAT0000692	hsa-miR-30e-5p	ENSG00000182831	C16orf72	protein_coding	chr16	9212959	9212964	9212959	9212964	+	1	0	AGO1-4	1	0	0	0	0	0	0	1
MIMAT0000692	hsa-miR-30e-5p	ENSG00000182831	C16orf72	protein_coding	chr16	9213493	9213498	9213493	9213498	+	1	0	AGO2	1	0	0	0	0	0	0	1
MIMAT0000692	hsa-miR-30e-5p	ENSG00000048471	SNX29	protein_coding	chr16	12667980	12667985	12667958	12667986	+	7	0	AGO1-4,AGO2	1	0	1	1	0	0	1	4
MIMAT0000692	hsa-miR-30e-5p	ENSG00000175595	ERCC4	protein_coding	chr16	14044986	14045004	14044986	14045004	+	1	0	AGO2	0	0	0	0	1	0	0	1
MIMAT0000692	hsa-miR-30e-5p	ENSG00000186260	MKL2	protein_coding	chr16	14359586	14359592	14359572	14359593	+	4	0	AGO1-4,AGO2	1	0	0	0	1	0	1	3
MIMAT0000692	hsa-miR-30e-5p	ENSG00000170537	TMC7	protein_coding	chr16	19073310	19073316	19073310	19073316	+	2	0	AGO2	1	0	0	0	0	0	0	1
MIMAT0000692	hsa-miR-30e-5p	ENSG00000167186	COQ7	protein_coding	chr16	19090146	19090151	19090146	19090151	+	1	0	AGO1-4	1	0	0	0	0	0	0	1
MIMAT0000692	hsa-miR-30e-5p	ENSG00000205730	ITPRIPL2	protein_coding	chr16	19129454	19129460	19129454	19129460	+	4	0	AGO1-4,AGO2	1	0	0	0	0	0	0	1
MIMAT0000692	hsa-miR-30e-5p	ENSG00000103540	CCP110	protein_coding	chr16	19562660	19562665	19562660	19562665	+	4	0	AGO1-4,AGO2	1	0	0	0	0	0	0	1
MIMAT0000692	hsa-miR-30e-5p	ENSG00000183747	ACSM2A	protein_coding	chr16	20486714	20486735	20486714	20486735	+	1	0	AGO1-4	0	0	0	0	1	0	0	1
MIMAT0000692	hsa-miR-30e-5p	ENSG00000175311	ANKS4B	protein_coding	chr16	21262998	21263004	21262977	21263005	+	2	0	AGO1-4,AGO2	1	0	0	1	1	0	1	4
MIMAT0000692	hsa-miR-30e-5p	ENSG00000175311	ANKS4B	protein_coding	chr16	21264710	21264717	21264710	21264717	+	2	0	AGO1-4,AGO2	0	0	0	0	0	0	1	1
MIMAT0000692	hsa-miR-30e-5p	ENSG00000185716	MOSMO	protein_coding	chr16	22092166	22092194	22092166	22092194	+	6	0	AGO1-4,AGO2	0	0	0	1	0	0	0	1
MIMAT0000692	hsa-miR-30e-5p	ENSG00000185716	MOSMO	protein_coding	chr16	22093094	22093122	22093094	22093122	+	3	0	AGO1-4,AGO2	0	0	0	1	0	0	0	1
MIMAT0000692	hsa-miR-30e-5p	ENSG00000185716	MOSMO	protein_coding	chr16	22094545	22094551	22094524	22094552	+	17	0	AGO1,AGO1-4,AGO2,AGO3	0	0	0	1	0	0	1	2
MIMAT0000692	hsa-miR-30e-5p	ENSG00000103319	EEF2K	protein_coding	chr16	22296376	22296381	22296376	22296381	+	7	0	AGO1-4,AGO2	1	0	0	0	0	0	0	1
MIMAT0000692	hsa-miR-30e-5p	ENSG00000103319	EEF2K	protein_coding	chr16	22299838	22299844	22299838	22299844	+	1	0	AGO1-4	0	0	0	0	0	0	1	1
MIMAT0000692	hsa-miR-30e-5p	ENSG00000122257	RBBP6	protein_coding	chr16	24584027	24584032	24584027	24584032	+	14	0	AGO1,AGO1-4,AGO2,AGO3	1	0	0	0	0	0	0	1
MIMAT0000692	hsa-miR-30e-5p	ENSG00000090905	TNRC6A	protein_coding	chr16	24801329	24801357	24801329	24801357	+	24	0	AGO1,AGO1-4,AGO2,AGO3	0	0	0	1	0	0	0	1
MIMAT0000692	hsa-miR-30e-5p	ENSG00000090905	TNRC6A	protein_coding	chr16	24801849	24801877	24801849	24801877	+	11	0	AGO1-4,AGO2	0	0	0	1	0	0	0	1
MIMAT0000692	hsa-miR-30e-5p	ENSG00000090905	TNRC6A	protein_coding	chr16	24835583	24835589	24835562	24835590	+	37	0	AGO1-4,AGO2	1	0	1	1	1	0	1	5
MIMAT0000692	hsa-miR-30e-5p	ENSG00000090905	TNRC6A	protein_coding	chr16	24835874	24835880	24835853	24835881	+	26	0	AGO1-4,AGO2	1	0	1	1	1	0	1	5
MIMAT0000692	hsa-miR-30e-5p	ENSG00000090905	TNRC6A	protein_coding	chr16	24835914	24835920	24835893	24835921	+	29	0	AGO1,AGO1-4,AGO2	1	0	1	1	1	0	1	5
MIMAT0000692	hsa-miR-30e-5p	ENSG00000090905	TNRC6A	protein_coding	chr16	24836680	24836686	24836659	24836687	+	30	0	AGO1,AGO1-4,AGO2	1	0	1	1	1	0	1	5
MIMAT0000692	hsa-miR-30e-5p	ENSG00000103522	IL21R	protein_coding	chr16	27460728	27460735	27460715	27460736	+	7	0	AGO1-4,AGO2	1	0	0	0	1	0	0	2
MIMAT0000692	hsa-miR-30e-5p	ENSG00000188322	SBK1	protein_coding	chr16	28334562	28334568	28334541	28334569	+	5	0	AGO1-4,AGO2	1	0	0	1	1	0	1	4
MIMAT0000692	hsa-miR-30e-5p	ENSG00000176953	NFATC2IP	protein_coding	chr16	28976157	28976162	28976157	28976162	+	6	0	AGO2	1	0	0	0	0	0	0	1
MIMAT0000692	hsa-miR-30e-5p	ENSG00000167371	PRRT2	protein_coding	chr16	29826090	29826096	29826069	29826097	+	1	0	AGO1-4	1	0	0	1	1	0	1	4
MIMAT0000692	hsa-miR-30e-5p	ENSG00000197302	ZNF720	protein_coding	chr16	31771027	31771029	31771002	31771055	+	9	0	AGO1-4,AGO2	0	0	1	2	1	0	0	4
MIMAT0000692	hsa-miR-30e-5p	ENSG00000197302	ZNF720	protein_coding	chr16	31771048	31771054	31771031	31771055	+	7	0	AGO1-4,AGO2	0	0	1	0	1	0	0	2
MIMAT0000692	hsa-miR-30e-5p	ENSG00000166123	GPT2	protein_coding	chr16	46963200	46963205	46963178	46963206	+	3	0	AGO1-4,AGO2	1	0	1	1	0	0	0	3
MIMAT0000692	hsa-miR-30e-5p	ENSG00000166123	GPT2	protein_coding	chr16	46964730	46964735	46964708	46964736	+	2	0	AGO2	1	0	1	1	0	0	1	4
MIMAT0000692	hsa-miR-30e-5p	ENSG00000102910	LONP2	protein_coding	chr16	48396406	48396412	48396406	48396412	+	4	0	AGO2	0	0	1	0	0	0	0	1
MIMAT0000692	hsa-miR-30e-5p	ENSG00000121274	PAPD5	protein_coding	chr16	50265250	50265256	50265229	50265257	+	18	0	AGO1-4,AGO2	1	0	0	1	1	0	1	4
MIMAT0000692	hsa-miR-30e-5p	ENSG00000177200	CHD9	protein_coding	chr16	53191418	53191446	53191418	53191446	+	2	0	AGO1-4,AGO2	0	0	0	1	0	0	0	1
MIMAT0000692	hsa-miR-30e-5p	ENSG00000177200	CHD9	protein_coding	chr16	53359416	53359421	53359394	53359422	+	19	0	AGO1-4,AGO2	1	0	1	1	0	0	1	4
MIMAT0000692	hsa-miR-30e-5p	ENSG00000177200	CHD9	protein_coding	chr16	53360692	53360697	53360670	53360698	+	7	0	AGO1-4,AGO2	1	0	1	1	0	0	0	3
MIMAT0000692	hsa-miR-30e-5p	ENSG00000087253	LPCAT2	protein_coding	chr16	55619154	55619160	55619133	55619161	+	1	0	AGO2	0	0	1	1	1	0	0	3
MIMAT0000692	hsa-miR-30e-5p	ENSG00000172840	PDP2	protein_coding	chr16	66920263	66920268	66920241	66920269	+	7	0	AGO2	1	0	1	1	0	0	1	4
MIMAT0000692	hsa-miR-30e-5p	ENSG00000067955	CBFB	protein_coding	chr16	67133266	67133271	67133244	67133272	+	11	0	AGO1-4,AGO2	1	0	0	1	1	0	0	3
MIMAT0000692	hsa-miR-30e-5p	ENSG00000067955	CBFB	protein_coding	chr16	67134422	67134428	67134401	67134429	+	11	0	AGO1,AGO2	1	0	0	1	1	0	1	4
MIMAT0000692	hsa-miR-30e-5p	ENSG00000102974	CTCF	protein_coding	chr16	67671997	67672002	67671997	67672002	+	4	0	AGO1-4,AGO2	1	0	0	0	0	0	0	1
MIMAT0000692	hsa-miR-30e-5p	ENSG00000072736	NFATC3	protein_coding	chr16	68263003	68263009	68262981	68263009	+	2	1	AGO1-4,AGO2	0	0	0	1	0	1	1	3
MIMAT0000692	hsa-miR-30e-5p	ENSG00000103064	SLC7A6	protein_coding	chr16	68332398	68332404	68332380	68332405	+	5	0	AGO1-4,AGO2	1	0	0	0	1	0	1	3
MIMAT0000692	hsa-miR-30e-5p	ENSG00000168807	SNTB2	protein_coding	chr16	69342371	69342377	69342350	69342378	+	13	1	AGO1-4,AGO2,AGO3	1	0	0	1	0	0	1	3
MIMAT0000692	hsa-miR-30e-5p	ENSG00000102908	NFAT5	protein_coding	chr16	69726551	69726579	69726551	69726579	+	3	0	AGO1-4	0	0	0	1	0	0	0	1
MIMAT0000692	hsa-miR-30e-5p	ENSG00000102908	NFAT5	protein_coding	chr16	69730615	69730621	69730594	69730622	+	3	0	AGO2	1	0	1	1	1	1	1	6
MIMAT0000692	hsa-miR-30e-5p	ENSG00000102908	NFAT5	protein_coding	chr16	69731907	69731913	69731886	69731914	+	10	0	AGO1-4,AGO2	1	0	1	1	0	0	0	3
MIMAT0000692	hsa-miR-30e-5p	ENSG00000102908	NFAT5	protein_coding	chr16	69736852	69736857	69736830	69736858	+	4	0	AGO1,AGO2	1	0	1	1	0	1	1	5
MIMAT0000692	hsa-miR-30e-5p	ENSG00000102908	NFAT5	protein_coding	chr16	69737442	69737447	69737420	69737448	+	8	0	AGO1-4,AGO2	1	0	1	1	0	1	1	5
MIMAT0000692	hsa-miR-30e-5p	ENSG00000090857	PDPR	protein_coding	chr16	70192375	70192381	70192375	70192381	+	3	0	AGO1-4,AGO2	1	0	0	0	0	0	0	1
MIMAT0000692	hsa-miR-30e-5p	ENSG00000172137	CALB2	protein_coding	chr16	71424278	71424284	71424257	71424300	+	2	0	AGO1-4	1	0	1	2	1	0	1	6
MIMAT0000692	hsa-miR-30e-5p	ENSG00000172137	CALB2	protein_coding	chr16	71424294	71424299	71424294	71424299	+	1	0	AGO1-4	1	0	1	0	0	0	0	2
MIMAT0000692	hsa-miR-30e-5p	ENSG00000103035	PSMD7	protein_coding	chr16	74340146	74340152	74340129	74340153	+	30	0	AGO1,AGO1-4,AGO2,AGO3	1	0	0	0	1	0	1	3
MIMAT0000692	hsa-miR-30e-5p	ENSG00000186187	ZNRF1	protein_coding	chr16	75141896	75141902	75141875	75141903	+	12	0	AGO1-4,AGO2	1	0	1	1	1	0	1	5
MIMAT0000692	hsa-miR-30e-5p	ENSG00000186187	ZNRF1	protein_coding	chr16	75141958	75141964	75141937	75141965	+	12	0	AGO1-4,AGO2	1	0	1	1	1	0	1	5
MIMAT0000692	hsa-miR-30e-5p	ENSG00000184517	ZFP1	protein_coding	chr16	75205413	75205419	75205392	75205420	+	7	0	AGO1,AGO1-4,AGO2	1	0	1	1	1	0	0	4
MIMAT0000692	hsa-miR-30e-5p	ENSG00000184517	ZFP1	protein_coding	chr16	75205887	75205893	75205866	75205894	+	8	0	AGO1,AGO1-4,AGO2	1	0	1	1	1	0	0	4
MIMAT0000692	hsa-miR-30e-5p	ENSG00000261609	GAN	protein_coding	chr16	81412189	81412195	81412173	81412196	+	8	0	AGO1-4,AGO2	1	0	0	0	1	0	1	3
MIMAT0000692	hsa-miR-30e-5p	ENSG00000261609	GAN	protein_coding	chr16	81414215	81414221	81414215	81414221	+	6	0	AGO1-4,AGO2	0	0	0	0	0	0	1	1
MIMAT0000692	hsa-miR-30e-5p	ENSG00000261609	GAN	protein_coding	chr16	81414413	81414419	81414413	81414419	+	6	0	AGO1,AGO1-4,AGO2	0	0	0	0	0	0	1	1
MIMAT0000692	hsa-miR-30e-5p	ENSG00000261609	GAN	protein_coding	chr16	81424014	81424020	81424014	81424020	+	3	0	AGO1-4	0	0	0	0	0	0	1	1
MIMAT0000692	hsa-miR-30e-5p	ENSG00000261609	GAN	protein_coding	chr16	81424074	81424081	81424074	81424081	+	3	0	AGO1-4	0	0	0	0	0	0	1	1
MIMAT0000692	hsa-miR-30e-5p	ENSG00000140945	CDH13	protein_coding	chr16	83828718	83828723	83828696	83828724	+	2	0	AGO1-4,AGO2	1	0	0	1	0	0	1	3
MIMAT0000692	hsa-miR-30e-5p	ENSG00000103196	CRISPLD2	protein_coding	chr16	84941092	84941097	84941092	84941097	+	1	0	AGO1-4	1	0	0	0	0	0	0	1
MIMAT0000692	hsa-miR-30e-5p	ENSG00000131143	COX4I1	protein_coding	chr16	85840597	85840602	85840597	85840602	+	14	0	AGO1,AGO1-4,AGO2	1	0	0	0	0	0	0	1
MIMAT0000692	hsa-miR-30e-5p	ENSG00000140941	MAP1LC3B	protein_coding	chr16	87438012	87438018	87437998	87438019	+	9	1	AGO1-4,AGO2	1	0	0	0	1	0	0	2
MIMAT0000692	hsa-miR-30e-5p	ENSG00000183688	RFLNB	protein_coding	chr17	289842	289847	289842	289847	-	1	0	AGO2	1	0	0	0	0	0	0	1
MIMAT0000692	hsa-miR-30e-5p	ENSG00000159842	ABR	protein_coding	chr17	907599	907605	907599	907605	-	1	0	AGO1-4	1	0	0	0	0	0	0	1
MIMAT0000692	hsa-miR-30e-5p	ENSG00000159842	ABR	protein_coding	chr17	908545	908550	908545	908550	-	3	0	AGO1-4,AGO2	1	0	0	0	0	0	0	1
MIMAT0000692	hsa-miR-30e-5p	ENSG00000197879	MYO1C	protein_coding	chr17	1368517	1368523	1368516	1368537	-	4	0	AGO1-4,AGO2	1	0	0	0	1	0	0	2
MIMAT0000692	hsa-miR-30e-5p	ENSG00000167721	TSR1	protein_coding	chr17	2226895	2226900	2226895	2226900	-	1	0	AGO1-4	1	0	0	0	0	0	0	1
MIMAT0000692	hsa-miR-30e-5p	ENSG00000070444	MNT	protein_coding	chr17	2287647	2287653	2287646	2287674	-	9	2	AGO1-4,AGO2	1	0	0	1	1	0	1	4
MIMAT0000692	hsa-miR-30e-5p	ENSG00000074755	ZZEF1	protein_coding	chr17	3907881	3907886	3907881	3907886	-	2	0	AGO1-4,AGO2	1	0	0	0	0	0	0	1
MIMAT0000692	hsa-miR-30e-5p	ENSG00000132388	UBE2G1	protein_coding	chr17	4172624	4172630	4172623	4172651	-	14	0	AGO1-4,AGO2	1	0	0	1	1	0	1	4
MIMAT0000692	hsa-miR-30e-5p	ENSG00000167840	ZNF232	protein_coding	chr17	5008988	5009009	5008988	5009009	-	1	0	AGO1-4	0	0	0	0	1	0	0	1
MIMAT0000692	hsa-miR-30e-5p	ENSG00000180626	ZNF594	protein_coding	chr17	5083183	5083190	5083182	5083210	-	1	0	AGO2	1	0	0	1	1	0	0	3
MIMAT0000692	hsa-miR-30e-5p	ENSG00000091592	NLRP1	protein_coding	chr17	5402867	5402888	5402867	5402888	-	7	0	AGO2	0	0	0	0	1	0	0	1
MIMAT0000692	hsa-miR-30e-5p	ENSG00000091622	PITPNM3	protein_coding	chr17	6354873	6354879	6354872	6354893	-	2	0	AGO1-4,AGO2	0	0	0	0	1	0	1	2
MIMAT0000692	hsa-miR-30e-5p	ENSG00000141510	TP53	protein_coding	chr17	7572635	7572640	7572635	7572640	-	3	0	AGO1-4,AGO2	1	0	0	0	0	0	0	1
MIMAT0000692	hsa-miR-30e-5p	ENSG00000161970	RPL26	protein_coding	chr17	8283200	8283228	8283200	8283228	-	18	0	AGO1-4	0	0	0	1	0	0	0	1
MIMAT0000692	hsa-miR-30e-5p	ENSG00000263809	AC135178.2	protein_coding	chr17	8283200	8283228	8283200	8283228	-	18	0	AGO1-4	0	0	0	1	0	0	0	1
MIMAT0000692	hsa-miR-30e-5p	ENSG00000133026	MYH10	protein_coding	chr17	8377592	8377598	8377591	8377619	-	10	0	AGO1-4,AGO2	1	0	0	1	1	0	0	3
MIMAT0000692	hsa-miR-30e-5p	ENSG00000175106	TVP23C	protein_coding	chr17	15441042	15441049	15441042	15441070	-	2	0	AGO2	0	0	0	1	1	0	1	3
MIMAT0000692	hsa-miR-30e-5p	ENSG00000181350	LRRC75A	protein_coding	chr17	16345416	16345421	16345416	16345421	-	1	0	AGO1-4	1	0	0	0	0	0	0	1
MIMAT0000692	hsa-miR-30e-5p	ENSG00000108551	RASD1	protein_coding	chr17	17397932	17397938	17397931	17397956	-	12	0	AGO1-4,AGO2	1	0	0	0	1	0	1	3
MIMAT0000692	hsa-miR-30e-5p	ENSG00000249459	ZNF286B	protein_coding	chr17	18562162	18562183	18562162	18562183	-	1	0	AGO2	0	0	0	0	1	0	0	1
MIMAT0000692	hsa-miR-30e-5p	ENSG00000108599	AKAP10	protein_coding	chr17	19808825	19808830	19808825	19808830	-	3	0	AGO1-4,AGO2	1	0	1	0	0	0	0	2
MIMAT0000692	hsa-miR-30e-5p	ENSG00000108599	AKAP10	protein_coding	chr17	19809299	19809305	19809298	19809326	-	10	0	AGO1-4,AGO2	1	0	1	1	1	0	1	5
MIMAT0000692	hsa-miR-30e-5p	ENSG00000108599	AKAP10	protein_coding	chr17	19844247	19844275	19844247	19844275	-	10	0	AGO1-4,AGO2	0	0	0	1	0	0	0	1
MIMAT0000692	hsa-miR-30e-5p	ENSG00000124422	USP22	protein_coding	chr17	20903009	20903015	20903008	20903036	-	17	1	AGO1,AGO1-4,AGO2	1	0	1	1	1	0	1	5
MIMAT0000692	hsa-miR-30e-5p	ENSG00000124422	USP22	protein_coding	chr17	20903090	20903096	20903089	20903117	-	21	0	AGO1-4,AGO2	1	0	1	1	1	0	0	4
MIMAT0000692	hsa-miR-30e-5p	ENSG00000124422	USP22	protein_coding	chr17	20903969	20903974	20903968	20903996	-	9	0	AGO1-4,AGO2	1	0	1	1	0	0	0	3
MIMAT0000692	hsa-miR-30e-5p	ENSG00000196535	MYO18A	protein_coding	chr17	27400573	27400579	27400572	27400593	-	4	1	AGO1-4,AGO2	1	0	0	0	1	0	0	2
MIMAT0000692	hsa-miR-30e-5p	ENSG00000221995	TIAF1	protein_coding	chr17	27400573	27400579	27400572	27400593	-	4	1	AGO1-4,AGO2	1	0	0	0	1	0	0	2
MIMAT0000692	hsa-miR-30e-5p	ENSG00000108256	NUFIP2	protein_coding	chr17	27586012	27586040	27586012	27586040	-	5	0	AGO1-4,AGO2	0	0	0	1	0	0	0	1
MIMAT0000692	hsa-miR-30e-5p	ENSG00000108256	NUFIP2	protein_coding	chr17	27589622	27589628	27589621	27589649	-	35	0	AGO1,AGO1-4,AGO2	1	0	0	1	1	0	1	4
MIMAT0000692	hsa-miR-30e-5p	ENSG00000141298	SSH2	protein_coding	chr17	27954201	27954207	27954200	27954228	-	1	2	AGO2	1	0	0	1	1	0	1	4
MIMAT0000692	hsa-miR-30e-5p	ENSG00000176390	CRLF3	protein_coding	chr17	29111081	29111087	29111080	29111101	-	1	0	AGO1-4	1	0	0	0	1	0	1	3
MIMAT0000692	hsa-miR-30e-5p	ENSG00000172171	TEFM	protein_coding	chr17	29226043	29226048	29226042	29226063	-	2	0	AGO2	1	0	0	0	1	0	0	2
MIMAT0000692	hsa-miR-30e-5p	ENSG00000092871	RFFL	protein_coding	chr17	33336696	33336702	33336695	33336723	-	3	0	AGO2	1	0	1	1	1	0	0	4
MIMAT0000692	hsa-miR-30e-5p	ENSG00000092871	RFFL	protein_coding	chr17	33336944	33336949	33336943	33336971	-	4	0	AGO1-4,AGO2	1	0	1	1	0	0	1	4
MIMAT0000692	hsa-miR-30e-5p	ENSG00000185379	RAD51D	protein_coding	chr17	33427894	33427900	33427894	33427900	-	8	0	AGO1-4,AGO2	1	0	0	0	0	0	0	1
MIMAT0000692	hsa-miR-30e-5p	ENSG00000275152	CCL16	protein_coding	chr17	34304571	34304577	34304570	34304594	-	1	0	AGO1-4	1	0	0	0	1	0	0	2
MIMAT0000692	hsa-miR-30e-5p	ENSG00000278540	ACACA	protein_coding	chr17	35442946	35442951	35442946	35442951	-	1	0	AGO1-4	1	0	0	0	0	0	0	1
MIMAT0000692	hsa-miR-30e-5p	ENSG00000276293	PIP4K2B	protein_coding	chr17	36923752	36923757	36923751	36923779	-	18	0	AGO1,AGO1-4,AGO2	1	0	0	1	1	1	1	5
MIMAT0000692	hsa-miR-30e-5p	ENSG00000273559	CWC25	protein_coding	chr17	36957922	36957927	36957922	36957927	-	4	0	AGO1-4,AGO2	1	0	0	0	0	0	0	1
MIMAT0000692	hsa-miR-30e-5p	ENSG00000108306	FBXL20	protein_coding	chr17	37410009	37410015	37410009	37410015	-	5	0	AGO1-4,AGO2	0	0	0	0	0	0	1	1
MIMAT0000692	hsa-miR-30e-5p	ENSG00000108306	FBXL20	protein_coding	chr17	37416927	37416933	37416926	37416954	-	9	0	AGO1-4,AGO2	1	0	0	1	1	0	1	4
MIMAT0000692	hsa-miR-30e-5p	ENSG00000073584	SMARCE1	protein_coding	chr17	38784624	38784630	38784623	38784644	-	14	0	AGO1,AGO1-4,AGO2	1	0	0	0	1	0	0	2
MIMAT0000692	hsa-miR-30e-5p	ENSG00000264058	AC073508.2	protein_coding	chr17	38784624	38784630	38784623	38784644	-	14	0	AGO1,AGO1-4,AGO2	1	0	0	0	1	0	0	2
MIMAT0000692	hsa-miR-30e-5p	ENSG00000183978	COA3	protein_coding	chr17	40949776	40949781	40949776	40949781	-	1	0	AGO1-4	1	0	0	0	0	0	0	1
MIMAT0000692	hsa-miR-30e-5p	ENSG00000126581	BECN1	protein_coding	chr17	40962674	40962680	40962673	40962701	-	14	0	AGO1,AGO1-4,AGO2,AGO3	1	0	1	1	1	0	1	5
MIMAT0000692	hsa-miR-30e-5p	ENSG00000108828	VAT1	protein_coding	chr17	41166917	41166923	41166916	41166944	-	5	0	AGO1-4,AGO2	1	0	0	1	1	0	1	4
MIMAT0000692	hsa-miR-30e-5p	ENSG00000180329	CCDC43	protein_coding	chr17	42756104	42756110	42756103	42756124	-	16	0	AGO1,AGO1-4,AGO2,AGO3	1	0	0	0	1	0	1	3
MIMAT0000692	hsa-miR-30e-5p	ENSG00000131094	C1QL1	protein_coding	chr17	43037280	43037286	43037279	43037299	-	1	0	AGO2	1	0	0	0	1	0	0	2
MIMAT0000692	hsa-miR-30e-5p	ENSG00000108468	CBX1	protein_coding	chr17	46147806	46147811	46147806	46147811	-	8	0	AGO1-4,AGO2	1	0	0	0	0	0	0	1
MIMAT0000692	hsa-miR-30e-5p	ENSG00000120068	HOXB8	protein_coding	chr17	46689722	46689727	46689721	46689749	-	4	0	AGO2	1	0	1	1	0	0	1	4
MIMAT0000692	hsa-miR-30e-5p	ENSG00000120068	HOXB8	protein_coding	chr17	46689859	46689864	46689858	46689886	-	3	0	AGO2	1	0	1	1	0	0	0	3
MIMAT0000692	hsa-miR-30e-5p	ENSG00000008294	SPAG9	protein_coding	chr17	49043343	49043348	49043343	49043348	-	5	0	AGO1-4	1	0	1	0	0	0	0	2
MIMAT0000692	hsa-miR-30e-5p	ENSG00000008294	SPAG9	protein_coding	chr17	49043390	49043396	49043389	49043417	-	9	2	AGO1-4,AGO2	1	0	1	1	1	0	0	4
MIMAT0000692	hsa-miR-30e-5p	ENSG00000011258	MBTD1	protein_coding	chr17	49256307	49256312	49256307	49256312	-	1	0	AGO1	1	0	0	0	0	0	0	1
MIMAT0000692	hsa-miR-30e-5p	ENSG00000011258	MBTD1	protein_coding	chr17	49256646	49256651	49256646	49256651	-	1	0	AGO2	1	0	0	0	0	0	0	1
MIMAT0000692	hsa-miR-30e-5p	ENSG00000108960	MMD	protein_coding	chr17	53470958	53470963	53470958	53470963	-	5	0	AGO1-4,AGO2	1	0	0	0	0	0	0	1
MIMAT0000692	hsa-miR-30e-5p	ENSG00000108960	MMD	protein_coding	chr17	53471435	53471441	53471434	53471462	-	8	0	AGO1-4,AGO2	1	0	0	1	1	0	1	4
MIMAT0000692	hsa-miR-30e-5p	ENSG00000213246	SUPT4H1	protein_coding	chr17	56422618	56422624	56422617	56422638	-	8	0	AGO1-4,AGO2	1	0	0	0	1	0	0	2
MIMAT0000692	hsa-miR-30e-5p	ENSG00000108395	TRIM37	protein_coding	chr17	57075614	57075619	57075613	57075641	-	21	0	AGO1-4,AGO2	1	0	0	1	0	0	0	2
MIMAT0000692	hsa-miR-30e-5p	ENSG00000108395	TRIM37	protein_coding	chr17	57109370	57109398	57109370	57109398	-	7	0	AGO1-4,AGO2	0	0	0	1	0	0	0	1
MIMAT0000692	hsa-miR-30e-5p	ENSG00000108395	TRIM37	protein_coding	chr17	57139930	57139958	57139930	57139958	-	7	0	AGO1-4	0	0	0	1	0	0	0	1
MIMAT0000692	hsa-miR-30e-5p	ENSG00000108395	TRIM37	protein_coding	chr17	57139978	57140006	57139978	57140006	-	9	0	AGO1-4,AGO2	0	0	0	1	0	0	0	1
MIMAT0000692	hsa-miR-30e-5p	ENSG00000062725	APPBP2	protein_coding	chr17	58523156	58523161	58523156	58523161	-	3	0	AGO1-4	1	0	0	0	0	0	0	1
MIMAT0000692	hsa-miR-30e-5p	ENSG00000108506	INTS2	protein_coding	chr17	59944190	59944196	59944189	59944211	-	8	0	AGO1-4,AGO2	1	0	0	0	1	0	1	3
MIMAT0000692	hsa-miR-30e-5p	ENSG00000008283	CYB561	protein_coding	chr17	61509937	61509943	61509936	61509964	-	8	0	AGO1-4	1	0	0	1	1	0	1	4
MIMAT0000692	hsa-miR-30e-5p	ENSG00000108604	SMARCD2	protein_coding	chr17	61909976	61909982	61909975	61910003	-	18	0	AGO1-4,AGO2	1	0	0	1	1	0	1	4
MIMAT0000692	hsa-miR-30e-5p	ENSG00000108654	DDX5	protein_coding	chr17	62496280	62496308	62496280	62496308	-	43	1	AGO1,AGO1-4,AGO2,AGO3,AGO4	0	0	0	1	0	0	0	1
MIMAT0000692	hsa-miR-30e-5p	ENSG00000120063	GNA13	protein_coding	chr17	63008427	63008432	63008426	63008454	-	1	0	AGO2	1	0	0	1	0	0	0	2
MIMAT0000692	hsa-miR-30e-5p	ENSG00000120063	GNA13	protein_coding	chr17	63009677	63009683	63009676	63009704	-	4	0	AGO1-4,AGO2	1	0	0	1	0	0	0	2
MIMAT0000692	hsa-miR-30e-5p	ENSG00000120063	GNA13	protein_coding	chr17	63009755	63009760	63009754	63009782	-	3	0	AGO1-4,AGO2	1	0	0	1	0	1	1	4
MIMAT0000692	hsa-miR-30e-5p	ENSG00000120063	GNA13	protein_coding	chr17	63010293	63010298	63010292	63010320	-	14	0	AGO1,AGO1-4,AGO2,AGO3	1	0	0	1	0	1	1	4
MIMAT0000692	hsa-miR-30e-5p	ENSG00000198265	HELZ	protein_coding	chr17	65073097	65073104	65073096	65073124	-	1	0	AGO2	1	0	0	1	0	0	0	2
MIMAT0000692	hsa-miR-30e-5p	ENSG00000198265	HELZ	protein_coding	chr17	65073377	65073383	65073376	65073404	-	7	0	AGO1-4,AGO2	1	0	0	1	1	0	1	4
MIMAT0000692	hsa-miR-30e-5p	ENSG00000133195	SLC39A11	protein_coding	chr17	70642372	70642377	70642371	70642377	-	2	0	AGO2	1	0	0	0	0	0	1	2
MIMAT0000692	hsa-miR-30e-5p	ENSG00000133193	FAM104A	protein_coding	chr17	71205512	71205518	71205511	71205539	-	22	0	AGO1,AGO1-4,AGO2	1	0	0	1	1	0	1	4
MIMAT0000692	hsa-miR-30e-5p	ENSG00000189159	JPT1	protein_coding	chr17	73131867	73131872	73131867	73131872	-	7	0	AGO1-4,AGO2	1	0	0	0	0	0	0	1
MIMAT0000692	hsa-miR-30e-5p	ENSG00000141576	RNF157	protein_coding	chr17	74138561	74138568	74138561	74138589	-	11	0	AGO1-4,AGO2	0	0	0	1	1	0	1	3
MIMAT0000692	hsa-miR-30e-5p	ENSG00000175931	UBE2O	protein_coding	chr17	74386040	74386045	74386039	74386045	-	5	0	AGO1-4,AGO2	1	0	0	0	0	0	1	2
MIMAT0000692	hsa-miR-30e-5p	ENSG00000184557	SOCS3	protein_coding	chr17	76353068	76353074	76353067	76353095	-	18	0	AGO1-4,AGO2	1	0	1	1	1	0	1	5
MIMAT0000692	hsa-miR-30e-5p	ENSG00000108669	CYTH1	protein_coding	chr17	76671849	76671855	76671849	76671855	-	5	0	AGO1-4,AGO2	1	0	0	0	0	0	0	1
MIMAT0000692	hsa-miR-30e-5p	ENSG00000035862	TIMP2	protein_coding	chr17	76849334	76849339	76849333	76849354	-	11	0	AGO1-4,AGO2	1	0	0	0	1	0	1	3
MIMAT0000692	hsa-miR-30e-5p	ENSG00000141570	CBX8	protein_coding	chr17	77767589	77767596	77767589	77767617	-	14	0	AGO1,AGO1-4,AGO2,AGO3	0	0	0	1	0	0	1	2
MIMAT0000692	hsa-miR-30e-5p	ENSG00000167302	TEPSIN	protein_coding	chr17	79202082	79202088	79202081	79202109	-	6	0	AGO1,AGO2	1	0	1	1	1	0	1	5
MIMAT0000692	hsa-miR-30e-5p	ENSG00000197063	MAFG	protein_coding	chr17	79879794	79879800	79879793	79879821	-	8	0	AGO1-4,AGO2	1	0	0	1	0	0	1	3
MIMAT0000692	hsa-miR-30e-5p	ENSG00000167695	FAM57A	protein_coding	chr17	645648	645666	645648	645666	+	1	0	AGO2	0	0	0	0	1	0	0	1
MIMAT0000692	hsa-miR-30e-5p	ENSG00000167711	SERPINF2	protein_coding	chr17	1658161	1658167	1658147	1658168	+	2	0	AGO1-4,AGO2	1	0	0	0	1	0	1	3
MIMAT0000692	hsa-miR-30e-5p	ENSG00000180787	ZFP3	protein_coding	chr17	4998010	4998016	4997995	4998017	+	4	0	AGO1-4,AGO2	1	0	0	0	1	0	0	2
MIMAT0000692	hsa-miR-30e-5p	ENSG00000180787	ZFP3	protein_coding	chr17	4998038	4998043	4998038	4998043	+	3	0	AGO1-4	1	0	0	0	0	0	0	1
MIMAT0000692	hsa-miR-30e-5p	ENSG00000129204	USP6	protein_coding	chr17	5076592	5076597	5076592	5076597	+	1	0	AGO1-4	1	0	0	0	0	0	0	1
MIMAT0000692	hsa-miR-30e-5p	ENSG00000167842	MIS12	protein_coding	chr17	5394059	5394065	5394038	5394066	+	7	0	AGO1,AGO1-4,AGO2	1	0	0	1	1	0	0	3
MIMAT0000692	hsa-miR-30e-5p	ENSG00000132510	KDM6B	protein_coding	chr17	7757983	7757988	7757961	7757989	+	10	0	AGO1-4,AGO2	1	0	0	1	0	1	0	3
MIMAT0000692	hsa-miR-30e-5p	ENSG00000166579	NDEL1	protein_coding	chr17	8371251	8371257	8371230	8371258	+	34	0	AGO1,AGO1-4,AGO2,AGO3,AGO4	1	0	0	1	1	0	1	4
MIMAT0000692	hsa-miR-30e-5p	ENSG00000187607	ZNF286A	protein_coding	chr17	15623660	15623681	15623660	15623681	+	2	0	AGO2	0	0	0	0	1	0	0	1
MIMAT0000692	hsa-miR-30e-5p	ENSG00000266302	AC098850.3	protein_coding	chr17	16706925	16706946	16706925	16706946	+	1	0	AGO2	0	0	0	0	1	0	0	1
MIMAT0000692	hsa-miR-30e-5p	ENSG00000141034	GID4	protein_coding	chr17	17969903	17969908	17969903	17969908	+	3	0	AGO1,AGO2	1	0	0	0	0	0	0	1
MIMAT0000692	hsa-miR-30e-5p	ENSG00000141034	GID4	protein_coding	chr17	17971007	17971012	17971007	17971013	+	11	0	AGO1-4,AGO2	1	0	0	0	0	0	1	2
MIMAT0000692	hsa-miR-30e-5p	ENSG00000171928	TVP23B	protein_coding	chr17	18709272	18709278	18709251	18709279	+	2	0	AGO2	1	0	0	1	1	0	1	4
MIMAT0000692	hsa-miR-30e-5p	ENSG00000072134	EPN2	protein_coding	chr17	19238742	19238748	19238728	19238749	+	2	0	AGO1-4	1	0	0	0	1	0	1	3
MIMAT0000692	hsa-miR-30e-5p	ENSG00000184185	KCNJ12	protein_coding	chr17	21320365	21320393	21320365	21320393	+	1	0	AGO2	0	0	0	1	0	0	0	1
MIMAT0000692	hsa-miR-30e-5p	ENSG00000109046	WSB1	protein_coding	chr17	25640347	25640352	25640347	25640352	+	7	0	AGO1-4,AGO2	1	0	0	0	0	0	0	1
MIMAT0000692	hsa-miR-30e-5p	ENSG00000141068	KSR1	protein_coding	chr17	25949794	25949822	25949794	25949822	+	1	0	AGO2	0	0	0	1	0	0	0	1
MIMAT0000692	hsa-miR-30e-5p	ENSG00000141068	KSR1	protein_coding	chr17	25950648	25950654	25950627	25950655	+	3	0	AGO1-4,AGO2	1	0	1	1	1	0	1	5
MIMAT0000692	hsa-miR-30e-5p	ENSG00000266728	AC015688.5	protein_coding	chr17	25950648	25950654	25950627	25950655	+	3	0	AGO1-4,AGO2	1	0	1	1	1	0	1	5
MIMAT0000692	hsa-miR-30e-5p	ENSG00000087095	NLK	protein_coding	chr17	26522806	26522812	26522792	26522813	+	21	0	AGO1-4,AGO2	1	0	0	0	1	0	1	3
MIMAT0000692	hsa-miR-30e-5p	ENSG00000109084	TMEM97	protein_coding	chr17	26655421	26655426	26655421	26655426	+	1	0	AGO2	1	0	0	0	0	0	0	1
MIMAT0000692	hsa-miR-30e-5p	ENSG00000160551	TAOK1	protein_coding	chr17	27870195	27870201	27870174	27870202	+	20	0	AGO1,AGO1-4,AGO2,AGO3	1	0	1	1	1	0	1	5
MIMAT0000692	hsa-miR-30e-5p	ENSG00000160551	TAOK1	protein_coding	chr17	27871195	27871201	27871174	27871202	+	12	0	AGO1-4,AGO2	1	0	1	1	1	0	1	5
MIMAT0000692	hsa-miR-30e-5p	ENSG00000160551	TAOK1	protein_coding	chr17	27874698	27874704	27874677	27874705	+	1	0	AGO1-4	0	0	1	1	0	0	0	2
MIMAT0000692	hsa-miR-30e-5p	ENSG00000160551	TAOK1	protein_coding	chr17	27876031	27876037	27876010	27876038	+	15	0	AGO1-4,AGO2	0	0	1	1	0	0	1	3
MIMAT0000692	hsa-miR-30e-5p	ENSG00000108582	CPD	protein_coding	chr17	28792156	28792163	28792146	28792164	+	6	0	AGO1-4,AGO2	1	0	0	0	1	0	0	2
MIMAT0000692	hsa-miR-30e-5p	ENSG00000108582	CPD	protein_coding	chr17	28793351	28793356	28793351	28793356	+	3	0	AGO1-4	1	0	0	0	0	0	0	1
MIMAT0000692	hsa-miR-30e-5p	ENSG00000176208	ATAD5	protein_coding	chr17	29222760	29222767	29222739	29222767	+	1	0	AGO1-4	0	0	0	1	0	0	1	2
MIMAT0000692	hsa-miR-30e-5p	ENSG00000181481	RNF135	protein_coding	chr17	29326587	29326593	29326573	29326594	+	6	0	AGO1-4,AGO2	1	0	0	0	1	0	0	2
MIMAT0000692	hsa-miR-30e-5p	ENSG00000196712	NF1	protein_coding	chr17	29702507	29702512	29702507	29702512	+	3	0	AGO1-4	1	0	1	0	0	0	0	2
MIMAT0000692	hsa-miR-30e-5p	ENSG00000196712	NF1	protein_coding	chr17	29702875	29702881	29702861	29702882	+	4	0	AGO1-4,AGO2	1	0	1	0	1	0	1	4
MIMAT0000692	hsa-miR-30e-5p	ENSG00000196712	NF1	protein_coding	chr17	29702948	29702953	29702948	29702953	+	2	0	AGO2	1	0	1	0	0	0	0	2
MIMAT0000692	hsa-miR-30e-5p	ENSG00000196712	NF1	protein_coding	chr17	29703339	29703344	29703339	29703344	+	1	0	AGO1-4	1	0	1	0	0	0	0	2
MIMAT0000692	hsa-miR-30e-5p	ENSG00000196712	NF1	protein_coding	chr17	29703375	29703380	29703375	29703380	+	3	0	AGO1-4,AGO2	1	0	1	0	0	0	0	2
MIMAT0000692	hsa-miR-30e-5p	ENSG00000273706	LHX1	protein_coding	chr17	35301273	35301279	35301252	35301280	+	1	0	AGO1-4	0	0	1	1	0	1	1	4
MIMAT0000692	hsa-miR-30e-5p	ENSG00000167258	CDK12	protein_coding	chr17	37688196	37688224	37688196	37688224	+	1	0	AGO1	0	0	0	1	0	0	0	1
MIMAT0000692	hsa-miR-30e-5p	ENSG00000167258	CDK12	protein_coding	chr17	37688691	37688697	37688670	37688698	+	9	0	AGO1,AGO2	1	0	1	1	1	0	1	5
MIMAT0000692	hsa-miR-30e-5p	ENSG00000131748	STARD3	protein_coding	chr17	37819384	37819391	37819370	37819392	+	8	0	AGO1-4,AGO2	1	0	0	0	1	0	0	2
MIMAT0000692	hsa-miR-30e-5p	ENSG00000131467	PSME3	protein_coding	chr17	40993757	40993763	40993740	40993764	+	7	2	AGO1,AGO1-4,AGO2	1	0	0	0	1	0	1	3
MIMAT0000692	hsa-miR-30e-5p	ENSG00000188554	NBR1	protein_coding	chr17	41363233	41363239	41363216	41363240	+	3	0	AGO1-4,AGO2	1	0	0	0	1	0	0	2
MIMAT0000692	hsa-miR-30e-5p	ENSG00000259207	ITGB3	protein_coding	chr17	45387635	45387641	45387614	45387642	+	3	0	AGO1-4,AGO2	1	0	0	1	1	0	1	4
MIMAT0000692	hsa-miR-30e-5p	ENSG00000141279	NPEPPS	protein_coding	chr17	45697144	45697171	45697144	45697171	+	2	0	AGO1-4	0	0	0	0	1	0	0	1
MIMAT0000692	hsa-miR-30e-5p	ENSG00000108424	KPNB1	protein_coding	chr17	45760430	45760436	45760414	45760437	+	8	0	AGO1-4,AGO2,AGO3	1	0	0	0	1	0	0	2
MIMAT0000692	hsa-miR-30e-5p	ENSG00000073861	TBX21	protein_coding	chr17	45822970	45822975	45822970	45822975	+	1	0	AGO1-4	1	0	0	0	0	0	0	1
MIMAT0000692	hsa-miR-30e-5p	ENSG00000136444	RSAD1	protein_coding	chr17	48562487	48562493	48562471	48562494	+	1	0	AGO1-4	1	0	0	0	1	0	0	2
MIMAT0000692	hsa-miR-30e-5p	ENSG00000153933	DGKE	protein_coding	chr17	54941214	54941220	54941202	54941221	+	5	0	AGO1-4,AGO2	0	0	0	0	1	0	1	2
MIMAT0000692	hsa-miR-30e-5p	ENSG00000153944	MSI2	protein_coding	chr17	55760858	55760886	55760858	55760886	+	9	0	AGO1-4,AGO2	0	0	0	1	0	0	0	1
MIMAT0000692	hsa-miR-30e-5p	ENSG00000153944	MSI2	protein_coding	chr17	55760940	55760947	55760919	55760947	+	8	0	AGO1-4,AGO2	0	0	0	1	0	0	1	2
MIMAT0000692	hsa-miR-30e-5p	ENSG00000108384	RAD51C	protein_coding	chr17	56770254	56770277	56770254	56770277	+	4	0	AGO1-4	0	0	0	0	1	0	0	1
MIMAT0000692	hsa-miR-30e-5p	ENSG00000175175	PPM1E	protein_coding	chr17	57061724	57061730	57061712	57061731	+	1	0	AGO1-4	1	0	0	0	1	0	1	3
MIMAT0000692	hsa-miR-30e-5p	ENSG00000167447	SMG8	protein_coding	chr17	57292439	57292445	57292428	57292446	+	5	0	AGO1,AGO1-4,AGO2	1	0	0	0	1	0	0	2
MIMAT0000692	hsa-miR-30e-5p	ENSG00000265303	AC099850.2	protein_coding	chr17	57292439	57292445	57292428	57292446	+	5	0	AGO1,AGO1-4,AGO2	1	0	0	0	1	0	0	2
MIMAT0000692	hsa-miR-30e-5p	ENSG00000175155	YPEL2	protein_coding	chr17	57478177	57478182	57478155	57478183	+	3	0	AGO2	1	0	0	1	0	0	1	3
MIMAT0000692	hsa-miR-30e-5p	ENSG00000175155	YPEL2	protein_coding	chr17	57478866	57478872	57478845	57478873	+	2	0	AGO1-4	1	0	0	1	1	0	1	4
MIMAT0000692	hsa-miR-30e-5p	ENSG00000108406	DHX40	protein_coding	chr17	57650486	57650514	57650486	57650514	+	7	1	AGO1,AGO1-4	0	0	0	1	0	0	0	1
MIMAT0000692	hsa-miR-30e-5p	ENSG00000108406	DHX40	protein_coding	chr17	57685522	57685528	57685501	57685529	+	15	0	AGO1,AGO1-4,AGO2	1	0	0	1	1	0	1	4
MIMAT0000692	hsa-miR-30e-5p	ENSG00000141367	CLTC	protein_coding	chr17	57771963	57771969	57771947	57771970	+	19	6	AGO1,AGO1-4,AGO2	1	0	0	0	1	0	0	2
MIMAT0000692	hsa-miR-30e-5p	ENSG00000108443	RPS6KB1	protein_coding	chr17	58026273	58026280	58026260	58026281	+	4	0	AGO1-4,AGO2	1	0	0	0	1	0	0	2
MIMAT0000692	hsa-miR-30e-5p	ENSG00000108443	RPS6KB1	protein_coding	chr17	58026889	58026894	58026889	58026894	+	2	0	AGO1-4,AGO2	1	0	0	0	0	0	0	1
MIMAT0000692	hsa-miR-30e-5p	ENSG00000170921	TANC2	protein_coding	chr17	61502925	61502930	61502925	61502930	+	2	0	AGO1,AGO1-4	1	0	0	0	0	0	0	1
MIMAT0000692	hsa-miR-30e-5p	ENSG00000136485	DCAF7	protein_coding	chr17	61667312	61667318	61667312	61667318	+	5	0	AGO1,AGO1-4,AGO2	1	0	0	0	0	0	0	1
MIMAT0000692	hsa-miR-30e-5p	ENSG00000136485	DCAF7	protein_coding	chr17	61667568	61667573	61667568	61667573	+	3	0	AGO1-4	1	0	0	0	0	0	0	1
MIMAT0000692	hsa-miR-30e-5p	ENSG00000136485	DCAF7	protein_coding	chr17	61670368	61670373	61670368	61670373	+	4	0	AGO1,AGO1-4,AGO2	1	0	0	0	0	0	0	1
MIMAT0000692	hsa-miR-30e-5p	ENSG00000154229	PRKCA	protein_coding	chr17	64801658	64801663	64801658	64801663	+	2	0	AGO2	1	0	0	0	0	0	0	1
MIMAT0000692	hsa-miR-30e-5p	ENSG00000171634	BPTF	protein_coding	chr17	65977824	65977844	65977824	65977844	+	4	0	AGO1-4,AGO2	0	0	0	0	1	0	0	1
MIMAT0000692	hsa-miR-30e-5p	ENSG00000108946	PRKAR1A	protein_coding	chr17	66528558	66528564	66528544	66528565	+	9	0	AGO1,AGO1-4,AGO2	1	0	0	0	1	0	1	3
MIMAT0000692	hsa-miR-30e-5p	ENSG00000125398	SOX9	protein_coding	chr17	70122527	70122533	70122506	70122534	+	5	0	AGO1-4,AGO2	1	0	0	1	1	0	1	4
MIMAT0000692	hsa-miR-30e-5p	ENSG00000180616	SSTR2	protein_coding	chr17	71166978	71166984	71166964	71166985	+	1	0	AGO2	1	0	0	0	1	0	0	2
MIMAT0000692	hsa-miR-30e-5p	ENSG00000125449	ARMC7	protein_coding	chr17	73110393	73110413	73110393	73110413	+	2	0	AGO1-4,AGO2	0	0	0	0	1	0	0	1
MIMAT0000692	hsa-miR-30e-5p	ENSG00000161526	SAP30BP	protein_coding	chr17	73703375	73703381	73703363	73703382	+	1	0	AGO2	1	0	0	0	1	0	1	3
MIMAT0000692	hsa-miR-30e-5p	ENSG00000092931	MFSD11	protein_coding	chr17	74774593	74774598	74774571	74774599	+	4	0	AGO2	1	0	0	1	0	0	1	3
MIMAT0000692	hsa-miR-30e-5p	ENSG00000184640	2020-09-09	protein_coding	chr17	75496349	75496354	75496349	75496354	+	3	0	AGO1-4,AGO2	1	0	0	0	0	0	0	1
MIMAT0000692	hsa-miR-30e-5p	ENSG00000078687	TNRC6C	protein_coding	chr17	76101973	76101979	76101952	76101980	+	28	0	AGO1,AGO1-4,AGO2,AGO3	0	0	0	1	1	0	1	3
MIMAT0000692	hsa-miR-30e-5p	ENSG00000078687	TNRC6C	protein_coding	chr17	76102275	76102282	76102254	76102282	+	12	0	AGO1-4,AGO2	0	0	0	1	0	0	1	2
MIMAT0000692	hsa-miR-30e-5p	ENSG00000167895	TMC8	protein_coding	chr17	76137533	76137555	76137533	76137555	+	1	0	AGO1-4	0	0	0	0	1	0	0	1
MIMAT0000692	hsa-miR-30e-5p	ENSG00000173894	CBX2	protein_coding	chr17	77761166	77761172	77761145	77761173	+	9	0	AGO1-4,AGO2	1	0	1	1	1	0	0	4
MIMAT0000692	hsa-miR-30e-5p	ENSG00000173894	CBX2	protein_coding	chr17	77761331	77761337	77761310	77761338	+	21	0	AGO1,AGO1-4,AGO2	1	0	1	1	1	0	1	5
MIMAT0000692	hsa-miR-30e-5p	ENSG00000141527	CARD14	protein_coding	chr17	78182716	78182718	78182713	78182737	+	1	0	AGO2	1	0	0	0	1	0	0	2
MIMAT0000692	hsa-miR-30e-5p	ENSG00000141527	CARD14	protein_coding	chr17	78182730	78182736	78182730	78182736	+	1	0	AGO2	1	0	0	0	0	0	0	1
MIMAT0000692	hsa-miR-30e-5p	ENSG00000181045	SLC26A11	protein_coding	chr17	78227181	78227188	78227161	78227189	+	4	0	AGO1-4,AGO2	1	0	0	1	1	0	0	3
MIMAT0000692	hsa-miR-30e-5p	ENSG00000173821	RNF213	protein_coding	chr17	78367586	78367592	78367565	78367593	+	20	0	AGO1-4,AGO2	1	0	0	1	1	0	0	3
MIMAT0000692	hsa-miR-30e-5p	ENSG00000175866	BAIAP2	protein_coding	chr17	79083000	79083006	79083000	79083006	+	1	0	AGO2	1	0	0	0	0	0	0	1
MIMAT0000692	hsa-miR-30e-5p	ENSG00000185298	CCDC137	protein_coding	chr17	79640911	79640916	79640911	79640916	+	15	0	AGO1-4,AGO2	1	0	0	0	0	0	0	1
MIMAT0000692	hsa-miR-30e-5p	ENSG00000176105	YES1	protein_coding	chr18	722301	722307	722300	722321	-	3	0	AGO1-4,AGO2	1	0	0	0	1	0	1	3
MIMAT0000692	hsa-miR-30e-5p	ENSG00000170579	DLGAP1	protein_coding	chr18	3502344	3502369	3502344	3502369	-	1	0	AGO2	0	0	0	0	1	0	0	1
MIMAT0000692	hsa-miR-30e-5p	ENSG00000082397	EPB41L3	protein_coding	chr18	5392717	5392722	5392716	5392737	-	1	0	AGO1-4	1	0	0	0	1	0	0	2
MIMAT0000692	hsa-miR-30e-5p	ENSG00000101680	LAMA1	protein_coding	chr18	6941942	6941948	6941941	6941962	-	2	0	AGO2	1	0	0	0	1	0	0	2
MIMAT0000692	hsa-miR-30e-5p	ENSG00000154864	PIEZO2	protein_coding	chr18	10670547	10670553	10670547	10670553	-	1	0	AGO2	0	0	0	0	0	0	1	1
MIMAT0000692	hsa-miR-30e-5p	ENSG00000134278	SPIRE1	protein_coding	chr18	12448030	12448036	12448029	12448048	-	4	0	AGO2	1	0	0	0	1	0	0	2
MIMAT0000692	hsa-miR-30e-5p	ENSG00000101624	CEP76	protein_coding	chr18	12673100	12673106	12673099	12673120	-	1	0	AGO1-4	1	0	1	0	1	0	1	4
MIMAT0000692	hsa-miR-30e-5p	ENSG00000101624	CEP76	protein_coding	chr18	12699087	12699097	12699076	12699115	-	8	0	AGO1,AGO1-4,AGO2	0	0	0	2	2	0	0	4
MIMAT0000692	hsa-miR-30e-5p	ENSG00000175354	PTPN2	protein_coding	chr18	12785689	12785695	12785688	12785708	-	6	0	AGO1-4,AGO2	1	0	1	0	1	0	1	4
MIMAT0000692	hsa-miR-30e-5p	ENSG00000175354	PTPN2	protein_coding	chr18	12793323	12793328	12793323	12793328	-	2	0	AGO2	1	0	0	0	0	0	0	1
MIMAT0000692	hsa-miR-30e-5p	ENSG00000177150	FAM210A	protein_coding	chr18	13663435	13663441	13663434	13663456	-	2	0	AGO1-4	1	0	0	0	1	0	0	2
MIMAT0000692	hsa-miR-30e-5p	ENSG00000141446	ESCO1	protein_coding	chr18	19110047	19110053	19110046	19110074	-	1	0	AGO1-4	1	0	0	1	1	0	1	4
MIMAT0000692	hsa-miR-30e-5p	ENSG00000141458	NPC1	protein_coding	chr18	21112114	21112119	21112114	21112119	-	2	0	AGO1-4,AGO2	1	0	0	0	0	0	0	1
MIMAT0000692	hsa-miR-30e-5p	ENSG00000141447	OSBPL1A	protein_coding	chr18	21742449	21742454	21742448	21742469	-	1	0	AGO2	1	0	0	0	1	0	0	2
MIMAT0000692	hsa-miR-30e-5p	ENSG00000198795	ZNF521	protein_coding	chr18	22641894	22641915	22641894	22641922	-	1	0	AGO1-4	0	0	0	1	1	0	0	2
MIMAT0000692	hsa-miR-30e-5p	ENSG00000198795	ZNF521	protein_coding	chr18	22641957	22641963	22641956	22641984	-	5	0	AGO1-4,AGO2	1	0	1	1	1	0	1	5
MIMAT0000692	hsa-miR-30e-5p	ENSG00000118276	B4GALT6	protein_coding	chr18	29203851	29203857	29203850	29203878	-	1	0	AGO1-4	1	0	1	1	1	0	0	4
MIMAT0000692	hsa-miR-30e-5p	ENSG00000118276	B4GALT6	protein_coding	chr18	29205442	29205448	29205441	29205469	-	5	0	AGO2	1	0	1	1	1	0	1	5
MIMAT0000692	hsa-miR-30e-5p	ENSG00000153339	TRAPPC8	protein_coding	chr18	29454445	29454473	29454445	29454473	-	1	0	AGO2	0	0	0	1	0	0	0	1
MIMAT0000692	hsa-miR-30e-5p	ENSG00000153339	TRAPPC8	protein_coding	chr18	29454622	29454650	29454622	29454650	-	2	0	AGO1-4,AGO2	0	0	0	1	0	0	0	1
MIMAT0000692	hsa-miR-30e-5p	ENSG00000141441	GAREM1	protein_coding	chr18	29843848	29843855	29843848	29843876	-	1	0	AGO2	0	0	0	1	0	0	1	2
MIMAT0000692	hsa-miR-30e-5p	ENSG00000141441	GAREM1	protein_coding	chr18	29845716	29845744	29845716	29845744	-	1	0	AGO1	0	0	0	1	0	0	0	1
MIMAT0000692	hsa-miR-30e-5p	ENSG00000141425	RPRD1A	protein_coding	chr18	33569861	33569867	33569860	33569888	-	4	0	AGO1-4,AGO2	1	0	1	1	1	0	0	4
MIMAT0000692	hsa-miR-30e-5p	ENSG00000141425	RPRD1A	protein_coding	chr18	33572955	33572961	33572954	33572982	-	3	0	AGO1-4,AGO2	1	0	1	1	1	0	1	5
MIMAT0000692	hsa-miR-30e-5p	ENSG00000141425	RPRD1A	protein_coding	chr18	33613718	33613746	33613718	33613746	-	3	0	AGO1-4,AGO2	0	0	0	1	0	0	0	1
MIMAT0000692	hsa-miR-30e-5p	ENSG00000141424	SLC39A6	protein_coding	chr18	33688716	33688721	33688715	33688743	-	10	0	AGO1-4,AGO2	1	0	0	1	0	0	0	2
MIMAT0000692	hsa-miR-30e-5p	ENSG00000101489	CELF4	protein_coding	chr18	34823660	34823666	34823660	34823681	-	1	0	AGO2	0	0	0	0	1	1	1	3
MIMAT0000692	hsa-miR-30e-5p	ENSG00000152223	EPG5	protein_coding	chr18	43428553	43428581	43428553	43428581	-	1	0	AGO1-4	0	0	0	1	0	0	0	1
MIMAT0000692	hsa-miR-30e-5p	ENSG00000152223	EPG5	protein_coding	chr18	43432388	43432394	43432387	43432415	-	26	0	AGO1-4,AGO2	1	0	0	1	1	0	1	4
MIMAT0000692	hsa-miR-30e-5p	ENSG00000152229	PSTPIP2	protein_coding	chr18	43565222	43565227	43565221	43565249	-	1	0	AGO2	1	0	0	1	0	1	0	3
MIMAT0000692	hsa-miR-30e-5p	ENSG00000175387	SMAD2	protein_coding	chr18	45359473	45359479	45359472	45359500	-	5	0	AGO1-4,AGO2	1	0	0	1	0	0	1	3
MIMAT0000692	hsa-miR-30e-5p	ENSG00000175387	SMAD2	protein_coding	chr18	45365493	45365498	45365492	45365520	-	2	0	AGO1-4,AGO2	1	0	0	1	0	0	0	2
MIMAT0000692	hsa-miR-30e-5p	ENSG00000175387	SMAD2	protein_coding	chr18	45368112	45368118	45368111	45368139	-	7	0	AGO1-4,AGO2	1	0	0	1	0	0	1	3
MIMAT0000692	hsa-miR-30e-5p	ENSG00000167306	MYO5B	protein_coding	chr18	47350190	47350196	47350190	47350196	-	2	0	AGO1-4,AGO2	1	0	0	0	0	0	0	1
MIMAT0000692	hsa-miR-30e-5p	ENSG00000176624	MEX3C	protein_coding	chr18	48701430	48701435	48701429	48701450	-	8	0	AGO1,AGO2	1	0	1	0	1	0	0	3
MIMAT0000692	hsa-miR-30e-5p	ENSG00000176624	MEX3C	protein_coding	chr18	48701734	48701739	48701734	48701739	-	6	0	AGO1-4,AGO2	1	0	1	0	0	0	0	2
MIMAT0000692	hsa-miR-30e-5p	ENSG00000176624	MEX3C	protein_coding	chr18	48702156	48702161	48702156	48702161	-	3	0	AGO1-4,AGO2	1	0	1	0	0	0	0	2
MIMAT0000692	hsa-miR-30e-5p	ENSG00000196628	TCF4	protein_coding	chr18	52892704	52892710	52892704	52892710	-	7	0	AGO1-4,AGO2	1	0	0	0	0	1	0	2
MIMAT0000692	hsa-miR-30e-5p	ENSG00000196628	TCF4	protein_coding	chr18	52893913	52893918	52893913	52893918	-	7	0	AGO1-4,AGO2	1	0	0	0	0	0	0	1
MIMAT0000692	hsa-miR-30e-5p	ENSG00000081923	ATP8B1	protein_coding	chr18	55313955	55313960	55313954	55313982	-	3	0	AGO1-4,AGO2	1	0	1	1	1	0	1	5
MIMAT0000692	hsa-miR-30e-5p	ENSG00000081923	ATP8B1	protein_coding	chr18	55362515	55362543	55362515	55362543	-	2	0	AGO1-4	0	0	0	1	0	0	0	1
MIMAT0000692	hsa-miR-30e-5p	ENSG00000074695	LMAN1	protein_coding	chr18	56997420	56997425	56997420	56997425	-	6	0	AGO1-4,AGO2	1	0	0	0	0	0	0	1
MIMAT0000692	hsa-miR-30e-5p	ENSG00000171791	BCL2	protein_coding	chr18	60793366	60793371	60793365	60793393	-	5	0	AGO1-4,AGO2	1	0	0	1	0	0	1	3
MIMAT0000692	hsa-miR-30e-5p	ENSG00000171451	DSEL	protein_coding	chr18	65176452	65176473	65176452	65176473	-	1	0	AGO2	0	0	0	0	1	0	0	1
MIMAT0000692	hsa-miR-30e-5p	ENSG00000171451	DSEL	protein_coding	chr18	65177165	65177170	65177165	65177170	-	1	0	AGO1-4	1	0	0	0	0	0	0	1
MIMAT0000692	hsa-miR-30e-5p	ENSG00000101493	ZNF516	protein_coding	chr18	74072926	74072931	74072926	74072931	-	1	0	AGO2	1	0	0	0	0	0	0	1
MIMAT0000692	hsa-miR-30e-5p	ENSG00000197971	MBP	protein_coding	chr18	74726511	74726517	74726510	74726531	-	1	0	AGO1-4	1	0	0	0	1	0	0	2
MIMAT0000692	hsa-miR-30e-5p	ENSG00000141759	TXNL4A	protein_coding	chr18	77732922	77732927	77732922	77732927	-	1	0	AGO2	1	0	0	0	0	0	0	1
MIMAT0000692	hsa-miR-30e-5p	ENSG00000101557	USP14	protein_coding	chr18	211633	211639	211612	211640	+	15	0	AGO1,AGO1-4,AGO2	1	0	1	1	1	0	0	4
MIMAT0000692	hsa-miR-30e-5p	ENSG00000101557	USP14	protein_coding	chr18	213646	213652	213625	213653	+	3	0	AGO2	1	0	1	1	1	0	0	4
MIMAT0000692	hsa-miR-30e-5p	ENSG00000101557	USP14	protein_coding	chr18	214539	214545	214518	214546	+	8	0	AGO1,AGO1-4,AGO2	0	0	1	1	0	0	1	3
MIMAT0000692	hsa-miR-30e-5p	ENSG00000177426	TGIF1	protein_coding	chr18	3459945	3459973	3459945	3459973	+	2	0	AGO2	0	0	0	1	0	0	0	1
MIMAT0000692	hsa-miR-30e-5p	ENSG00000088756	ARHGAP28	protein_coding	chr18	6912714	6912720	6912693	6912721	+	1	1	AGO1-4	1	0	0	1	1	0	0	3
MIMAT0000692	hsa-miR-30e-5p	ENSG00000101558	VAPA	protein_coding	chr18	9954267	9954273	9954246	9954274	+	19	1	AGO1,AGO1-4,AGO2	1	0	0	1	1	0	1	4
MIMAT0000692	hsa-miR-30e-5p	ENSG00000134265	NAPG	protein_coding	chr18	10550627	10550633	10550606	10550634	+	44	0	AGO1,AGO1-4,AGO2,AGO3,AGO4	0	0	1	1	1	0	0	3
MIMAT0000692	hsa-miR-30e-5p	ENSG00000134265	NAPG	protein_coding	chr18	10552451	10552457	10552430	10552458	+	8	0	AGO1-4,AGO2	0	0	1	1	1	0	1	4
MIMAT0000692	hsa-miR-30e-5p	ENSG00000255112	CHMP1B	protein_coding	chr18	11852238	11852243	11852238	11852243	+	7	0	AGO1-4,AGO2	1	0	0	0	0	0	0	1
MIMAT0000692	hsa-miR-30e-5p	ENSG00000085415	SEH1L	protein_coding	chr18	12985737	12985743	12985716	12985744	+	2	0	AGO1-4,AGO2	1	0	0	1	1	0	0	3
MIMAT0000692	hsa-miR-30e-5p	ENSG00000101654	RNMT	protein_coding	chr18	13760318	13760324	13760297	13760325	+	3	0	AGO1-4,AGO2	1	0	0	1	0	0	1	3
MIMAT0000692	hsa-miR-30e-5p	ENSG00000101654	RNMT	protein_coding	chr18	13761261	13761266	13761239	13761267	+	3	0	AGO1-4,AGO2	1	0	0	1	0	0	0	2
MIMAT0000692	hsa-miR-30e-5p	ENSG00000141449	GREB1L	protein_coding	chr18	19104232	19104238	19104232	19104238	+	3	0	AGO1-4	0	0	0	0	0	0	1	1
MIMAT0000692	hsa-miR-30e-5p	ENSG00000167088	SNRPD1	protein_coding	chr18	19209647	19209653	19209633	19209654	+	2	0	AGO1-4,AGO2	1	0	0	0	1	0	0	2
MIMAT0000692	hsa-miR-30e-5p	ENSG00000101752	MIB1	protein_coding	chr18	19445997	19446003	19445976	19446004	+	41	0	AGO1,AGO1-4,AGO2,AGO3,AGO4	1	0	0	1	0	0	1	3
MIMAT0000692	hsa-miR-30e-5p	ENSG00000141448	GATA6	protein_coding	chr18	19781851	19781856	19781829	19781857	+	5	0	AGO1,AGO1-4,AGO2	1	0	0	1	1	0	1	4
MIMAT0000692	hsa-miR-30e-5p	ENSG00000101782	RIOK3	protein_coding	chr18	21061593	21061599	21061572	21061600	+	5	0	AGO1-4,AGO2	1	0	0	1	1	0	1	4
MIMAT0000692	hsa-miR-30e-5p	ENSG00000141384	TAF4B	protein_coding	chr18	23970093	23970099	23970078	23970100	+	6	0	AGO1-4,AGO2	1	0	1	0	1	0	1	4
MIMAT0000692	hsa-miR-30e-5p	ENSG00000046604	DSG2	protein_coding	chr18	29122652	29122680	29122652	29122680	+	1	0	AGO1-4	0	0	0	1	0	0	0	1
MIMAT0000692	hsa-miR-30e-5p	ENSG00000046604	DSG2	protein_coding	chr18	29127975	29127981	29127954	29127982	+	6	0	AGO1-4,AGO2	0	0	1	1	1	0	0	3
MIMAT0000692	hsa-miR-30e-5p	ENSG00000046604	DSG2	protein_coding	chr18	29128496	29128502	29128475	29128503	+	10	0	AGO1,AGO1-4,AGO2	0	0	1	1	1	0	0	3
MIMAT0000692	hsa-miR-30e-5p	ENSG00000134758	RNF138	protein_coding	chr18	29710261	29710266	29710261	29710266	+	19	0	AGO1,AGO1-4,AGO2	1	0	0	0	0	0	0	1
MIMAT0000692	hsa-miR-30e-5p	ENSG00000141431	ASXL3	protein_coding	chr18	31330539	31330567	31330539	31330567	+	3	0	AGO2	0	0	0	1	0	0	0	1
MIMAT0000692	hsa-miR-30e-5p	ENSG00000134769	DTNA	protein_coding	chr18	32468137	32468142	32468115	32468143	+	6	0	AGO1-4,AGO2	1	0	0	1	0	0	1	3
MIMAT0000692	hsa-miR-30e-5p	ENSG00000166974	MAPRE2	protein_coding	chr18	32721705	32721710	32721705	32721710	+	1	0	AGO2	1	0	0	0	0	0	0	1
MIMAT0000692	hsa-miR-30e-5p	ENSG00000141429	GALNT1	protein_coding	chr18	33289962	33289968	33289941	33289969	+	32	0	AGO1-4,AGO2	1	0	0	1	1	0	1	4
MIMAT0000692	hsa-miR-30e-5p	ENSG00000152242	C18orf25	protein_coding	chr18	43846129	43846134	43846129	43846134	+	2	0	AGO1-4,AGO2	1	0	0	0	0	0	0	1
MIMAT0000692	hsa-miR-30e-5p	ENSG00000141622	RNF165	protein_coding	chr18	44037228	44037234	44037207	44037235	+	1	0	AGO2	1	0	1	1	1	0	1	5
MIMAT0000692	hsa-miR-30e-5p	ENSG00000141622	RNF165	protein_coding	chr18	44037336	44037342	44037315	44037343	+	2	0	AGO1-4,AGO2	1	0	1	1	1	0	1	5
MIMAT0000692	hsa-miR-30e-5p	ENSG00000141622	RNF165	protein_coding	chr18	44040379	44040384	44040357	44040385	+	2	0	AGO2	1	0	1	1	0	0	1	4
MIMAT0000692	hsa-miR-30e-5p	ENSG00000134030	CTIF	protein_coding	chr18	46387649	46387654	46387649	46387654	+	1	0	AGO2	1	0	0	0	0	0	0	1
MIMAT0000692	hsa-miR-30e-5p	ENSG00000101751	POLI	protein_coding	chr18	51822830	51822835	51822830	51822835	+	2	0	AGO1-4,AGO2	1	0	0	0	0	0	0	1
MIMAT0000692	hsa-miR-30e-5p	ENSG00000101751	POLI	protein_coding	chr18	51823184	51823189	51823184	51823189	+	1	0	AGO2	1	0	0	0	0	0	0	1
MIMAT0000692	hsa-miR-30e-5p	ENSG00000041353	RAB27B	protein_coding	chr18	52559488	52559495	52559467	52559495	+	2	0	AGO1-4	0	0	0	1	0	0	1	2
MIMAT0000692	hsa-miR-30e-5p	ENSG00000041353	RAB27B	protein_coding	chr18	52562397	52562425	52562397	52562425	+	1	0	AGO2	0	0	0	1	0	0	0	1
MIMAT0000692	hsa-miR-30e-5p	ENSG00000091157	WDR7	protein_coding	chr18	54694931	54694931	54694904	54694952	+	9	0	AGO1-4,AGO2	1	0	1	2	2	0	1	7
MIMAT0000692	hsa-miR-30e-5p	ENSG00000091157	WDR7	protein_coding	chr18	54694945	54694951	54694945	54694952	+	3	0	AGO1-4,AGO2	1	0	1	0	0	0	1	3
MIMAT0000692	hsa-miR-30e-5p	ENSG00000091157	WDR7	protein_coding	chr18	54696274	54696280	54696253	54696281	+	2	0	AGO2	1	0	1	1	1	0	0	4
MIMAT0000692	hsa-miR-30e-5p	ENSG00000119547	ONECUT2	protein_coding	chr18	55153991	55153996	55153969	55153997	+	4	0	AGO1-4,AGO2	1	0	0	1	0	0	1	3
MIMAT0000692	hsa-miR-30e-5p	ENSG00000049759	NEDD4L	protein_coding	chr18	56063859	56063865	56063838	56063866	+	11	0	AGO1-4,AGO2	1	0	1	1	1	1	1	6
MIMAT0000692	hsa-miR-30e-5p	ENSG00000141664	ZCCHC2	protein_coding	chr18	60244118	60244124	60244104	60244125	+	13	0	AGO1-4,AGO2	1	0	1	0	1	0	1	4
MIMAT0000692	hsa-miR-30e-5p	ENSG00000141664	ZCCHC2	protein_coding	chr18	60244879	60244884	60244879	60244884	+	23	0	AGO1,AGO1-4,AGO2	1	0	1	0	0	0	0	2
MIMAT0000692	hsa-miR-30e-5p	ENSG00000141664	ZCCHC2	protein_coding	chr18	60245688	60245694	60245674	60245695	+	12	0	AGO1-4,AGO2	1	0	1	0	1	0	1	4
MIMAT0000692	hsa-miR-30e-5p	ENSG00000170677	SOCS6	protein_coding	chr18	67993570	67993575	67993548	67993576	+	16	0	AGO1,AGO1-4,AGO2	1	0	1	1	0	0	1	4
MIMAT0000692	hsa-miR-30e-5p	ENSG00000170677	SOCS6	protein_coding	chr18	67997199	67997227	67997199	67997227	+	1	0	AGO2	0	0	0	1	0	0	0	1
MIMAT0000692	hsa-miR-30e-5p	ENSG00000166377	ATP9B	protein_coding	chr18	76870473	76870493	76870473	76870493	+	1	1	AGO2	0	0	0	0	1	0	0	1
MIMAT0000692	hsa-miR-30e-5p	ENSG00000101544	ADNP2	protein_coding	chr18	77897671	77897676	77897671	77897676	+	1	0	AGO1-4	1	0	0	0	0	0	0	1
MIMAT0000692	hsa-miR-30e-5p	ENSG00000105556	MIER2	protein_coding	chr19	305762	305768	305761	305789	-	6	0	AGO1-4,AGO2	1	0	0	1	1	0	1	4
MIMAT0000692	hsa-miR-30e-5p	ENSG00000185761	ADAMTSL5	protein_coding	chr19	1505619	1505625	1505618	1505641	-	3	0	AGO1-4,AGO2	1	0	0	0	1	0	0	2
MIMAT0000692	hsa-miR-30e-5p	ENSG00000181588	MEX3D	protein_coding	chr19	1555414	1555420	1555413	1555441	-	6	0	AGO1-4,AGO2	1	0	0	1	0	0	1	3
MIMAT0000692	hsa-miR-30e-5p	ENSG00000176619	LMNB2	protein_coding	chr19	2429823	2429828	2429823	2429828	-	7	0	AGO1,AGO1-4,AGO2	1	0	0	0	0	0	0	1
MIMAT0000692	hsa-miR-30e-5p	ENSG00000176490	DIRAS1	protein_coding	chr19	2715137	2715143	2715136	2715159	-	1	0	AGO2	1	0	0	0	1	0	0	2
MIMAT0000692	hsa-miR-30e-5p	ENSG00000178951	ZBTB7A	protein_coding	chr19	4046484	4046490	4046483	4046511	-	35	0	AGO1,AGO1-4,AGO2	1	0	0	1	1	0	1	4
MIMAT0000692	hsa-miR-30e-5p	ENSG00000141985	SH3GL1	protein_coding	chr19	4361393	4361399	4361393	4361399	-	19	0	AGO1,AGO1-4,AGO2	1	0	0	0	0	0	0	1
MIMAT0000692	hsa-miR-30e-5p	ENSG00000074842	MYDGF	protein_coding	chr19	4657638	4657645	4657637	4657658	-	16	0	AGO1-4,AGO2	1	0	0	0	1	0	0	2
MIMAT0000692	hsa-miR-30e-5p	ENSG00000127666	TICAM1	protein_coding	chr19	4816034	4816040	4816033	4816061	-	1	0	AGO1-4	1	0	0	1	1	0	0	3
MIMAT0000692	hsa-miR-30e-5p	ENSG00000105355	PLIN3	protein_coding	chr19	4838549	4838555	4838548	4838569	-	20	0	AGO1,AGO1-4,AGO2	1	0	0	0	1	0	0	2
MIMAT0000692	hsa-miR-30e-5p	ENSG00000130254	SAFB2	protein_coding	chr19	5587018	5587023	5587017	5587037	-	2	0	AGO2	1	0	0	0	1	0	0	2
MIMAT0000692	hsa-miR-30e-5p	ENSG00000087903	RFX2	protein_coding	chr19	5994733	5994739	5994732	5994760	-	3	1	AGO1-4,AGO2	1	0	0	1	1	0	1	4
MIMAT0000692	hsa-miR-30e-5p	ENSG00000125734	GPR108	protein_coding	chr19	6730013	6730019	6730012	6730040	-	2	0	AGO2	1	0	0	1	1	0	1	4
MIMAT0000692	hsa-miR-30e-5p	ENSG00000066044	ELAVL1	protein_coding	chr19	8024287	8024292	8024287	8024292	-	2	0	AGO1-4,AGO2	1	0	0	0	0	0	0	1
MIMAT0000692	hsa-miR-30e-5p	ENSG00000066044	ELAVL1	protein_coding	chr19	8026876	8026881	8026876	8026881	-	3	0	AGO2	1	0	0	0	0	0	0	1
MIMAT0000692	hsa-miR-30e-5p	ENSG00000142347	MYO1F	protein_coding	chr19	8586319	8586324	8586319	8586324	-	1	0	AGO1-4	1	0	0	0	0	0	0	1
MIMAT0000692	hsa-miR-30e-5p	ENSG00000105514	RAB3D	protein_coding	chr19	11433216	11433244	11433216	11433244	-	4	0	AGO1-4	0	0	0	1	0	0	0	1
MIMAT0000692	hsa-miR-30e-5p	ENSG00000105514	RAB3D	protein_coding	chr19	11433440	11433447	11433440	11433468	-	1	0	AGO1-4	0	0	0	1	0	0	1	2
MIMAT0000692	hsa-miR-30e-5p	ENSG00000123144	TRIR	protein_coding	chr19	12841571	12841576	12841571	12841576	-	7	0	AGO1-4,AGO2	1	0	0	0	0	0	0	1
MIMAT0000692	hsa-miR-30e-5p	ENSG00000105085	MED26	protein_coding	chr19	16686632	16686637	16686632	16686637	-	10	0	AGO1-4,AGO2	1	0	0	0	0	0	0	1
MIMAT0000692	hsa-miR-30e-5p	ENSG00000105656	ELL	protein_coding	chr19	18553630	18553636	18553629	18553657	-	11	0	AGO1-4,AGO2	1	0	0	1	1	0	1	4
MIMAT0000692	hsa-miR-30e-5p	ENSG00000064607	SUGP2	protein_coding	chr19	19105777	19105798	19105777	19105798	-	1	0	AGO2	0	0	0	0	1	0	0	1
MIMAT0000692	hsa-miR-30e-5p	ENSG00000213996	TM6SF2	protein_coding	chr19	19375437	19375443	19375436	19375461	-	1	0	AGO1-4	1	0	0	0	1	0	0	2
MIMAT0000692	hsa-miR-30e-5p	ENSG00000197020	ZNF100	protein_coding	chr19	21908904	21908911	21908903	21908931	-	8	0	AGO1-4,AGO2	1	0	0	1	1	0	0	3
MIMAT0000692	hsa-miR-30e-5p	ENSG00000131943	C19orf12	protein_coding	chr19	30192787	30192793	30192786	30192814	-	14	0	AGO1,AGO1-4,AGO2	1	0	1	1	1	0	0	4
MIMAT0000692	hsa-miR-30e-5p	ENSG00000131943	C19orf12	protein_coding	chr19	30193126	30193132	30193125	30193153	-	7	0	AGO1-4,AGO2	1	0	1	1	0	0	0	3
MIMAT0000692	hsa-miR-30e-5p	ENSG00000186017	ZNF566	protein_coding	chr19	36937559	36937565	36937558	36937586	-	1	0	AGO2	0	0	1	1	1	0	0	3
MIMAT0000692	hsa-miR-30e-5p	ENSG00000186017	ZNF566	protein_coding	chr19	36939451	36939457	36939450	36939478	-	4	2	AGO2	1	0	1	1	1	0	0	4
MIMAT0000692	hsa-miR-30e-5p	ENSG00000254004	ZNF260	protein_coding	chr19	37001653	37001658	37001653	37001658	-	1	0	AGO2	1	0	1	0	0	0	0	2
MIMAT0000692	hsa-miR-30e-5p	ENSG00000254004	ZNF260	protein_coding	chr19	37004025	37004030	37004025	37004030	-	4	0	AGO1-4,AGO2	1	0	1	0	0	0	0	2
MIMAT0000692	hsa-miR-30e-5p	ENSG00000186020	ZNF529	protein_coding	chr19	37037506	37037512	37037505	37037533	-	4	0	AGO1-4,AGO2	1	0	0	1	1	0	0	3
MIMAT0000692	hsa-miR-30e-5p	ENSG00000196967	ZNF585A	protein_coding	chr19	37638901	37638907	37638900	37638928	-	1	0	AGO1-4	0	0	1	1	0	0	0	2
MIMAT0000692	hsa-miR-30e-5p	ENSG00000196967	ZNF585A	protein_coding	chr19	37642150	37642156	37642149	37642177	-	2	0	AGO1-4,AGO2	1	0	1	1	1	0	0	4
MIMAT0000692	hsa-miR-30e-5p	ENSG00000196967	ZNF585A	protein_coding	chr19	37643457	37643485	37643457	37643485	-	5	0	AGO2	0	0	0	1	0	0	0	1
MIMAT0000692	hsa-miR-30e-5p	ENSG00000245680	ZNF585B	protein_coding	chr19	37675788	37675794	37675787	37675808	-	3	0	AGO1-4,AGO2	1	0	1	0	1	0	0	3
MIMAT0000692	hsa-miR-30e-5p	ENSG00000245680	ZNF585B	protein_coding	chr19	37677096	37677102	37677096	37677102	-	6	0	AGO1-4,AGO2	0	0	1	0	0	0	0	1
MIMAT0000692	hsa-miR-30e-5p	ENSG00000079385	CEACAM1	protein_coding	chr19	43011933	43011939	43011932	43011960	-	1	0	AGO1-4	1	0	0	1	1	0	1	4
MIMAT0000692	hsa-miR-30e-5p	ENSG00000125741	OPA3	protein_coding	chr19	46056419	46056424	46056419	46056424	-	1	0	AGO1-4	1	0	0	0	0	0	0	1
MIMAT0000692	hsa-miR-30e-5p	ENSG00000198093	ZNF649	protein_coding	chr19	52393768	52393773	52393768	52393773	-	1	0	AGO1	1	0	0	0	0	0	0	1
MIMAT0000692	hsa-miR-30e-5p	ENSG00000142556	ZNF614	protein_coding	chr19	52518602	52518607	52518602	52518607	-	13	0	AGO1-4,AGO2	1	0	0	0	0	0	0	1
MIMAT0000692	hsa-miR-30e-5p	ENSG00000204604	ZNF468	protein_coding	chr19	53342926	53342931	53342926	53342931	-	1	0	AGO1	1	0	0	0	0	0	0	1
MIMAT0000692	hsa-miR-30e-5p	ENSG00000105063	PPP6R1	protein_coding	chr19	55741149	55741154	55741149	55741154	-	1	0	AGO1-4	1	0	0	0	0	0	0	1
MIMAT0000692	hsa-miR-30e-5p	ENSG00000197128	ZNF772	protein_coding	chr19	57983467	57983472	57983467	57983472	-	5	0	AGO1-4,AGO2	1	0	0	0	0	0	0	1
MIMAT0000692	hsa-miR-30e-5p	ENSG00000083814	ZNF671	protein_coding	chr19	58231428	58231433	58231428	58231433	-	1	0	AGO2	1	0	0	0	0	0	0	1
MIMAT0000692	hsa-miR-30e-5p	ENSG00000099804	CDC34	protein_coding	chr19	541576	541581	541576	541581	+	19	0	AGO1-4,AGO2	1	0	0	0	0	0	0	1
MIMAT0000692	hsa-miR-30e-5p	ENSG00000011304	PTBP1	protein_coding	chr19	810951	810956	810951	810956	+	2	0	AGO1-4,AGO2	1	0	0	0	0	0	0	1
MIMAT0000692	hsa-miR-30e-5p	ENSG00000116017	ARID3A	protein_coding	chr19	972466	972472	972445	972473	+	16	0	AGO1-4,AGO2	1	0	0	1	1	0	1	4
MIMAT0000692	hsa-miR-30e-5p	ENSG00000116017	ARID3A	protein_coding	chr19	975810	975816	975788	975816	+	7	3	AGO1-4,AGO2	0	0	0	1	0	0	1	2
MIMAT0000692	hsa-miR-30e-5p	ENSG00000161082	CELF5	protein_coding	chr19	3296713	3296719	3296702	3296720	+	1	0	AGO1-4	0	0	0	0	1	0	1	2
MIMAT0000692	hsa-miR-30e-5p	ENSG00000141965	FEM1A	protein_coding	chr19	4795513	4795518	4795513	4795518	+	4	0	AGO1,AGO1-4,AGO2	1	0	0	0	0	0	0	1
MIMAT0000692	hsa-miR-30e-5p	ENSG00000125657	TNFSF9	protein_coding	chr19	6535889	6535895	6535868	6535896	+	4	0	AGO2	1	0	0	1	1	0	0	3
MIMAT0000692	hsa-miR-30e-5p	ENSG00000130164	LDLR	protein_coding	chr19	11242434	11242440	11242434	11242440	+	29	0	AGO1,AGO1-4,AGO2,AGO3	1	0	0	0	0	0	1	2
MIMAT0000692	hsa-miR-30e-5p	ENSG00000171223	JUNB	protein_coding	chr19	12903104	12903132	12903104	12903132	+	10	0	AGO1-4,AGO2	0	0	0	1	0	0	0	1
MIMAT0000692	hsa-miR-30e-5p	ENSG00000171223	JUNB	protein_coding	chr19	12903797	12903802	12903775	12903803	+	17	4	AGO1-4,AGO2	1	0	0	1	0	0	1	3
MIMAT0000692	hsa-miR-30e-5p	ENSG00000008441	NFIX	protein_coding	chr19	13209405	13209410	13209405	13209410	+	1	0	AGO1-4	1	0	0	0	0	0	0	1
MIMAT0000692	hsa-miR-30e-5p	ENSG00000160877	NACC1	protein_coding	chr19	13251108	13251113	13251108	13251113	+	8	0	AGO1-4,AGO2	1	0	0	0	0	0	0	1
MIMAT0000692	hsa-miR-30e-5p	ENSG00000160888	IER2	protein_coding	chr19	13265626	13265632	13265612	13265633	+	16	0	AGO1,AGO1-4,AGO2	1	0	0	0	1	0	1	3
MIMAT0000692	hsa-miR-30e-5p	ENSG00000037757	MRI1	protein_coding	chr19	13884938	13884944	13884924	13884945	+	3	0	AGO1-4,AGO2	1	0	1	0	1	0	0	3
MIMAT0000692	hsa-miR-30e-5p	ENSG00000167460	TPM4	protein_coding	chr19	16213588	16213594	16213566	16213594	+	17	0	AGO1-4,AGO2	0	0	0	1	0	1	1	3
MIMAT0000692	hsa-miR-30e-5p	ENSG00000167461	RAB8A	protein_coding	chr19	16244384	16244390	16244363	16244391	+	11	0	AGO1,AGO1-4,AGO2	1	0	0	1	1	0	1	4
MIMAT0000692	hsa-miR-30e-5p	ENSG00000099331	MYO9B	protein_coding	chr19	17323422	17323427	17323422	17323427	+	2	0	AGO2	1	0	0	0	0	0	0	1
MIMAT0000692	hsa-miR-30e-5p	ENSG00000105393	BABAM1	protein_coding	chr19	17387653	17387674	17387653	17387674	+	6	0	AGO1,AGO1-4,AGO2	0	0	0	0	1	0	0	1
MIMAT0000692	hsa-miR-30e-5p	ENSG00000269307	AC010463.1	protein_coding	chr19	17387653	17387674	17387653	17387674	+	6	0	AGO1,AGO1-4,AGO2	0	0	0	0	1	0	0	1
MIMAT0000692	hsa-miR-30e-5p	ENSG00000099308	MAST3	protein_coding	chr19	18262012	18262018	18261991	18262019	+	12	0	AGO1-4,AGO2	1	0	0	1	1	0	1	4
MIMAT0000692	hsa-miR-30e-5p	ENSG00000105647	PIK3R2	protein_coding	chr19	18280476	18280481	18280454	18280482	+	14	0	AGO1-4,AGO2	1	0	0	1	1	1	1	5
MIMAT0000692	hsa-miR-30e-5p	ENSG00000268173	AC007192.1	protein_coding	chr19	18280476	18280481	18280454	18280482	+	14	0	AGO1-4,AGO2	1	0	0	1	1	1	1	5
MIMAT0000692	hsa-miR-30e-5p	ENSG00000130517	PGPEP1	protein_coding	chr19	18479418	18479425	18479418	18479425	+	2	0	AGO1-4	1	0	0	0	0	0	0	1
MIMAT0000692	hsa-miR-30e-5p	ENSG00000105700	KXD1	protein_coding	chr19	18680129	18680135	18680108	18680136	+	10	0	AGO1,AGO1-4,AGO2	1	0	0	1	1	0	1	4
MIMAT0000692	hsa-miR-30e-5p	ENSG00000129933	MAU2	protein_coding	chr19	19468538	19468543	19468538	19468544	+	3	0	AGO1-4,AGO2	1	0	0	0	0	0	1	2
MIMAT0000692	hsa-miR-30e-5p	ENSG00000168813	ZNF507	protein_coding	chr19	32877189	32877195	32877168	32877196	+	28	0	AGO1,AGO1-4,AGO2,AGO3,AGO4	1	0	0	1	1	0	1	4
MIMAT0000692	hsa-miR-30e-5p	ENSG00000178904	DPY19L3	protein_coding	chr19	32973120	32973126	32973098	32973126	+	3	0	AGO1-4,AGO2	0	0	0	1	0	0	1	2
MIMAT0000692	hsa-miR-30e-5p	ENSG00000178904	DPY19L3	protein_coding	chr19	32973276	32973282	32973255	32973283	+	13	0	AGO1,AGO1-4,AGO2,AGO3	1	0	0	1	1	0	1	4
MIMAT0000692	hsa-miR-30e-5p	ENSG00000166398	KIAA0355	protein_coding	chr19	34845805	34845811	34845784	34845812	+	12	0	AGO1-4,AGO2	1	0	0	1	1	0	1	4
MIMAT0000692	hsa-miR-30e-5p	ENSG00000126249	PDCD2L	protein_coding	chr19	34917060	34917066	34917048	34917067	+	4	0	AGO1-4,AGO2	0	0	1	0	1	0	0	2
MIMAT0000692	hsa-miR-30e-5p	ENSG00000249115	HAUS5	protein_coding	chr19	36114227	36114232	36114227	36114232	+	1	0	AGO1-4	1	0	0	0	0	0	0	1
MIMAT0000692	hsa-miR-30e-5p	ENSG00000161298	ZNF382	protein_coding	chr19	37119132	37119138	37119118	37119139	+	1	0	AGO2	1	0	0	0	1	0	1	3
MIMAT0000692	hsa-miR-30e-5p	ENSG00000189042	ZNF567	protein_coding	chr19	37211713	37211719	37211701	37211720	+	12	0	AGO1,AGO1-4,AGO2	1	0	0	0	1	0	0	2
MIMAT0000692	hsa-miR-30e-5p	ENSG00000251247	ZNF345	protein_coding	chr19	37370150	37370156	37370138	37370157	+	1	0	AGO1-4	1	0	0	0	1	0	0	2
MIMAT0000692	hsa-miR-30e-5p	ENSG00000099338	CATSPERG	protein_coding	chr19	38853314	38853342	38853314	38853342	+	1	0	AGO1-4	0	0	0	1	0	0	0	1
MIMAT0000692	hsa-miR-30e-5p	ENSG00000130669	PAK4	protein_coding	chr19	39672503	39672510	39672503	39672510	+	1	0	AGO1-4	0	0	0	0	0	0	1	1
MIMAT0000692	hsa-miR-30e-5p	ENSG00000268975	MIA-RAB4B	protein_coding	chr19	41302836	41302842	41302815	41302843	+	4	0	AGO1-4,AGO2	1	0	0	1	1	0	1	4
MIMAT0000692	hsa-miR-30e-5p	ENSG00000269858	EGLN2	protein_coding	chr19	41314320	41314325	41314305	41314326	+	10	0	AGO1-4,AGO2	1	0	0	0	1	0	0	2
MIMAT0000692	hsa-miR-30e-5p	ENSG00000142039	CCDC97	protein_coding	chr19	41829586	41829592	41829565	41829593	+	9	0	AGO1-4,AGO2	1	0	1	1	1	0	1	5
MIMAT0000692	hsa-miR-30e-5p	ENSG00000142039	CCDC97	protein_coding	chr19	41830766	41830772	41830745	41830773	+	10	0	AGO1,AGO2	1	0	1	1	1	0	0	4
MIMAT0000692	hsa-miR-30e-5p	ENSG00000142230	SAE1	protein_coding	chr19	47713350	47713356	47713336	47713357	+	22	0	AGO1,AGO1-4,AGO2	1	0	0	0	1	0	0	2
MIMAT0000692	hsa-miR-30e-5p	ENSG00000105550	FGF21	protein_coding	chr19	49261478	49261495	49261478	49261495	+	1	0	AGO1-4	0	0	0	0	1	0	0	1
MIMAT0000692	hsa-miR-30e-5p	ENSG00000196961	AP2A1	protein_coding	chr19	50310185	50310191	50310164	50310192	+	25	1	AGO1,AGO1-4,AGO2,AGO3	1	0	0	1	1	0	1	4
MIMAT0000692	hsa-miR-30e-5p	ENSG00000142528	ZNF473	protein_coding	chr19	50550787	50550793	50550773	50550794	+	1	0	AGO1-4	1	0	0	0	1	0	0	2
MIMAT0000692	hsa-miR-30e-5p	ENSG00000105497	ZNF175	protein_coding	chr19	52092759	52092766	52092746	52092767	+	2	0	AGO1,AGO2	1	0	0	0	1	0	0	2
MIMAT0000692	hsa-miR-30e-5p	ENSG00000198464	ZNF480	protein_coding	chr19	52828254	52828261	52828241	52828262	+	4	0	AGO1-4	1	0	0	0	1	0	0	2
MIMAT0000692	hsa-miR-30e-5p	ENSG00000160336	ZNF761	protein_coding	chr19	53960100	53960105	53960100	53960105	+	3	0	AGO1-4,AGO2	1	0	0	0	0	0	0	1
MIMAT0000692	hsa-miR-30e-5p	ENSG00000160336	ZNF761	protein_coding	chr19	53960182	53960187	53960182	53960187	+	4	0	AGO1-4,AGO2	1	0	0	0	0	0	0	1
MIMAT0000692	hsa-miR-30e-5p	ENSG00000160336	ZNF761	protein_coding	chr19	53960372	53960378	53960372	53960378	+	1	0	AGO1-4	1	0	0	0	0	0	0	1
MIMAT0000692	hsa-miR-30e-5p	ENSG00000198346	ZNF813	protein_coding	chr19	53995569	53995574	53995569	53995574	+	6	0	AGO1-4	1	0	0	0	0	0	0	1
MIMAT0000692	hsa-miR-30e-5p	ENSG00000083844	ZNF264	protein_coding	chr19	57724508	57724513	57724486	57724514	+	20	0	AGO1,AGO1-4,AGO2,AGO3	1	0	0	1	0	0	1	3
MIMAT0000692	hsa-miR-30e-5p	ENSG00000083844	ZNF264	protein_coding	chr19	57724911	57724916	57724911	57724916	+	3	0	AGO1-4,AGO2	1	0	0	0	0	0	0	1
MIMAT0000692	hsa-miR-30e-5p	ENSG00000083844	ZNF264	protein_coding	chr19	57728200	57728206	57728179	57728207	+	3	0	AGO2	1	0	0	1	0	0	0	2
MIMAT0000692	hsa-miR-30e-5p	ENSG00000083844	ZNF264	protein_coding	chr19	57732341	57732348	57732321	57732349	+	1	0	AGO2	1	0	0	1	0	0	0	2
MIMAT0000692	hsa-miR-30e-5p	ENSG00000204524	ZNF805	protein_coding	chr19	57766228	57766233	57766206	57766234	+	8	0	AGO1,AGO1-4,AGO2	0	0	1	1	0	0	0	2
MIMAT0000692	hsa-miR-30e-5p	ENSG00000197714	ZNF460	protein_coding	chr19	57803920	57803925	57803920	57803925	+	8	0	AGO1-4,AGO2	1	0	0	0	0	0	0	1
MIMAT0000692	hsa-miR-30e-5p	ENSG00000178229	ZNF543	protein_coding	chr19	57840854	57840859	57840854	57840859	+	15	0	AGO1,AGO1-4,AGO2	1	0	0	0	0	0	0	1
MIMAT0000692	hsa-miR-30e-5p	ENSG00000213762	ZNF134	protein_coding	chr19	58133154	58133159	58133154	58133159	+	6	0	AGO1,AGO1-4,AGO2	1	0	0	0	0	0	0	1
MIMAT0000692	hsa-miR-30e-5p	ENSG00000204519	ZNF551	protein_coding	chr19	58200844	58200865	58200844	58200865	+	1	0	AGO1	0	0	0	0	1	0	0	1
MIMAT0000692	hsa-miR-30e-5p	ENSG00000198131	ZNF544	protein_coding	chr19	58774865	58774871	58774850	58774872	+	3	0	AGO1-4,AGO2	1	0	0	0	1	0	0	2
MIMAT0000692	hsa-miR-30e-5p	ENSG00000182318	ZSCAN22	protein_coding	chr19	58852478	58852485	58852467	58852486	+	4	0	AGO1-4,AGO2	1	0	0	0	1	0	0	2
MIMAT0000692	hsa-miR-30e-5p	ENSG00000171574	ZNF584	protein_coding	chr19	58929572	58929577	58929572	58929577	+	1	0	AGO1-4	1	0	0	0	0	0	0	1
MIMAT0000692	hsa-miR-30e-5p	ENSG00000171865	RNASEH1	protein_coding	chr2	3593136	3593143	3593135	3593163	-	3	0	AGO1-4,AGO2	1	0	0	1	1	0	0	3
MIMAT0000692	hsa-miR-30e-5p	ENSG00000171865	RNASEH1	protein_coding	chr2	3596237	3596265	3596237	3596265	-	1	3	AGO2	0	0	0	1	0	0	0	1
MIMAT0000692	hsa-miR-30e-5p	ENSG00000171865	RNASEH1	protein_coding	chr2	3597982	3598010	3597982	3598010	-	1	0	AGO2	0	0	0	1	0	0	0	1
MIMAT0000692	hsa-miR-30e-5p	ENSG00000134313	KIDINS220	protein_coding	chr2	8869542	8869547	8869542	8869547	-	1	0	AGO1-4	1	0	0	0	0	0	0	1
MIMAT0000692	hsa-miR-30e-5p	ENSG00000134318	ROCK2	protein_coding	chr2	11321267	11321272	11321266	11321294	-	2	0	AGO1-4	0	0	1	1	0	0	1	3
MIMAT0000692	hsa-miR-30e-5p	ENSG00000134318	ROCK2	protein_coding	chr2	11322245	11322250	11322244	11322272	-	3	0	AGO1-4,AGO2	1	0	1	1	0	0	0	3
MIMAT0000692	hsa-miR-30e-5p	ENSG00000134318	ROCK2	protein_coding	chr2	11322759	11322764	11322758	11322786	-	4	0	AGO1-4,AGO2	1	0	1	1	0	0	0	3
MIMAT0000692	hsa-miR-30e-5p	ENSG00000169016	E2F6	protein_coding	chr2	11585530	11585535	11585530	11585535	-	14	0	AGO1-4,AGO2	1	0	0	0	0	0	0	1
MIMAT0000692	hsa-miR-30e-5p	ENSG00000169016	E2F6	protein_coding	chr2	11585542	11585547	11585542	11585547	-	17	0	AGO1,AGO1-4,AGO2	1	0	0	0	0	0	0	1
MIMAT0000692	hsa-miR-30e-5p	ENSG00000197872	FAM49A	protein_coding	chr2	16734148	16734154	16734147	16734175	-	2	0	AGO1-4,AGO2	1	0	0	1	1	0	1	4
MIMAT0000692	hsa-miR-30e-5p	ENSG00000055917	PUM2	protein_coding	chr2	20450301	20450306	20450300	20450306	-	9	0	AGO1-4,AGO2	1	0	0	0	0	0	1	2
MIMAT0000692	hsa-miR-30e-5p	ENSG00000119778	ATAD2B	protein_coding	chr2	23971988	23971993	23971987	23972015	-	2	0	AGO1,AGO1-4	1	0	1	1	0	0	0	3
MIMAT0000692	hsa-miR-30e-5p	ENSG00000119778	ATAD2B	protein_coding	chr2	23972331	23972337	23972330	23972358	-	2	0	AGO1-4,AGO2	1	0	1	1	1	0	1	5
MIMAT0000692	hsa-miR-30e-5p	ENSG00000119778	ATAD2B	protein_coding	chr2	23973340	23973345	23973339	23973367	-	1	0	AGO2	1	0	1	1	0	0	0	3
MIMAT0000692	hsa-miR-30e-5p	ENSG00000119778	ATAD2B	protein_coding	chr2	23973371	23973377	23973370	23973398	-	1	0	AGO2	1	0	1	1	1	0	1	5
MIMAT0000692	hsa-miR-30e-5p	ENSG00000119778	ATAD2B	protein_coding	chr2	24021151	24021179	24021151	24021179	-	3	0	AGO1-4,AGO2	0	0	0	1	0	0	0	1
MIMAT0000692	hsa-miR-30e-5p	ENSG00000198399	ITSN2	protein_coding	chr2	24463663	24463691	24463663	24463691	-	2	0	AGO1-4	0	0	0	1	0	0	0	1
MIMAT0000692	hsa-miR-30e-5p	ENSG00000198399	ITSN2	protein_coding	chr2	24464957	24464985	24464957	24464985	-	2	0	AGO1-4,AGO2	0	0	0	1	0	0	0	1
MIMAT0000692	hsa-miR-30e-5p	ENSG00000119772	DNMT3A	protein_coding	chr2	25456363	25456369	25456362	25456390	-	1	0	AGO1-4	1	0	0	1	1	0	1	4
MIMAT0000692	hsa-miR-30e-5p	ENSG00000084731	KIF3C	protein_coding	chr2	26149889	26149895	26149889	26149895	-	1	0	AGO2	1	0	0	0	0	0	1	2
MIMAT0000692	hsa-miR-30e-5p	ENSG00000138061	CYP1B1	protein_coding	chr2	38295464	38295469	38295464	38295469	-	5	0	AGO1-4,AGO2	1	0	0	0	0	0	0	1
MIMAT0000692	hsa-miR-30e-5p	ENSG00000119787	ATL2	protein_coding	chr2	38523048	38523054	38523048	38523076	-	19	0	AGO1,AGO1-4,AGO2	0	0	0	1	1	0	1	3
MIMAT0000692	hsa-miR-30e-5p	ENSG00000115875	SRSF7	protein_coding	chr2	38970774	38970779	38970773	38970801	-	3	0	AGO1,AGO2	1	0	1	1	0	0	0	3
MIMAT0000692	hsa-miR-30e-5p	ENSG00000115875	SRSF7	protein_coding	chr2	38972233	38972239	38972232	38972260	-	43	6	AGO1,AGO1-4,AGO2,AGO3	1	0	1	1	1	0	1	5
MIMAT0000692	hsa-miR-30e-5p	ENSG00000115904	SOS1	protein_coding	chr2	39209703	39209731	39209703	39209731	-	2	0	AGO2	0	0	0	1	0	0	0	1
MIMAT0000692	hsa-miR-30e-5p	ENSG00000115904	SOS1	protein_coding	chr2	39212112	39212140	39212112	39212140	-	4	0	AGO1-4,AGO2	0	0	0	1	0	0	0	1
MIMAT0000692	hsa-miR-30e-5p	ENSG00000115904	SOS1	protein_coding	chr2	39212405	39212412	39212405	39212433	-	2	0	AGO1-4	0	0	0	1	1	0	1	3
MIMAT0000692	hsa-miR-30e-5p	ENSG00000115904	SOS1	protein_coding	chr2	39224413	39224441	39224413	39224441	-	1	0	AGO1-4	0	0	0	1	0	0	0	1
MIMAT0000692	hsa-miR-30e-5p	ENSG00000115904	SOS1	protein_coding	chr2	39234192	39234220	39234192	39234220	-	3	1	AGO1-4,AGO2	0	0	0	1	0	0	0	1
MIMAT0000692	hsa-miR-30e-5p	ENSG00000115904	SOS1	protein_coding	chr2	39262382	39262410	39262382	39262410	-	1	1	AGO1-4	0	0	0	1	0	0	0	1
MIMAT0000692	hsa-miR-30e-5p	ENSG00000115904	SOS1	protein_coding	chr2	39283965	39283993	39283965	39283993	-	4	1	AGO1-4,AGO2	0	0	0	1	0	0	0	1
MIMAT0000692	hsa-miR-30e-5p	ENSG00000152518	ZFP36L2	protein_coding	chr2	43450337	43450343	43450336	43450357	-	20	1	AGO1,AGO1-4,AGO2	0	0	0	0	1	0	1	2
MIMAT0000692	hsa-miR-30e-5p	ENSG00000138078	PREPL	protein_coding	chr2	44546373	44546380	44546372	44546393	-	18	0	AGO1-4,AGO2	1	0	0	0	1	0	0	2
MIMAT0000692	hsa-miR-30e-5p	ENSG00000138078	PREPL	protein_coding	chr2	44548176	44548181	44548176	44548181	-	1	0	AGO2	1	0	0	0	0	0	0	1
MIMAT0000692	hsa-miR-30e-5p	ENSG00000180398	MCFD2	protein_coding	chr2	47132294	47132299	47132294	47132299	-	3	0	AGO1,AGO1-4	1	0	0	0	0	0	0	1
MIMAT0000692	hsa-miR-30e-5p	ENSG00000138081	FBXO11	protein_coding	chr2	48040197	48040203	48040196	48040215	-	2	0	AGO1-4,AGO2	1	0	1	0	1	0	0	3
MIMAT0000692	hsa-miR-30e-5p	ENSG00000115239	ASB3	protein_coding	chr2	53897259	53897265	53897258	53897279	-	3	0	AGO1-4,AGO2	1	0	0	0	1	0	0	2
MIMAT0000692	hsa-miR-30e-5p	ENSG00000068878	PSME4	protein_coding	chr2	54092383	54092388	54092382	54092410	-	2	1	AGO1-4,AGO2	1	0	0	1	0	0	0	2
MIMAT0000692	hsa-miR-30e-5p	ENSG00000068878	PSME4	protein_coding	chr2	54114523	54114551	54114523	54114551	-	15	0	AGO1-4,AGO2	0	0	0	1	0	0	0	1
MIMAT0000692	hsa-miR-30e-5p	ENSG00000068878	PSME4	protein_coding	chr2	54115020	54115048	54115020	54115048	-	6	0	AGO1-4	0	0	0	1	0	0	0	1
MIMAT0000692	hsa-miR-30e-5p	ENSG00000138035	PNPT1	protein_coding	chr2	55862443	55862449	55862442	55862463	-	1	0	AGO2	0	0	1	0	1	0	0	2
MIMAT0000692	hsa-miR-30e-5p	ENSG00000138035	PNPT1	protein_coding	chr2	55862991	55862996	55862991	55862996	-	2	0	AGO1-4,AGO2	1	0	1	0	0	0	0	2
MIMAT0000692	hsa-miR-30e-5p	ENSG00000115392	FANCL	protein_coding	chr2	58386538	58386544	58386537	58386559	-	12	0	AGO1,AGO1-4,AGO2	1	0	0	0	1	0	0	2
MIMAT0000692	hsa-miR-30e-5p	ENSG00000119866	BCL11A	protein_coding	chr2	60685832	60685837	60685831	60685837	-	5	0	AGO2	1	0	0	0	0	0	1	2
MIMAT0000692	hsa-miR-30e-5p	ENSG00000162927	PUS10	protein_coding	chr2	61169446	61169452	61169445	61169468	-	2	0	AGO1-4	1	0	0	0	1	0	1	3
MIMAT0000692	hsa-miR-30e-5p	ENSG00000115464	USP34	protein_coding	chr2	61414812	61414817	61414811	61414832	-	5	0	AGO1-4,AGO2	1	0	0	0	1	0	0	2
MIMAT0000692	hsa-miR-30e-5p	ENSG00000115464	USP34	protein_coding	chr2	61454135	61454141	61454134	61454153	-	1	0	AGO1-4	0	0	1	0	1	0	0	2
MIMAT0000692	hsa-miR-30e-5p	ENSG00000082898	XPO1	protein_coding	chr2	61705074	61705079	61705073	61705101	-	10	0	AGO1-4,AGO2	1	0	1	1	1	0	1	5
MIMAT0000692	hsa-miR-30e-5p	ENSG00000082898	XPO1	protein_coding	chr2	61705128	61705134	61705127	61705155	-	24	0	AGO1,AGO1-4,AGO2	1	0	1	1	1	0	1	5
MIMAT0000692	hsa-miR-30e-5p	ENSG00000170264	FAM161A	protein_coding	chr2	62052155	62052179	62052155	62052183	-	1	0	AGO2	0	0	0	1	1	0	0	2
MIMAT0000692	hsa-miR-30e-5p	ENSG00000170264	FAM161A	protein_coding	chr2	62052718	62052723	62052717	62052745	-	5	0	AGO1,AGO2	0	0	1	1	0	0	0	2
MIMAT0000692	hsa-miR-30e-5p	ENSG00000115484	CCT4	protein_coding	chr2	62095550	62095555	62095550	62095555	-	2	0	AGO1-4,AGO2	1	0	0	0	0	0	0	1
MIMAT0000692	hsa-miR-30e-5p	ENSG00000197329	PELI1	protein_coding	chr2	64321478	64321483	64321477	64321505	-	13	0	AGO1-4,AGO2	1	0	0	1	1	0	1	4
MIMAT0000692	hsa-miR-30e-5p	ENSG00000138069	RAB1A	protein_coding	chr2	65313994	65313999	65313993	65314014	-	1	0	AGO2	1	0	0	0	1	0	0	2
MIMAT0000692	hsa-miR-30e-5p	ENSG00000221823	PPP3R1	protein_coding	chr2	68406482	68406488	68406481	68406509	-	23	0	AGO1,AGO1-4,AGO2,AGO3	1	0	0	1	1	0	1	4
MIMAT0000692	hsa-miR-30e-5p	ENSG00000115977	AAK1	protein_coding	chr2	69697411	69697417	69697411	69697417	-	1	0	AGO2	1	0	0	0	0	0	0	1
MIMAT0000692	hsa-miR-30e-5p	ENSG00000115977	AAK1	protein_coding	chr2	69701013	69701018	69701013	69701018	-	1	0	AGO2	1	0	0	0	0	0	0	1
MIMAT0000692	hsa-miR-30e-5p	ENSG00000116001	TIA1	protein_coding	chr2	70439784	70439790	70439783	70439811	-	5	0	AGO1-4,AGO2	1	0	1	1	1	0	1	5
MIMAT0000692	hsa-miR-30e-5p	ENSG00000035141	FAM136A	protein_coding	chr2	70524010	70524016	70524009	70524030	-	6	0	AGO1-4,AGO2	1	0	0	0	1	0	0	2
MIMAT0000692	hsa-miR-30e-5p	ENSG00000035141	FAM136A	protein_coding	chr2	70524333	70524338	70524333	70524338	-	4	0	AGO1-4,AGO2	1	0	0	0	0	0	0	1
MIMAT0000692	hsa-miR-30e-5p	ENSG00000124374	PAIP2B	protein_coding	chr2	71415008	71415013	71415008	71415013	-	1	0	AGO1-4	1	0	0	0	0	0	0	1
MIMAT0000692	hsa-miR-30e-5p	ENSG00000144048	DUSP11	protein_coding	chr2	73989643	73989649	73989642	73989663	-	10	0	AGO1-4,AGO2	1	0	0	0	1	0	0	2
MIMAT0000692	hsa-miR-30e-5p	ENSG00000115525	ST3GAL5	protein_coding	chr2	86066946	86066951	86066946	86066951	-	8	0	AGO1,AGO1-4,AGO2	1	0	0	0	0	0	0	1
MIMAT0000692	hsa-miR-30e-5p	ENSG00000068654	POLR1A	protein_coding	chr2	86248002	86248030	86248002	86248030	-	2	0	AGO1-4,AGO2	0	0	0	1	0	0	0	1
MIMAT0000692	hsa-miR-30e-5p	ENSG00000068654	POLR1A	protein_coding	chr2	86252001	86252029	86252001	86252029	-	1	0	AGO1-4	0	0	0	1	0	0	0	1
MIMAT0000692	hsa-miR-30e-5p	ENSG00000068654	POLR1A	protein_coding	chr2	86254303	86254308	86254302	86254330	-	3	0	AGO1-4,AGO2	1	0	0	1	0	0	0	2
MIMAT0000692	hsa-miR-30e-5p	ENSG00000068654	POLR1A	protein_coding	chr2	86255107	86255135	86255107	86255135	-	6	0	AGO1-4,AGO2	0	0	0	1	0	0	0	1
MIMAT0000692	hsa-miR-30e-5p	ENSG00000068654	POLR1A	protein_coding	chr2	86308062	86308090	86308062	86308090	-	6	0	AGO1-4	0	0	0	1	0	0	0	1
MIMAT0000692	hsa-miR-30e-5p	ENSG00000132305	IMMT	protein_coding	chr2	86371280	86371285	86371280	86371285	-	3	0	AGO1-4,AGO2	1	0	0	0	0	0	0	1
MIMAT0000692	hsa-miR-30e-5p	ENSG00000068615	REEP1	protein_coding	chr2	86441782	86441788	86441781	86441809	-	1	0	AGO1-4	1	0	0	1	1	0	1	4
MIMAT0000692	hsa-miR-30e-5p	ENSG00000115561	CHMP3	protein_coding	chr2	86731359	86731364	86731359	86731364	-	3	0	AGO1-4	1	0	0	0	0	0	0	1
MIMAT0000692	hsa-miR-30e-5p	ENSG00000115561	CHMP3	protein_coding	chr2	86732004	86732009	86732004	86732009	-	1	0	AGO1-4	1	0	0	0	0	0	0	1
MIMAT0000692	hsa-miR-30e-5p	ENSG00000172071	EIF2AK3	protein_coding	chr2	88856659	88856664	88856659	88856664	-	3	0	AGO1-4,AGO2	1	0	0	0	0	0	0	1
MIMAT0000692	hsa-miR-30e-5p	ENSG00000135945	REV1	protein_coding	chr2	100017439	100017444	100017438	100017466	-	3	0	AGO1-4	1	0	0	1	1	1	1	5
MIMAT0000692	hsa-miR-30e-5p	ENSG00000144218	AFF3	protein_coding	chr2	100166612	100166618	100166611	100166639	-	1	0	AGO1-4	1	0	1	1	1	0	1	5
MIMAT0000692	hsa-miR-30e-5p	ENSG00000144218	AFF3	protein_coding	chr2	100166640	100166645	100166639	100166667	-	3	0	AGO1-4	1	0	1	1	0	0	0	3
MIMAT0000692	hsa-miR-30e-5p	ENSG00000144218	AFF3	protein_coding	chr2	100166688	100166694	100166687	100166715	-	4	0	AGO1-4	1	0	1	1	1	0	0	4
MIMAT0000692	hsa-miR-30e-5p	ENSG00000144218	AFF3	protein_coding	chr2	100199326	100199354	100199326	100199354	-	3	0	AGO1-4,AGO2	0	0	0	1	0	0	0	1
MIMAT0000692	hsa-miR-30e-5p	ENSG00000170500	LONRF2	protein_coding	chr2	100890404	100890410	100890404	100890410	-	3	0	AGO1-4	1	0	0	0	0	0	0	1
MIMAT0000692	hsa-miR-30e-5p	ENSG00000170500	LONRF2	protein_coding	chr2	100899847	100899852	100899847	100899852	-	2	0	AGO1-4	1	0	0	0	0	0	0	1
MIMAT0000692	hsa-miR-30e-5p	ENSG00000170500	LONRF2	protein_coding	chr2	100900453	100900458	100900453	100900458	-	2	0	AGO1-4,AGO2	1	0	0	0	0	0	0	1
MIMAT0000692	hsa-miR-30e-5p	ENSG00000163162	RNF149	protein_coding	chr2	101893482	101893488	101893481	101893505	-	11	0	AGO1,AGO1-4,AGO2	1	0	0	0	1	0	0	2
MIMAT0000692	hsa-miR-30e-5p	ENSG00000135960	EDAR	protein_coding	chr2	109512952	109512959	109512951	109512979	-	1	0	AGO1-4	1	0	0	1	1	0	0	3
MIMAT0000692	hsa-miR-30e-5p	ENSG00000183054	RGPD6	protein_coding	chr2	111273106	111273127	111273106	111273127	-	7	0	AGO1-4,AGO2	0	0	0	0	1	0	0	1
MIMAT0000692	hsa-miR-30e-5p	ENSG00000153107	ANAPC1	protein_coding	chr2	112525257	112525285	112525257	112525285	-	1	0	AGO2	0	0	0	1	0	0	0	1
MIMAT0000692	hsa-miR-30e-5p	ENSG00000153107	ANAPC1	protein_coding	chr2	112573063	112573091	112573063	112573091	-	8	0	AGO1-4,AGO2	0	0	0	1	0	0	0	1
MIMAT0000692	hsa-miR-30e-5p	ENSG00000153107	ANAPC1	protein_coding	chr2	112576478	112576506	112576478	112576506	-	4	1	AGO1-4	0	0	0	1	0	0	0	1
MIMAT0000692	hsa-miR-30e-5p	ENSG00000144161	ZC3H8	protein_coding	chr2	112973965	112973970	112973964	112973992	-	2	0	AGO1-4	1	0	0	1	0	0	0	2
[truncated: 2,116 more rows]

## Sheet: Sheet1
9 common elements in "List 1" and "List 2":
STC1	7.04
RTN4R	3.72
LYN	2.99
CEACAM1	2.86045
MYO5A	2.46
SLC4A7	2.41
KRAS	2.12
SIX1	0.32
ACTC1	0.12
